# Supplementary material for: Bioinformatic Study of Transcriptome Changes in the Mice Lumbar Spinal Cord After the 30-Day Spaceflight and Subsequent 7-Day Readaptation on Earth: New Insights Into Molecular Mechanisms of the Hypogravity Motor Syndrome
Source: Front Pharmacol. 2019 Jul 11;10:747. doi: 10.3389/fphar.2019.00747 (PMC6637859; doi:10.3389/fphar.2019.00747)
Supplement: Table S2 — Differentially expressed genes identified by comparison between the R (recovery) and C (control) groups and between the R (recovery) and S (space) groups. [file Table_2.xlsx]

## Sheet: Recovery vs Control
ProbeUID	ProbeName	GeneName	SystematicName	Description	Ensembl	Entrez	logFC	AveExpr	t	P.Value	adj.P.Val	B	Regulation
7786	A_55_P2027083	Kcnj10	NM_001039484	ref|Mus musculus potassium inwardly-rectifying channel, subfamily J, member 10 (Kcnj10), mRNA [NM_001039484]	ENSMUSG00000044708	16513	-8.66894	12.1609	-55.9638	9.28607e-09	3.97395e-05	9.69266	DOWN
38557	A_51_P149422	Gng13	NM_022422	ref|Mus musculus guanine nucleotide binding protein (G protein), gamma 13 (Gng13), mRNA [NM_022422]	ENSMUSG00000025739	64337	-8.40102	10.5883	-54.8861	1.03267e-08	3.97395e-05	9.64829	DOWN
2797	A_55_P2176565	B3galt5	NM_001122993	ref|Mus musculus UDP-Gal:betaGlcNAc beta 1,3-galactosyltransferase, polypeptide 5 (B3galt5), transcript variant 2, mRNA [NM_001122993]	ENSMUSG00000074892	93961	-9.03339	9.91576	-54.8178	1.03972e-08	3.97395e-05	9.64541	DOWN
20975	A_55_P2178466	Gkn1	NM_025466	ref|Mus musculus gastrokine 1 (Gkn1), mRNA [NM_025466]	ENSMUSG00000030050	66283	-8.99911	9.87183	-54.0404	1.12408e-08	3.97395e-05	9.61206	DOWN
39120	A_55_P1956553	Slc6a5	ENSMUST00000056442	ens|solute carrier family 6 (neurotransmitter transporter, glycine), member 5 [Source:MGI Symbol;Acc:MGI:105090] [ENSMUST00000056442]	ENSMUSG00000039728	104245	-8.15176	9.16582	-52.7271	1.28574e-08	3.97395e-05	9.55319	DOWN
6598	A_55_P1958798	Mobp	NM_008614	ref|Mus musculus myelin-associated oligodendrocytic basic protein (Mobp), transcript variant 1, mRNA [NM_008614]	ENSMUSG00000032517	17433	-8.80291	9.60751	-52.4162	1.32794e-08	3.97395e-05	9.53877	DOWN
37367	A_55_P2070992	Aldoc	NM_009657	ref|Mus musculus aldolase C, fructose-bisphosphate (Aldoc), mRNA [NM_009657]	ENSMUSG00000017390	11676	-7.36637	15.3534	-46.8604	2.44833e-08	3.97395e-05	9.24522	DOWN
13576	A_55_P2031949	Bend6	NM_177235	ref|Mus musculus BEN domain containing 6 (Bend6), mRNA [NM_177235]	ENSMUSG00000042182	320705	-7.83703	11.0723	-46.4102	2.58081e-08	3.97395e-05	9.2181	DOWN
3760	A_55_P2099790	Nefh	NM_010904	ref|Mus musculus neurofilament, heavy polypeptide (Nefh), mRNA [NM_010904]	ENSMUSG00000020396	380684	-7.80901	11.9872	-46.3282	2.60585e-08	3.97395e-05	9.2131	DOWN
11073	A_55_P2164988	Scrt1	NM_130893	ref|Mus musculus scratch homolog 1, zinc finger protein (Drosophila) (Scrt1), mRNA [NM_130893]	ENSMUSG00000048385	170729	-8.97177	11.5286	-46.3018	2.61397e-08	3.97395e-05	9.21149	DOWN
13912	A_55_P2062757	Mag	NM_010758	ref|Mus musculus myelin-associated glycoprotein (Mag), mRNA [NM_010758]	ENSMUSG00000036634	17136	-8.68561	13.1104	-45.8202	2.76752e-08	3.97395e-05	9.1817	DOWN
22723	A_55_P1971604	Bcan	NM_001109758	ref|Mus musculus brevican (Bcan), transcript variant 2, mRNA [NM_001109758]	ENSMUSG00000004892	12032	-8.22182	10.3817	-45.7239	2.79948e-08	3.97395e-05	9.17567	DOWN
34766	A_55_P1991164	Mlc1	NM_133241	ref|Mus musculus megalencephalic leukoencephalopathy with subcortical cysts 1 homolog (human) (Mlc1), mRNA [NM_133241]	ENSMUSG00000035805	170790	-8.93855	11.2409	-45.6665	2.81871e-08	3.97395e-05	9.17206	DOWN
6774	A_55_P2113439	Caln1	NM_021371	ref|Mus musculus calneuron 1 (Caln1), transcript variant 2, mRNA [NM_021371]	ENSMUSG00000060371	140904	-7.34523	10.9468	-44.6993	3.16807e-08	3.97395e-05	9.10977	DOWN
17172	A_52_P8197	Slc17a6	NM_080853	ref|Mus musculus solute carrier family 17 (sodium-dependent inorganic phosphate cotransporter), member 6 (Slc17a6), mRNA [NM_080853]	ENSMUSG00000030500	140919	-8.67555	9.22262	-44.6612	3.18287e-08	3.97395e-05	9.10726	DOWN
7836	A_55_P2069251	Prr18	NM_178774	ref|Mus musculus proline rich region 18 (Prr18), transcript variant 1, mRNA [NM_178774]	ENSMUSG00000055945	320111	-8.81214	10.366	-44.5343	3.2327e-08	3.97395e-05	9.09886	DOWN
11836	A_51_P264656	2900011O08Rik	NM_144518	ref|Mus musculus RIKEN cDNA 2900011O08 gene (2900011O08Rik), mRNA [NM_144518]	ENSMUSG00000044117	67254	-6.81205	10.0606	-44.4346	3.27248e-08	3.97395e-05	9.09223	DOWN
1351	A_51_P366207	Nap1l2	NM_008671	ref|Mus musculus nucleosome assembly protein 1-like 2 (Nap1l2), mRNA [NM_008671]	ENSMUSG00000082229	17954	-7.10669	9.45816	-43.1463	3.84243e-08	4.03995e-05	9.00369	DOWN
2661	A_55_P2036394	Slc39a12	NM_001012305	ref|Mus musculus solute carrier family 39 (zinc transporter), member 12 (Slc39a12), mRNA [NM_001012305]	ENSMUSG00000036949	277468	-6.83683	8.33688	-42.7717	4.02971e-08	4.03995e-05	8.97692	DOWN
36548	A_51_P451957	Cpne6	NM_009947	ref|Mus musculus copine VI (Cpne6), transcript variant 2, mRNA [NM_009947]	ENSMUSG00000022212	12891	-7.37449	10.8014	-42.6613	4.08692e-08	4.03995e-05	8.96894	DOWN
28544	A_55_P2030319	Mcf2	NM_133197	ref|Mus musculus mcf.2 transforming sequence (Mcf2), mRNA [NM_133197]	ENSMUSG00000031139	109904	-6.8716	8.05169	-41.409	4.80833e-08	4.03995e-05	8.87539	DOWN
22012	A_55_P2147566	Tac2	NM_001199971	ref|Mus musculus tachykinin 2 (Tac2), transcript variant 2, mRNA [NM_001199971]	ENSMUSG00000025400	21334	-8.65308	10.0786	-41.0751	5.02551e-08	4.03995e-05	8.84948	DOWN
9651	A_55_P1967500	Nell1	NM_001037906	ref|Mus musculus NEL-like 1 (chicken) (Nell1), mRNA [NM_001037906]	ENSMUSG00000055409	338352	-7.21342	8.6097	-40.9752	5.09271e-08	4.03995e-05	8.84164	DOWN
10328	A_52_P399088	Ankrd34b	NM_175455	ref|Mus musculus ankyrin repeat domain 34B (Ankrd34b), mRNA [NM_175455]	ENSMUSG00000045034	218440	-6.32863	7.30273	-40.8856	5.15384e-08	4.03995e-05	8.83459	DOWN
37718	A_55_P2069850	Plp1	NM_011123	ref|Mus musculus proteolipid protein (myelin) 1 (Plp1), mRNA [NM_011123]	ENSMUSG00000031425	18823	-7.96188	14.9091	-40.7839	5.22437e-08	4.03995e-05	8.82654	DOWN
9356	A_55_P1974243	Dbh	NM_138942	ref|Mus musculus dopamine beta hydroxylase (Dbh), mRNA [NM_138942]	ENSMUSG00000000889	13166	8.72204	6.77021	40.7108	5.27578e-08	4.03995e-05	8.82072	UP
3167	A_55_P1993777	Rbfox3	NM_001039167	ref|Mus musculus RNA binding protein, fox-1 homolog (C. elegans) 3 (Rbfox3), transcript variant 1, mRNA [NM_001039167]	ENSMUSG00000025576	52897	-7.9106	9.1966	-40.1478	5.69214e-08	4.03995e-05	8.77527	DOWN
10593	A_52_P381553	Btbd17	NM_028055	ref|Mus musculus BTB (POZ) domain containing 17 (Btbd17), mRNA [NM_028055]	ENSMUSG00000000202	72014	-7.0822	8.52086	-39.6136	6.12363e-08	4.03995e-05	8.73097	DOWN
21169	A_55_P2015782	Bcas1	NM_029815	ref|Mus musculus breast carcinoma amplified sequence 1 (Bcas1), transcript variant 1, mRNA [NM_029815]	ENSMUSG00000013523	76960	-7.97831	12.6116	-39.1498	6.52985e-08	4.03995e-05	8.69154	DOWN
6831	A_51_P422540	Paqr8	NM_028829	ref|Mus musculus progestin and adipoQ receptor family member VIII (Paqr8), mRNA [NM_028829]	ENSMUSG00000025931	74229	-5.96874	8.65353	-38.524	7.12961e-08	4.03995e-05	8.63689	DOWN
30245	A_51_P356967	Lgi3	NM_145219	ref|Mus musculus leucine-rich repeat LGI family, member 3 (Lgi3), mRNA [NM_145219]	ENSMUSG00000033595	213469	-7.24287	10.2948	-38.4902	7.16391e-08	4.03995e-05	8.63388	DOWN
4363	A_66_P121288	Tceal6	NM_025355	ref|Mus musculus transcription elongation factor A (SII)-like 6 (Tceal6), mRNA [NM_025355]	ENSMUSG00000031409	66104	-6.32315	13.1904	-38.3057	7.35408e-08	4.03995e-05	8.61741	DOWN
6161	A_52_P121342	Nrxn1	NM_020252	ref|Mus musculus neurexin I (Nrxn1), transcript variant 1, mRNA [NM_020252]	ENSMUSG00000024109	18189	-6.37944	10.7149	-38.1246	7.54656e-08	4.03995e-05	8.6011	DOWN
12560	A_55_P2138769	Scn1a	NM_018733	ref|Mus musculus sodium channel, voltage-gated, type I, alpha (Scn1a), mRNA [NM_018733]	ENSMUSG00000064329	20265	-6.00091	8.83788	-38.0724	7.60318e-08	4.03995e-05	8.59636	DOWN
8070	A_51_P107020	Kif5a	NM_001039000	ref|Mus musculus kinesin family member 5A (Kif5a), transcript variant 1, mRNA [NM_001039000]	ENSMUSG00000074657	16572	-5.99902	13.7676	-37.7913	7.91675e-08	4.03995e-05	8.57067	DOWN
22968	A_55_P2044582	Iglon5	NM_001164518	ref|Mus musculus IgLON family member 5 (Iglon5), mRNA [NM_001164518]	ENSMUSG00000013367	210094	-6.12561	12.5126	-37.7679	7.94353e-08	4.03995e-05	8.56851	DOWN
21474	A_51_P461779	Ppp2r2c	NM_172994	ref|Mus musculus protein phosphatase 2 (formerly 2A), regulatory subunit B (PR 52), gamma isoform (Ppp2r2c), mRNA [NM_172994]	ENSMUSG00000029120	269643	-6.11614	11.4688	-37.6651	8.06241e-08	4.03995e-05	8.55902	DOWN
9229	A_52_P296913	Cnnm1	NM_031396	ref|Mus musculus cyclin M1 (Cnnm1), mRNA [NM_031396]	ENSMUSG00000025189	83674	-7.13611	10.2243	-37.3917	8.38908e-08	4.03995e-05	8.53352	DOWN
39227	A_51_P215038	Tmem59l	NM_182991	ref|Mus musculus transmembrane protein 59-like (Tmem59l), mRNA [NM_182991]	ENSMUSG00000035964	67937	-7.04813	13.1578	-37.0984	8.7572e-08	4.03995e-05	8.50576	DOWN
20140	A_55_P1993876	Otud7a	NM_130880	ref|Mus musculus OTU domain containing 7A (Otud7a), mRNA [NM_130880]	ENSMUSG00000033510	170711	-6.25979	8.08052	-36.8164	9.12917e-08	4.03995e-05	8.47868	DOWN
6793	A_55_P2167486	Resp18	NM_009049	ref|Mus musculus regulated endocrine-specific protein 18 (Resp18), mRNA [NM_009049]	ENSMUSG00000033061	19711	-7.23067	11.3657	-36.7559	9.21139e-08	4.03995e-05	8.47282	DOWN
26142	A_55_P2090429	Dync1i1	NM_010063	ref|Mus musculus dynein cytoplasmic 1 intermediate chain 1 (Dync1i1), transcript variant 1, mRNA [NM_010063]	ENSMUSG00000029757	13426	-6.30001	10.5325	-36.5571	9.4878e-08	4.03995e-05	8.45343	DOWN
3372	A_66_P127969	Bcat1	NM_007532	ref|Mus musculus branched chain aminotransferase 1, cytosolic (Bcat1), transcript variant 2, mRNA [NM_007532]	ENSMUSG00000030268	12035	-5.80404	9.05889	-36.5555	9.49004e-08	4.03995e-05	8.45328	DOWN
4145	A_52_P138926	Slc32a1	NM_009508	ref|Mus musculus solute carrier family 32 (GABA vesicular transporter), member 1 (Slc32a1), mRNA [NM_009508]	ENSMUSG00000037771	22348	-7.41805	9.03743	-36.34	9.80089e-08	4.03995e-05	8.43204	DOWN
31968	A_55_P2105472	Omg	NM_019409	ref|Mus musculus oligodendrocyte myelin glycoprotein (Omg), mRNA [NM_019409]	ENSMUSG00000049612	18377	-6.80856	10.5346	-36.3185	9.83259e-08	4.03995e-05	8.4299	DOWN
34291	A_51_P409452	Cldn11	NM_008770	ref|Mus musculus claudin 11 (Cldn11), mRNA [NM_008770]	ENSMUSG00000037625	18417	-8.22538	11.5562	-36.293	9.87025e-08	4.03995e-05	8.42737	DOWN
13819	A_51_P253984	Pcp4	NM_008791	ref|Mus musculus Purkinje cell protein 4 (Pcp4), mRNA [NM_008791]	ENSMUSG00000090223	18546	-7.79233	12.1791	-35.9825	1.03435e-07	4.03995e-05	8.39628	DOWN
25723	A_51_P271311	Slc6a11	NM_172890	ref|Mus musculus solute carrier family 6 (neurotransmitter transporter, GABA), member 11 (Slc6a11), mRNA [NM_172890]	ENSMUSG00000030307	243616	-7.62197	8.1636	-35.9815	1.03451e-07	4.03995e-05	8.39618	DOWN
36642	A_51_P368757	Gabrb1	NM_008069	ref|Mus musculus gamma-aminobutyric acid (GABA) A receptor, subunit beta 1 (Gabrb1), mRNA [NM_008069]	ENSMUSG00000029212	14400	-7.9959	8.21047	-35.9238	1.0436e-07	4.03995e-05	8.39034	DOWN
23669	A_51_P448784	Nrsn1	NM_009513	ref|Mus musculus neurensin 1 (Nrsn1), mRNA [NM_009513]	ENSMUSG00000048978	22360	-5.83557	12.7197	-35.899	1.04753e-07	4.03995e-05	8.38783	DOWN
31152	A_55_P2083168	Necab3	NM_021546	ref|Mus musculus N-terminal EF-hand calcium binding protein 3 (Necab3), mRNA [NM_021546]	ENSMUSG00000027489	56846	-6.11301	10.3984	-35.6823	1.08268e-07	4.03995e-05	8.36573	DOWN
4482	A_52_P31641	Tmem145	NM_183311	ref|Mus musculus transmembrane protein 145 (Tmem145), mRNA [NM_183311]	ENSMUSG00000043843	330485	-6.71159	9.10691	-35.6205	1.09296e-07	4.03995e-05	8.35938	DOWN
21714	A_51_P334689	Uts2	NM_011910	ref|Mus musculus urotensin 2 (Uts2), mRNA [NM_011910]	ENSMUSG00000028963	24111	-9.42763	8.86489	-35.5781	1.10009e-07	4.03995e-05	8.35501	DOWN
29523	A_55_P2042918	Trim37	NM_197987	ref|Mus musculus tripartite motif-containing 37 (Trim37), mRNA [NM_197987]	ENSMUSG00000018548	68729	-5.74734	11.6197	-35.5357	1.10724e-07	4.03995e-05	8.35064	DOWN
36021	A_51_P486543	Grm3	NM_181850	ref|Mus musculus glutamate receptor, metabotropic 3 (Grm3), mRNA [NM_181850]	ENSMUSG00000003974	108069	-5.66141	7.03491	-35.4474	1.12237e-07	4.03995e-05	8.3415	DOWN
16883	A_52_P482251	Gjb6	NM_001010937	ref|Mus musculus gap junction protein, beta 6 (Gjb6), transcript variant 2, mRNA [NM_001010937]	ENSMUSG00000040055	14623	-10.0357	10.0066	-35.3986	1.13083e-07	4.03995e-05	8.33642	DOWN
29125	A_52_P590535	Fbln2	NM_007992	ref|Mus musculus fibulin 2 (Fbln2), transcript variant 1, mRNA [NM_007992]	ENSMUSG00000064080	14115	5.62508	8.98512	35.3411	1.1409e-07	4.03995e-05	8.33043	UP
6546	A_55_P2007500	Tmem151b	NM_001013749	ref|Mus musculus transmembrane protein 151B (Tmem151b), mRNA [NM_001013749]	ENSMUSG00000096847	210573	-5.68362	10.3815	-35.2967	1.14873e-07	4.03995e-05	8.32579	DOWN
14223	A_52_P86116	Serpinb1b	NM_173052	ref|Mus musculus serine (or cysteine) peptidase inhibitor, clade B, member 1b (Serpinb1b), mRNA [NM_173052]	ENSMUSG00000051029	282663	-9.00883	9.15196	-35.2189	1.16263e-07	4.03995e-05	8.31764	DOWN
16827	A_66_P124858	Diras2	NM_001024474	ref|Mus musculus DIRAS family, GTP-binding RAS-like 2 (Diras2), mRNA [NM_001024474]	ENSMUSG00000047842	68203	-6.29125	11.8256	-34.9959	1.20358e-07	4.03995e-05	8.29408	DOWN
39026	A_52_P495565	Efnb3	NM_007911	ref|Mus musculus ephrin B3 (Efnb3), mRNA [NM_007911]	ENSMUSG00000003934	13643	-7.32086	10.7449	-34.988	1.20507e-07	4.03995e-05	8.29323	DOWN
16446	A_55_P2041653	1500009C09Rik	NR_037697	ref|Mus musculus RIKEN cDNA 1500009C09 gene (1500009C09Rik), transcript variant 2, non-coding RNA [NR_037697]	ENSMUSG00000068099	76505	-8.42837	11.8092	-34.6214	1.27626e-07	4.03995e-05	8.25388	DOWN
22819	A_55_P1955851	AI593442	NM_178906	ref|Mus musculus expressed sequence AI593442 (AI593442), transcript variant 2, mRNA [NM_178906]	ENSMUSG00000078307	330941	-5.71523	7.61504	-34.5719	1.28626e-07	4.03995e-05	8.2485	DOWN
8987	A_55_P1997831	Dbndd1	NM_028146	ref|Mus musculus dysbindin (dystrobrevin binding protein 1) domain containing 1 (Dbndd1), transcript variant 1, mRNA [NM_028146]	ENSMUSG00000031970	72185	-5.55534	10.0912	-34.4371	1.31393e-07	4.03995e-05	8.2338	DOWN
4466	A_51_P458852	Ina	ENSMUST00000037636	ens|internexin neuronal intermediate filament protein, alpha [Source:MGI Symbol;Acc:MGI:96568] [ENSMUST00000037636]	ENSMUSG00000034336	226180	-5.55437	11.0694	-34.3843	1.32496e-07	4.03995e-05	8.22802	DOWN
15757	A_55_P2125982	Lrrc4b	NM_198250	ref|Mus musculus leucine rich repeat containing 4B (Lrrc4b), mRNA [NM_198250]	ENSMUSG00000047085	272381	-6.20325	12.5567	-34.2386	1.35596e-07	4.03995e-05	8.21197	DOWN
7224	A_55_P2022569	Pak3	NM_001195049	ref|Mus musculus p21 protein (Cdc42/Rac)-activated kinase 3 (Pak3), transcript variant 5, mRNA [NM_001195049]	ENSMUSG00000031284	18481	-5.49348	10.0027	-34.1403	1.37737e-07	4.03995e-05	8.20107	DOWN
6662	A_55_P1968078	Dpp10	NM_199021	ref|Mus musculus dipeptidylpeptidase 10 (Dpp10), mRNA [NM_199021]	ENSMUSG00000036815	269109	-6.22263	8.13085	-33.9519	1.41954e-07	4.03995e-05	8.18002	DOWN
3209	A_52_P465980	Cplx1	NM_007756	ref|Mus musculus complexin 1 (Cplx1), mRNA [NM_007756]	ENSMUSG00000033615	12889	-7.20983	13.1792	-33.8994	1.43157e-07	4.03995e-05	8.17411	DOWN
8989	A_55_P1976224	Ckb	NM_021273	ref|Mus musculus creatine kinase, brain (Ckb), mRNA [NM_021273]	ENSMUSG00000001270	12709	-6.21345	13.3644	-33.852	1.44251e-07	4.03995e-05	8.16877	DOWN
12298	A_55_P2048937	Kif5c	NM_008449	ref|Mus musculus kinesin family member 5C (Kif5c), mRNA [NM_008449]	ENSMUSG00000026764	16574	-6.38454	12.3666	-33.8131	1.45158e-07	4.03995e-05	8.16437	DOWN
3473	A_55_P1987725	Gria4	NM_001113180	ref|Mus musculus glutamate receptor, ionotropic, AMPA4 (alpha 4) (Gria4), transcript variant 2, mRNA [NM_001113180]	ENSMUSG00000025892	14802	-5.50588	8.81203	-33.6124	1.49943e-07	4.03995e-05	8.14155	DOWN
2559	A_51_P115471	Apol8	ENSMUST00000070911	ens|apolipoprotein L 8 [Source:MGI Symbol;Acc:MGI:2444921] [ENSMUST00000070911]	ENSMUSG00000056656	239552	-5.21928	7.17331	-33.4116	1.54919e-07	4.03995e-05	8.11846	DOWN
3306	A_51_P170463	Gpr17	NM_001025381	ref|Mus musculus G protein-coupled receptor 17 (Gpr17), mRNA [NM_001025381]	ENSMUSG00000052229	574402	-8.57159	9.32809	-33.2378	1.59383e-07	4.03995e-05	8.09828	DOWN
33073	A_55_P2046744	Cspg5	NM_001166273	ref|Mus musculus chondroitin sulfate proteoglycan 5 (Cspg5), transcript variant 2, mRNA [NM_001166273]	ENSMUSG00000032482	29873	-5.71677	10.5596	-33.1068	1.6285e-07	4.03995e-05	8.08294	DOWN
25903	A_51_P305230	Elavl3	NM_010487	ref|Mus musculus ELAV (embryonic lethal, abnormal vision, Drosophila)-like 3 (Hu antigen C) (Elavl3), mRNA [NM_010487]	ENSMUSG00000003410	15571	-6.27416	11.5646	-33.036	1.6476e-07	4.03995e-05	8.07461	DOWN
2121	A_55_P2111508	Ttyh1	NM_021324	ref|Mus musculus tweety homolog 1 (Drosophila) (Ttyh1), transcript variant 2, mRNA [NM_021324]	ENSMUSG00000030428	57776	-6.32087	10.8702	-33.0263	1.65023e-07	4.03995e-05	8.07347	DOWN
10308	A_55_P2103225	Slc25a18	NM_001081048	ref|Mus musculus solute carrier family 25 (mitochondrial carrier), member 18 (Slc25a18), nuclear gene encoding mitochondrial protein, mRNA [NM_001081048]	ENSMUSG00000004902	71803	-7.25497	9.02304	-33.0105	1.65455e-07	4.03995e-05	8.0716	DOWN
34866	A_52_P209944	C130071C03Rik	AK029460	gb|Mus musculus 0 day neonate head cDNA, RIKEN full-length enriched library, clone:4833441G08 product:hypothetical protein, full insert sequence. [AK029460]	ENSMUSG00000050334	320203	-5.81405	7.16287	-32.9806	1.66271e-07	4.03995e-05	8.06807	DOWN
13106	A_55_P2212603	Apba2	NM_007461	ref|Mus musculus amyloid beta (A4) precursor protein-binding, family A, member 2 (Apba2), mRNA [NM_007461]	ENSMUSG00000030519	11784	-5.36738	10.5665	-32.9663	1.66667e-07	4.03995e-05	8.06637	DOWN
9933	A_51_P105068	Lypd6b	NM_027990	ref|Mus musculus LY6/PLAUR domain containing 6B (Lypd6b), mRNA [NM_027990]	ENSMUSG00000026765	71897	-6.42082	8.82741	-32.9443	1.67274e-07	4.03995e-05	8.06377	DOWN
18515	A_51_P374818	Shd	NM_009168	ref|Mus musculus src homology 2 domain-containing transforming protein D (Shd), transcript variant 2, mRNA [NM_009168]	ENSMUSG00000039154	20420	-6.35776	10.6256	-32.9171	1.68027e-07	4.03995e-05	8.06055	DOWN
21452	A_55_P1982699	Gm16442	NM_001167148	ref|Mus musculus predicted gene 16442 (Gm16442), mRNA [NM_001167148]	ENSMUSG00000096152	620401	-6.94599	8.28402	-32.8965	1.68601e-07	4.03995e-05	8.0581	DOWN
37116	A_51_P423518	Amph	NM_175007	ref|Mus musculus amphiphysin (Amph), mRNA [NM_175007]	ENSMUSG00000021314	218038	-5.56312	11.3628	-32.8947	1.6865e-07	4.03995e-05	8.05789	DOWN
21799	A_55_P1968340	Plekhh1	NM_181073	ref|Mus musculus pleckstrin homology domain containing, family H (with MyTH4 domain) member 1 (Plekhh1), mRNA [NM_181073]	ENSMUSG00000060716	211945	-7.24497	10.7769	-32.8317	1.70421e-07	4.03995e-05	8.05039	DOWN
33231	A_51_P258690	Scrg1	NM_009136	ref|Mus musculus scrapie responsive gene 1 (Scrg1), mRNA [NM_009136]	ENSMUSG00000031610	20284	-8.48152	10.1171	-32.7945	1.71476e-07	4.03995e-05	8.04595	DOWN
13510	A_55_P1968858	Cadps	NM_012061	ref|Mus musculus Ca2+-dependent secretion activator (Cadps), transcript variant 1, mRNA [NM_012061]	ENSMUSG00000054423	27062	-5.71654	11.6275	-32.7814	1.7185e-07	4.03995e-05	8.04439	DOWN
9889	A_52_P72965	Unc80	NM_175510	ref|Mus musculus unc-80 homolog (C. elegans) (Unc80), mRNA [NM_175510]	ENSMUSG00000055567	329178	-5.04577	7.79889	-32.7512	1.72716e-07	4.03995e-05	8.04077	DOWN
38330	A_55_P2160910	Faim2	NM_028224	ref|Mus musculus Fas apoptotic inhibitory molecule 2 (Faim2), transcript variant 1, mRNA [NM_028224]	ENSMUSG00000023011	72393	-6.74946	12.5504	-32.5907	1.77398e-07	4.03995e-05	8.02147	DOWN
24877	A_52_P313185	Sv2b	NM_153579	ref|Mus musculus synaptic vesicle glycoprotein 2 b (Sv2b), transcript variant 1, mRNA [NM_153579]	ENSMUSG00000053025	64176	-6.2975	8.01042	-32.5821	1.77655e-07	4.03995e-05	8.02043	DOWN
18631	A_55_P2134092	Brsk1	NM_001003920	ref|Mus musculus BR serine/threonine kinase 1 (Brsk1), transcript variant 1, mRNA [NM_001003920]	ENSMUSG00000035390	381979	-6.18762	12.0327	-32.5542	1.78485e-07	4.03995e-05	8.01705	DOWN
10815	A_66_P139666	Tmem229a	NM_177013	ref|Mus musculus transmembrane protein 229A (Tmem229a), mRNA [NM_177013]	ENSMUSG00000048022	319832	-7.17649	10.1156	-32.4728	1.80936e-07	4.03995e-05	8.00718	DOWN
25052	A_55_P1960351	Cntn1	NM_001159647	ref|Mus musculus contactin 1 (Cntn1), transcript variant 1, mRNA [NM_001159647]	ENSMUSG00000055022	12805	-6.22168	12.3974	-32.3994	1.83179e-07	4.03995e-05	7.99824	DOWN
30399	A_55_P2100485	Epha8	NM_007939	ref|Mus musculus Eph receptor A8 (Epha8), mRNA [NM_007939]	ENSMUSG00000028661	13842	-5.02234	6.95572	-32.3661	1.84209e-07	4.03995e-05	7.99417	DOWN
17026	A_51_P333859	Clvs2	NM_175448	ref|Mus musculus clavesin 2 (Clvs2), mRNA [NM_175448]	ENSMUSG00000019785	215890	-5.25937	7.57211	-32.3115	1.85911e-07	4.03995e-05	7.98748	DOWN
29979	A_51_P386069	Rab9b	NM_176971	ref|Mus musculus RAB9B, member RAS oncogene family (Rab9b), mRNA [NM_176971]	ENSMUSG00000043463	319642	-6.0631	10.0694	-32.0329	1.94886e-07	4.12297e-05	7.95307	DOWN
33844	A_55_P2176145	Rgs17	NM_001161822	ref|Mus musculus regulator of G-protein signaling 17 (Rgs17), transcript variant 1, mRNA [NM_001161822]	ENSMUSG00000019775	56533	-5.7238	10.6723	-32.0194	1.95336e-07	4.12297e-05	7.95138	DOWN
4891	A_51_P256384	Atp2b2	NM_009723	ref|Mus musculus ATPase, Ca++ transporting, plasma membrane 2 (Atp2b2), transcript variant 1, mRNA [NM_009723]	ENSMUSG00000030302	11941	-6.73991	10.7765	-31.9587	1.97365e-07	4.12297e-05	7.9438	DOWN
35725	A_51_P325223	Lin7b	NM_011698	ref|Mus musculus lin-7 homolog B (C. elegans) (Lin7b), mRNA [NM_011698]	ENSMUSG00000003872	22342	-5.93089	9.51863	-31.8117	2.0238e-07	4.12297e-05	7.92536	DOWN
18383	A_51_P393968	Vsx2	NM_007701	ref|Mus musculus visual system homeobox 2 (Vsx2), mRNA [NM_007701]	ENSMUSG00000021239	12677	-5.88674	6.65449	-31.776	2.03623e-07	4.12297e-05	7.92085	DOWN
9807	A_51_P257675	Tspyl4	NM_030203	ref|Mus musculus TSPY-like 4 (Tspyl4), mRNA [NM_030203]	ENSMUSG00000039485	72480	-5.94112	12.1398	-31.7219	2.0552e-07	4.12297e-05	7.91401	DOWN
11328	A_51_P181341	Necab2	NM_054095	ref|Mus musculus N-terminal EF-hand calcium binding protein 2 (Necab2), mRNA [NM_054095]	ENSMUSG00000031837	117148	-7.52722	10.2002	-31.7144	2.05787e-07	4.12297e-05	7.91305	DOWN
24737	A_55_P2113165	Camkk1	NM_018883	ref|Mus musculus calcium/calmodulin-dependent protein kinase kinase 1, alpha (Camkk1), mRNA [NM_018883]	ENSMUSG00000020785	55984	-5.76378	11.5696	-31.5832	2.10482e-07	4.12297e-05	7.89638	DOWN
4961	A_55_P2019457	Eno2	NM_013509	ref|Mus musculus enolase 2, gamma neuronal (Eno2), mRNA [NM_013509]	ENSMUSG00000004267	13807	-6.38878	13.8173	-31.506	2.13307e-07	4.12297e-05	7.88651	DOWN
20688	A_55_P1987650	Ctnnd2	NM_008729	ref|Mus musculus catenin (cadherin associated protein), delta 2 (Ctnnd2), mRNA [NM_008729]	ENSMUSG00000022240	18163	-6.09554	10.4009	-31.4982	2.13595e-07	4.12297e-05	7.88551	DOWN
38058	A_51_P189943	Dscam	NM_031174	ref|Mus musculus Down syndrome cell adhesion molecule (Dscam), mRNA [NM_031174]	ENSMUSG00000050272	13508	-5.52925	8.66509	-31.4009	2.17222e-07	4.12297e-05	7.873	DOWN
14233	A_55_P2129761	Prrt3	NM_172487	ref|Mus musculus proline-rich transmembrane protein 3 (Prrt3), mRNA [NM_172487]	ENSMUSG00000045009	210673	-6.06801	8.33909	-31.3903	2.17621e-07	4.12297e-05	7.87164	DOWN
36370	A_55_P1997211	Diras1	NM_145217	ref|Mus musculus DIRAS family, GTP-binding RAS-like 1 (Diras1), mRNA [NM_145217]	ENSMUSG00000043670	208666	-5.86986	9.35766	-31.3699	2.18393e-07	4.12297e-05	7.86901	DOWN
13716	A_65_P06029	Fam171b	ENSMUST00000051454	ens|family with sequence similarity 171, member B [Source:MGI Symbol;Acc:MGI:2444579] [ENSMUST00000051454]	ENSMUSG00000048388	241520	-5.62009	9.72573	-31.3434	2.19401e-07	4.12297e-05	7.86558	DOWN
12378	A_55_P2005365	Glra1	NM_020492	ref|Mus musculus glycine receptor, alpha 1 subunit (Glra1), mRNA [NM_020492]	ENSMUSG00000000263	14654	-5.8249	7.55604	-31.0146	2.32365e-07	4.12297e-05	7.82268	DOWN
16760	A_52_P62121	Gpr37	NM_010338	ref|Mus musculus G protein-coupled receptor 37 (Gpr37), mRNA [NM_010338]	ENSMUSG00000039904	14763	-6.11163	6.7954	-30.9964	2.33111e-07	4.12297e-05	7.82028	DOWN
8386	A_51_P145132	Mcpt4	NM_010779	ref|Mus musculus mast cell protease 4 (Mcpt4), mRNA [NM_010779]	ENSMUSG00000061068	17227	7.20763	5.75961	30.9838	2.33629e-07	4.12297e-05	7.81861	UP
3037	A_55_P1954693	Tac1	NM_009311	ref|Mus musculus tachykinin 1 (Tac1), mRNA [NM_009311]	ENSMUSG00000061762	21333	-8.20954	8.9459	-30.9762	2.33939e-07	4.12297e-05	7.81762	DOWN
36609	A_55_P2003561	Luzp2	NM_178705	ref|Mus musculus leucine zipper protein 2 (Luzp2), mRNA [NM_178705]	ENSMUSG00000063297	233271	-5.86599	8.06103	-30.9126	2.36572e-07	4.12297e-05	7.80921	DOWN
3658	A_51_P358316	Chga	NM_007693	ref|Mus musculus chromogranin A (Chga), mRNA [NM_007693]	ENSMUSG00000021194	12652	-5.31379	13.1098	-30.8959	2.37268e-07	4.12297e-05	7.807	DOWN
28923	A_55_P2085060	Vgf	NM_001039385	ref|Mus musculus VGF nerve growth factor inducible (Vgf), mRNA [NM_001039385]	ENSMUSG00000037428	381677	-6.24565	11.6349	-30.8606	2.38748e-07	4.12297e-05	7.80232	DOWN
19717	A_55_P1970090	Grin2c	NM_010350	ref|Mus musculus glutamate receptor, ionotropic, NMDA2C (epsilon 3) (Grin2c), mRNA [NM_010350]	ENSMUSG00000020734	14813	-5.9702	7.82766	-30.8083	2.40966e-07	4.12297e-05	7.79535	DOWN
1223	A_51_P145220	Nefm	NM_008691	ref|Mus musculus neurofilament, medium polypeptide (Nefm), mRNA [NM_008691]	ENSMUSG00000022054	18040	-8.1226	11.9835	-30.7886	2.41807e-07	4.12297e-05	7.79273	DOWN
14146	A_55_P2007630	Sez6l2	NM_144926	ref|Mus musculus seizure related 6 homolog like 2 (Sez6l2), mRNA [NM_144926]	ENSMUSG00000030683	233878	-6.72356	13.0224	-30.7405	2.43871e-07	4.12297e-05	7.78631	DOWN
33015	A_52_P265937	Tagln3	NM_019754	ref|Mus musculus transgelin 3 (Tagln3), mRNA [NM_019754]	ENSMUSG00000022658	56370	-5.9094	11.5208	-30.7185	2.44822e-07	4.12297e-05	7.78338	DOWN
30557	A_52_P515880	Vsnl1	NM_012038	ref|Mus musculus visinin-like 1 (Vsnl1), mRNA [NM_012038]	ENSMUSG00000054459	26950	-9.00367	10.361	-30.6389	2.48304e-07	4.12297e-05	7.7727	DOWN
33850	A_55_P2132512	Ngef	NM_001111314	ref|Mus musculus neuronal guanine nucleotide exchange factor (Ngef), transcript variant 1, mRNA [NM_001111314]	ENSMUSG00000026259	53972	-5.24338	10.7622	-30.6105	2.49563e-07	4.12297e-05	7.76887	DOWN
23887	A_55_P2126502	Trhr	NM_013696	ref|Mus musculus thyrotropin releasing hormone receptor (Trhr), mRNA [NM_013696]	ENSMUSG00000038760	22045	-6.35268	7.29424	-30.5946	2.5027e-07	4.12297e-05	7.76673	DOWN
36516	A_55_P2119628	Gnal	NM_177137	ref|Mus musculus guanine nucleotide binding protein, alpha stimulating, olfactory type (Gnal), transcript variant 2, mRNA [NM_177137]	ENSMUSG00000024524	14680	-4.93858	8.97387	-30.5831	2.50782e-07	4.12297e-05	7.76518	DOWN
4902	A_52_P377537	Gabra1	NM_010250	ref|Mus musculus gamma-aminobutyric acid (GABA) A receptor, subunit alpha 1 (Gabra1), mRNA [NM_010250]	ENSMUSG00000010803	14394	-5.24157	8.18227	-30.555	2.5204e-07	4.12297e-05	7.76139	DOWN
24981	A_52_P253044	Syt13	NM_030725	ref|Mus musculus synaptotagmin XIII (Syt13), mRNA [NM_030725]	ENSMUSG00000027220	80976	-6.99863	10.4064	-30.4474	2.56925e-07	4.12297e-05	7.74682	DOWN
340	A_51_P144957	Tram1l1	NM_146140	ref|Mus musculus translocation associated membrane protein 1-like 1 (Tram1l1), mRNA [NM_146140]	ENSMUSG00000044528	229801	-4.82792	8.52747	-30.4129	2.58518e-07	4.12297e-05	7.74212	DOWN
4377	A_55_P2176080	Lrrc4	NM_138682	ref|Mus musculus leucine rich repeat containing 4 (Lrrc4), mRNA [NM_138682]	ENSMUSG00000049939	192198	-5.38798	8.11532	-30.406	2.58837e-07	4.12297e-05	7.74118	DOWN
7242	A_51_P384994	Grik4	NM_175481	ref|Mus musculus glutamate receptor, ionotropic, kainate 4 (Grik4), mRNA [NM_175481]	ENSMUSG00000032017	110637	-5.68203	9.08662	-30.3989	2.59164e-07	4.12297e-05	7.74022	DOWN
34774	A_51_P200517	Rasgef1a	NM_027526	ref|Mus musculus RasGEF domain family, member 1A (Rasgef1a), mRNA [NM_027526]	ENSMUSG00000030134	70727	-5.32956	10.7648	-30.3504	2.6143e-07	4.12297e-05	7.73359	DOWN
8798	A_55_P2056021	Snap91	NM_013669	ref|Mus musculus synaptosomal-associated protein 91 (Snap91), mRNA [NM_013669]	ENSMUSG00000033419	20616	-5.36967	8.6674	-30.2728	2.65098e-07	4.12297e-05	7.72296	DOWN
33494	A_52_P141687	Gpr37l1	NM_134438	ref|Mus musculus G protein-coupled receptor 37-like 1 (Gpr37l1), mRNA [NM_134438]	ENSMUSG00000026424	171469	-5.57485	9.86095	-30.2486	2.66252e-07	4.12297e-05	7.71965	DOWN
34716	A_52_P98614	Slc6a2	NM_009209	ref|Mus musculus solute carrier family 6 (neurotransmitter transporter, noradrenalin), member 2 (Slc6a2), mRNA [NM_009209]	ENSMUSG00000055368	20538	7.38667	5.12626	30.2341	2.66947e-07	4.12297e-05	7.71766	UP
2841	A_51_P508580	Tcf15	NM_009328	ref|Mus musculus transcription factor 15 (Tcf15), mRNA [NM_009328]	ENSMUSG00000068079	21407	5.69272	7.13657	30.2201	2.67622e-07	4.12297e-05	7.71573	UP
6315	A_52_P631547	Cytl1	NM_001081106	ref|Mus musculus cytokine-like 1 (Cytl1), mRNA [NM_001081106]	ENSMUSG00000062329	231162	5.46528	7.48149	30.0089	2.78036e-07	4.15596e-05	7.68649	UP
22277	A_55_P2052281	Rnf208	NM_176834	ref|Mus musculus ring finger protein 208 (Rnf208), mRNA [NM_176834]	ENSMUSG00000044628	68846	-6.66076	12.2402	-29.9893	2.79026e-07	4.15596e-05	7.68376	DOWN
10548	A_52_P671676	Rasgrf1	NM_011245	ref|Mus musculus RAS protein-specific guanine nucleotide-releasing factor 1 (Rasgrf1), transcript variant 1, mRNA [NM_011245]	ENSMUSG00000032356	19417	-7.38422	8.95944	-29.9809	2.7945e-07	4.15596e-05	7.68259	DOWN
36324	A_55_P2130129	Kcnab1	NM_010597	ref|Mus musculus potassium voltage-gated channel, shaker-related subfamily, beta member 1 (Kcnab1), mRNA [NM_010597]	ENSMUSG00000027827	16497	-4.56049	10.5137	-29.9389	2.81593e-07	4.15596e-05	7.67672	DOWN
9836	A_51_P344376	Gpr162	NM_013533	ref|Mus musculus G protein-coupled receptor 162 (Gpr162), mRNA [NM_013533]	ENSMUSG00000038390	14788	-6.6201	11.905	-29.8792	2.84667e-07	4.15596e-05	7.66836	DOWN
23355	A_51_P274259	Ak5	NM_001081277	ref|Mus musculus adenylate kinase 5 (Ak5), mRNA [NM_001081277]	ENSMUSG00000039058	229949	-5.70248	9.00788	-29.8269	2.87391e-07	4.15596e-05	7.66102	DOWN
9539	A_55_P2161026	Slc24a2	NM_001110240	ref|Mus musculus solute carrier family 24 (sodium/potassium/calcium exchanger), member 2 (Slc24a2), transcript variant 2, mRNA [NM_001110240]	ENSMUSG00000037996	76376	-5.34529	8.08972	-29.7707	2.90355e-07	4.15596e-05	7.65311	DOWN
23016	A_55_P2099363	Stac2	NM_146028	ref|Mus musculus SH3 and cysteine rich domain 2 (Stac2), mRNA [NM_146028]	ENSMUSG00000017400	217154	-5.57108	9.65424	-29.7693	2.90432e-07	4.15596e-05	7.6529	DOWN
10023	A_66_P128647	Trim9	NM_001110202	ref|Mus musculus tripartite motif-containing 9 (Trim9), transcript variant 2, mRNA [NM_001110202]	ENSMUSG00000021071	94090	-4.8529	7.8111	-29.7645	2.90689e-07	4.15596e-05	7.65222	DOWN
7136	A_55_P1990314	Elavl4	NM_010488	ref|Mus musculus ELAV (embryonic lethal, abnormal vision, Drosophila)-like 4 (Hu antigen D) (Elavl4), transcript variant 1, mRNA [NM_010488]	ENSMUSG00000028546	15572	-4.61423	8.81534	-29.7559	2.91147e-07	4.15596e-05	7.651	DOWN
13143	A_51_P231630	Zfp239	NM_001001792	ref|Mus musculus zinc finger protein 239 (Zfp239), transcript variant 1, mRNA [NM_001001792]	ENSMUSG00000042097	22685	-5.09152	7.83748	-29.7399	2.91995e-07	4.15596e-05	7.64876	DOWN
29885	A_51_P284608	Cd74	NM_001042605	ref|Mus musculus CD74 antigen (invariant polypeptide of major histocompatibility complex, class II antigen-associated) (Cd74), transcript variant 1, mRNA [NM_001042605]	ENSMUSG00000024610	16149	6.70292	9.39771	29.704	2.93921e-07	4.15596e-05	7.64367	UP
18666	A_66_P102097	ENSMUST00000063754	ENSMUST00000063754	ens|predicted gene 9866 [Source:MGI Symbol;Acc:MGI:3643118] [ENSMUST00000063754]	ENSMUST00000063754	NA	-4.93755	6.67454	-29.5935	2.99943e-07	4.21226e-05	7.62797	DOWN
2216	A_51_P378789	Cxcl13	NM_018866	ref|Mus musculus chemokine (C-X-C motif) ligand 13 (Cxcl13), mRNA [NM_018866]	ENSMUSG00000023078	55985	6.04461	5.74826	29.4518	3.07882e-07	4.29453e-05	7.60769	UP
12191	A_55_P2039210	Cpt1b	NM_009948	ref|Mus musculus carnitine palmitoyltransferase 1b, muscle (Cpt1b), nuclear gene encoding mitochondrial protein, mRNA [NM_009948]	ENSMUSG00000078937	12895	8.16366	8.06732	29.3818	3.11895e-07	4.31728e-05	7.59761	UP
35325	A_55_P2118362	Tmem121	NM_153776	ref|Mus musculus transmembrane protein 121 (Tmem121), mRNA [NM_153776]	ENSMUSG00000049036	69195	-5.74132	8.73701	-29.2495	3.19648e-07	4.31728e-05	7.57845	DOWN
36598	A_51_P339934	Nefl	NM_010910	ref|Mus musculus neurofilament, light polypeptide (Nefl), mRNA [NM_010910]	ENSMUSG00000022055	18039	-7.35336	13.9155	-29.24	3.20213e-07	4.31728e-05	7.57707	DOWN
32490	A_55_P1998872	Slitrk5	NM_198865	ref|Mus musculus SLIT and NTRK-like family, member 5 (Slitrk5), mRNA [NM_198865]	ENSMUSG00000033214	75409	-5.07076	8.19296	-29.2185	3.21498e-07	4.31728e-05	7.57394	DOWN
18864	A_66_P126348	BC030870	NR_033217	ref|Mus musculus cDNA sequence BC030870 (BC030870), non-coding RNA [NR_033217]	ENSMUSG00000074300	407795	-4.68573	13.7922	-29.2013	3.22528e-07	4.31728e-05	7.57143	DOWN
29982	A_55_P1991605	Aplp1	NM_007467	ref|Mus musculus amyloid beta (A4) precursor-like protein 1 (Aplp1), mRNA [NM_007467]	ENSMUSG00000006651	11803	-6.86982	13.8041	-29.1728	3.24248e-07	4.31728e-05	7.56727	DOWN
20073	A_66_P123666	Gdap1l1	NM_144891	ref|Mus musculus ganglioside-induced differentiation-associated protein 1-like 1 (Gdap1l1), mRNA [NM_144891]	ENSMUSG00000017943	228858	-4.95391	10.2982	-29.1654	3.24695e-07	4.31728e-05	7.56619	DOWN
35708	A_55_P2028259	Rhbdf2	NM_172572	ref|Mus musculus rhomboid 5 homolog 2 (Drosophila) (Rhbdf2), transcript variant 1, mRNA [NM_172572]	ENSMUSG00000020806	217344	4.64233	5.93225	29.1399	3.26243e-07	4.31728e-05	7.56247	UP
352	A_66_P106774	Lhfpl3	NM_029990	ref|Mus musculus lipoma HMGIC fusion partner-like 3 (Lhfpl3), transcript variant 1, mRNA [NM_029990]	ENSMUSG00000106379	269629	-5.38715	8.29138	-28.979	3.3622e-07	4.401e-05	7.53883	DOWN
29564	A_52_P124472	Kcnd2	NM_019697	ref|Mus musculus potassium voltage-gated channel, Shal-related family, member 2 (Kcnd2), mRNA [NM_019697]	ENSMUSG00000060882	16508	-6.35592	8.93139	-28.9171	3.40154e-07	4.401e-05	7.52967	DOWN
11570	A_55_P2077517	Arhgef4	ENSMUST00000159021	ens|Rho guanine nucleotide exchange factor (GEF) 4 [Source:MGI Symbol;Acc:MGI:2442507] [ENSMUST00000159021]	ENSMUSG00000037509	226970	-4.7913	8.76632	-28.8876	3.42049e-07	4.401e-05	7.5253	DOWN
28890	A_55_P1963002	Ppfia4	NM_001144855	ref|Mus musculus protein tyrosine phosphatase, receptor type, f polypeptide (PTPRF), interacting protein (liprin), alpha 4 (Ppfia4), mRNA [NM_001144855]	ENSMUSG00000026458	68507	-4.41869	9.13167	-28.8515	3.4438e-07	4.401e-05	7.51994	DOWN
6589	A_55_P2100030	Mdga2	NM_001193266	ref|Mus musculus MAM domain containing glycosylphosphatidylinositol anchor 2 (Mdga2), transcript variant A, mRNA [NM_001193266]	ENSMUSG00000034912	320772	-5.01889	7.32592	-28.8265	3.4601e-07	4.401e-05	7.51622	DOWN
31247	A_55_P2039320	Zfp365	NM_178679	ref|Mus musculus zinc finger protein 365 (Zfp365), mRNA [NM_178679]	ENSMUSG00000037855	216049	-5.85604	10.7032	-28.7858	3.48678e-07	4.401e-05	7.51016	DOWN
26092	A_66_P119457	Hepacam	NM_175189	ref|Mus musculus hepatocyte cell adhesion molecule (Hepacam), mRNA [NM_175189]	ENSMUSG00000046240	72927	-5.9825	7.18241	-28.7715	3.49625e-07	4.401e-05	7.50801	DOWN
31967	A_55_P2129261	Arhgap36	NM_001081123	ref|Mus musculus Rho GTPase activating protein 36 (Arhgap36), mRNA [NM_001081123]	ENSMUSG00000036198	75404	-5.5698	9.12882	-28.7575	3.50551e-07	4.401e-05	7.50592	DOWN
15802	A_51_P429903	Ndp	NM_010883	ref|Mus musculus Norrie disease (pseudoglioma) (human) (Ndp), mRNA [NM_010883]	ENSMUSG00000040138	17986	-4.64478	7.6963	-28.7382	3.51834e-07	4.401e-05	7.50304	DOWN
22062	A_52_P554436	Rwdd2a	NM_027100	ref|Mus musculus RWD domain containing 2A (Rwdd2a), transcript variant 1, mRNA [NM_027100]	ENSMUSG00000032417	69519	-5.208	8.89949	-28.6728	3.56216e-07	4.401e-05	7.49324	DOWN
23664	A_55_P1985990	Slc35f4	NM_029238	ref|Mus musculus solute carrier family 35, member F4 (Slc35f4), mRNA [NM_029238]	ENSMUSG00000021852	75288	-4.96723	7.60535	-28.6359	3.58721e-07	4.401e-05	7.48769	DOWN
25549	A_55_P2151096	Jakmip2	NM_001163637	ref|Mus musculus janus kinase and microtubule interacting protein 2 (Jakmip2), mRNA [NM_001163637]	ENSMUSG00000024502	76217	-5.53194	8.50763	-28.6298	3.59141e-07	4.401e-05	7.48676	DOWN
24913	A_55_P2179572	Slc18a3	NM_021712	ref|Mus musculus solute carrier family 18 (vesicular monoamine), member 3 (Slc18a3), mRNA [NM_021712]	ENSMUSG00000100241	20508	-6.44808	10.8137	-28.6118	3.60369e-07	4.401e-05	7.48406	DOWN
16441	A_55_P2123673	Trnp1	NM_001081156	ref|Mus musculus TMF1-regulated nuclear protein 1 (Trnp1), mRNA [NM_001081156]	ENSMUSG00000056596	69539	-4.7274	12.4037	-28.5232	3.66501e-07	4.401e-05	7.47067	DOWN
26125	A_55_P2032643	Ajap1	NM_001099299	ref|Mus musculus adherens junction associated protein 1 (Ajap1), mRNA [NM_001099299]	ENSMUSG00000039546	230959	-5.84343	10.2306	-28.4397	3.72394e-07	4.401e-05	7.45798	DOWN
8529	A_55_P2122130	ENSMUST00000098496	ENSMUST00000098496	ens|cDNA sequence BC007180 [Source:MGI Symbol;Acc:MGI:2684418] [ENSMUST00000098496]	ENSMUST00000098496	NA	-6.20502	7.70879	-28.4325	3.72901e-07	4.401e-05	7.4569	DOWN
5352	A_55_P1988994	ENSMUST00000103314	ENSMUST00000103314	ens|predicted gene, 16798 [Source:MGI Symbol;Acc:MGI:4439722] [ENSMUST00000103314]	ENSMUST00000103314	NA	5.15628	4.85376	28.4002	3.7522e-07	4.401e-05	7.45196	UP
30866	A_55_P1983046	Plch1	NM_001177732	ref|Mus musculus phospholipase C, eta 1 (Plch1), transcript variant 3, mRNA [NM_001177732]	ENSMUSG00000036834	269437	-4.81168	7.11753	-28.3963	3.75496e-07	4.401e-05	7.45137	DOWN
34427	A_52_P522372	Aard	NM_175503	ref|Mus musculus alanine and arginine rich domain containing protein (Aard), mRNA [NM_175503]	ENSMUSG00000068522	239435	-6.37788	7.32283	-28.3408	3.79516e-07	4.401e-05	7.44288	DOWN
2896	A_51_P250797	Glrb	NM_010298	ref|Mus musculus glycine receptor, beta subunit (Glrb), mRNA [NM_010298]	ENSMUSG00000028020	14658	-6.78782	9.02557	-28.3232	3.80799e-07	4.401e-05	7.44019	DOWN
13671	A_55_P2043862	Stmn1	NM_019641	ref|Mus musculus stathmin 1 (Stmn1), mRNA [NM_019641]	ENSMUSG00000028832	16765	-4.71669	13.8978	-28.3056	3.82088e-07	4.401e-05	7.43749	DOWN
35879	A_51_P282594	Svop	NM_026805	ref|Mus musculus SV2 related protein (Svop), mRNA [NM_026805]	ENSMUSG00000042078	68666	-5.52239	10.407	-28.3001	3.82495e-07	4.401e-05	7.43664	DOWN
31116	A_51_P284486	Gstm2	NM_008183	ref|Mus musculus glutathione S-transferase, mu 2 (Gstm2), mRNA [NM_008183]	ENSMUSG00000040562	14863	5.74443	8.12163	28.2994	3.82544e-07	4.401e-05	7.43654	UP
38250	A_66_P117730	Hapln1	NM_013500	ref|Mus musculus hyaluronan and proteoglycan link protein 1 (Hapln1), mRNA [NM_013500]	ENSMUSG00000021613	12950	-4.67322	7.17559	-28.2608	3.85394e-07	4.401e-05	7.43061	DOWN
12532	A_51_P513062	B630019K06Rik	NM_175327	ref|Mus musculus RIKEN cDNA B630019K06 gene (B630019K06Rik), mRNA [NM_175327]	ENSMUSG00000052364	102941	-5.09348	10.396	-28.2314	3.87585e-07	4.401e-05	7.42608	DOWN
31414	A_55_P2017894	Syt2	NM_009307	ref|Mus musculus synaptotagmin II (Syt2), mRNA [NM_009307]	ENSMUSG00000026452	20980	-5.36397	7.72843	-28.2017	3.89803e-07	4.401e-05	7.42151	DOWN
13318	A_55_P2004213	Gprasp2	NM_001163015	ref|Mus musculus G protein-coupled receptor associated sorting protein 2 (Gprasp2), transcript variant 1, mRNA [NM_001163015]	ENSMUSG00000072966	245607	-6.37248	12.3109	-28.1887	3.90784e-07	4.401e-05	7.4195	DOWN
39202	A_55_P2156731	H2-Eb1	NM_010382	ref|Mus musculus histocompatibility 2, class II antigen E beta (H2-Eb1), mRNA [NM_010382]	ENSMUSG00000060586	14969	5.68557	9.78232	28.1692	3.92261e-07	4.401e-05	7.41648	UP
19504	A_52_P144310	Gad1	NM_008077	ref|Mus musculus glutamic acid decarboxylase 1 (Gad1), mRNA [NM_008077]	ENSMUSG00000070880	14415	-7.65529	9.21591	-28.023	4.03519e-07	4.43984e-05	7.39378	DOWN
3011	A_52_P52303	Gfap	NM_001131020	ref|Mus musculus glial fibrillary acidic protein (Gfap), transcript variant 1, mRNA [NM_001131020]	ENSMUSG00000020932	14580	-8.74558	9.25482	-28.0114	4.04429e-07	4.43984e-05	7.39197	DOWN
5606	A_52_P539310	Serp2	NM_001160326	ref|Mus musculus stress-associated endoplasmic reticulum protein family member 2 (Serp2), transcript variant 1, mRNA [NM_001160326]	ENSMUSG00000052584	72661	-5.63902	11.8887	-27.9857	4.06448e-07	4.43984e-05	7.38797	DOWN
33957	A_55_P1972963	Pcsk2	NM_008792	ref|Mus musculus proprotein convertase subtilisin/kexin type 2 (Pcsk2), mRNA [NM_008792]	ENSMUSG00000027419	18549	-6.00919	10.0077	-27.955	4.08885e-07	4.43984e-05	7.38316	DOWN
3837	A_55_P2156304	Kcnj16	NM_010604	ref|Mus musculus potassium inwardly-rectifying channel, subfamily J, member 16 (Kcnj16), mRNA [NM_010604]	ENSMUSG00000051497	16517	-6.07759	9.27283	-27.9466	4.09555e-07	4.43984e-05	7.38184	DOWN
28622	A_55_P2176792	Sh3gl3	NM_017400	ref|Mus musculus SH3-domain GRB2-like 3 (Sh3gl3), mRNA [NM_017400]	ENSMUSG00000030638	20408	-4.9468	10.4631	-27.9403	4.10055e-07	4.43984e-05	7.38086	DOWN
34292	A_52_P400355	3110035E14Rik	NM_178399	ref|Mus musculus RIKEN cDNA 3110035E14 gene (3110035E14Rik), mRNA [NM_178399]	ENSMUSG00000067879	76982	-6.71057	8.24539	-27.9053	4.12856e-07	4.43984e-05	7.37538	DOWN
16467	A_55_P1998169	Spef2	NM_177123	ref|Mus musculus sperm flagellar 2 (Spef2), mRNA [NM_177123]	ENSMUSG00000072663	320277	-6.04194	7.91411	-27.9044	4.12929e-07	4.43984e-05	7.37523	DOWN
36207	A_51_P368210	Phyhip	NM_145981	ref|Mus musculus phytanoyl-CoA hydroxylase interacting protein (Phyhip), mRNA [NM_145981]	ENSMUSG00000003469	105653	-5.25068	9.15018	-27.8375	4.18357e-07	4.4749e-05	7.3647	DOWN
4102	A_55_P2040951	Actc1	NM_009608	ref|Mus musculus actin, alpha, cardiac muscle 1 (Actc1), mRNA [NM_009608]	ENSMUSG00000068614	11464	9.00498	7.20265	27.7502	4.25564e-07	4.52489e-05	7.35091	UP
2363	A_51_P404377	Rnd2	NM_009708	ref|Mus musculus Rho family GTPase 2 (Rnd2), mRNA [NM_009708]	ENSMUSG00000001313	11858	-5.71367	11.0508	-27.7281	4.27414e-07	4.52489e-05	7.3474	DOWN
29775	A_51_P102459	Jph3	NM_020605	ref|Mus musculus junctophilin 3 (Jph3), mRNA [NM_020605]	ENSMUSG00000025318	57340	-6.06869	10.8047	-27.5457	4.43031e-07	4.65961e-05	7.31831	DOWN
15716	A_55_P1968916	Cbln1	BC051956	gb|Mus musculus cerebellin 1 precursor protein, mRNA (cDNA clone IMAGE:5684648), partial cds. [BC051956]	ENSMUSG00000031654	12404	-4.86094	6.68671	-27.5032	4.46758e-07	4.65961e-05	7.3115	DOWN
10492	A_52_P365660	Lrrc4c	NM_178725	ref|Mus musculus leucine rich repeat containing 4C (Lrrc4c), mRNA [NM_178725]	ENSMUSG00000050587	241568	-5.13213	9.28502	-27.4924	4.47714e-07	4.65961e-05	7.30976	DOWN
27608	A_51_P295410	Nap1l5	NM_021432	ref|Mus musculus nucleosome assembly protein 1-like 5 (Nap1l5), mRNA [NM_021432]	ENSMUSG00000055430	58243	-6.12071	10.735	-27.476	4.49168e-07	4.65961e-05	7.30713	DOWN
12691	A_55_P2289707	Cacnb4	NM_001037099	ref|Mus musculus calcium channel, voltage-dependent, beta 4 subunit (Cacnb4), transcript variant 1, mRNA [NM_001037099]	ENSMUSG00000017412	12298	-4.9969	9.00927	-27.3952	4.56416e-07	4.69585e-05	7.29409	DOWN
35484	A_55_P1956267	Syt11	NM_018804	ref|Mus musculus synaptotagmin XI (Syt11), mRNA [NM_018804]	ENSMUSG00000068923	229521	-5.24281	12.9939	-27.3865	4.57211e-07	4.69585e-05	7.29267	DOWN
37592	A_55_P2143499	Pgbd5	NM_171824	ref|Mus musculus piggyBac transposable element derived 5 (Pgbd5), mRNA [NM_171824]	ENSMUSG00000050751	209966	-5.59273	10.0011	-27.3186	4.63421e-07	4.73287e-05	7.28167	DOWN
38724	A_52_P681391	G0s2	NM_008059	ref|Mus musculus G0/G1 switch gene 2 (G0s2), mRNA [NM_008059]	ENSMUSG00000009633	14373	4.50261	10.3726	27.2972	4.654e-07	4.73287e-05	7.27819	UP
20197	A_51_P161248	Scg3	NM_009130	ref|Mus musculus secretogranin III (Scg3), transcript variant 1, mRNA [NM_009130]	ENSMUSG00000032181	20255	-5.79225	12.5638	-27.1801	4.76407e-07	4.82106e-05	7.25907	DOWN
35200	A_66_P102903	Fez1	NM_183171	ref|Mus musculus fasciculation and elongation protein zeta 1 (zygin I) (Fez1), mRNA [NM_183171]	ENSMUSG00000032118	235180	-5.65516	9.25371	-27.1269	4.81504e-07	4.84887e-05	7.25035	DOWN
22128	A_55_P2081785	Slc45a1	NM_173774	ref|Mus musculus solute carrier family 45, member 1 (Slc45a1), mRNA [NM_173774]	ENSMUSG00000039838	242773	-5.24191	9.37641	-27.0389	4.90084e-07	4.9113e-05	7.23585	DOWN
19108	A_52_P327381	Fndc4	NM_022424	ref|Mus musculus fibronectin type III domain containing 4 (Fndc4), mRNA [NM_022424]	ENSMUSG00000038552	64339	-5.15511	10.2864	-26.9509	4.98847e-07	4.91471e-05	7.22128	DOWN
20513	A_55_P2074085	Gimap8	NM_001077410	ref|Mus musculus GTPase, IMAP family member 8 (Gimap8), transcript variant 2, mRNA [NM_001077410]	ENSMUSG00000064262	243374	4.73123	7.35922	26.9371	5.00234e-07	4.91471e-05	7.21899	UP
14919	A_51_P229498	Lrfn2	NM_027452	ref|Mus musculus leucine rich repeat and fibronectin type III domain containing 2 (Lrfn2), mRNA [NM_027452]	ENSMUSG00000040490	70530	-5.63283	7.48958	-26.8961	5.044e-07	4.91471e-05	7.21216	DOWN
31379	A_55_P2036813	Hist3h2ba	NM_030082	ref|Mus musculus histone cluster 3, H2ba (Hist3h2ba), mRNA [NM_030082]	ENSMUSG00000056895	78303	-5.06173	10.5466	-26.8604	5.08051e-07	4.91471e-05	7.20621	DOWN
16917	A_65_P12251	Fut9	NM_010243	ref|Mus musculus fucosyltransferase 9 (Fut9), mRNA [NM_010243]	ENSMUSG00000055373	14348	-4.54937	6.71266	-26.8515	5.08969e-07	4.91471e-05	7.20473	DOWN
13228	A_55_P2154480	Ctxn2	NM_001162934	ref|Mus musculus cortexin 2 (Ctxn2), mRNA [NM_001162934]	ENSMUSG00000074872	381418	-5.64541	9.58008	-26.836	5.10561e-07	4.91471e-05	7.20215	DOWN
14975	A_51_P161636	Kng2	NM_201375	ref|Mus musculus kininogen 2 (Kng2), transcript variant 1, mRNA [NM_201375]	ENSMUSG00000060459	385643	7.44112	6.03842	26.8176	5.12473e-07	4.91471e-05	7.19906	UP
4659	A_51_P204080	Hk2	NM_013820	ref|Mus musculus hexokinase 2 (Hk2), mRNA [NM_013820]	ENSMUSG00000000628	15277	6.30749	8.2345	26.8019	5.14106e-07	4.91471e-05	7.19644	UP
20609	A_51_P442642	Cadm2	NM_178721	ref|Mus musculus cell adhesion molecule 2 (Cadm2), transcript variant 1, mRNA [NM_178721]	ENSMUSG00000064115	239857	-4.12326	7.21957	-26.7967	5.14645e-07	4.91471e-05	7.19557	DOWN
23503	A_51_P146044	Ccdc92	NM_144819	ref|Mus musculus coiled-coil domain containing 92 (Ccdc92), mRNA [NM_144819]	ENSMUSG00000037979	215707	-4.98299	12.1362	-26.7533	5.19204e-07	4.91471e-05	7.18828	DOWN
6234	A_55_P2077188	Stxbp1	NM_001113569	ref|Mus musculus syntaxin binding protein 1 (Stxbp1), transcript variant 1, mRNA [NM_001113569]	ENSMUSG00000026797	20910	-4.88326	11.8481	-26.7065	5.24164e-07	4.91471e-05	7.18042	DOWN
35840	A_51_P389216	Fam131b	NM_029528	ref|Mus musculus family with sequence similarity 131, member B (Fam131b), transcript variant a, mRNA [NM_029528]	ENSMUSG00000029861	76156	-5.27828	7.87399	-26.7025	5.24593e-07	4.91471e-05	7.17974	DOWN
20310	A_51_P145948	Neto1	NM_144946	ref|Mus musculus neuropilin (NRP) and tolloid (TLL)-like 1 (Neto1), mRNA [NM_144946]	ENSMUSG00000050321	246317	-4.07875	7.67529	-26.6812	5.26876e-07	4.91471e-05	7.17615	DOWN
28778	A_52_P686785	Lyve1	NM_053247	ref|Mus musculus lymphatic vessel endothelial hyaluronan receptor 1 (Lyve1), mRNA [NM_053247]	ENSMUSG00000030787	114332	5.41117	6.06319	26.6758	5.27458e-07	4.91471e-05	7.17523	UP
3464	A_55_P1977503	Htr2c	NM_008312	ref|Mus musculus 5-hydroxytryptamine (serotonin) receptor 2C (Htr2c), mRNA [NM_008312]	ENSMUSG00000041380	15560	-4.50553	6.39922	-26.6427	5.31028e-07	4.91471e-05	7.16964	DOWN
5904	A_52_P201206	Scrn1	NM_027268	ref|Mus musculus secernin 1 (Scrn1), mRNA [NM_027268]	ENSMUSG00000019124	69938	-4.08594	11.3843	-26.6123	5.34328e-07	4.91471e-05	7.16451	DOWN
34381	A_51_P285779	Asphd2	NM_028386	ref|Mus musculus aspartate beta-hydroxylase domain containing 2 (Asphd2), mRNA [NM_028386]	ENSMUSG00000029348	72898	-5.16118	10.788	-26.6087	5.34718e-07	4.91471e-05	7.1639	DOWN
2733	A_55_P1963889	Nrxn3	NM_001198587	ref|Mus musculus neurexin III (Nrxn3), transcript variant 1, mRNA [NM_001198587]	ENSMUSG00000066392	18191	-5.30665	7.36723	-26.5985	5.35836e-07	4.91471e-05	7.16217	DOWN
12060	A_55_P1964965	Gm1673	NM_001033458	ref|Mus musculus predicted gene 1673 (Gm1673), mRNA [NM_001033458]	ENSMUSG00000070858	381633	-4.6947	11.9567	-26.589	5.36881e-07	4.91471e-05	7.16055	DOWN
22658	A_55_P2072656	Ckmt1	NM_009897	ref|Mus musculus creatine kinase, mitochondrial 1, ubiquitous (Ckmt1), nuclear gene encoding mitochondrial protein, mRNA [NM_009897]	ENSMUSG00000000308	12716	-4.94932	14.0343	-26.5784	5.38038e-07	4.91471e-05	7.15877	DOWN
5439	A_52_P432245	Cbln4	NM_175631	ref|Mus musculus cerebellin 4 precursor protein (Cbln4), mRNA [NM_175631]	ENSMUSG00000067578	228942	-5.60852	5.22692	-26.5546	5.40674e-07	4.91704e-05	7.15471	DOWN
38708	A_55_P1953266	Maneal	NM_001007573	ref|Mus musculus mannosidase, endo-alpha-like (Maneal), mRNA [NM_001007573]	ENSMUSG00000042763	215090	-4.93318	9.6968	-26.5252	5.4393e-07	4.92495e-05	7.14972	DOWN
25275	A_51_P438841	Ctnna2	NM_009819	ref|Mus musculus catenin (cadherin associated protein), alpha 2 (Ctnna2), transcript variant 2, mRNA [NM_009819]	ENSMUSG00000063063	12386	-4.66168	9.39077	-26.4758	5.49476e-07	4.95344e-05	7.14129	DOWN
32253	A_51_P199778	ENSMUST00000035939	ENSMUST00000035939	ens|RIKEN cDNA 9330171B17 gene [Source:MGI Symbol;Acc:MGI:3696417] [ENSMUST00000035939]	ENSMUST00000035939	NA	-4.15489	6.6212	-26.4324	5.54391e-07	4.97602e-05	7.13388	DOWN
11892	A_55_P1973838	Slc6a9	NM_008135	ref|Mus musculus solute carrier family 6 (neurotransmitter transporter, glycine), member 9 (Slc6a9), mRNA [NM_008135]	ENSMUSG00000028542	14664	-4.40628	13.9121	-26.3963	5.58525e-07	4.9857e-05	7.12769	DOWN
37261	A_51_P304478	Fam155a	NM_173446	ref|Mus musculus family with sequence similarity 155, member A (Fam155a), mRNA [NM_173446]	ENSMUSG00000079157	270028	-6.20085	9.46348	-26.3809	5.60299e-07	4.9857e-05	7.12504	DOWN
26553	A_55_P2146560	H2-Ab1	NM_207105	ref|Mus musculus histocompatibility 2, class II antigen A, beta 1 (H2-Ab1), mRNA [NM_207105]	ENSMUSG00000073421	14961	6.29682	9.61592	26.3526	5.63578e-07	4.99335e-05	7.12018	UP
24840	A_52_P425667	Adcyap1	NM_009625	ref|Mus musculus adenylate cyclase activating polypeptide 1 (Adcyap1), mRNA [NM_009625]	ENSMUSG00000024256	11516	-7.18681	8.20705	-26.2876	5.71194e-07	4.99363e-05	7.10898	DOWN
36163	A_55_P1973818	Mmel1	NM_013783	ref|Mus musculus membrane metallo-endopeptidase-like 1 (Mmel1), mRNA [NM_013783]	ENSMUSG00000058183	27390	-4.26048	6.98225	-26.2797	5.72126e-07	4.99363e-05	7.10761	DOWN
7421	A_52_P101399	Tmem130	NM_177735	ref|Mus musculus transmembrane protein 130 (Tmem130), mRNA [NM_177735]	ENSMUSG00000043388	243339	-6.69922	12.4691	-26.2723	5.72999e-07	4.99363e-05	7.10634	DOWN
7314	A_55_P1998578	Ifitm2	NM_030694	ref|Mus musculus interferon induced transmembrane protein 2 (Ifitm2), mRNA [NM_030694]	ENSMUSG00000060591	80876	4.04786	9.00157	26.2664	5.73697e-07	4.99363e-05	7.10532	UP
2514	A_52_P370392	Mapk8ip2	NM_021921	ref|Mus musculus mitogen-activated protein kinase 8 interacting protein 2 (Mapk8ip2), mRNA [NM_021921]	ENSMUSG00000022619	60597	-5.74154	11.2183	-26.2495	5.75704e-07	4.99363e-05	7.1024	DOWN
5574	A_51_P272993	Ntm	NM_172290	ref|Mus musculus neurotrimin (Ntm), mRNA [NM_172290]	ENSMUSG00000059974	235106	-6.25572	8.17591	-26.2104	5.80389e-07	5.0132e-05	7.09562	DOWN
9344	A_51_P343215	Ube2ql1	NM_001145162	ref|Mus musculus ubiquitin-conjugating enzyme E2Q family-like 1 (Ube2ql1), mRNA [NM_001145162]	ENSMUSG00000052981	76980	-4.81993	7.71407	-26.1735	5.84845e-07	5.02114e-05	7.08922	DOWN
28991	A_55_P1962771	Cyfip2	NM_133769	ref|Mus musculus cytoplasmic FMR1 interacting protein 2 (Cyfip2), mRNA [NM_133769]	ENSMUSG00000020340	76884	-4.98289	12.4932	-26.1558	5.87002e-07	5.02114e-05	7.08614	DOWN
8020	A_55_P2003541	Nrcam	NM_176930	ref|Mus musculus neuron-glia-CAM-related cell adhesion molecule (Nrcam), transcript variant 1, mRNA [NM_176930]	ENSMUSG00000020598	319504	-5.47453	10.7636	-26.1427	5.88605e-07	5.02114e-05	7.08385	DOWN
8732	A_55_P2084413	Lrrtm2	NM_178005	ref|Mus musculus leucine rich repeat transmembrane neuronal 2 (Lrrtm2), mRNA [NM_178005]	ENSMUSG00000071862	107065	-4.64918	6.74147	-26.0552	5.99426e-07	5.08312e-05	7.06857	DOWN
18711	A_55_P2391015	A330015K06Rik	AK039287	gb|Mus musculus adult male spinal cord cDNA, RIKEN full-length enriched library, clone:A330015K06 product:unclassifiable, full insert sequence. [AK039287]	ENSMUSG00000104093	102637797	-4.49669	5.62942	-26.0442	6.00795e-07	5.08312e-05	7.06666	DOWN
7066	A_52_P607683	Ppm1e	NM_177167	ref|Mus musculus protein phosphatase 1E (PP2C domain containing) (Ppm1e), mRNA [NM_177167]	ENSMUSG00000046442	320472	-5.19861	9.86386	-25.9921	6.07365e-07	5.11774e-05	7.05752	DOWN
17774	A_55_P1998591	Fam43b	NM_001081672	ref|Mus musculus family with sequence similarity 43, member B (Fam43b), mRNA [NM_001081672]	ENSMUSG00000078235	625638	-6.07744	8.71047	-25.9408	6.13926e-07	5.12946e-05	7.04848	DOWN
18582	A_55_P1967746	Tmem151a	NM_001001885	ref|Mus musculus transmembrane protein 151A (Tmem151a), mRNA [NM_001001885]	ENSMUSG00000061451	381199	-4.09823	8.23412	-25.9318	6.15084e-07	5.12946e-05	7.04689	DOWN
4918	A_51_P263290	Galnt9	NM_198306	ref|Mus musculus UDP-N-acetyl-alpha-D-galactosamine:polypeptide N-acetylgalactosaminyltransferase 9 (Galnt9), transcript variant A, mRNA [NM_198306]	ENSMUSG00000033316	231605	-6.06542	8.4528	-25.9231	6.16211e-07	5.12946e-05	7.04535	DOWN
24191	A_55_P2102769	Abca8a	NM_153145	ref|Mus musculus ATP-binding cassette, sub-family A (ABC1), member 8a (Abca8a), mRNA [NM_153145]	ENSMUSG00000041828	217258	4.59369	5.63057	25.8834	6.21356e-07	5.15152e-05	7.03835	UP
15841	A_55_P1981929	Scg5	NM_009162	ref|Mus musculus secretogranin V (Scg5), mRNA [NM_009162]	ENSMUSG00000023236	20394	-5.90884	12.6054	-25.7239	6.4257e-07	5.29863e-05	7.01	DOWN
7188	A_55_P2093433	Kcnk12	NM_199251	ref|Mus musculus potassium channel, subfamily K, member 12 (Kcnk12), mRNA [NM_199251]	ENSMUSG00000050138	210741	-4.8147	7.28252	-25.703	6.45415e-07	5.29863e-05	7.00627	DOWN
21126	A_55_P2016526	Lrrc49	NM_145616	ref|Mus musculus leucine rich repeat containing 49 (Lrrc49), transcript variant 2, mRNA [NM_145616]	ENSMUSG00000047766	102747	-4.39203	8.44459	-25.6798	6.48595e-07	5.29863e-05	7.00211	DOWN
7451	A_51_P227679	Gabrb2	NM_008070	ref|Mus musculus gamma-aminobutyric acid (GABA) A receptor, subunit beta 2 (Gabrb2), mRNA [NM_008070]	ENSMUSG00000007653	14401	-5.21035	9.35461	-25.6594	6.51393e-07	5.29863e-05	6.99846	DOWN
16321	A_55_P1997609	Crhr1	NM_007762	ref|Mus musculus corticotropin releasing hormone receptor 1 (Crhr1), mRNA [NM_007762]	ENSMUSG00000018634	12921	-5.01574	7.03412	-25.6555	6.51933e-07	5.29863e-05	6.99776	DOWN
36909	A_51_P283016	Slc1a6	NM_009200	ref|Mus musculus solute carrier family 1 (high affinity aspartate/glutamate transporter), member 6 (Slc1a6), mRNA [NM_009200]	ENSMUSG00000005357	20513	-6.65834	9.66582	-25.5964	6.6015e-07	5.34437e-05	6.98715	DOWN
11724	A_51_P117165	6330409D20Rik	ENSMUST00000009695	ens|RIKEN cDNA 6330409D20 gene [Source:MGI Symbol;Acc:MGI:1917980] [ENSMUST00000009695]	ENSMUSG00000009551	70730	-4.96391	8.37196	-25.552	6.6641e-07	5.36192e-05	6.97914	DOWN
9687	A_55_P2009561	Pex5l	NM_021483	ref|Mus musculus peroxisomal biogenesis factor 5-like (Pex5l), transcript variant 1, mRNA [NM_021483]	ENSMUSG00000027674	58869	-4.57153	7.39127	-25.519	6.71098e-07	5.36192e-05	6.97319	DOWN
29225	A_55_P2148016	ENSMUST00000141582	ENSMUST00000141582	ens|cDNA sequence BC039966 [Source:MGI Symbol;Acc:MGI:3039570] [ENSMUST00000141582]	ENSMUST00000141582	NA	-5.04515	6.63582	-25.5119	6.72123e-07	5.36192e-05	6.97189	DOWN
29231	A_55_P1979833	Cited1	NM_007709	ref|Mus musculus Cbp/p300-interacting transactivator with Glu/Asp-rich carboxy-terminal domain 1 (Cited1), mRNA [NM_007709]	ENSMUSG00000051159	12705	-4.04489	9.64815	-25.5078	6.72708e-07	5.36192e-05	6.97115	DOWN
11842	A_52_P164286	Dnm3	NM_001038619	ref|Mus musculus dynamin 3 (Dnm3), transcript variant 1, mRNA [NM_001038619]	ENSMUSG00000040265	103967	-4.77564	9.35709	-25.4325	6.83598e-07	5.39423e-05	6.95749	DOWN
21577	A_52_P589391	Doc2a	NM_010069	ref|Mus musculus double C2, alpha (Doc2a), mRNA [NM_010069]	ENSMUSG00000052301	13446	-5.64572	9.2047	-25.3996	6.88417e-07	5.39423e-05	6.95151	DOWN
28566	A_52_P413395	Sln	NM_025540	ref|Mus musculus sarcolipin (Sln), mRNA [NM_025540]	ENSMUSG00000042045	66402	8.39529	9.09241	25.397	6.88799e-07	5.39423e-05	6.95104	UP
23712	A_55_P2019483	Ndrg4	NM_001195006	ref|Mus musculus N-myc downstream regulated gene 4 (Ndrg4), transcript variant A, mRNA [NM_001195006]	ENSMUSG00000036564	234593	-4.75194	14.5396	-25.3944	6.89189e-07	5.39423e-05	6.95056	DOWN
33417	A_55_P1992490	Scg2	NM_009129	ref|Mus musculus secretogranin II (Scg2), mRNA [NM_009129]	ENSMUSG00000050711	20254	-5.24152	11.9835	-25.39	6.89826e-07	5.39423e-05	6.94977	DOWN
10240	A_51_P213334	Hdac11	NM_144919	ref|Mus musculus histone deacetylase 11 (Hdac11), mRNA [NM_144919]	ENSMUSG00000034245	232232	-4.4761	9.27694	-25.2917	7.0452e-07	5.43767e-05	6.9318	DOWN
10485	A_55_P2043182	Gimap6	NM_153175	ref|Mus musculus GTPase, IMAP family member 6 (Gimap6), mRNA [NM_153175]	ENSMUSG00000047867	231931	3.93995	9.24003	25.2808	7.06174e-07	5.43767e-05	6.92979	UP
20801	A_51_P173692	Lingo4	NM_177250	ref|Mus musculus leucine rich repeat and Ig domain containing 4 (Lingo4), mRNA [NM_177250]	ENSMUSG00000044505	320747	-5.02831	10.9782	-25.2697	7.07852e-07	5.43767e-05	6.92777	DOWN
20094	A_52_P143037	Gabra5	NM_176942	ref|Mus musculus gamma-aminobutyric acid (GABA) A receptor, subunit alpha 5 (Gabra5), mRNA [NM_176942]	ENSMUSG00000055078	110886	-6.4327	7.63736	-25.2628	7.0891e-07	5.43767e-05	6.92649	DOWN
34619	A_55_P2028773	Slc22a17	NM_021551	ref|Mus musculus solute carrier family 22 (organic cation transporter), member 17 (Slc22a17), mRNA [NM_021551]	ENSMUSG00000022199	59049	-5.20426	14.282	-25.2545	7.10167e-07	5.43767e-05	6.92498	DOWN
38746	A_51_P403564	Lhx5	NM_008499	ref|Mus musculus LIM homeobox protein 5 (Lhx5), mRNA [NM_008499]	ENSMUSG00000029595	16873	-5.34076	6.8938	-25.2479	7.11185e-07	5.43767e-05	6.92375	DOWN
2917	A_55_P2093168	Rell2	BC038500	gb|Mus musculus RELT-like 2, mRNA (cDNA clone MGC:47374 IMAGE:4481989), complete cds. [BC038500]	ENSMUSG00000044024	225392	-4.80661	9.31627	-25.1952	7.19295e-07	5.47939e-05	6.91406	DOWN
38303	A_52_P320261	Cpa2	NM_001024698	ref|Mus musculus carboxypeptidase A2, pancreatic (Cpa2), mRNA [NM_001024698]	ENSMUSG00000071553	232680	-4.92987	8.46791	-25.1704	7.23151e-07	5.48034e-05	6.90948	DOWN
2611	A_55_P2079079	Cd19	NM_009844	ref|Mus musculus CD19 antigen (Cd19), mRNA [NM_009844]	ENSMUSG00000030724	12478	4.71478	6.03618	25.1395	7.28e-07	5.48034e-05	6.90376	UP
8897	A_55_P2073338	Syn1	NM_013680	ref|Mus musculus synapsin I (Syn1), transcript variant a, mRNA [NM_013680]	ENSMUSG00000037217	20964	-5.38564	12.6346	-25.132	7.29168e-07	5.48034e-05	6.90239	DOWN
465	A_55_P2008053	Dlg4	NM_007864	ref|Mus musculus discs, large homolog 4 (Drosophila) (Dlg4), transcript variant 1, mRNA [NM_007864]	ENSMUSG00000020886	13385	-4.72356	8.78863	-25.1249	7.30294e-07	5.48034e-05	6.90107	DOWN
22335	A_52_P160005	Pcyt1b	NM_211138	ref|Mus musculus phosphate cytidylyltransferase 1, choline, beta isoform (Pcyt1b), transcript variant 1, mRNA [NM_211138]	ENSMUSG00000035246	236899	-4.76801	7.4845	-25.0626	7.40203e-07	5.48034e-05	6.88951	DOWN
25193	A_51_P221510	Fam81a	NM_029784	ref|Mus musculus family with sequence similarity 81, member A (Fam81a), mRNA [NM_029784]	ENSMUSG00000032224	76886	-3.88604	6.64799	-25.046	7.42867e-07	5.48034e-05	6.88643	DOWN
4166	A_66_P121495	Psat1	NM_001205339	ref|Mus musculus phosphoserine aminotransferase 1 (Psat1), transcript variant 2, mRNA [NM_001205339]	ENSMUSG00000024640	107272	-4.36095	9.73993	-25.0395	7.43913e-07	5.48034e-05	6.88522	DOWN
26109	A_51_P385697	Mgat3	NM_010795	ref|Mus musculus mannoside acetylglucosaminyltransferase 3 (Mgat3), mRNA [NM_010795]	ENSMUSG00000042428	17309	-4.82591	8.71168	-24.9774	7.54015e-07	5.48034e-05	6.87364	DOWN
3686	A_52_P602847	Glycam1	NM_008134	ref|Mus musculus glycosylation dependent cell adhesion molecule 1 (Glycam1), mRNA [NM_008134]	ENSMUSG00000022491	14663	4.93433	5.87323	24.9706	7.55128e-07	5.48034e-05	6.87237	UP
18506	A_55_P2158306	Kndc1	NM_177261	ref|Mus musculus kinase non-catalytic C-lobe domain (KIND) containing 1 (Kndc1), mRNA [NM_177261]	ENSMUSG00000066129	76484	-4.94536	6.97798	-24.9646	7.56124e-07	5.48034e-05	6.87123	DOWN
18600	A_55_P2000613	Slc6a1	NM_178703	ref|Mus musculus solute carrier family 6 (neurotransmitter transporter, GABA), member 1 (Slc6a1), mRNA [NM_178703]	ENSMUSG00000030310	232333	-6.56548	8.71492	-24.9562	7.57509e-07	5.48034e-05	6.86966	DOWN
26103	A_55_P2072233	Zcchc12	NM_028325	ref|Mus musculus zinc finger, CCHC domain containing 12 (Zcchc12), mRNA [NM_028325]	ENSMUSG00000036699	72693	-5.0174	11.4295	-24.9518	7.58235e-07	5.48034e-05	6.86884	DOWN
26615	A_55_P2000434	Skor1	NM_172446	ref|Mus musculus SKI family transcriptional corepressor 1 (Skor1), transcript variant 1, mRNA [NM_172446]	ENSMUSG00000022245	207667	-5.69866	8.41528	-24.9468	7.59053e-07	5.48034e-05	6.86791	DOWN
5960	A_51_P124254	Col4a1	NM_009931	ref|Mus musculus collagen, type IV, alpha 1 (Col4a1), mRNA [NM_009931]	ENSMUSG00000031502	12826	4.15238	8.63869	24.9448	7.59391e-07	5.48034e-05	6.86753	UP
21612	A_52_P403246	B230217C12Rik	NM_001080935	ref|Mus musculus RIKEN cDNA B230217C12 gene (B230217C12Rik), mRNA [NM_001080935]	ENSMUSG00000050538	68127	-4.72459	8.25522	-24.9344	7.61113e-07	5.48034e-05	6.86558	DOWN
19051	A_52_P202142	Sv2a	NM_022030	ref|Mus musculus synaptic vesicle glycoprotein 2 a (Sv2a), mRNA [NM_022030]	ENSMUSG00000038486	64051	-6.46784	10.4405	-24.9296	7.61895e-07	5.48034e-05	6.8647	DOWN
10106	A_51_P217498	Slc2a4	NM_009204	ref|Mus musculus solute carrier family 2 (facilitated glucose transporter), member 4 (Slc2a4), mRNA [NM_009204]	ENSMUSG00000018566	20528	5.00684	12.0947	24.8358	7.77661e-07	5.57431e-05	6.84706	UP
35121	A_51_P361220	Fzd4	NM_008055	ref|Mus musculus frizzled homolog 4 (Drosophila) (Fzd4), mRNA [NM_008055]	ENSMUSG00000049791	14366	4.71592	9.77805	24.7812	7.87002e-07	5.60259e-05	6.83675	UP
12922	A_55_P2074425	Ralyl	NM_178631	ref|Mus musculus RALY RNA binding protein-like (Ralyl), transcript variant 1, mRNA [NM_178631]	ENSMUSG00000039717	76897	-4.46022	6.66028	-24.762	7.90319e-07	5.60259e-05	6.83312	DOWN
23299	A_52_P596375	Cckbr	NM_007627	ref|Mus musculus cholecystokinin B receptor (Cckbr), mRNA [NM_007627]	ENSMUSG00000030898	12426	-4.72515	6.13095	-24.7309	7.95732e-07	5.60259e-05	6.82723	DOWN
31607	A_52_P467726	Nsg1	NM_010942	ref|Mus musculus neuron specific gene family member 1 (Nsg1), mRNA [NM_010942]	ENSMUSG00000029126	18196	-4.87545	13.2173	-24.7182	7.97945e-07	5.60259e-05	6.82483	DOWN
4766	A_55_P2128591	Klk6	NM_011177	ref|Mus musculus kallikrein related-peptidase 6 (Klk6), transcript variant 1, mRNA [NM_011177]	ENSMUSG00000050063	19144	-8.5126	9.8529	-24.7139	7.98701e-07	5.60259e-05	6.82401	DOWN
16991	A_55_P2007981	Fmn2	NM_019445	ref|Mus musculus formin 2 (Fmn2), mRNA [NM_019445]	ENSMUSG00000028354	54418	-4.30354	8.84201	-24.7023	8.00749e-07	5.60259e-05	6.8218	DOWN
38413	A_55_P2026572	Fam189a1	NM_183087	ref|Mus musculus family with sequence similarity 189, member A1 (Fam189a1), mRNA [NM_183087]	ENSMUSG00000030518	70638	-6.32943	7.59016	-24.6734	8.0585e-07	5.60259e-05	6.8163	DOWN
34595	A_51_P346938	Lrg1	NM_029796	ref|Mus musculus leucine-rich alpha-2-glycoprotein 1 (Lrg1), mRNA [NM_029796]	ENSMUSG00000037095	76905	5.63856	9.21017	24.6598	8.08263e-07	5.60259e-05	6.81372	UP
36407	A_55_P2164619	Clec2l	NM_001101507	ref|Mus musculus C-type lectin domain family, member L (Clec2l), mRNA [NM_001101507]	ENSMUSG00000079598	665180	-5.14101	8.10248	-24.6566	8.08835e-07	5.60259e-05	6.8131	DOWN
14801	A_55_P2108948	Gjc3	NM_080450	ref|Mus musculus gap junction protein, gamma 3 (Gjc3), mRNA [NM_080450]	ENSMUSG00000056966	118446	-4.72534	8.05556	-24.6503	8.09952e-07	5.60259e-05	6.81191	DOWN
23848	A_52_P220879	Tgm2	NM_009373	ref|Mus musculus transglutaminase 2, C polypeptide (Tgm2), mRNA [NM_009373]	ENSMUSG00000037820	21817	4.06945	10.4515	24.6419	8.11458e-07	5.60259e-05	6.8103	UP
6366	A_55_P2110502	Zcchc18	NM_001035510	ref|Mus musculus zinc finger, CCHC domain containing 18 (Zcchc18), transcript variant 1, mRNA [NM_001035510]	ENSMUSG00000031428	66995	-4.50621	9.00125	-24.6206	8.15284e-07	5.61012e-05	6.80623	DOWN
14973	A_55_P2077083	Tmem132e	NM_023438	ref|Mus musculus transmembrane protein 132E (Tmem132e), mRNA [NM_023438]	ENSMUSG00000020701	270893	-4.68137	9.67875	-24.5957	8.1977e-07	5.61012e-05	6.80147	DOWN
27795	A_52_P373575	A530058N18Rik	NR_028423	ref|Mus musculus RIKEN cDNA A530058N18 gene (A530058N18Rik), non-coding RNA [NR_028423]	ENSMUSG00000087694	320846	-4.70904	6.78161	-24.5905	8.20702e-07	5.61012e-05	6.80049	DOWN
25594	A_51_P502437	Cacna2d3	NM_009785	ref|Mus musculus calcium channel, voltage-dependent, alpha2/delta subunit 3 (Cacna2d3), mRNA [NM_009785]	ENSMUSG00000021991	12294	-5.52056	9.58366	-24.5297	8.31813e-07	5.66731e-05	6.78883	DOWN
3498	A_51_P205779	Cd5l	NM_009690	ref|Mus musculus CD5 antigen-like (Cd5l), mRNA [NM_009690]	ENSMUSG00000015854	11801	5.34526	5.90353	24.4976	8.37753e-07	5.68901e-05	6.78265	UP
8462	A_51_P137094	Sall2	NM_015772	ref|Mus musculus sal-like 2 (Drosophila) (Sall2), mRNA [NM_015772]	ENSMUSG00000049532	50524	-4.45379	9.68047	-24.4289	8.50612e-07	5.75739e-05	6.76941	DOWN
15881	A_55_P2150966	Npas1	NM_008718	ref|Mus musculus neuronal PAS domain protein 1 (Npas1), mRNA [NM_008718]	ENSMUSG00000001988	18142	-3.94121	6.4904	-24.4085	8.54486e-07	5.76471e-05	6.76546	DOWN
5500	A_55_P2427900	Unc13c	NM_001081153	ref|Mus musculus unc-13 homolog C (C. elegans) (Unc13c), mRNA [NM_001081153]	ENSMUSG00000062151	208898	-6.91388	7.62466	-24.3934	8.57347e-07	5.76517e-05	6.76255	DOWN
32518	A_52_P523516	Hapln2	NM_022031	ref|Mus musculus hyaluronan and proteoglycan link protein 2 (Hapln2), mRNA [NM_022031]	ENSMUSG00000004894	73940	-7.081	8.00571	-24.3576	8.64216e-07	5.7925e-05	6.7556	DOWN
14105	A_51_P486681	Ap3b2	NM_021492	ref|Mus musculus adaptor-related protein complex 3, beta 2 subunit (Ap3b2), mRNA [NM_021492]	ENSMUSG00000062444	11775	-3.78744	9.21647	-24.3196	8.71572e-07	5.82289e-05	6.74822	DOWN
17778	A_52_P531731	Grin3a	ENSMUST00000093859	ens|glutamate receptor ionotropic, NMDA3A [Source:MGI Symbol;Acc:MGI:1933206] [ENSMUST00000093859]	ENSMUSG00000039579	242443	-5.11595	7.1717	-24.3039	8.74625e-07	5.82444e-05	6.74517	DOWN
29207	A_51_P495462	Gad2	NM_008078	ref|Mus musculus glutamic acid decarboxylase 2 (Gad2), mRNA [NM_008078]	ENSMUSG00000026787	14417	-6.96094	9.28362	-24.2023	8.94733e-07	5.93918e-05	6.72533	DOWN
20895	A_55_P1999102	Pi16	NM_023734	ref|Mus musculus peptidase inhibitor 16 (Pi16), mRNA [NM_023734]	ENSMUSG00000024011	74116	5.75109	9.93636	24.1413	9.07071e-07	5.97352e-05	6.71335	UP
24004	A_55_P2062437	Begain	NM_001163175	ref|Mus musculus brain-enriched guanylate kinase-associated (Begain), mRNA [NM_001163175]	ENSMUSG00000040867	380785	-5.81246	11.3548	-24.1366	9.08037e-07	5.97352e-05	6.71242	DOWN
3634	A_55_P2000943	Nrip3	NM_020610	ref|Mus musculus nuclear receptor interacting protein 3 (Nrip3), mRNA [NM_020610]	ENSMUSG00000034825	78593	-4.66331	10.8877	-24.1339	9.08585e-07	5.97352e-05	6.71189	DOWN
10636	A_55_P2132596	Pcdh10	NM_011043	ref|Mus musculus protocadherin 10 (Pcdh10), transcript variant 4, mRNA [NM_011043]	ENSMUSG00000049100	18526	-4.81935	8.05452	-24.0769	9.20318e-07	6.0185e-05	6.70066	DOWN
29686	A_52_P260696	Arnt2	NM_007488	ref|Mus musculus aryl hydrocarbon receptor nuclear translocator 2 (Arnt2), mRNA [NM_007488]	ENSMUSG00000015709	11864	-5.99969	7.71517	-24.0724	9.21259e-07	6.0185e-05	6.69976	DOWN
1614	A_51_P218953	Zfp536	NM_172385	ref|Mus musculus zinc finger protein 536 (Zfp536), mRNA [NM_172385]	ENSMUSG00000043456	243937	-4.03102	9.94688	-24.0291	9.30311e-07	6.05847e-05	6.69119	DOWN
11902	A_55_P2017694	Gprc5c	NM_001110337	ref|Mus musculus G protein-coupled receptor, family C, group 5, member C (Gprc5c), transcript variant 1, mRNA [NM_001110337]	ENSMUSG00000051043	70355	3.83598	6.43282	23.9553	9.45967e-07	6.14105e-05	6.67654	UP
39048	A_51_P259603	Adcyap1r1	NM_007407	ref|Mus musculus adenylate cyclase activating polypeptide 1 receptor 1 (Adcyap1r1), transcript variant 1, mRNA [NM_007407]	ENSMUSG00000029778	11517	-4.25561	9.6649	-23.9059	9.56604e-07	6.1627e-05	6.66671	DOWN
34457	A_52_P671132	Dner	NM_152915	ref|Mus musculus delta/notch-like EGF-related receptor (Dner), mRNA [NM_152915]	ENSMUSG00000036766	227325	-5.39451	9.13696	-23.9052	9.56762e-07	6.1627e-05	6.66657	DOWN
34180	A_55_P2181341	Ecel1	NM_021306	ref|Mus musculus endothelin converting enzyme-like 1 (Ecel1), mRNA [NM_021306]	ENSMUSG00000026247	13599	-4.92885	10.9307	-23.8802	9.62208e-07	6.1627e-05	6.66157	DOWN
20041	A_55_P1964348	Gdpd2	NM_023608	ref|Mus musculus glycerophosphodiester phosphodiesterase domain containing 2 (Gdpd2), mRNA [NM_023608]	ENSMUSG00000019359	71584	-5.23817	8.98497	-23.8616	9.66295e-07	6.1627e-05	6.65785	DOWN
8815	A_55_P2106335	Sstr3	NM_009218	ref|Mus musculus somatostatin receptor 3 (Sstr3), mRNA [NM_009218]	ENSMUSG00000044933	20607	-6.06737	7.75883	-23.8536	9.6805e-07	6.1627e-05	6.65625	DOWN
10113	A_52_P622850	Hes5	NM_010419	ref|Mus musculus hairy and enhancer of split 5 (Drosophila) (Hes5), mRNA [NM_010419]	ENSMUSG00000048001	15208	-4.13511	8.65992	-23.8439	9.70188e-07	6.1627e-05	6.65431	DOWN
5311	A_66_P123582	Mog	NM_010814	ref|Mus musculus myelin oligodendrocyte glycoprotein (Mog), mRNA [NM_010814]	ENSMUSG00000076439	17441	-5.32524	9.70495	-23.8439	9.70198e-07	6.1627e-05	6.6543	DOWN
33384	A_52_P188593	ENSMUST00000059428	ENSMUST00000059428	ens|predicted gene 447 [Source:MGI Symbol;Acc:MGI:2685293] [ENSMUST00000059428]	ENSMUST00000059428	NA	-3.92104	8.27574	-23.7893	9.82342e-07	6.22069e-05	6.64334	DOWN
1229	A_55_P2132756	Cacna1g	NM_009783	ref|Mus musculus calcium channel, voltage-dependent, T type, alpha 1G subunit (Cacna1g), transcript variant 1, mRNA [NM_009783]	ENSMUSG00000020866	12291	-4.35199	7.85259	-23.7347	9.9465e-07	6.27938e-05	6.63235	DOWN
30693	A_55_P2080860	Cmtm5	NM_026066	ref|Mus musculus CKLF-like MARVEL transmembrane domain containing 5 (Cmtm5), mRNA [NM_026066]	ENSMUSG00000040759	67272	-5.95163	11.4422	-23.706	1.00121e-06	6.29257e-05	6.62655	DOWN
33228	A_55_P1982319	Ndst3	NM_031186	ref|Mus musculus N-deacetylase/N-sulfotransferase (heparan glucosaminyl) 3 (Ndst3), mRNA [NM_031186]	ENSMUSG00000027977	83398	-4.81037	6.99413	-23.6899	1.0049e-06	6.29257e-05	6.6233	DOWN
33825	A_51_P464900	Gabbr1	NM_019439	ref|Mus musculus gamma-aminobutyric acid (GABA) B receptor, 1 (Gabbr1), mRNA [NM_019439]	ENSMUSG00000024462	54393	-4.3312	9.22914	-23.6856	1.00588e-06	6.29257e-05	6.62244	DOWN
9149	A_55_P2113160	Mal	NM_010762	ref|Mus musculus myelin and lymphocyte protein, T-cell differentiation protein (Mal), transcript variant 1, mRNA [NM_010762]	ENSMUSG00000027375	17153	-6.52183	13.0221	-23.6714	1.00917e-06	6.29405e-05	6.61956	DOWN
1890	A_52_P211949	Rph3a	NM_011286	ref|Mus musculus rabphilin 3A (Rph3a), mRNA [NM_011286]	ENSMUSG00000029608	19894	-6.98304	9.33129	-23.6411	1.01621e-06	6.31888e-05	6.61341	DOWN
21595	A_51_P170562	Cpn2	NM_027904	ref|Mus musculus carboxypeptidase N, polypeptide 2 (Cpn2), mRNA [NM_027904]	ENSMUSG00000023176	71756	4.47316	4.97246	23.6204	1.02105e-06	6.32684e-05	6.6092	UP
5286	A_52_P337326	Kcnc3	NM_008422	ref|Mus musculus potassium voltage gated channel, Shaw-related subfamily, member 3 (Kcnc3), mRNA [NM_008422]	ENSMUSG00000062785	16504	-4.65029	7.78799	-23.6094	1.02362e-06	6.32684e-05	6.60698	DOWN
1406	A_52_P420504	Acta2	NM_007392	ref|Mus musculus actin, alpha 2, smooth muscle, aorta (Acta2), mRNA [NM_007392]	ENSMUSG00000035783	11475	6.09455	9.47635	23.5914	1.02786e-06	6.32992e-05	6.60332	UP
9784	A_51_P361448	Scara5	NM_028903	ref|Mus musculus scavenger receptor class A, member 5 (putative) (Scara5), transcript variant 1, mRNA [NM_028903]	ENSMUSG00000022032	71145	4.14687	6.07737	23.5813	1.03025e-06	6.32992e-05	6.60127	UP
6279	A_55_P2173183	Cdk5r1	NM_009871	ref|Mus musculus cyclin-dependent kinase 5, regulatory subunit 1 (p35) (Cdk5r1), mRNA [NM_009871]	ENSMUSG00000048895	12569	-4.49117	10.5488	-23.5539	1.03679e-06	6.33543e-05	6.59567	DOWN
2462	A_55_P2082434	Btbd11	NM_028709	ref|Mus musculus BTB (POZ) domain containing 11 (Btbd11), transcript variant 1, mRNA [NM_028709]	ENSMUSG00000020042	74007	-4.33855	10.4671	-23.5518	1.03729e-06	6.33543e-05	6.59524	DOWN
4277	A_55_P1954061	Nrxn2	NM_001205234	ref|Mus musculus neurexin II (Nrxn2), transcript variant 1, mRNA [NM_001205234]	ENSMUSG00000033768	18190	-4.52524	11.3008	-23.4927	1.05152e-06	6.40037e-05	6.58316	DOWN
5184	A_55_P2020286	Tmem179	NM_178915	ref|Mus musculus transmembrane protein 179 (Tmem179), mRNA [NM_178915]	ENSMUSG00000054013	104885	-4.30396	12.9114	-23.4616	1.0591e-06	6.40037e-05	6.57678	DOWN
108	A_51_P426270	Mgp	NM_008597	ref|Mus musculus matrix Gla protein (Mgp), mRNA [NM_008597]	ENSMUSG00000030218	17313	4.17105	11.2159	23.4604	1.0594e-06	6.40037e-05	6.57654	UP
984	A_55_P1955733	Ptpn5	ENSMUST00000130381	ens|protein tyrosine phosphatase, non-receptor type 5 [Source:MGI Symbol;Acc:MGI:97807] [ENSMUST00000130381]	ENSMUSG00000030854	19259	-3.67587	8.87502	-23.4566	1.06032e-06	6.40037e-05	6.57576	DOWN
17275	A_51_P358894	Ttc9b	NM_028417	ref|Mus musculus tetratricopeptide repeat domain 9B (Ttc9b), mRNA [NM_028417]	ENSMUSG00000007944	73032	-5.23086	9.55451	-23.4363	1.06532e-06	6.41178e-05	6.57159	DOWN
14823	A_52_P539692	Cacng2	NM_007583	ref|Mus musculus calcium channel, voltage-dependent, gamma subunit 2 (Cacng2), mRNA [NM_007583]	ENSMUSG00000019146	12300	-3.81211	6.36975	-23.4052	1.07302e-06	6.43934e-05	6.56519	DOWN
6978	A_55_P2103746	Cdh12	NM_001008420	ref|Mus musculus cadherin 12 (Cdh12), mRNA [NM_001008420]	ENSMUSG00000040452	215654	-3.6773	7.06142	-23.3613	1.08401e-06	6.48645e-05	6.55613	DOWN
37005	A_66_P125161	ENSMUST00000143859	ENSMUST00000143859	ens|RIKEN cDNA 1700057H15 gene [Source:MGI Symbol;Acc:MGI:1925710] [ENSMUST00000143859]	ENSMUST00000143859	NA	-8.83285	10.8178	-23.3208	1.09425e-06	6.51577e-05	6.54777	DOWN
17223	A_55_P2087429	ENSMUST00000103393	ENSMUST00000103393	ens|immunoglobulin kappa variable 6-15 [Source:MGI Symbol;Acc:MGI:1330831] [ENSMUST00000103393]	ENSMUST00000103393	NA	5.17691	4.87307	23.3064	1.09792e-06	6.51577e-05	6.54479	UP
4941	A_55_P2011600	Gpr101	NM_001033360	ref|Mus musculus G protein-coupled receptor 101 (Gpr101), mRNA [NM_001033360]	ENSMUSG00000036357	245424	-5.61664	7.69291	-23.3046	1.09838e-06	6.51577e-05	6.54441	DOWN
6918	A_51_P140690	Stmn3	NM_009133	ref|Mus musculus stathmin-like 3 (Stmn3), mRNA [NM_009133]	ENSMUSG00000027581	20262	-5.68559	13.5005	-23.2446	1.11383e-06	6.58852e-05	6.53196	DOWN
14366	A_52_P1008476	Pou3f3	NM_008900	ref|Mus musculus POU domain, class 3, transcription factor 3 (Pou3f3), mRNA [NM_008900]	ENSMUSG00000045515	18993	-5.01371	6.28338	-23.2231	1.11945e-06	6.60283e-05	6.52748	DOWN
4367	A_55_P2170978	Ankrd13d	NM_026720	ref|Mus musculus ankyrin repeat domain 13 family, member D (Ankrd13d), mRNA [NM_026720]	ENSMUSG00000005986	68423	-4.01039	10.4732	-23.1387	1.14178e-06	6.71534e-05	6.50984	DOWN
12633	A_51_P411917	Gata6	NM_010258	ref|Mus musculus GATA binding protein 6 (Gata6), mRNA [NM_010258]	ENSMUSG00000005836	14465	5.99589	5.1224	23.0664	1.1613e-06	6.81077e-05	6.49468	UP
33291	A_52_P317820	Fbxo41	NM_001001160	ref|Mus musculus F-box protein 41 (Fbxo41), mRNA [NM_001001160]	ENSMUSG00000047013	330369	-5.2565	7.80669	-23.0275	1.17199e-06	6.85398e-05	6.48648	DOWN
3802	A_52_P307739	Sox2	NM_011443	ref|Mus musculus SRY-box containing gene 2 (Sox2), mRNA [NM_011443]	ENSMUSG00000074637	20674	-4.50949	6.75445	-23.0073	1.17757e-06	6.86716e-05	6.48223	DOWN
6576	A_55_P2085905	Anpep	NM_008486	ref|Mus musculus alanyl (membrane) aminopeptidase (Anpep), mRNA [NM_008486]	ENSMUSG00000039062	16790	4.64575	7.95268	22.9924	1.18172e-06	6.87196e-05	6.47907	UP
9013	A_55_P1978642	Wasf1	NM_031877	ref|Mus musculus WASP family 1 (Wasf1), mRNA [NM_031877]	ENSMUSG00000019831	83767	-4.20407	9.71583	-22.8334	1.22704e-06	7.09819e-05	6.44529	DOWN
31048	A_51_P212420	Lama4	NM_010681	ref|Mus musculus laminin, alpha 4 (Lama4), mRNA [NM_010681]	ENSMUSG00000019846	16775	4.5264	7.57815	22.8209	1.23068e-06	7.09819e-05	6.44262	UP
21381	A_51_P391291	Gng3	NM_010316	ref|Mus musculus guanine nucleotide binding protein (G protein), gamma 3 (Gng3), mRNA [NM_010316]	ENSMUSG00000071658	14704	-5.35295	13.2982	-22.8131	1.23298e-06	7.09819e-05	6.44095	DOWN
31386	A_55_P2057469	Caskin1	NM_027937	ref|Mus musculus CASK interacting protein 1 (Caskin1), mRNA [NM_027937]	ENSMUSG00000033597	268932	-5.06789	7.81067	-22.8083	1.23438e-06	7.09819e-05	6.43992	DOWN
38990	A_51_P176365	Gimap5	NM_175035	ref|Mus musculus GTPase, IMAP family member 5 (Gimap5), mRNA [NM_175035]	ENSMUSG00000043505	317757	3.5976	5.6439	22.7737	1.24457e-06	7.1282e-05	6.43252	UP
7363	A_51_P397468	Rundc3a	NM_016759	ref|Mus musculus RUN domain containing 3A (Rundc3a), mRNA [NM_016759]	ENSMUSG00000006575	51799	-5.33312	10.9454	-22.7608	1.24839e-06	7.1282e-05	6.42976	DOWN
6659	A_55_P2031272	Lhx3	NM_001039653	ref|Mus musculus LIM homeobox protein 3 (Lhx3), mRNA [NM_001039653]	ENSMUSG00000026934	16871	-4.53225	6.68002	-22.7539	1.25046e-06	7.1282e-05	6.42827	DOWN
483	A_51_P456465	Cldn10	NM_021386	ref|Mus musculus claudin 10 (Cldn10), transcript variant b, mRNA [NM_021386]	ENSMUSG00000022132	58187	-4.9364	9.9204	-22.7383	1.25512e-06	7.1282e-05	6.42492	DOWN
4057	A_51_P390937	ENSMUST00000103320	ENSMUST00000103320	ens|predicted gene, 16939 [Source:MGI Symbol;Acc:MGI:4439863] [ENSMUST00000103320]	ENSMUST00000103320	NA	4.94989	5.51787	22.7325	1.25686e-06	7.1282e-05	6.42367	UP
18994	A_55_P2010871	Daam2	NM_001008231	ref|Mus musculus dishevelled associated activator of morphogenesis 2 (Daam2), mRNA [NM_001008231]	ENSMUSG00000040260	76441	-3.7435	11.7334	-22.7165	1.26166e-06	7.13579e-05	6.42024	DOWN
15070	A_55_P2047111	Nell2	ENSMUST00000023090	ens|NEL-like 2 (chicken) [Source:MGI Symbol;Acc:MGI:1858510] [ENSMUST00000023090]	ENSMUSG00000022454	54003	-3.69558	5.88147	-22.6715	1.2753e-06	7.1724e-05	6.41054	DOWN
16681	A_55_P2142334	Ly6h	NM_011837	ref|Mus musculus lymphocyte antigen 6 complex, locus H (Ly6h), transcript variant 1, mRNA [NM_011837]	ENSMUSG00000022577	23934	-7.67176	10.7169	-22.6613	1.2784e-06	7.1724e-05	6.40835	DOWN
8464	A_55_P2117699	Pak7	NM_172858	ref|Mus musculus p21 protein (Cdc42/Rac)-activated kinase 7 (Pak7), mRNA [NM_172858]	ENSMUSG00000039913	241656	-3.90907	6.67454	-22.6608	1.27855e-06	7.1724e-05	6.40824	DOWN
17608	A_52_P571746	Sh2d5	NM_001099631	ref|Mus musculus SH2 domain containing 5 (Sh2d5), mRNA [NM_001099631]	ENSMUSG00000045349	230863	-4.65728	9.28305	-22.6417	1.28443e-06	7.18583e-05	6.4041	DOWN
22169	A_55_P2067221	Iqsec3	ENSMUST00000051049	ens|IQ motif and Sec7 domain 3 [Source:MGI Symbol;Acc:MGI:2677208] [ENSMUST00000051049]	ENSMUSG00000040797	243621	-3.88893	11.2908	-22.6191	1.2914e-06	7.19351e-05	6.39921	DOWN
16424	A_55_P2112464	Grm5	NM_001143834	ref|Mus musculus glutamate receptor, metabotropic 5 (Grm5), transcript variant b, mRNA [NM_001143834]	ENSMUSG00000049583	108071	-4.29305	7.51337	-22.6146	1.29277e-06	7.19351e-05	6.39826	DOWN
12199	A_55_P2062652	Zfp941	NM_001001180	ref|Mus musculus zinc finger protein 941 (Zfp941), mRNA [NM_001001180]	ENSMUSG00000060314	407812	-4.57571	8.32125	-22.5919	1.29983e-06	7.21335e-05	6.39334	DOWN
26973	A_55_P2021505	Adra2a	NM_007417	ref|Mus musculus adrenergic receptor, alpha 2a (Adra2a), mRNA [NM_007417]	ENSMUSG00000033717	11551	-3.60905	10.0625	-22.5562	1.31104e-06	7.25606e-05	6.38557	DOWN
6142	A_51_P511250	Fam46b	NM_175307	ref|Mus musculus family with sequence similarity 46, member B (Fam46b), mRNA [NM_175307]	ENSMUSG00000046694	100342	3.80481	6.11328	22.5377	1.31688e-06	7.26153e-05	6.38155	UP
38	A_51_P487813	Lxn	NM_016753	ref|Mus musculus latexin (Lxn), mRNA [NM_016753]	ENSMUSG00000047557	17035	-3.49589	12.6353	-22.5308	1.31906e-06	7.26153e-05	6.38005	DOWN
1391	A_52_P150950	Olfm3	NM_153157	ref|Mus musculus olfactomedin 3 (Olfm3), transcript variant B, mRNA [NM_153157]	ENSMUSG00000027965	229759	-5.00443	7.04181	-22.4557	1.34314e-06	7.33422e-05	6.36368	DOWN
5497	A_51_P344249	Apbb1	NM_009685	ref|Mus musculus amyloid beta (A4) precursor protein-binding, family B, member 1 (Apbb1), mRNA [NM_009685]	ENSMUSG00000037032	11785	-4.43832	9.55936	-22.454	1.34371e-06	7.33422e-05	6.36329	DOWN
38684	A_52_P1020860	AW112010	NM_001177351	ref|Mus musculus expressed sequence AW112010 (AW112010), mRNA [NM_001177351]	ENSMUSG00000075010	107350	4.44315	8.04663	22.4471	1.34595e-06	7.33422e-05	6.36178	UP
1983	A_55_P2038252	Tyro3	NM_019392	ref|Mus musculus TYRO3 protein tyrosine kinase 3 (Tyro3), mRNA [NM_019392]	ENSMUSG00000027298	22174	-3.67346	8.60046	-22.4454	1.34648e-06	7.33422e-05	6.36143	DOWN
12313	A_55_P1985351	Slc35f2	NM_028060	ref|Mus musculus solute carrier family 35, member F2 (Slc35f2), mRNA [NM_028060]	ENSMUSG00000042195	72022	-3.90279	8.57394	-22.4077	1.35883e-06	7.37142e-05	6.35315	DOWN
33617	A_55_P1960167	Bcat2	NM_009737	ref|Mus musculus branched chain aminotransferase 2, mitochondrial (Bcat2), nuclear gene encoding mitochondrial protein, mRNA [NM_009737]	ENSMUSG00000030826	12036	3.92588	9.09486	22.3807	1.36771e-06	7.37142e-05	6.34723	UP
34286	A_55_P2091916	ENSMUST00000167326	ENSMUST00000167326	ens|predicted gene 8005 [Source:MGI Symbol;Acc:MGI:3645411] [ENSMUST00000167326]	ENSMUST00000167326	NA	-3.78444	5.96212	-22.3779	1.36867e-06	7.37142e-05	6.3466	DOWN
19595	A_52_P151116	Kcnab3	NM_010599	ref|Mus musculus potassium voltage-gated channel, shaker-related subfamily, beta member 3 (Kcnab3), mRNA [NM_010599]	ENSMUSG00000018470	16499	-6.20333	9.43288	-22.3693	1.37151e-06	7.37142e-05	6.34472	DOWN
2912	A_51_P312336	Slc14a1	NM_028122	ref|Mus musculus solute carrier family 14 (urea transporter), member 1 (Slc14a1), transcript variant 2, mRNA [NM_028122]	ENSMUSG00000059336	108052	-3.74505	7.91881	-22.369	1.3716e-06	7.37142e-05	6.34466	DOWN
11299	A_51_P499020	Fbp2	NM_007994	ref|Mus musculus fructose bisphosphatase 2 (Fbp2), mRNA [NM_007994]	ENSMUSG00000021456	14120	5.36461	5.77666	22.3426	1.38041e-06	7.37142e-05	6.33884	UP
36394	A_51_P382152	Procr	NM_011171	ref|Mus musculus protein C receptor, endothelial (Procr), mRNA [NM_011171]	ENSMUSG00000027611	19124	4.03313	7.16437	22.3373	1.3822e-06	7.37142e-05	6.33766	UP
22353	A_51_P380309	Ncam1	NM_001113204	ref|Mus musculus neural cell adhesion molecule 1 (Ncam1), transcript variant 3, mRNA [NM_001113204]	ENSMUSG00000039542	17967	-4.24121	10.3688	-22.3046	1.39321e-06	7.37142e-05	6.33045	DOWN
32361	A_52_P642488	Kcnk1	NM_008430	ref|Mus musculus potassium channel, subfamily K, member 1 (Kcnk1), mRNA [NM_008430]	ENSMUSG00000033998	16525	-6.05089	9.43245	-22.3007	1.39453e-06	7.37142e-05	6.3296	DOWN
8261	A_52_P17982	B3gat1	NM_029792	ref|Mus musculus beta-1,3-glucuronyltransferase 1 (glucuronosyltransferase P) (B3gat1), mRNA [NM_029792]	ENSMUSG00000045994	76898	-4.15565	6.82546	-22.3003	1.39466e-06	7.37142e-05	6.32951	DOWN
5456	A_51_P255699	Mmp3	NM_010809	ref|Mus musculus matrix metallopeptidase 3 (Mmp3), mRNA [NM_010809]	ENSMUSG00000043613	17392	4.17079	4.64968	22.2985	1.39528e-06	7.37142e-05	6.32911	UP
13080	A_66_P116461	Mro	NM_027741	ref|Mus musculus maestro (Mro), mRNA [NM_027741]	ENSMUSG00000064036	71263	-4.30316	7.08373	-22.295	1.39646e-06	7.37142e-05	6.32834	DOWN
14226	A_55_P2083919	Robo2	NM_175549	ref|Mus musculus roundabout homolog 2 (Drosophila) (Robo2), mRNA [NM_175549]	ENSMUSG00000052516	268902	-3.95792	6.38684	-22.2854	1.39973e-06	7.37142e-05	6.32621	DOWN
11082	A_51_P257982	Usp29	NM_021323	ref|Mus musculus ubiquitin specific peptidase 29 (Usp29), mRNA [NM_021323]	ENSMUSG00000051527	57775	-7.95954	9.55184	-22.2429	1.41426e-06	7.429e-05	6.31682	DOWN
8134	A_55_P2044580	Dusp15	NM_001159376	ref|Mus musculus dual specificity phosphatase-like 15 (Dusp15), transcript variant 1, mRNA [NM_001159376]	ENSMUSG00000042662	252864	-3.72719	6.50354	-22.2132	1.42455e-06	7.45427e-05	6.31022	DOWN
19432	A_52_P108850	St8sia1	NM_011374	ref|Mus musculus ST8 alpha-N-acetyl-neuraminide alpha-2,8-sialyltransferase 1 (St8sia1), mRNA [NM_011374]	ENSMUSG00000030283	20449	-3.9583	8.73945	-22.2082	1.42629e-06	7.45427e-05	6.3091	DOWN
18065	A_55_P2011220	Armcx1	NM_001166377	ref|Mus musculus armadillo repeat containing, X-linked 1 (Armcx1), transcript variant 1, mRNA [NM_001166377]	ENSMUSG00000033460	78248	-3.87772	9.65939	-22.181	1.4358e-06	7.4547e-05	6.30305	DOWN
37707	A_52_P320971	Mt3	NM_013603	ref|Mus musculus metallothionein 3 (Mt3), mRNA [NM_013603]	ENSMUSG00000031760	17751	-5.54127	11.1764	-22.1785	1.43669e-06	7.4547e-05	6.30249	DOWN
1803	A_51_P507509	Gimap1	NM_008376	ref|Mus musculus GTPase, IMAP family member 1 (Gimap1), transcript variant 1, mRNA [NM_008376]	ENSMUSG00000090019	16205	3.45867	6.98916	22.177	1.43721e-06	7.4547e-05	6.30216	UP
13691	A_55_P1965283	Wdr17	NM_028220	ref|Mus musculus WD repeat domain 17 (Wdr17), transcript variant 1, mRNA [NM_028220]	ENSMUSG00000039375	244484	-5.25773	8.13043	-22.1254	1.45544e-06	7.53037e-05	6.29066	DOWN
20474	A_51_P431046	St8sia3	NM_009182	ref|Mus musculus ST8 alpha-N-acetyl-neuraminide alpha-2,8-sialyltransferase 3 (St8sia3), mRNA [NM_009182]	ENSMUSG00000056812	20451	-5.73801	8.73683	-22.0763	1.47308e-06	7.59324e-05	6.27967	DOWN
7155	A_52_P49378	Kif1a	NM_008440	ref|Mus musculus kinesin family member 1A (Kif1a), transcript variant 1, mRNA [NM_008440]	ENSMUSG00000014602	16560	-4.83744	10.5679	-22.064	1.47755e-06	7.59324e-05	6.2769	DOWN
30101	A_55_P2031327	Gria2	NM_001083806	ref|Mus musculus glutamate receptor, ionotropic, AMPA2 (alpha 2) (Gria2), transcript variant 1, mRNA [NM_001083806]	ENSMUSG00000033981	14800	-3.40579	5.66208	-22.0501	1.48258e-06	7.59324e-05	6.27379	DOWN
1444	A_51_P497395	Lypd1	NM_145100	ref|Mus musculus Ly6/Plaur domain containing 1 (Lypd1), mRNA [NM_145100]	ENSMUSG00000026344	72585	-5.60954	7.43921	-22.0383	1.48691e-06	7.59324e-05	6.27113	DOWN
25437	A_55_P2276221	ENSMUST00000103315	ENSMUST00000103315	ens|immunoglobulin kappa variable 17-121 [Source:MGI Symbol;Acc:MGI:3647671] [ENSMUST00000103315]	ENSMUST00000103315	NA	3.80694	5.42489	22.0275	1.49087e-06	7.59324e-05	6.2687	UP
11079	A_55_P2096867	Gap43	NM_008083	ref|Mus musculus growth associated protein 43 (Gap43), mRNA [NM_008083]	ENSMUSG00000047261	14432	-4.15874	12.2836	-22.0207	1.49333e-06	7.59324e-05	6.26719	DOWN
1075	A_51_P316935	8430408G22Rik	NM_145980	ref|Mus musculus RIKEN cDNA 8430408G22 gene (8430408G22Rik), transcript variant 1, mRNA [NM_145980]	ENSMUSG00000048489	213393	5.20441	7.99258	22.0207	1.49334e-06	7.59324e-05	6.26719	UP
11602	A_52_P477573	Crtac1	NM_145123	ref|Mus musculus cartilage acidic protein 1 (Crtac1), mRNA [NM_145123]	ENSMUSG00000042401	72832	-4.46304	7.30018	-22.0004	1.50084e-06	7.59419e-05	6.26261	DOWN
36020	A_55_P2143572	ENSMUST00000048109	ENSMUST00000048109	ens|RIKEN cDNA 2700046A07 gene [Source:MGI Symbol;Acc:MGI:1919803] [ENSMUST00000048109]	ENSMUST00000048109	NA	-5.99939	8.16249	-21.9944	1.50305e-06	7.59419e-05	6.26126	DOWN
30045	A_51_P301998	Fmo2	NM_018881	ref|Mus musculus flavin containing monooxygenase 2 (Fmo2), mRNA [NM_018881]	ENSMUSG00000040170	55990	5.55766	8.1103	21.9649	1.51403e-06	7.59419e-05	6.2546	UP
34018	A_51_P274488	Pcdh8	NM_021543	ref|Mus musculus protocadherin 8 (Pcdh8), transcript variant 1, mRNA [NM_021543]	ENSMUSG00000036422	18530	-5.16337	6.94427	-21.9644	1.5142e-06	7.59419e-05	6.25449	DOWN
17930	A_51_P295237	Lrp11	NM_172784	ref|Mus musculus low density lipoprotein receptor-related protein 11 (Lrp11), mRNA [NM_172784]	ENSMUSG00000019796	237253	-3.73946	11.4386	-21.9597	1.51594e-06	7.59419e-05	6.25345	DOWN
15411	A_55_P1974804	Slc24a4	NM_172152	ref|Mus musculus solute carrier family 24 (sodium/potassium/calcium exchanger), member 4 (Slc24a4), mRNA [NM_172152]	ENSMUSG00000041771	238384	-5.13766	7.90105	-21.9569	1.51701e-06	7.59419e-05	6.2528	DOWN
28307	A_55_P1962901	Osr1	NM_011859	ref|Mus musculus odd-skipped related 1 (Drosophila) (Osr1), mRNA [NM_011859]	ENSMUSG00000048387	23967	4.03828	5.68281	21.9508	1.51928e-06	7.59419e-05	6.25143	UP
30080	A_55_P2073313	Unc79	NM_001081017	ref|Mus musculus unc-79 homolog (C. elegans) (Unc79), mRNA [NM_001081017]	ENSMUSG00000021198	217843	-3.55484	7.31362	-21.9408	1.52304e-06	7.59457e-05	6.24917	DOWN
475	A_66_P100765	Dao	NM_010018	ref|Mus musculus D-amino acid oxidase (Dao), mRNA [NM_010018]	ENSMUSG00000042096	13142	-4.95247	7.50201	-21.9096	1.53482e-06	7.61739e-05	6.24211	DOWN
34400	A_55_P2092296	Fbxo2	NM_176848	ref|Mus musculus F-box protein 2 (Fbxo2), mRNA [NM_176848]	ENSMUSG00000041556	230904	-5.44895	13.9747	-21.9092	1.53499e-06	7.61739e-05	6.24201	DOWN
25575	A_51_P162671	Folr2	NM_008035	ref|Mus musculus folate receptor 2 (fetal) (Folr2), mRNA [NM_008035]	ENSMUSG00000032725	14276	5.42164	6.19705	21.8788	1.54658e-06	7.65652e-05	6.23511	UP
34411	A_55_P2106916	Kcna1	NM_010595	ref|Mus musculus potassium voltage-gated channel, shaker-related subfamily, member 1 (Kcna1), mRNA [NM_010595]	ENSMUSG00000047976	16485	-4.98901	11.9598	-21.8527	1.55662e-06	7.67826e-05	6.22918	DOWN
30129	A_52_P223626	Olig2	NM_016967	ref|Mus musculus oligodendrocyte transcription factor 2 (Olig2), mRNA [NM_016967]	ENSMUSG00000039830	50913	-5.14875	7.67519	-21.848	1.55842e-06	7.67826e-05	6.22812	DOWN
6559	A_55_P2021447	Fkbp1b	NM_016863	ref|Mus musculus FK506 binding protein 1b (Fkbp1b), mRNA [NM_016863]	ENSMUSG00000020635	14226	-3.79389	9.7185	-21.7882	1.58173e-06	7.77418e-05	6.21449	DOWN
36938	A_55_P2048119	Slc29a4	NM_146257	ref|Mus musculus solute carrier family 29 (nucleoside transporters), member 4 (Slc29a4), mRNA [NM_146257]	ENSMUSG00000050822	243328	-3.46101	10.4442	-21.7733	1.58761e-06	7.77418e-05	6.21108	DOWN
802	A_52_P308465	Plxnb1	NM_172775	ref|Mus musculus plexin B1 (Plxnb1), mRNA [NM_172775]	ENSMUSG00000053646	235611	-3.72804	7.89149	-21.7693	1.58918e-06	7.77418e-05	6.21017	DOWN
6092	A_55_P2039556	Pak6	NM_001033254	ref|Mus musculus p21 protein (Cdc42/Rac)-activated kinase 6 (Pak6), transcript variant 1, mRNA [NM_001033254]	ENSMUSG00000074923	214230	-3.44005	6.98722	-21.7523	1.59593e-06	7.78875e-05	6.20628	DOWN
21069	A_52_P262201	Atcay	NM_178662	ref|Mus musculus ataxia, cerebellar, Cayman type homolog (human) (Atcay), mRNA [NM_178662]	ENSMUSG00000034958	16467	-6.25533	7.54943	-21.7424	1.59986e-06	7.78953e-05	6.20402	DOWN
36310	A_51_P352452	Dbx2	NM_207533	ref|Mus musculus developing brain homeobox 2 (Dbx2), mRNA [NM_207533]	ENSMUSG00000045608	223843	-7.26737	9.19207	-21.6952	1.6188e-06	7.85779e-05	6.19319	DOWN
21661	A_52_P478394	Dleu7	NM_173419	ref|Mus musculus deleted in lymphocytic leukemia, 7 (Dleu7), mRNA [NM_173419]	ENSMUSG00000048281	239133	-5.1791	7.57501	-21.6885	1.6215e-06	7.85779e-05	6.19166	DOWN
26376	A_55_P1963154	Folh1	NM_016770	ref|Mus musculus folate hydrolase (Folh1), transcript variant 1, mRNA [NM_016770]	ENSMUSG00000001773	53320	-3.54686	8.21285	-21.6682	1.62975e-06	7.87927e-05	6.18699	DOWN
38055	A_52_P269672	Sox8	NM_011447	ref|Mus musculus SRY-box containing gene 8 (Sox8), mRNA [NM_011447]	ENSMUSG00000024176	20681	-4.67105	6.89781	-21.6346	1.64354e-06	7.88676e-05	6.17923	DOWN
30352	A_51_P213928	Nap1l3	NM_138742	ref|Mus musculus nucleosome assembly protein 1-like 3 (Nap1l3), mRNA [NM_138742]	ENSMUSG00000055733	54561	-5.0131	8.75188	-21.6317	1.64471e-06	7.88676e-05	6.17857	DOWN
29220	A_55_P2026405	Foxb1	NM_022378	ref|Mus musculus forkhead box B1 (Foxb1), mRNA [NM_022378]	ENSMUSG00000059246	64290	-3.68693	5.87881	-21.6244	1.6477e-06	7.88676e-05	6.1769	DOWN
33518	A_55_P2109445	Irf4	NM_013674	ref|Mus musculus interferon regulatory factor 4 (Irf4), mRNA [NM_013674]	ENSMUSG00000021356	16364	5.09047	5.52391	21.6211	1.64908e-06	7.88676e-05	6.17613	UP
38738	A_66_P114461	Grm7	NM_177328	ref|Mus musculus glutamate receptor, metabotropic 7 (Grm7), mRNA [NM_177328]	ENSMUSG00000056755	108073	-5.01751	8.03036	-21.6119	1.65287e-06	7.88676e-05	6.17401	DOWN
8609	A_55_P2019784	Lrrtm1	NM_028880	ref|Mus musculus leucine rich repeat transmembrane neuronal 1 (Lrrtm1), mRNA [NM_028880]	ENSMUSG00000060780	74342	-4.57185	8.36145	-21.6087	1.65422e-06	7.88676e-05	6.17326	DOWN
19	A_51_P207591	Anxa8	NM_013473	ref|Mus musculus annexin A8 (Anxa8), mRNA [NM_013473]	ENSMUSG00000021950	11752	4.77153	6.47161	21.5454	1.68069e-06	7.99452e-05	6.15861	UP
4398	A_51_P160673	Kcne1l	NM_021487	ref|Mus musculus potassium voltage-gated channel, Isk-related family, member 1-like, pseudogene (Kcne1l), mRNA [NM_021487]	ENSMUSG00000090122	66240	-3.56354	7.70315	-21.535	1.6851e-06	7.99707e-05	6.1562	DOWN
22149	A_52_P628580	Ggt7	NM_144786	ref|Mus musculus gamma-glutamyltransferase 7 (Ggt7), mRNA [NM_144786]	ENSMUSG00000027603	207182	-5.16822	10.5426	-21.5203	1.69133e-06	7.99968e-05	6.15279	DOWN
5653	A_51_P232901	Cnp	NM_009923	ref|Mus musculus 2',3'-cyclic nucleotide 3' phosphodiesterase (Cnp), transcript variant 2, mRNA [NM_009923]	ENSMUSG00000006782	12799	-5.42788	12.5866	-21.5155	1.6934e-06	7.99968e-05	6.15166	DOWN
5241	A_51_P301930	Lrrc17	NM_028977	ref|Mus musculus leucine rich repeat containing 17 (Lrrc17), mRNA [NM_028977]	ENSMUSG00000039883	74511	3.8512	6.03055	21.4972	1.70122e-06	8.01824e-05	6.14741	UP
30797	A_55_P1999633	Cit	NM_007708	ref|Mus musculus citron (Cit), mRNA [NM_007708]	ENSMUSG00000029516	12704	-4.29416	7.5374	-21.4847	1.70656e-06	8.02512e-05	6.14451	DOWN
14971	A_52_P406181	Nacad	NM_001081652	ref|Mus musculus NAC alpha domain containing (Nacad), mRNA [NM_001081652]	ENSMUSG00000041073	192950	-4.54384	9.27317	-21.4535	1.72006e-06	8.03105e-05	6.13722	DOWN
10114	A_52_P568235	Fstl5	NM_178673	ref|Mus musculus follistatin-like 5 (Fstl5), mRNA [NM_178673]	ENSMUSG00000034098	213262	-4.32944	8.92451	-21.4498	1.72169e-06	8.03105e-05	6.13635	DOWN
9208	A_55_P1985433	Nrg1	NM_178591	ref|Mus musculus neuregulin 1 (Nrg1), mRNA [NM_178591]	ENSMUSG00000062991	211323	-4.95164	9.44883	-21.4488	1.72213e-06	8.03105e-05	6.13612	DOWN
38571	A_51_P143951	Astn1	NM_007495	ref|Mus musculus astrotactin 1 (Astn1), transcript variant 2, mRNA [NM_007495]	ENSMUSG00000026587	11899	-5.08599	10.5071	-21.4459	1.72338e-06	8.03105e-05	6.13544	DOWN
25728	A_55_P2165869	Cebpb	NM_009883	ref|Mus musculus CCAAT/enhancer binding protein (C/EBP), beta (Cebpb), mRNA [NM_009883]	ENSMUSG00000056501	12608	4.70987	10.9568	21.4295	1.73052e-06	8.04613e-05	6.13162	UP
3540	A_55_P1967539	Hunk	NM_015755	ref|Mus musculus hormonally upregulated Neu-associated kinase (Hunk), mRNA [NM_015755]	ENSMUSG00000053414	26559	-3.74117	8.98807	-21.3734	1.75525e-06	8.1347e-05	6.11848	DOWN
1282	A_52_P69194	Rimkla	NM_177572	ref|Mus musculus ribosomal modification protein rimK-like family member A (Rimkla), mRNA [NM_177572]	ENSMUSG00000048899	194237	-6.81094	10.7933	-21.3685	1.75745e-06	8.1347e-05	6.11732	DOWN
22346	A_55_P2176280	Prkar1b	BC011424	gb|Mus musculus protein kinase, cAMP dependent regulatory, type I beta, mRNA (cDNA clone MGC:18526 IMAGE:3674751), complete cds. [BC011424]	ENSMUSG00000025855	19085	-5.33314	11.6889	-21.3492	1.76607e-06	8.1563e-05	6.11279	DOWN
34735	A_55_P2092399	Ccdc160	NM_001034059	ref|Mus musculus coiled-coil domain containing 160 (Ccdc160), mRNA [NM_001034059]	ENSMUSG00000073207	434778	-3.9378	7.8625	-21.3101	1.78368e-06	8.21926e-05	6.10359	DOWN
6749	A_55_P1992954	Ddr2	NM_022563	ref|Mus musculus discoidin domain receptor family, member 2 (Ddr2), mRNA [NM_022563]	ENSMUSG00000026674	18214	3.60652	6.56033	21.255	1.80887e-06	8.28117e-05	6.09059	UP
3018	A_55_P2162910	Rtn1	NM_153457	ref|Mus musculus reticulon 1 (Rtn1), transcript variant 1, mRNA [NM_153457]	ENSMUSG00000021087	104001	-4.78412	14.322	-21.248	1.81209e-06	8.28117e-05	6.08893	DOWN
38069	A_55_P2173011	Nfasc	NM_182716	ref|Mus musculus neurofascin (Nfasc), transcript variant 1, mRNA [NM_182716]	ENSMUSG00000026442	269116	-5.27801	11.0229	-21.2311	1.81993e-06	8.28117e-05	6.08492	DOWN
16498	A_51_P456870	Foxj1	NM_008240	ref|Mus musculus forkhead box J1 (Foxj1), mRNA [NM_008240]	ENSMUSG00000034227	15223	-5.84032	7.71461	-21.2261	1.82222e-06	8.28117e-05	6.08376	DOWN
20561	A_51_P209280	Rab31	NM_133685	ref|Mus musculus RAB31, member RAS oncogene family (Rab31), mRNA [NM_133685]	ENSMUSG00000056515	106572	-3.57791	10.3115	-21.2254	1.82256e-06	8.28117e-05	6.08358	DOWN
10622	A_51_P214127	Cpa3	NM_007753	ref|Mus musculus carboxypeptidase A3, mast cell (Cpa3), mRNA [NM_007753]	ENSMUSG00000001865	12873	5.48062	5.05883	21.2158	1.82704e-06	8.28117e-05	6.0813	UP
13430	A_51_P356620	Rab39b	NM_175122	ref|Mus musculus RAB39B, member RAS oncogene family (Rab39b), mRNA [NM_175122]	ENSMUSG00000031202	67790	-4.08826	6.82895	-21.2141	1.82782e-06	8.28117e-05	6.08091	DOWN
177	A_55_P1971139	Fbll1	NM_001004147	ref|Mus musculus fibrillarin-like 1 (Fbll1), mRNA [NM_001004147]	ENSMUSG00000051062	237730	-4.37632	8.7015	-21.2111	1.82921e-06	8.28117e-05	6.0802	DOWN
444	A_55_P2172022	B4galt1	NM_022305	ref|Mus musculus UDP-Gal:betaGlcNAc beta 1,4- galactosyltransferase, polypeptide 1 (B4galt1), mRNA [NM_022305]	ENSMUSG00000028413	14595	3.39332	7.41206	21.1638	1.85144e-06	8.36349e-05	6.06897	UP
36850	A_51_P390285	Larp6	NM_026235	ref|Mus musculus La ribonucleoprotein domain family, member 6 (Larp6), mRNA [NM_026235]	ENSMUSG00000034839	67557	-4.29265	11.0965	-21.1346	1.86537e-06	8.38424e-05	6.062	DOWN
29418	A_66_P129893	1700047M11Rik	NR_015458	ref|Mus musculus RIKEN cDNA 1700047M11 gene (1700047M11Rik), non-coding RNA [NR_015458]	ENSMUSG00000100147	67330	-5.28789	9.34828	-21.1262	1.86937e-06	8.38424e-05	6.06001	DOWN
2569	A_55_P2154749	Shisa6	NM_001034874	ref|Mus musculus shisa homolog 6 (Xenopus laevis) (Shisa6), mRNA [NM_001034874]	ENSMUSG00000053930	380702	-3.94526	6.64385	-21.1247	1.87008e-06	8.38424e-05	6.05965	DOWN
17957	A_51_P370458	Krtap17-1	NM_001099774	ref|Mus musculus keratin associated protein 17-1 (Krtap17-1), mRNA [NM_001099774]	ENSMUSG00000078252	77914	-3.97932	6.25782	-21.1201	1.87228e-06	8.38424e-05	6.05856	DOWN
6693	A_51_P334104	Dcn	NM_007833	ref|Mus musculus decorin (Dcn), transcript variant 2, mRNA [NM_007833]	ENSMUSG00000019929	13179	4.78538	12.5206	21.1115	1.87641e-06	8.38456e-05	6.0565	UP
2638	A_51_P277275	Rit2	NM_009065	ref|Mus musculus Ras-like without CAAX 2 (Rit2), mRNA [NM_009065]	ENSMUSG00000057455	19762	-5.11479	11.938	-21.0788	1.89223e-06	8.43696e-05	6.04869	DOWN
10857	A_52_P642836	Pnmal2	NM_001099636	ref|Mus musculus PNMA-like 2 (Pnmal2), mRNA [NM_001099636]	ENSMUSG00000070802	434128	-5.34824	8.4687	-21.0554	1.90365e-06	8.45216e-05	6.04308	DOWN
22143	A_52_P602898	Nkrf	NM_029891	ref|Mus musculus NF-kappaB repressing factor (Nkrf), mRNA [NM_029891]	ENSMUSG00000044149	77286	-3.59089	8.95336	-21.0501	1.90622e-06	8.45216e-05	6.04182	DOWN
39118	A_55_P1983314	Crat	NM_007760	ref|Mus musculus carnitine acetyltransferase (Crat), nuclear gene encoding mitochondrial protein, mRNA [NM_007760]	ENSMUSG00000026853	12908	4.3623	6.88171	21.0467	1.90792e-06	8.45216e-05	6.04099	UP
21643	A_55_P2092671	Nppc	NM_010933	ref|Mus musculus natriuretic peptide type C (Nppc), mRNA [NM_010933]	ENSMUSG00000026241	18159	-5.08635	7.15743	-21.0261	1.91803e-06	8.47874e-05	6.03607	DOWN
24816	A_52_P179309	Gria3	NM_016886	ref|Mus musculus glutamate receptor, ionotropic, AMPA3 (alpha 3) (Gria3), mRNA [NM_016886]	ENSMUSG00000001986	53623	-4.28987	7.68349	-21.0155	1.92328e-06	8.48382e-05	6.03351	DOWN
33603	A_55_P2124856	Ipw	NR_015351	ref|Mus musculus imprinted gene in the Prader-Willi syndrome region (Ipw), non-coding RNA [NR_015351]	ENSMUSG00000100826	16353	-5.34693	7.49179	-20.9993	1.93134e-06	8.50083e-05	6.02962	DOWN
15239	A_55_P2062054	Dbndd2	NM_026797	ref|Mus musculus dysbindin (dystrobrevin binding protein 1) domain containing 2 (Dbndd2), transcript variant 2, mRNA [NM_026797]	ENSMUSG00000017734	52840	-4.45222	13.5376	-20.9912	1.93538e-06	8.50083e-05	6.02767	DOWN
34508	A_66_P101600	Lamb1	NM_008482	ref|Mus musculus laminin B1 (Lamb1), mRNA [NM_008482]	ENSMUSG00000002900	16777	3.98933	9.60902	20.9606	1.95072e-06	8.55002e-05	6.0203	UP
20004	A_52_P201558	Rgs7bp	NM_029879	ref|Mus musculus regulator of G-protein signalling 7 binding protein (Rgs7bp), mRNA [NM_029879]	ENSMUSG00000021719	52882	-4.07867	8.32963	-20.9514	1.95534e-06	8.55214e-05	6.01809	DOWN
3910	A_55_P2066593	Oprl1	NM_011012	ref|Mus musculus opioid receptor-like 1 (Oprl1), mRNA [NM_011012]	ENSMUSG00000027584	18389	-4.78236	8.47676	-20.8946	1.98429e-06	8.65196e-05	6.00435	DOWN
25287	A_66_P104815	Ecm1	NM_007899	ref|Mus musculus extracellular matrix protein 1 (Ecm1), mRNA [NM_007899]	ENSMUSG00000028108	13601	4.65622	7.74522	20.8902	1.98655e-06	8.65196e-05	6.00329	UP
14649	A_55_P2161238	9330182L06Rik	NM_172706	ref|Mus musculus RIKEN cDNA 9330182L06 gene (9330182L06Rik), mRNA [NM_172706]	ENSMUSG00000056004	231014	-3.98654	7.76584	-20.8768	1.99347e-06	8.66384e-05	6.00004	DOWN
15100	A_51_P194853	Sec14l4	NM_146013	ref|Mus musculus SEC14-like 4 (S. cerevisiae) (Sec14l4), mRNA [NM_146013]	ENSMUSG00000019368	103655	7.16921	6.6161	20.8527	2.00598e-06	8.69987e-05	5.99419	UP
22800	A_51_P295896	4930452B06Rik	NM_028934	ref|Mus musculus RIKEN cDNA 4930452B06 gene (4930452B06Rik), mRNA [NM_028934]	ENSMUSG00000021747	74430	-3.25364	6.16155	-20.8428	2.01115e-06	8.70404e-05	5.99178	DOWN
6351	A_51_P198434	H2-K1	NM_001001892	ref|Mus musculus histocompatibility 2, K1, K region (H2-K1), transcript variant 1, mRNA [NM_001001892]	ENSMUSG00000061232	14972	3.30245	12.2762	20.817	2.02464e-06	8.73166e-05	5.98552	UP
7513	A_52_P108845	Clip3	NM_001081114	ref|Mus musculus CAP-GLY domain containing linker protein 3 (Clip3), mRNA [NM_001081114]	ENSMUSG00000013921	76686	-4.45978	13.0249	-20.8112	2.02771e-06	8.73166e-05	5.9841	DOWN
2361	A_55_P2130925	Ppp2r2b	NM_028392	ref|Mus musculus protein phosphatase 2 (formerly 2A), regulatory subunit B (PR 52), beta isoform (Ppp2r2b), transcript variant 2, mRNA [NM_028392]	ENSMUSG00000024500	72930	-4.63274	9.02739	-20.8037	2.03168e-06	8.73166e-05	5.98227	DOWN
23540	A_55_P1959576	Slitrk4	NM_178740	ref|Mus musculus SLIT and NTRK-like family, member 4 (Slitrk4), mRNA [NM_178740]	ENSMUSG00000046699	245446	-4.06436	7.77755	-20.7867	2.04068e-06	8.73166e-05	5.97813	DOWN
7886	A_55_P2134105	Brsk2	NM_001009929	ref|Mus musculus BR serine/threonine kinase 2 (Brsk2), transcript variant 2, mRNA [NM_001009929]	ENSMUSG00000053046	75770	-3.85901	7.55477	-20.7761	2.04635e-06	8.73166e-05	5.97553	DOWN
21276	A_51_P146560	Msln	NM_018857	ref|Mus musculus mesothelin (Msln), mRNA [NM_018857]	ENSMUSG00000063011	56047	7.01416	6.78197	20.7738	2.04753e-06	8.73166e-05	5.97499	UP
7207	A_51_P267933	Snhg11	NM_175692	ref|Mus musculus small nucleolar RNA host gene 11 (Snhg11), mRNA [NM_175692]	ENSMUSG00000044349	319317	-3.71705	10.4452	-20.7731	2.04791e-06	8.73166e-05	5.97482	DOWN
18558	A_55_P2111336	Klhl32	ENSMUST00000108218	ens|kelch-like 32 (Drosophila) [Source:MGI Symbol;Acc:MGI:3612790] [ENSMUST00000108218]	ENSMUSG00000040387	212390	-4.24691	7.72568	-20.7666	2.05137e-06	8.73166e-05	5.97323	DOWN
20930	A_51_P371750	Marco	NM_010766	ref|Mus musculus macrophage receptor with collagenous structure (Marco), mRNA [NM_010766]	ENSMUSG00000026390	17167	6.394	8.62847	20.7275	2.07242e-06	8.80259e-05	5.96366	UP
6563	A_55_P2116160	Ccdc106	NM_146178	ref|Mus musculus coiled-coil domain containing 106 (Ccdc106), mRNA [NM_146178]	ENSMUSG00000035228	232821	-5.07977	9.04014	-20.7158	2.07878e-06	8.80259e-05	5.96079	DOWN
5729	A_55_P2029622	Ppp1r3f	NM_138605	ref|Mus musculus protein phosphatase 1, regulatory (inhibitor) subunit 3F (Ppp1r3f), mRNA [NM_138605]	ENSMUSG00000039556	54646	-3.41295	7.51898	-20.7076	2.08321e-06	8.80259e-05	5.95879	DOWN
13350	A_51_P201982	Angpt2	NM_007426	ref|Mus musculus angiopoietin 2 (Angpt2), mRNA [NM_007426]	ENSMUSG00000031465	11601	3.48977	5.86784	20.7042	2.08509e-06	8.80259e-05	5.95794	UP
10461	A_51_P259118	Klhl1	NM_053105	ref|Mus musculus kelch-like 1 (Drosophila) (Klhl1), mRNA [NM_053105]	ENSMUSG00000022076	93688	-6.30211	7.72239	-20.6907	2.09243e-06	8.81552e-05	5.95465	DOWN
19580	A_52_P312204	Nxph1	NM_008751	ref|Mus musculus neurexophilin 1 (Nxph1), mRNA [NM_008751]	ENSMUSG00000046178	18231	-3.86339	5.81797	-20.6541	2.1126e-06	8.87222e-05	5.94564	DOWN
9474	A_51_P441898	Krt25	NM_133730	ref|Mus musculus keratin 25 (Krt25), mRNA [NM_133730]	ENSMUSG00000035831	70810	-3.98485	6.29769	-20.6255	2.12848e-06	8.87222e-05	5.9386	DOWN
26938	A_55_P2132010	Tekt5	NM_001099275	ref|Mus musculus tektin 5 (Tekt5), mRNA [NM_001099275]	ENSMUSG00000039179	70426	-5.27318	7.41522	-20.6157	2.13399e-06	8.87222e-05	5.93617	DOWN
26612	A_55_P2114110	Cadm4	NM_153112	ref|Mus musculus cell adhesion molecule 4 (Cadm4), mRNA [NM_153112]	ENSMUSG00000054793	260299	-4.96343	11.2151	-20.6144	2.13472e-06	8.87222e-05	5.93585	DOWN
6036	A_55_P2020602	Pacsin1	NM_178365	ref|Mus musculus protein kinase C and casein kinase substrate in neurons 1 (Pacsin1), transcript variant 2, mRNA [NM_178365]	ENSMUSG00000040276	23969	-4.05442	12.6226	-20.6099	2.1372e-06	8.87222e-05	5.93476	DOWN
27427	A_55_P1967325	Fam19a5	NM_134096	ref|Mus musculus family with sequence similarity 19, member A5 (Fam19a5), mRNA [NM_134096]	ENSMUSG00000054863	106014	-3.6059	11.5974	-20.608	2.13829e-06	8.87222e-05	5.93428	DOWN
6913	A_55_P2160286	Olfm1	NM_001038612	ref|Mus musculus olfactomedin 1 (Olfm1), transcript variant 2, mRNA [NM_001038612]	ENSMUSG00000026833	56177	-3.64555	10.8777	-20.606	2.1394e-06	8.87222e-05	5.93379	DOWN
18635	A_55_P2003251	Magel2	NM_013779	ref|Mus musculus melanoma antigen, family L, 2 (Magel2), mRNA [NM_013779]	ENSMUSG00000056972	27385	-4.8329	7.10186	-20.6045	2.14027e-06	8.87222e-05	5.93341	DOWN
22852	A_52_P267717	Cd209b	NM_001037800	ref|Mus musculus CD209b antigen (Cd209b), transcript variant 2, mRNA [NM_001037800]	ENSMUSG00000065987	69165	5.09621	5.12885	20.593	2.14672e-06	8.88114e-05	5.93058	UP
26918	A_51_P157042	Ctgf	NM_010217	ref|Mus musculus connective tissue growth factor (Ctgf), mRNA [NM_010217]	ENSMUSG00000019997	14219	3.41476	10.5233	20.5518	2.17011e-06	8.95997e-05	5.92038	UP
17157	A_55_P2005470	Mfap4	NM_029568	ref|Mus musculus microfibrillar-associated protein 4 (Mfap4), mRNA [NM_029568]	ENSMUSG00000042436	76293	4.40559	7.98281	20.5371	2.17851e-06	8.97669e-05	5.91675	UP
2382	A_51_P117087	Kcnip1	NM_027398	ref|Mus musculus Kv channel-interacting protein 1 (Kcnip1), transcript variant B, mRNA [NM_027398]	ENSMUSG00000053519	70357	-5.24974	7.38304	-20.5186	2.18915e-06	9.00253e-05	5.91216	DOWN
17775	A_51_P204387	Tmem63c	NM_172583	ref|Mus musculus transmembrane protein 63c (Tmem63c), mRNA [NM_172583]	ENSMUSG00000034145	217733	-4.34772	7.86608	-20.5086	2.19495e-06	9.00847e-05	5.90967	DOWN
38031	A_55_P1983553	AF529169	NM_153509	ref|Mus musculus cDNA sequence AF529169 (AF529169), mRNA [NM_153509]	ENSMUSG00000039313	209743	-3.67669	6.11303	-20.4931	2.20395e-06	9.01677e-05	5.90582	DOWN
11552	A_52_P165773	Prmt8	NM_201371	ref|Mus musculus protein arginine N-methyltransferase 8 (Prmt8), mRNA [NM_201371]	ENSMUSG00000030350	381813	-4.09828	6.50415	-20.4901	2.20571e-06	9.01677e-05	5.90506	DOWN
22797	A_55_P2052006	Nol4	NM_199024	ref|Mus musculus nucleolar protein 4 (Nol4), transcript variant 2, mRNA [NM_199024]	ENSMUSG00000041923	319211	-3.56799	5.69421	-20.4529	2.22749e-06	9.07443e-05	5.8958	DOWN
27767	A_51_P237668	Bex2	NM_009749	ref|Mus musculus brain expressed X-linked 2 (Bex2), mRNA [NM_009749]	ENSMUSG00000042750	12069	-4.88218	12.6437	-20.451	2.22861e-06	9.07443e-05	5.89533	DOWN
24589	A_51_P148612	Cox7a1	NM_009944	ref|Mus musculus cytochrome c oxidase, subunit VIIa 1 (Cox7a1), nuclear gene encoding mitochondrial protein, mRNA [NM_009944]	ENSMUSG00000074218	12865	5.74035	13.3683	20.4386	2.23593e-06	9.08572e-05	5.89223	UP
7243	A_55_P1973501	Ceacam16	NM_001033419	ref|Mus musculus carcinoembryonic antigen-related cell adhesion molecule 16 (Ceacam16), mRNA [NM_001033419]	ENSMUSG00000014686	330483	3.40148	5.00545	20.4314	2.24018e-06	9.08572e-05	5.89044	UP
28770	A_52_P448870	Rab26	NM_177375	ref|Mus musculus RAB26, member RAS oncogene family (Rab26), mRNA [NM_177375]	ENSMUSG00000079657	328778	-4.91647	7.57207	-20.4167	2.24896e-06	9.08952e-05	5.88676	DOWN
11573	A_55_P2175880	Mgst1	NM_019946	ref|Mus musculus microsomal glutathione S-transferase 1 (Mgst1), mRNA [NM_019946]	ENSMUSG00000008540	56615	3.7927	11.8252	20.415	2.24992e-06	9.08952e-05	5.88635	UP
27317	A_52_P344138	Gabrb3	NM_008071	ref|Mus musculus gamma-aminobutyric acid (GABA) A receptor, subunit beta 3 (Gabrb3), transcript variant 1, mRNA [NM_008071]	ENSMUSG00000033676	14402	-5.97363	7.6312	-20.384	2.26851e-06	9.11719e-05	5.87858	DOWN
17984	A_55_P1993285	Olfr173	NM_147000	ref|Mus musculus olfactory receptor 173 (Olfr173), mRNA [NM_147000]	ENSMUSG00000049362	259002	-7.98726	8.4217	-20.3835	2.26882e-06	9.11719e-05	5.87845	DOWN
3053	A_52_P418644	Plp2	NM_019755	ref|Mus musculus proteolipid protein 2 (Plp2), mRNA [NM_019755]	ENSMUSG00000031146	18824	3.37373	9.1326	20.3815	2.27002e-06	9.11719e-05	5.87795	UP
30343	A_55_P1985410	Reps2	NM_178256	ref|Mus musculus RALBP1 associated Eps domain containing protein 2 (Reps2), mRNA [NM_178256]	ENSMUSG00000040855	194590	-3.74667	9.60758	-20.3721	2.27567e-06	9.12211e-05	5.87561	DOWN
3602	A_55_P2002309	Pip5kl1	NM_198191	ref|Mus musculus phosphatidylinositol-4-phosphate 5-kinase-like 1 (Pip5kl1), mRNA [NM_198191]	ENSMUSG00000046854	227733	-4.16458	8.56208	-20.3603	2.28287e-06	9.13323e-05	5.87263	DOWN
27045	A_51_P438805	Txnip	NM_001009935	ref|Mus musculus thioredoxin interacting protein (Txnip), transcript variant 1, mRNA [NM_001009935]	ENSMUSG00000038393	56338	3.34436	10.1699	20.3051	2.31663e-06	9.24591e-05	5.85875	UP
10664	A_55_P2097340	Camkv	NM_145621	ref|Mus musculus CaM kinase-like vesicle-associated (Camkv), mRNA [NM_145621]	ENSMUSG00000032936	235604	-8.0506	10.565	-20.2996	2.31999e-06	9.24591e-05	5.85738	DOWN
15701	A_66_P119968	Clec4a1	NM_199311	ref|Mus musculus C-type lectin domain family 4, member a1 (Clec4a1), mRNA [NM_199311]	ENSMUSG00000049037	269799	3.61635	6.16056	20.292	2.32473e-06	9.24694e-05	5.85545	UP
26861	A_55_P1998244	Itgb8	NM_177290	ref|Mus musculus integrin beta 8 (Itgb8), mRNA [NM_177290]	ENSMUSG00000025321	320910	-3.17956	6.12507	-20.2822	2.3308e-06	9.25327e-05	5.85298	DOWN
19750	A_52_P453374	Lrrn4cl	NM_001013019	ref|Mus musculus LRRN4 C-terminal like (Lrrn4cl), mRNA [NM_001013019]	ENSMUSG00000071656	68852	3.41317	7.51517	20.2516	2.34991e-06	9.29586e-05	5.84525	UP
14461	A_51_P406466	Ankrd35	NM_001081139	ref|Mus musculus ankyrin repeat domain 35 (Ankrd35), mRNA [NM_001081139]	ENSMUSG00000038354	213121	-4.2414	8.80146	-20.2476	2.3524e-06	9.29586e-05	5.84425	DOWN
2679	A_51_P513530	Spag5	NM_017407	ref|Mus musculus sperm associated antigen 5 (Spag5), mRNA [NM_017407]	ENSMUSG00000002055	54141	-4.01137	7.97964	-20.2434	2.35504e-06	9.29586e-05	5.84319	DOWN
8836	A_66_P135185	Etv1	NM_007960	ref|Mus musculus ets variant gene 1 (Etv1), transcript variant 1, mRNA [NM_007960]	ENSMUSG00000004151	14009	-3.80058	8.92646	-20.2178	2.37121e-06	9.34184e-05	5.83671	DOWN
20031	A_51_P512992	Entpd3	NM_178676	ref|Mus musculus ectonucleoside triphosphate diphosphohydrolase 3 (Entpd3), mRNA [NM_178676]	ENSMUSG00000041608	215446	-4.12332	9.99447	-20.1967	2.38463e-06	9.37682e-05	5.83136	DOWN
2188	A_51_P250559	Kcnj14	NM_145963	ref|Mus musculus potassium inwardly-rectifying channel, subfamily J, member 14 (Kcnj14), mRNA [NM_145963]	ENSMUSG00000058743	211480	-4.10877	6.23497	-20.1813	2.39448e-06	9.37986e-05	5.82746	DOWN
3722	A_51_P142515	Antxr2	NM_133738	ref|Mus musculus anthrax toxin receptor 2 (Antxr2), mRNA [NM_133738]	ENSMUSG00000029338	71914	3.60527	7.61245	20.1791	2.39595e-06	9.37986e-05	5.82688	UP
15016	A_52_P526396	Atl1	NM_178628	ref|Mus musculus atlastin GTPase 1 (Atl1), mRNA [NM_178628]	ENSMUSG00000021066	73991	-4.28392	9.91857	-20.1726	2.40011e-06	9.37986e-05	5.82523	DOWN
2714	A_55_P2113758	Gria1	NM_001113325	ref|Mus musculus glutamate receptor, ionotropic, AMPA1 (alpha 1) (Gria1), transcript variant 1, mRNA [NM_001113325]	ENSMUSG00000020524	14799	-5.08517	7.88237	-20.1672	2.40358e-06	9.37986e-05	5.82386	DOWN
7384	A_55_P2058315	Panx2	NM_001002005	ref|Mus musculus pannexin 2 (Panx2), mRNA [NM_001002005]	ENSMUSG00000058441	406218	-4.88597	7.39844	-20.1388	2.422e-06	9.42088e-05	5.81662	DOWN
26460	A_55_P2065577	ENSMUST00000144411	ENSMUST00000144411	ens|RIKEN cDNA 6430503K07 gene [Source:MGI Symbol;Acc:MGI:1925318] [ENSMUST00000144411]	ENSMUST00000144411	NA	-5.88113	7.38832	-20.1369	2.42322e-06	9.42088e-05	5.81615	DOWN
1164	A_55_P2142818	Slc5a7	NM_022025	ref|Mus musculus solute carrier family 5 (choline transporter), member 7 (Slc5a7), mRNA [NM_022025]	ENSMUSG00000023945	63993	-5.71316	8.00987	-20.1173	2.43598e-06	9.45269e-05	5.81116	DOWN
17428	A_55_P2141876	Ldha	NM_001136069	ref|Mus musculus lactate dehydrogenase A (Ldha), transcript variant 2, mRNA [NM_001136069]	ENSMUSG00000063229	16828	3.49593	12.3434	20.0769	2.46265e-06	9.53826e-05	5.80082	UP
10878	A_51_P381618	Pla1a	NM_134102	ref|Mus musculus phospholipase A1 member A (Pla1a), mRNA [NM_134102]	ENSMUSG00000002847	85031	3.98969	7.79957	20.0611	2.4731e-06	9.56081e-05	5.7968	UP
7480	A_55_P1979575	Shroom2	NM_172441	ref|Mus musculus shroom family member 2 (Shroom2), mRNA [NM_172441]	ENSMUSG00000045180	110380	-3.12961	7.9203	-20.0393	2.48774e-06	9.5994e-05	5.79119	DOWN
29889	A_66_P126662	4732414G09Rik	AK076313	gb|Mus musculus 10 days neonate skin cDNA, RIKEN full-length enriched library, clone:4732414G09 product:chromobox homolog 3 (Drosophila HP1 gamma), pseudogene3, full insert sequence. [AK076313]	ENSMUSG00000086943	100043309	-4.14448	7.97361	-20.0129	2.50547e-06	9.60714e-05	5.78444	DOWN
5991	A_55_P2020497	Dcaf12l1	NM_178739	ref|Mus musculus DDB1 and CUL4 associated factor 12-like 1 (Dcaf12l1), transcript variant A, mRNA [NM_178739]	ENSMUSG00000045284	245404	-4.67079	9.11097	-20.0097	2.50768e-06	9.60714e-05	5.7836	DOWN
38877	A_55_P2139501	Alk	NM_007439	ref|Mus musculus anaplastic lymphoma kinase (Alk), mRNA [NM_007439]	ENSMUSG00000055471	11682	-4.28671	7.53152	-20.0021	2.5128e-06	9.60714e-05	5.78166	DOWN
37799	A_51_P502872	2200002D01Rik	NM_028179	ref|Mus musculus RIKEN cDNA 2200002D01 gene (2200002D01Rik), mRNA [NM_028179]	ENSMUSG00000030587	72275	3.60362	6.52381	19.9902	2.52094e-06	9.60714e-05	5.77859	UP
21143	A_55_P2025490	Tnfrsf18	NM_009400	ref|Mus musculus tumor necrosis factor receptor superfamily, member 18 (Tnfrsf18), transcript variant 1, mRNA [NM_009400]	ENSMUSG00000041954	21936	3.86	5.42892	19.9895	2.52138e-06	9.60714e-05	5.77842	UP
21384	A_55_P1993807	Nudt10	NM_001031664	ref|Mus musculus nudix (nucleoside diphosphate linked moiety X)-type motif 10 (Nudt10), mRNA [NM_001031664]	ENSMUSG00000073293	102954	-4.5253	9.6883	-19.9883	2.52221e-06	9.60714e-05	5.77811	DOWN
19019	A_51_P496432	Acsl1	NM_007981	ref|Mus musculus acyl-CoA synthetase long-chain family member 1 (Acsl1), mRNA [NM_007981]	ENSMUSG00000018796	14081	4.83533	11.1558	19.9882	2.52232e-06	9.60714e-05	5.77807	UP
24818	A_55_P2398788	Rnf112	NM_009548	ref|Mus musculus ring finger protein 112 (Rnf112), mRNA [NM_009548]	ENSMUSG00000010086	22671	-6.54647	8.7472	-19.9632	2.53938e-06	9.62881e-05	5.77165	DOWN
8824	A_52_P373694	Jph4	NM_177049	ref|Mus musculus junctophilin 4 (Jph4), mRNA [NM_177049]	ENSMUSG00000022208	319984	-3.83582	8.04959	-19.9609	2.54102e-06	9.62881e-05	5.77104	DOWN
3104	A_52_P149545	Tacr1	NM_009313	ref|Mus musculus tachykinin receptor 1 (Tacr1), mRNA [NM_009313]	ENSMUSG00000030043	21336	-4.7746	6.59596	-19.9551	2.54501e-06	9.62881e-05	5.76954	DOWN
34590	A_55_P2073035	1700091H14Rik	AK007033	gb|Mus musculus adult male testis cDNA, RIKEN full-length enriched library, clone:1700091H14 product:hypothetical protein, full insert sequence. [AK007033]	ENSMUSG00000090462	73553	-3.31503	5.65165	-19.949	2.54918e-06	9.62881e-05	5.76799	DOWN
14049	A_55_P2003473	Zc4h2	NM_001003916	ref|Mus musculus zinc finger, C4H2 domain containing (Zc4h2), mRNA [NM_001003916]	ENSMUSG00000035062	245522	-3.10411	8.66882	-19.9409	2.5548e-06	9.62881e-05	5.76589	DOWN
17412	A_55_P2026492	Stab2	ENSMUST00000160580	ens|stabilin 2 [Source:MGI Symbol;Acc:MGI:2178743] [ENSMUST00000160580]	ENSMUSG00000035459	192188	3.06285	5.72368	19.9365	2.55785e-06	9.62881e-05	5.76475	UP
9884	A_55_P2269289	Dgkg	NM_138650	ref|Mus musculus diacylglycerol kinase, gamma (Dgkg), mRNA [NM_138650]	ENSMUSG00000022861	110197	-3.57513	7.88745	-19.9325	2.56065e-06	9.62881e-05	5.76371	DOWN
13410	A_55_P2291054	Elavl2	NM_001177883	ref|Mus musculus ELAV (embryonic lethal, abnormal vision, Drosophila)-like 2 (Hu antigen B) (Elavl2), transcript variant 4, mRNA [NM_001177883]	ENSMUSG00000008489	15569	-3.84889	8.23967	-19.9061	2.57903e-06	9.68026e-05	5.7569	DOWN
35352	A_51_P188271	Cd248	NM_054042	ref|Mus musculus CD248 antigen, endosialin (Cd248), mRNA [NM_054042]	ENSMUSG00000056481	70445	4.61917	8.14978	19.878	2.59878e-06	9.73671e-05	5.74962	UP
14041	A_55_P2142430	Bank1	NM_001033350	ref|Mus musculus B-cell scaffold protein with ankyrin repeats 1 (Bank1), mRNA [NM_001033350]	ENSMUSG00000037922	242248	3.73213	5.64269	19.8709	2.60383e-06	9.73695e-05	5.74777	UP
17113	A_55_P2028465	Adam22	NM_001007220	ref|Mus musculus a disintegrin and metallopeptidase domain 22 (Adam22), transcript variant 1, mRNA [NM_001007220]	ENSMUSG00000040537	11496	-3.17974	6.66549	-19.8646	2.60828e-06	9.73695e-05	5.74615	DOWN
31360	A_55_P1955568	Extl2	NM_021388	ref|Mus musculus exostoses (multiple)-like 2 (Extl2), transcript variant 1, mRNA [NM_021388]	ENSMUSG00000027963	58193	-3.35811	11.5156	-19.8493	2.61923e-06	9.76018e-05	5.74215	DOWN
15375	A_55_P2012221	Armcx2	NM_026139	ref|Mus musculus armadillo repeat containing, X-linked 2 (Armcx2), transcript variant 1, mRNA [NM_026139]	ENSMUSG00000033436	67416	-3.46798	11.1729	-19.8243	2.6371e-06	9.78753e-05	5.73566	DOWN
16047	A_51_P322640	Ccl24	NM_019577	ref|Mus musculus chemokine (C-C motif) ligand 24 (Ccl24), mRNA [NM_019577]	ENSMUSG00000004814	56221	4.58864	6.04445	19.8224	2.63844e-06	9.78753e-05	5.73518	UP
26121	A_52_P537852	Fam120b	NM_024203	ref|Mus musculus family with sequence similarity 120, member B (Fam120b), transcript variant 1, mRNA [NM_024203]	ENSMUSG00000014763	67544	-3.06438	8.78454	-19.8192	2.64079e-06	9.78753e-05	5.73433	DOWN
20548	A_55_P1962516	Fam19a2	NM_182807	ref|Mus musculus family with sequence similarity 19, member A2 (Fam19a2), mRNA [NM_182807]	ENSMUSG00000044071	268354	-7.06501	8.31576	-19.8018	2.65336e-06	9.80529e-05	5.7298	DOWN
20275	A_51_P511608	Mtag2	NR_027802	ref|Mus musculus metastasis associated gene 2 (Mtag2), non-coding RNA [NR_027802]	ENSMUSG00000091510	50994	-3.1945	6.19298	-19.7994	2.65508e-06	9.80529e-05	5.72918	DOWN
24648	A_51_P282609	Grik1	NM_146072	ref|Mus musculus glutamate receptor, ionotropic, kainate 1 (Grik1), transcript variant 1, mRNA [NM_146072]	ENSMUSG00000022935	14805	-3.07647	5.10776	-19.7898	2.66202e-06	9.81333e-05	5.72669	DOWN
7622	A_52_P377693	Fsd1	NM_183178	ref|Mus musculus fibronectin type 3 and SPRY domain-containing protein (Fsd1), mRNA [NM_183178]	ENSMUSG00000011589	240121	-5.81	8.68932	-19.7707	2.67595e-06	9.82609e-05	5.7217	DOWN
14475	A_55_P2001262	ENSMUST00000109711	ENSMUST00000109711	ens|predicted gene, 17000 [Source:MGI Symbol;Acc:MGI:4439924] [ENSMUST00000109711]	ENSMUST00000109711	NA	3.85097	5.60179	19.7677	2.67814e-06	9.82609e-05	5.72092	UP
28480	A_51_P450459	Ccdc74a	AK009347	gb|Mus musculus adult male tongue cDNA, RIKEN full-length enriched library, clone:2310015A05 product:hypothetical protein, full insert sequence. [AK009347]	ENSMUSG00000041617	72315	-3.49849	5.47628	-19.7642	2.68071e-06	9.82609e-05	5.72	DOWN
18630	A_55_P2011506	Pcdh9	NM_001081377	ref|Mus musculus protocadherin 9 (Pcdh9), mRNA [NM_001081377]	ENSMUSG00000055421	211712	-3.71561	6.97811	-19.7591	2.68452e-06	9.82609e-05	5.71865	DOWN
785	A_51_P211260	Dscaml1	NM_001081270	ref|Mus musculus Down syndrome cell adhesion molecule-like 1 (Dscaml1), mRNA [NM_001081270]	ENSMUSG00000032087	114873	-3.09961	6.30088	-19.7073	2.72287e-06	9.94263e-05	5.70509	DOWN
34462	A_51_P292527	P4htm	NM_028944	ref|Mus musculus prolyl 4-hydroxylase, transmembrane (endoplasmic reticulum) (P4htm), mRNA [NM_028944]	ENSMUSG00000006675	74443	-3.35061	10.3848	-19.7017	2.72705e-06	9.94263e-05	5.70362	DOWN
1375	A_55_P2132902	Gprasp1	NM_026081	ref|Mus musculus G protein-coupled receptor associated sorting protein 1 (Gprasp1), transcript variant 1, mRNA [NM_026081]	ENSMUSG00000043384	67298	-4.36947	12.2039	-19.6967	2.7308e-06	9.94263e-05	5.7023	DOWN
3553	A_51_P473953	Arhgef26	NM_001081295	ref|Mus musculus Rho guanine nucleotide exchange factor (GEF) 26 (Arhgef26), mRNA [NM_001081295]	ENSMUSG00000036885	622434	-3.45201	8.51341	-19.6805	2.74295e-06	9.96928e-05	5.69806	DOWN
13894	A_55_P1984815	Snph	NM_198214	ref|Mus musculus syntaphilin (Snph), mRNA [NM_198214]	ENSMUSG00000027457	241727	-6.16408	10.5983	-19.6672	2.75297e-06	9.98812e-05	5.69457	DOWN
26088	A_51_P163354	Ogdhl	NM_001081130	ref|Mus musculus oxoglutarate dehydrogenase-like (Ogdhl), nuclear gene encoding mitochondrial protein, mRNA [NM_001081130]	ENSMUSG00000021913	239017	-3.54269	7.0865	-19.6583	2.75973e-06	9.99508e-05	5.69222	DOWN
4582	A_55_P2101367	Ppfia3	NM_029741	ref|Mus musculus protein tyrosine phosphatase, receptor type, f polypeptide (PTPRF), interacting protein (liprin), alpha 3 (Ppfia3), mRNA [NM_029741]	ENSMUSG00000003863	76787	-3.70597	10.3024	-19.6228	2.7868e-06	0.000100562	5.68287	DOWN
11233	A_66_P125538	Gpc5	NM_175500	ref|Mus musculus glypican 5 (Gpc5), mRNA [NM_175500]	ENSMUSG00000022112	103978	-4.32538	6.62849	-19.6204	2.78863e-06	0.000100562	5.68224	DOWN
29466	A_52_P384718	Cdh10	NM_009865	ref|Mus musculus cadherin 10 (Cdh10), mRNA [NM_009865]	ENSMUSG00000022321	320873	-4.36379	7.28541	-19.6136	2.79386e-06	0.000100562	5.68045	DOWN
9546	A_51_P458008	Wscd1	ENSMUST00000138339	ens|WSC domain containing 1 [Source:MGI Symbol;Acc:MGI:2448493] [ENSMUST00000138339]	ENSMUSG00000020811	216881	-3.1213	6.26176	-19.6107	2.79609e-06	0.000100562	5.67969	DOWN
8426	A_55_P2010116	Rab27b	NM_030554	ref|Mus musculus RAB27b, member RAS oncogene family (Rab27b), transcript variant 1, mRNA [NM_030554]	ENSMUSG00000024511	80718	-3.58517	7.86774	-19.586	2.81521e-06	0.000100908	5.67315	DOWN
2598	A_52_P443334	Cd8a	NM_001081110	ref|Mus musculus CD8 antigen, alpha chain (Cd8a), transcript variant 1, mRNA [NM_001081110]	ENSMUSG00000053977	12525	3.19289	4.53699	19.5856	2.8155e-06	0.000100908	5.67305	UP
30876	A_51_P414879	ENSMUST00000103304	ENSMUST00000103304	ens|immunoglobulin kappa variable 1-133 [Source:MGI Symbol;Acc:MGI:3648380] [ENSMUST00000103304]	ENSMUST00000103304	NA	4.82594	4.85692	19.5755	2.82343e-06	0.000101017	5.67036	UP
20605	A_51_P162162	Inmt	NM_009349	ref|Mus musculus indolethylamine N-methyltransferase (Inmt), mRNA [NM_009349]	ENSMUSG00000003477	21743	7.29313	8.95674	19.5539	2.8403e-06	0.000101346	5.66465	UP
6905	A_55_P2032750	Cpt1c	NM_153679	ref|Mus musculus carnitine palmitoyltransferase 1c (Cpt1c), mRNA [NM_153679]	ENSMUSG00000007783	78070	-3.46441	8.83135	-19.5512	2.84245e-06	0.000101346	5.66392	DOWN
1220	A_51_P406796	Sult4a1	NM_013873	ref|Mus musculus sulfotransferase family 4A, member 1 (Sult4a1), mRNA [NM_013873]	ENSMUSG00000018865	29859	-3.77041	8.59049	-19.5356	2.85473e-06	0.000101609	5.65978	DOWN
33643	A_55_P1953169	Saa3	NM_011315	ref|Mus musculus serum amyloid A 3 (Saa3), mRNA [NM_011315]	ENSMUSG00000040026	20210	5.51034	5.34793	19.5145	2.87142e-06	0.000102027	5.65419	UP
16944	A_55_P2273518	AW495222	XR_106820	ref|PREDICTED: Mus musculus expressed sequence AW495222 (AW495222), partial miscRNA [XR_106820]	ENSMUSG00000087334	105364	-3.84886	5.83473	-19.507	2.87743e-06	0.000102065	5.65218	DOWN
18590	A_52_P569023	Sphkap	NM_172430	ref|Mus musculus SPHK1 interactor, AKAP domain containing (Sphkap), mRNA [NM_172430]	ENSMUSG00000026163	77629	-4.81484	6.87515	-19.4937	2.88799e-06	0.000102264	5.64866	DOWN
35911	A_51_P397934	Grin3b	NM_130455	ref|Mus musculus glutamate receptor, ionotropic, NMDA3B (Grin3b), mRNA [NM_130455]	ENSMUSG00000035745	170483	-4.95605	8.90823	-19.4835	2.89619e-06	0.000102378	5.64594	DOWN
3257	A_55_P2044242	Slc13a5	NM_001004148	ref|Mus musculus solute carrier family 13 (sodium-dependent citrate transporter), member 5 (Slc13a5), mRNA [NM_001004148]	ENSMUSG00000020805	237831	-4.64543	7.1727	-19.4459	2.92657e-06	0.000103269	5.63591	DOWN
36675	A_55_P2122020	Klf4	NM_010637	ref|Mus musculus Kruppel-like factor 4 (gut) (Klf4), mRNA [NM_010637]	ENSMUSG00000003032	16600	3.25095	8.03923	19.44	2.93139e-06	0.000103269	5.63433	UP
11066	A_51_P436594	1700003E16Rik	NM_027948	ref|Mus musculus RIKEN cDNA 1700003E16 gene (1700003E16Rik), mRNA [NM_027948]	ENSMUSG00000030030	71837	-3.74208	6.60177	-19.4171	2.95007e-06	0.00010375	5.62823	DOWN
26115	A_66_P134542	Anln	NM_028390	ref|Mus musculus anillin, actin binding protein (Anln), mRNA [NM_028390]	ENSMUSG00000036777	68743	-5.26553	11.4339	-19.3643	2.99386e-06	0.000105111	5.61405	DOWN
7270	A_52_P365342	Lrrn2	NM_010732	ref|Mus musculus leucine rich repeat protein 2, neuronal (Lrrn2), mRNA [NM_010732]	ENSMUSG00000026443	16980	-3.9772	9.58637	-19.3396	3.01452e-06	0.000105657	5.60743	DOWN
17498	A_51_P292490	Ttbk2	NM_001024856	ref|Mus musculus tau tubulin kinase 2 (Ttbk2), transcript variant 2, mRNA [NM_001024856]	ENSMUSG00000090100	140810	-3.7842	11.1447	-19.3215	3.02986e-06	0.000106014	5.60254	DOWN
16330	A_55_P2074694	Ephx4	NM_001001804	ref|Mus musculus epoxide hydrolase 4 (Ephx4), mRNA [NM_001001804]	ENSMUSG00000033805	384214	-3.96453	9.79129	-19.3038	3.04484e-06	0.000106301	5.59779	DOWN
12420	A_52_P121491	Msrb3	NM_177092	ref|Mus musculus methionine sulfoxide reductase B3 (Msrb3), nuclear gene encoding mitochondrial protein, mRNA [NM_177092]	ENSMUSG00000051236	320183	4.12056	6.7417	19.2975	3.05025e-06	0.000106301	5.59608	UP
2469	A_51_P476960	Csmd3	NM_001081391	ref|Mus musculus CUB and Sushi multiple domains 3 (Csmd3), mRNA [NM_001081391]	ENSMUSG00000022311	239420	-3.12475	5.24194	-19.2937	3.05351e-06	0.000106301	5.59505	DOWN
19362	A_51_P515605	Col3a1	NM_009930	ref|Mus musculus collagen, type III, alpha 1 (Col3a1), mRNA [NM_009930]	ENSMUSG00000026043	12825	6.18228	8.65535	19.2779	3.06703e-06	0.000106592	5.59079	UP
6527	A_55_P1992889	Serping1	NM_009776	ref|Mus musculus serine (or cysteine) peptidase inhibitor, clade G, member 1 (Serping1), mRNA [NM_009776]	ENSMUSG00000023224	12258	4.7885	9.82931	19.2077	3.12807e-06	0.000108531	5.57178	UP
18463	A_51_P252565	Alox15	NM_009660	ref|Mus musculus arachidonate 15-lipoxygenase (Alox15), mRNA [NM_009660]	ENSMUSG00000018924	11687	4.50749	5.15448	19.1903	3.14342e-06	0.000108881	5.56705	UP
5625	A_66_P125741	Ripply2	NM_001037907	ref|Mus musculus ripply2 homolog (zebrafish) (Ripply2), mRNA [NM_001037907]	ENSMUSG00000047897	382089	-3.32546	7.76022	-19.1719	3.15973e-06	0.000109156	5.56205	DOWN
2197	A_55_P2013893	Cntn4	NM_001109751	ref|Mus musculus contactin 4 (Cntn4), transcript variant 3, mRNA [NM_001109751]	ENSMUSG00000064293	269784	-2.97984	5.85862	-19.1637	3.16708e-06	0.000109156	5.55981	DOWN
21393	A_55_P2148655	Paqr6	NM_198410	ref|Mus musculus progestin and adipoQ receptor family member VI (Paqr6), mRNA [NM_198410]	ENSMUSG00000041423	68957	-3.80806	10.4231	-19.1635	3.16723e-06	0.000109156	5.55976	DOWN
11033	A_51_P278653	Rprm	NM_023396	ref|Mus musculus reprimo, TP53 dependent G2 arrest mediator candidate (Rprm), mRNA [NM_023396]	ENSMUSG00000075334	67874	-6.16869	7.87761	-19.1498	3.17947e-06	0.000109395	5.55604	DOWN
16189	A_51_P449325	H2-Oa	NM_008206	ref|Mus musculus histocompatibility 2, O region alpha locus (H2-Oa), mRNA [NM_008206]	ENSMUSG00000024334	15001	3.29074	7.54229	19.1433	3.1853e-06	0.000109413	5.55427	UP
35865	A_55_P2374381	A230001M10Rik	NR_040391	ref|Mus musculus RIKEN cDNA A230001M10 gene (A230001M10Rik), non-coding RNA [NR_040391]	ENSMUSG00000105891	319951	-4.24332	6.18055	-19.115	3.21087e-06	0.000110108	5.54654	DOWN
8813	A_52_P442169	Bsn	NM_007567	ref|Mus musculus bassoon (Bsn), mRNA [NM_007567]	ENSMUSG00000032589	12217	-5.82944	8.97685	-19.1016	3.22305e-06	0.000110152	5.54288	DOWN
4295	A_55_P2236268	Syt16	NM_172804	ref|Mus musculus synaptotagmin XVI (Syt16), mRNA [NM_172804]	ENSMUSG00000044912	238266	-3.78109	6.93554	-19.0932	3.2307e-06	0.000110152	5.54058	DOWN
5788	A_55_P2147831	Gimap4	NM_174990	ref|Mus musculus GTPase, IMAP family member 4 (Gimap4), transcript variant 1, mRNA [NM_174990]	ENSMUSG00000054435	107526	3.61494	5.73365	19.0916	3.23218e-06	0.000110152	5.54014	UP
6147	A_55_P2274383	2610316D01Rik	AK012035	gb|Mus musculus 10 days embryo whole body cDNA, RIKEN full-length enriched library, clone:2610316D01 product:unclassifiable, full insert sequence. [AK012035]	ENSMUSG00000097040	72511	-3.02245	5.81789	-19.0902	3.23349e-06	0.000110152	5.53975	DOWN
14560	A_55_P2154982	Cd8b1	NM_009858	ref|Mus musculus CD8 antigen, beta chain 1 (Cd8b1), mRNA [NM_009858]	ENSMUSG00000053044	12526	3.62795	5.17176	19.0718	3.25036e-06	0.000110351	5.53471	UP
11955	A_55_P2075627	Apc2	NM_011789	ref|Mus musculus adenomatosis polyposis coli 2 (Apc2), mRNA [NM_011789]	ENSMUSG00000020135	23805	-4.45412	11.493	-19.0699	3.25213e-06	0.000110351	5.53418	DOWN
32297	A_51_P185660	Ccl9	NM_011338	ref|Mus musculus chemokine (C-C motif) ligand 9 (Ccl9), mRNA [NM_011338]	ENSMUSG00000019122	20308	3.30354	8.54776	19.0664	3.25535e-06	0.000110351	5.53322	UP
20776	A_55_P2018457	Hdac7	NM_001204276	ref|Mus musculus histone deacetylase 7 (Hdac7), transcript variant 2, mRNA [NM_001204276]	ENSMUSG00000022475	56233	3.35212	9.37181	19.0509	3.2697e-06	0.000110565	5.52897	UP
1269	A_66_P116998	Tro	NM_001002272	ref|Mus musculus trophinin (Tro), transcript variant 1, mRNA [NM_001002272]	ENSMUSG00000025272	56191	-4.06106	8.40419	-19.048	3.27239e-06	0.000110565	5.52817	DOWN
36840	A_55_P1954196	C1ql3	NM_153155	ref|Mus musculus C1q-like 3 (C1ql3), mRNA [NM_153155]	ENSMUSG00000049630	227580	-4.91865	7.53397	-19.0198	3.29864e-06	0.000111097	5.52043	DOWN
8314	A_55_P2100103	Htr7	NM_008315	ref|Mus musculus 5-hydroxytryptamine (serotonin) receptor 7 (Htr7), mRNA [NM_008315]	ENSMUSG00000024798	15566	-2.91852	6.4379	-19.0195	3.29889e-06	0.000111097	5.52036	DOWN
31738	A_52_P987201	Pdzrn4	NM_001164593	ref|Mus musculus PDZ domain containing RING finger 4 (Pdzrn4), transcript variant 1, mRNA [NM_001164593]	ENSMUSG00000036218	239618	-3.1814	6.76316	-19.0084	3.30932e-06	0.000111266	5.5173	DOWN
25123	A_55_P1953646	Nkx6-1	NM_144955	ref|Mus musculus NK6 homeobox 1 (Nkx6-1), mRNA [NM_144955]	ENSMUSG00000035187	18096	-3.16686	8.34115	-18.9952	3.32182e-06	0.00011133	5.51365	DOWN
26678	A_55_P2169586	Ccdc80	NM_026439	ref|Mus musculus coiled-coil domain containing 80 (Ccdc80), mRNA [NM_026439]	ENSMUSG00000022665	67896	3.32135	7.85731	18.995	3.32199e-06	0.00011133	5.5136	UP
11556	A_55_P2031836	Gpr85	NM_145066	ref|Mus musculus G protein-coupled receptor 85 (Gpr85), mRNA [NM_145066]	ENSMUSG00000048216	64450	-4.88254	7.8026	-18.9834	3.33291e-06	0.000111465	5.51042	DOWN
13910	A_52_P235448	BC030500	NM_173411	ref|Mus musculus cDNA sequence BC030500 (BC030500), mRNA [NM_173411]	ENSMUSG00000049946	234290	-4.03011	5.73484	-18.9793	3.33681e-06	0.000111465	5.50928	DOWN
9418	A_55_P2019520	Cma2	NM_001024714	ref|Mus musculus chymase 2, mast cell (Cma2), mRNA [NM_001024714]	ENSMUSG00000068289	545055	3.33003	7.39995	18.9718	3.34395e-06	0.000111522	5.50721	UP
14292	A_52_P439263	Ugt8a	NM_011674	ref|Mus musculus UDP galactosyltransferase 8A (Ugt8a), mRNA [NM_011674]	ENSMUSG00000032854	22239	-6.84311	9.23306	-18.9571	3.358e-06	0.000111811	5.50315	DOWN
22589	A_55_P2187067	ENSMUST00000103317	ENSMUST00000103317	ens|predicted gene, 16797 [Source:MGI Symbol;Acc:MGI:4439721] [ENSMUST00000103317]	ENSMUST00000103317	NA	4.86235	5.71501	18.9281	3.38586e-06	0.000112468	5.49513	UP
8785	A_55_P2017759	Evi2a	NM_001033711	ref|Mus musculus ecotropic viral integration site 2a (Evi2a), transcript variant 1, mRNA [NM_001033711]	ENSMUSG00000078771	14017	-4.02707	10.9297	-18.9252	3.38865e-06	0.000112468	5.49433	DOWN
26151	A_55_P2167347	ENSMUST00000103310	ENSMUST00000103310	ens|immunoglobulin kappa variable 14-126 [Source:MGI Symbol;Acc:MGI:3643131] [ENSMUST00000103310]	ENSMUST00000103310	NA	5.30579	5.19612	18.8917	3.42122e-06	0.000112933	5.48505	UP
17085	A_55_P2048085	Klhl14	NM_001081403	ref|Mus musculus kelch-like 14 (Drosophila) (Klhl14), mRNA [NM_001081403]	ENSMUSG00000042514	225266	-3.89967	6.85761	-18.8904	3.42252e-06	0.000112933	5.48468	DOWN
12804	A_55_P1989921	Eml2	NM_028153	ref|Mus musculus echinoderm microtubule associated protein like 2 (Eml2), transcript variant 1, mRNA [NM_028153]	ENSMUSG00000040811	72205	-3.12322	12.6119	-18.8899	3.42297e-06	0.000112933	5.48455	DOWN
4561	A_66_P122559	Myct1	NM_026793	ref|Mus musculus myc target 1 (Myct1), mRNA [NM_026793]	ENSMUSG00000046916	68632	3.96746	5.94963	18.8838	3.42896e-06	0.000112933	5.48285	UP
24770	A_55_P2130178	Fn1	NM_010233	ref|Mus musculus fibronectin 1 (Fn1), mRNA [NM_010233]	ENSMUSG00000026193	14268	3.70202	10.9559	18.8735	3.43905e-06	0.000112933	5.48	UP
27468	A_52_P453785	Cthrc1	NM_026778	ref|Mus musculus collagen triple helix repeat containing 1 (Cthrc1), mRNA [NM_026778]	ENSMUSG00000054196	68588	-3.59838	6.60312	-18.8735	3.43909e-06	0.000112933	5.47999	DOWN
4912	A_55_P2079175	Dnm1	NM_010065	ref|Mus musculus dynamin 1 (Dnm1), mRNA [NM_010065]	ENSMUSG00000026825	13429	-4.30367	11.8578	-18.8716	3.44093e-06	0.000112933	5.47947	DOWN
7556	A_51_P519008	Mkx	NM_177595	ref|Mus musculus mohawk homeobox (Mkx), mRNA [NM_177595]	ENSMUSG00000061013	210719	-4.60527	6.57619	-18.8616	3.45082e-06	0.000113077	5.47668	DOWN
32543	A_52_P676947	Tacr3	NM_021382	ref|Mus musculus tachykinin receptor 3 (Tacr3), mRNA [NM_021382]	ENSMUSG00000028172	21338	-5.35636	6.11989	-18.8478	3.46451e-06	0.000113306	5.47283	DOWN
8514	A_55_P1978371	Chd5	NM_001081376	ref|Mus musculus chromodomain helicase DNA binding protein 5 (Chd5), transcript variant 1, mRNA [NM_001081376]	ENSMUSG00000005045	269610	-4.54684	10.0138	-18.8435	3.46877e-06	0.000113306	5.47164	DOWN
11701	A_52_P556433	Calb2	NM_007586	ref|Mus musculus calbindin 2 (Calb2), mRNA [NM_007586]	ENSMUSG00000003657	12308	-5.63715	7.65816	-18.824	3.48823e-06	0.000113762	5.4662	DOWN
31307	A_55_P2025538	Ano4	NM_178773	ref|Mus musculus anoctamin 4 (Ano4), mRNA [NM_178773]	ENSMUSG00000035189	320091	-4.87649	7.4682	-18.8069	3.5054e-06	0.000114141	5.46143	DOWN
24780	A_51_P383001	Meox2	NM_008584	ref|Mus musculus mesenchyme homeobox 2 (Meox2), mRNA [NM_008584]	ENSMUSG00000036144	17286	6.52278	6.5467	18.7828	3.52966e-06	0.00011475	5.45472	UP
16956	A_55_P1979364	ENSMUST00000103550	ENSMUST00000103550	ens|immunoglobulin heavy variable 1-83 [Source:MGI Symbol;Acc:MGI:3648939] [ENSMUST00000103550]	ENSMUST00000103550	NA	4.23885	5.48534	18.7652	3.5476e-06	0.000115023	5.44978	UP
4640	A_55_P2096375	Dydc2	NM_027717	ref|Mus musculus DPY30 domain containing 2 (Dydc2), mRNA [NM_027717]	ENSMUSG00000021791	71200	-3.27483	6.28914	-18.7623	3.5506e-06	0.000115023	5.44896	DOWN
23835	A_66_P118906	Adora2b	NM_007413	ref|Mus musculus adenosine A2b receptor (Adora2b), mRNA [NM_007413]	ENSMUSG00000018500	11541	-3.02469	7.78762	-18.757	3.556e-06	0.000115023	5.44748	DOWN
13527	A_55_P2124791	Col18a1	NM_001109991	ref|Mus musculus collagen, type XVIII, alpha 1 (Col18a1), transcript variant 1, mRNA [NM_001109991]	ENSMUSG00000001435	12822	3.28357	8.45047	18.7528	3.56034e-06	0.000115023	5.4463	UP
22455	A_51_P490023	Tubb2a	NM_009450	ref|Mus musculus tubulin, beta 2A (Tubb2a), mRNA [NM_009450]	ENSMUSG00000058672	22151	-3.36007	14.9079	-18.7204	3.59367e-06	0.000115796	5.43722	DOWN
26231	A_55_P2045788	Pnma3	NM_153169	ref|Mus musculus paraneoplastic antigen MA3 (Pnma3), mRNA [NM_153169]	ENSMUSG00000046287	245468	-3.72737	8.11181	-18.7186	3.5955e-06	0.000115796	5.43673	DOWN
1333	A_51_P136411	Dgki	NM_001081206	ref|Mus musculus diacylglycerol kinase, iota (Dgki), mRNA [NM_001081206]	ENSMUSG00000038665	320127	-3.44877	6.3662	-18.7052	3.60953e-06	0.000115948	5.43293	DOWN
6866	A_55_P1965219	Syt6	NM_018800	ref|Mus musculus synaptotagmin VI (Syt6), mRNA [NM_018800]	ENSMUSG00000027849	54524	-4.47092	8.30105	-18.6984	3.61656e-06	0.000115948	5.43104	DOWN
5102	A_52_P25420	Srcin1	NM_018873	ref|Mus musculus SRC kinase signaling inhibitor 1 (Srcin1), mRNA [NM_018873]	ENSMUSG00000038453	56013	-3.32483	7.33686	-18.6907	3.62461e-06	0.000115948	5.42887	DOWN
36053	A_55_P2045055	Clec10a	NM_001204252	ref|Mus musculus C-type lectin domain family 10, member A (Clec10a), transcript variant 1, mRNA [NM_001204252]	ENSMUSG00000000318	17312	5.79012	5.6227	18.6898	3.62557e-06	0.000115948	5.42861	UP
35644	A_51_P161890	Fcgrt	NM_010189	ref|Mus musculus Fc receptor, IgG, alpha chain transporter (Fcgrt), mRNA [NM_010189]	ENSMUSG00000003420	14132	3.03366	9.47687	18.6862	3.6293e-06	0.000115948	5.42761	UP
448	A_51_P141012	Slitrk1	NM_199065	ref|Mus musculus SLIT and NTRK-like family, member 1 (Slitrk1), mRNA [NM_199065]	ENSMUSG00000075478	76965	-4.6402	7.19509	-18.6704	3.64596e-06	0.000115948	5.42314	DOWN
37588	A_52_P88007	Slc6a7	NM_201353	ref|Mus musculus solute carrier family 6 (neurotransmitter transporter, L-proline), member 7 (Slc6a7), mRNA [NM_201353]	ENSMUSG00000052026	240332	-3.7818	7.02895	-18.6688	3.6476e-06	0.000115948	5.42271	DOWN
24070	A_55_P2051229	Gpr132	NM_019925	ref|Mus musculus G protein-coupled receptor 132 (Gpr132), mRNA [NM_019925]	ENSMUSG00000021298	56696	4.75264	6.12227	18.6681	3.64833e-06	0.000115948	5.42251	UP
17138	A_55_P2277475	9330179D12Rik	NR_040273	ref|Mus musculus RIKEN cDNA 9330179D12 gene (9330179D12Rik), transcript variant 1, non-coding RNA [NR_040273]	ENSMUSG00000097166	77558	-3.38591	7.42595	-18.6594	3.65755e-06	0.000115948	5.42005	DOWN
9372	A_55_P2023542	Ccr7	NM_007719	ref|Mus musculus chemokine (C-C motif) receptor 7 (Ccr7), mRNA [NM_007719]	ENSMUSG00000037944	12775	5.70606	6.33239	18.6542	3.66305e-06	0.000115948	5.41858	UP
3241	A_55_P2086128	Fa2h	NM_178086	ref|Mus musculus fatty acid 2-hydroxylase (Fa2h), mRNA [NM_178086]	ENSMUSG00000033579	338521	-6.47192	9.89577	-18.6497	3.66788e-06	0.000115948	5.4173	DOWN
7113	A_52_P508991	Fmo1	NM_010231	ref|Mus musculus flavin containing monooxygenase 1 (Fmo1), mRNA [NM_010231]	ENSMUSG00000040181	14261	5.60332	7.46349	18.6478	3.66989e-06	0.000115948	5.41677	UP
12640	A_55_P2089422	Olig3	NM_053008	ref|Mus musculus oligodendrocyte transcription factor 3 (Olig3), mRNA [NM_053008]	ENSMUSG00000045591	94222	-3.77356	5.68746	-18.6421	3.67595e-06	0.000115948	5.41516	DOWN
34283	A_55_P2179587	Celsr3	NM_080437	ref|Mus musculus cadherin, EGF LAG seven-pass G-type receptor 3 (flamingo homolog, Drosophila) (Celsr3), mRNA [NM_080437]	ENSMUSG00000023473	107934	-3.62721	9.41774	-18.6393	3.67884e-06	0.000115948	5.41439	DOWN
4335	A_51_P499854	Ghr	NM_010284	ref|Mus musculus growth hormone receptor (Ghr), transcript variant 1, mRNA [NM_010284]	ENSMUSG00000055737	14600	4.02661	9.44371	18.6222	3.69715e-06	0.00011627	5.40955	UP
8905	A_52_P214408	Gm5148	NM_198657	ref|Mus musculus predicted gene 5148 (Gm5148), mRNA [NM_198657]	ENSMUSG00000058174	381438	-3.50705	6.02656	-18.6193	3.70032e-06	0.00011627	5.40871	DOWN
2059	A_55_P1965694	Gabrg2	NM_008073	ref|Mus musculus gamma-aminobutyric acid (GABA) A receptor, subunit gamma 2 (Gabrg2), transcript variant 1, mRNA [NM_008073]	ENSMUSG00000020436	14406	-4.42693	7.01459	-18.5778	3.74507e-06	0.000117497	5.39697	DOWN
23066	A_66_P110742	ENSMUST00000067743	ENSMUST00000067743	ens|predicted gene 9949 [Source:MGI Symbol;Acc:MGI:3647947] [ENSMUST00000067743]	ENSMUST00000067743	NA	3.45852	5.10139	18.5632	3.76097e-06	0.000117785	5.39284	UP
2554	A_55_P1994147	Zar1	NM_174877	ref|Mus musculus zygote arrest 1 (Zar1), mRNA [NM_174877]	ENSMUSG00000063935	317755	-4.05182	7.11967	-18.5493	3.77622e-06	0.000117785	5.38888	DOWN
14413	A_55_P2087622	Il4i1	NM_010215	ref|Mus musculus interleukin 4 induced 1 (Il4i1), mRNA [NM_010215]	ENSMUSG00000074141	14204	3.69781	8.48783	18.5441	3.78203e-06	0.000117785	5.38738	UP
14089	A_55_P1956418	Efr3b	NM_001082483	ref|Mus musculus EFR3 homolog B (S. cerevisiae) (Efr3b), mRNA [NM_001082483]	ENSMUSG00000020658	668212	-4.23166	11.9691	-18.5434	3.78271e-06	0.000117785	5.38721	DOWN
11909	A_55_P2063880	C7	ENSMUST00000110689	ens|complement component 7 [Source:MGI Symbol;Acc:MGI:88235] [ENSMUST00000110689]	ENSMUSG00000079105	109828	3.40895	4.7233	18.5434	3.78278e-06	0.000117785	5.38719	UP
22791	A_55_P2016237	Hand2	NM_010402	ref|Mus musculus heart and neural crest derivatives expressed transcript 2 (Hand2), mRNA [NM_010402]	ENSMUSG00000038193	15111	3.99496	5.18516	18.5359	3.79097e-06	0.000117863	5.38508	UP
11543	A_51_P420859	Slc30a3	NM_011773	ref|Mus musculus solute carrier family 30 (zinc transporter), member 3 (Slc30a3), mRNA [NM_011773]	ENSMUSG00000029151	22784	-4.39539	6.71762	-18.5297	3.7979e-06	0.000117901	5.38329	DOWN
23211	A_51_P306527	Ywhah	NM_011738	ref|Mus musculus tyrosine 3-monooxygenase/tryptophan 5-monooxygenase activation protein, eta polypeptide (Ywhah), mRNA [NM_011738]	ENSMUSG00000018965	22629	-2.97171	14.9495	-18.5056	3.82462e-06	0.000118552	5.37644	DOWN
19002	A_55_P1966274	Pdzd4	NM_001029868	ref|Mus musculus PDZ domain containing 4 (Pdzd4), mRNA [NM_001029868]	ENSMUSG00000002006	245469	-3.99931	10.1371	-18.4756	3.85826e-06	0.000119415	5.36787	DOWN
27625	A_66_P134457	Sntg1	NM_027671	ref|Mus musculus syntrophin, gamma 1 (Sntg1), mRNA [NM_027671]	ENSMUSG00000025909	71096	-4.58166	7.17265	-18.4576	3.87862e-06	0.000119866	5.36272	DOWN
36096	A_51_P292008	Gpx3	NM_008161	ref|Mus musculus glutathione peroxidase 3 (Gpx3), transcript variant 2, mRNA [NM_008161]	ENSMUSG00000018339	14778	4.53531	10.5886	18.4369	3.90219e-06	0.000120414	5.35679	UP
9639	A_52_P472319	Plxnd1	NM_026376	ref|Mus musculus plexin D1 (Plxnd1), mRNA [NM_026376]	ENSMUSG00000030123	67784	2.91417	8.14489	18.4236	3.91743e-06	0.000120479	5.35297	UP
12135	A_55_P1997569	Nkx6-2	NM_183248	ref|Mus musculus NK6 homeobox 2 (Nkx6-2), transcript variant 1, mRNA [NM_183248]	ENSMUSG00000041309	14912	-5.51971	7.56833	-18.4164	3.92569e-06	0.000120479	5.35091	DOWN
22995	A_55_P2054062	Chst2	NM_018763	ref|Mus musculus carbohydrate sulfotransferase 2 (Chst2), mRNA [NM_018763]	ENSMUSG00000033350	54371	-3.82467	6.86789	-18.4156	3.9266e-06	0.000120479	5.35068	DOWN
16790	A_55_P1971179	Cd1d1	NM_007639	ref|Mus musculus CD1d1 antigen (Cd1d1), mRNA [NM_007639]	ENSMUSG00000028076	12479	4.35898	8.96737	18.4053	3.93845e-06	0.000120479	5.34773	UP
25147	A_55_P2002893	Pfkfb1	NM_008824	ref|Mus musculus 6-phosphofructo-2-kinase/fructose-2,6-biphosphatase 1 (Pfkfb1), mRNA [NM_008824]	ENSMUSG00000025271	18639	6.30125	8.38537	18.3881	3.95833e-06	0.000120479	5.3428	UP
36364	A_51_P303217	Ucma	NM_026754	ref|Mus musculus upper zone of growth plate and cartilage matrix associated (Ucma), transcript variant 1, mRNA [NM_026754]	ENSMUSG00000026668	68527	-5.59924	6.99442	-18.3863	3.96051e-06	0.000120479	5.34226	DOWN
37930	A_51_P377528	Oprk1	NM_011011	ref|Mus musculus opioid receptor, kappa 1 (Oprk1), transcript variant 2, mRNA [NM_011011]	ENSMUSG00000025905	18387	-3.59552	5.98802	-18.3846	3.96249e-06	0.000120479	5.34177	DOWN
26390	A_51_P144264	Klf2	NM_008452	ref|Mus musculus Kruppel-like factor 2 (lung) (Klf2), mRNA [NM_008452]	ENSMUSG00000055148	16598	3.60649	9.56655	18.3818	3.96564e-06	0.000120479	5.34099	UP
22060	A_55_P2161702	Nrip2	NM_021717	ref|Mus musculus nuclear receptor interacting protein 2 (Nrip2), transcript variant 2, mRNA [NM_021717]	ENSMUSG00000001520	60345	-3.58631	8.50255	-18.3752	3.97344e-06	0.000120479	5.33907	DOWN
5725	A_55_P2124233	Vsig8	NM_177723	ref|Mus musculus V-set and immunoglobulin domain containing 8 (Vsig8), transcript variant 1, mRNA [NM_177723]	ENSMUSG00000049598	240916	-3.88394	6.97498	-18.3729	3.97604e-06	0.000120479	5.33843	DOWN
9577	A_55_P2027900	Gabra2	AK046953	gb|Mus musculus 10 days neonate cerebellum cDNA, RIKEN full-length enriched library, clone:B930007L07 product:gamma-aminobutyric acid (GABA-A) receptor, subunit alpha 2, full insert sequence. [AK046953]	ENSMUSG00000000560	14395	-6.53144	8.40803	-18.3667	3.98327e-06	0.000120479	5.33664	DOWN
10884	A_55_P2124441	Zdbf2	NM_028673	ref|Mus musculus zinc finger, DBF-type containing 2 (Zdbf2), mRNA [NM_028673]	ENSMUSG00000027520	73884	-2.8502	5.12312	-18.3662	3.98392e-06	0.000120479	5.33648	DOWN
27734	A_51_P387235	Nampt	NM_021524	ref|Mus musculus nicotinamide phosphoribosyltransferase (Nampt), mRNA [NM_021524]	ENSMUSG00000020572	59027	3.58666	10.4666	18.3659	3.9843e-06	0.000120479	5.33639	UP
8874	A_51_P460048	Cnrip1	NM_029861	ref|Mus musculus cannabinoid receptor interacting protein 1 (Cnrip1), mRNA [NM_029861]	ENSMUSG00000044629	380686	-3.07685	10.2866	-18.3644	3.98599e-06	0.000120479	5.33597	DOWN
21185	A_52_P258546	Nlgn1	NM_138666	ref|Mus musculus neuroligin 1 (Nlgn1), transcript variant 1, mRNA [NM_138666]	ENSMUSG00000063887	192167	-2.98292	5.51218	-18.3583	3.99319e-06	0.00012052	5.33421	DOWN
6078	A_55_P1974128	Gjd2	NM_010290	ref|Mus musculus gap junction protein, delta 2 (Gjd2), mRNA [NM_010290]	ENSMUSG00000068615	14617	-3.98078	6.22779	-18.3421	4.01227e-06	0.000120838	5.32953	DOWN
9507	A_55_P1960601	Slc4a10	NM_001242380	ref|Mus musculus solute carrier family 4, sodium bicarbonate cotransporter-like, member 10 (Slc4a10), transcript variant 4, mRNA [NM_001242380]	ENSMUSG00000026904	94229	-3.67651	6.54645	-18.339	4.0159e-06	0.000120838	5.32864	DOWN
6195	A_55_P2056112	Myt1l	NM_001093775	ref|Mus musculus myelin transcription factor 1-like (Myt1l), transcript variant 1, mRNA [NM_001093775]	ENSMUSG00000061911	17933	-3.65884	6.82103	-18.3344	4.02129e-06	0.000120838	5.32733	DOWN
18048	A_55_P2070529	Mapk10	NM_001081567	ref|Mus musculus mitogen-activated protein kinase 10 (Mapk10), transcript variant 2, mRNA [NM_001081567]	ENSMUSG00000046709	26414	-4.49913	10.154	-18.3233	4.03453e-06	0.000121059	5.3241	DOWN
17780	A_55_P2129696	Smad9	NM_019483	ref|Mus musculus MAD homolog 9 (Drosophila) (Smad9), mRNA [NM_019483]	ENSMUSG00000027796	55994	-3.69523	7.58804	-18.3168	4.04218e-06	0.000121113	5.32225	DOWN
16627	A_51_P507053	Slc38a1	NM_134086	ref|Mus musculus solute carrier family 38, member 1 (Slc38a1), transcript variant 1, mRNA [NM_134086]	ENSMUSG00000023169	105727	-3.36598	9.16697	-18.303	4.05873e-06	0.000121433	5.31824	DOWN
13472	A_55_P2164609	Gm960	ENSMUST00000096325	ens|predicted gene 960 [Source:MGI Symbol;Acc:MGI:2685806] [ENSMUST00000096325]	ENSMUSG00000071691	381196	-3.79909	6.79752	-18.296	4.06706e-06	0.000121469	5.31622	DOWN
22638	A_55_P2000543	Cd209f	NM_026956	ref|Mus musculus CD209f antigen (Cd209f), mRNA [NM_026956]	ENSMUSG00000051906	69142	5.44806	6.51579	18.289	4.07542e-06	0.000121469	5.31421	UP
24919	A_52_P208649	Cartpt	NM_013732	ref|Mus musculus CART prepropeptide (Cartpt), transcript variant 1, mRNA [NM_013732]	ENSMUSG00000021647	27220	-6.82976	9.40853	-18.2872	4.0776e-06	0.000121469	5.31368	DOWN
774	A_51_P213099	Ntng1	AK053689	gb|Mus musculus 0 day neonate eyeball cDNA, RIKEN full-length enriched library, clone:E130203P04 product:hypothetical protein, full insert sequence. [AK053689]	ENSMUSG00000059857	80883	-3.50696	8.73713	-18.2713	4.0968e-06	0.000121706	5.30907	DOWN
7852	A_55_P1960989	Nlgn2	NM_198862	ref|Mus musculus neuroligin 2 (Nlgn2), mRNA [NM_198862]	ENSMUSG00000051790	216856	-3.73891	12.4464	-18.2708	4.09736e-06	0.000121706	5.30894	DOWN
32469	A_55_P2127243	Tpsb2	NM_010781	ref|Mus musculus tryptase beta 2 (Tpsb2), mRNA [NM_010781]	ENSMUSG00000033825	17229	3.08409	6.04278	18.2529	4.11908e-06	0.000122005	5.30374	UP
10651	A_55_P2085170	Sept6	NM_001177324	ref|Mus musculus septin 6 (Sept6), transcript variant 1, mRNA [NM_001177324]	ENSMUSG00000050379	56526	-3.6961	9.89429	-18.2387	4.13651e-06	0.000122005	5.2996	DOWN
812	A_55_P2044587	Sorcs1	NM_021377	ref|Mus musculus VPS10 domain receptor protein SORCS 1 (Sorcs1), mRNA [NM_021377]	ENSMUSG00000043531	58178	-3.21217	6.80041	-18.2366	4.13906e-06	0.000122005	5.29899	DOWN
4749	A_51_P288295	ENSMUST00000103496	ENSMUST00000103496	ens|immunoglobulin heavy variable V1-7 [Source:MGI Symbol;Acc:MGI:3704122] [ENSMUST00000103496]	ENSMUST00000103496	NA	5.66828	5.89969	18.2352	4.14075e-06	0.000122005	5.29859	UP
3743	A_51_P384318	C1ra	NM_023143	ref|Mus musculus complement component 1, r subcomponent A (C1ra), mRNA [NM_023143]	ENSMUSG00000055172	50909	5.33487	7.28302	18.2328	4.14365e-06	0.000122005	5.2979	UP
4752	A_55_P2067518	Slc13a3	NM_054055	ref|Mus musculus solute carrier family 13 (sodium-dependent dicarboxylate transporter), member 3 (Slc13a3), mRNA [NM_054055]	ENSMUSG00000018459	114644	-4.10077	8.94791	-18.2305	4.14645e-06	0.000122005	5.29724	DOWN
26932	A_55_P2061253	Pou4f2	NM_138944	ref|Mus musculus POU domain, class 4, transcription factor 2 (Pou4f2), mRNA [NM_138944]	ENSMUSG00000031688	18997	-4.65298	5.82875	-18.2258	4.15223e-06	0.000122005	5.29587	DOWN
38167	A_52_P200610	C1qtnf9	NM_183175	ref|Mus musculus C1q and tumor necrosis factor related protein 9 (C1qtnf9), mRNA [NM_183175]	ENSMUSG00000071347	239126	5.59208	5.35148	18.2238	4.15469e-06	0.000122005	5.29529	UP
18785	A_55_P2023637	Prg4	NM_021400	ref|Mus musculus proteoglycan 4 (megakaryocyte stimulating factor, articular superficial zone protein) (Prg4), transcript variant 1, mRNA [NM_021400]	ENSMUSG00000006014	96875	2.94685	4.97879	18.2063	4.17637e-06	0.000122085	5.29017	UP
3881	A_55_P2020331	Camk1g	NM_144817	ref|Mus musculus calcium/calmodulin-dependent protein kinase I gamma (Camk1g), mRNA [NM_144817]	ENSMUSG00000016179	215303	-5.55048	10.8112	-18.2054	4.17747e-06	0.000122085	5.28991	DOWN
2663	A_55_P2046783	Mpped1	NM_172610	ref|Mus musculus metallophosphoesterase domain containing 1 (Mpped1), mRNA [NM_172610]	ENSMUSG00000041708	223726	-3.01928	7.04816	-18.1995	4.18475e-06	0.000122085	5.2882	DOWN
5884	A_55_P2122474	Edil3	AK046885	gb|Mus musculus 10 days neonate cerebellum cDNA, RIKEN full-length enriched library, clone:B930001A02 product:EGF-like repeats and discordin I-like domains 3, full insert sequence. [AK046885]	ENSMUSG00000034488	13612	-4.87447	7.30756	-18.1984	4.18607e-06	0.000122085	5.28789	DOWN
586	A_52_P418489	Tinagl1	NM_023476	ref|Mus musculus tubulointerstitial nephritis antigen-like 1 (Tinagl1), transcript variant 1, mRNA [NM_023476]	ENSMUSG00000028776	94242	3.66909	7.18103	18.1977	4.18697e-06	0.000122085	5.28768	UP
23821	A_55_P2122604	Cbr2	NM_007621	ref|Mus musculus carbonyl reductase 2 (Cbr2), mRNA [NM_007621]	ENSMUSG00000025150	12409	5.8855	7.51538	18.1923	4.1937e-06	0.000122108	5.2861	UP
5200	A_51_P505823	Endod1	NM_028013	ref|Mus musculus endonuclease domain containing 1 (Endod1), mRNA [NM_028013]	ENSMUSG00000037419	71946	-4.36047	12.738	-18.1806	4.20825e-06	0.000122359	5.28269	DOWN
31868	A_51_P133792	Prickle3	NM_175097	ref|Mus musculus prickle homolog 3 (Drosophila) (Prickle3), mRNA [NM_175097]	ENSMUSG00000031145	54630	5.06414	6.78371	18.1703	4.2212e-06	0.000122563	5.27967	UP
28145	A_55_P1972187	Slc25a14	NM_011398	ref|Mus musculus solute carrier family 25 (mitochondrial carrier, brain), member 14 (Slc25a14), nuclear gene encoding mitochondrial protein, transcript variant 2, mRNA [NM_011398]	ENSMUSG00000031105	20523	-3.34678	11.3136	-18.1529	4.24296e-06	0.000123009	5.27461	DOWN
20515	A_51_P396978	Kcnip4	NM_030265	ref|Mus musculus Kv channel interacting protein 4 (Kcnip4), transcript variant 4, mRNA [NM_030265]	ENSMUSG00000029088	80334	-4.26931	8.57426	-18.1486	4.24846e-06	0.000123009	5.27334	DOWN
21135	A_51_P432937	Npas3	NM_013780	ref|Mus musculus neuronal PAS domain protein 3 (Npas3), mRNA [NM_013780]	ENSMUSG00000021010	27386	-3.07333	5.76737	-18.1426	4.25597e-06	0.000123054	5.2716	DOWN
4271	A_55_P2156140	Tcerg1l	ENSMUST00000161477	ens|transcription elongation regulator 1-like [Source:MGI Symbol;Acc:MGI:1917821] [ENSMUST00000161477]	ENSMUSG00000091002	70571	-3.58618	5.63841	-18.1202	4.28453e-06	0.000123706	5.26502	DOWN
31196	A_52_P496956	Acsbg1	NM_053178	ref|Mus musculus acyl-CoA synthetase bubblegum family member 1 (Acsbg1), mRNA [NM_053178]	ENSMUSG00000032281	94180	-3.35198	8.34437	-18.0914	4.32142e-06	0.000124538	5.25657	DOWN
11841	A_52_P315719	Gpr22	NM_175191	ref|Mus musculus G protein-coupled receptor 22 (Gpr22), mRNA [NM_175191]	ENSMUSG00000044067	73010	-3.52659	5.96064	-18.0842	4.33072e-06	0.000124538	5.25445	DOWN
14841	A_55_P1998545	Ncdn	NM_011986	ref|Mus musculus neurochondrin (Ncdn), mRNA [NM_011986]	ENSMUSG00000028833	26562	-4.15716	11.9813	-18.0813	4.33445e-06	0.000124538	5.25361	DOWN
17568	A_51_P415220	Zmat3	NM_009517	ref|Mus musculus zinc finger matrin type 3 (Zmat3), mRNA [NM_009517]	ENSMUSG00000027663	22401	-2.79422	10.4428	-18.0789	4.33748e-06	0.000124538	5.25292	DOWN
27857	A_55_P1989673	Slco2a1	NM_033314	ref|Mus musculus solute carrier organic anion transporter family, member 2a1 (Slco2a1), mRNA [NM_033314]	ENSMUSG00000032548	24059	4.21145	6.43684	18.0696	4.34952e-06	0.000124602	5.25019	UP
3293	A_51_P339055	Nipal2	NM_145469	ref|Mus musculus NIPA-like domain containing 2 (Nipal2), mRNA [NM_145469]	ENSMUSG00000038879	223473	-3.52124	6.4929	-18.0679	4.35176e-06	0.000124602	5.24968	DOWN
31155	A_52_P629895	Adh1	NM_007409	ref|Mus musculus alcohol dehydrogenase 1 (class I) (Adh1), mRNA [NM_007409]	ENSMUSG00000074207	11522	7.30951	9.13626	18.0538	4.3702e-06	0.000124818	5.24551	UP
4325	A_55_P2154132	Tuba1b	NM_011654	ref|Mus musculus tubulin, alpha 1B (Tuba1b), mRNA [NM_011654]	ENSMUSG00000023004	22143	-2.89856	15.7043	-18.0528	4.37142e-06	0.000124818	5.24524	DOWN
19627	A_52_P1516	Tmem191c	NM_177473	ref|Mus musculus transmembrane protein 191C (Tmem191c), mRNA [NM_177473]	ENSMUSG00000055692	224019	-3.55702	8.39014	-18.0437	4.38332e-06	0.000124873	5.24256	DOWN
11970	A_52_P221756	Spock2	NM_052994	ref|Mus musculus sparc/osteonectin, cwcv and kazal-like domains proteoglycan 2 (Spock2), mRNA [NM_052994]	ENSMUSG00000058297	94214	-3.39508	10.1628	-18.0377	4.39118e-06	0.000124873	5.24079	DOWN
3630	A_51_P104430	Magee1	NM_053201	ref|Mus musculus melanoma antigen, family E, 1 (Magee1), mRNA [NM_053201]	ENSMUSG00000031227	107528	-4.35968	8.25153	-18.0375	4.39149e-06	0.000124873	5.24072	DOWN
15599	A_55_P2341890	4921511C10Rik	AK137931	gb|Mus musculus 16 days neonate thymus cDNA, RIKEN full-length enriched library, clone:A130040N09 product:unclassifiable, full insert sequence. [AK137931]	ENSMUSG00000104585	70924	2.8774	6.53764	18.0233	4.41023e-06	0.000125233	5.23652	UP
4771	A_51_P290931	Ptprb	ENSMUST00000020363	ens|protein tyrosine phosphatase, receptor type, B [Source:MGI Symbol;Acc:MGI:97809] [ENSMUST00000020363]	ENSMUSG00000020154	19263	3.58246	7.40668	18.0116	4.42561e-06	0.000125364	5.23309	UP
14328	A_55_P2024625	Gm1987	NM_001193667	ref|Mus musculus predicted gene 1987 (Gm1987), mRNA [NM_001193667]	ENSMUSG00000095320	100504362	7.65913	9.10588	18.0106	4.42698e-06	0.000125364	5.23278	UP
34188	A_52_P646957	Grpr	NM_008177	ref|Mus musculus gastrin releasing peptide receptor (Grpr), mRNA [NM_008177]	ENSMUSG00000031364	14829	-3.43847	5.98971	-17.9888	4.45603e-06	0.000125922	5.22633	DOWN
9079	A_55_P2425938	2810468N07Rik	XR_105883	ref|PREDICTED: Mus musculus RIKEN cDNA 2810468N07 gene (2810468N07Rik), partial miscRNA [XR_105883]	ENSMUSG00000091475	72834	-5.24108	10.5155	-17.9856	4.46026e-06	0.000125922	5.22539	DOWN
16977	A_52_P14456	Srrm4	NM_026886	ref|Mus musculus serine/arginine repetitive matrix 4 (Srrm4), mRNA [NM_026886]	ENSMUSG00000063919	68955	-3.33837	8.01695	-17.9821	4.46497e-06	0.000125922	5.22435	DOWN
9923	A_55_P2034710	Clvs1	NM_028940	ref|Mus musculus clavesin 1 (Clvs1), mRNA [NM_028940]	ENSMUSG00000041216	74438	-2.96218	7.25027	-17.9763	4.47267e-06	0.000125941	5.22265	DOWN
14427	A_55_P1977431	Cck	NM_031161	ref|Mus musculus cholecystokinin (Cck), mRNA [NM_031161]	ENSMUSG00000032532	12424	-8.4945	11.2451	-17.9725	4.47785e-06	0.000125941	5.22151	DOWN
16620	A_55_P2185618	Gpr61	NM_175470	ref|Mus musculus G protein-coupled receptor 61 (Gpr61), mRNA [NM_175470]	ENSMUSG00000046793	229714	-3.59687	6.2862	-17.9529	4.50427e-06	0.000126385	5.2157	DOWN
16773	A_55_P2181602	Calb1	NM_009788	ref|Mus musculus calbindin 1 (Calb1), mRNA [NM_009788]	ENSMUSG00000028222	12307	-3.66887	6.08184	-17.9517	4.50587e-06	0.000126385	5.21535	DOWN
9676	A_55_P2149942	Ninj2	NM_016718	ref|Mus musculus ninjurin 2 (Ninj2), mRNA [NM_016718]	ENSMUSG00000041377	29862	-3.39706	6.02251	-17.9467	4.51259e-06	0.000126401	5.21388	DOWN
26433	A_55_P1995055	Prr7	NM_001030296	ref|Mus musculus proline rich 7 (synaptic) (Prr7), mRNA [NM_001030296]	ENSMUSG00000034686	432763	-4.36196	8.98568	-17.9291	4.53658e-06	0.000126887	5.20864	DOWN
28033	A_51_P324923	Man2a1	NM_008549	ref|Mus musculus mannosidase 2, alpha 1 (Man2a1), mRNA [NM_008549]	ENSMUSG00000024085	17158	2.90984	9.42438	17.9249	4.54223e-06	0.000126887	5.20741	UP
8793	A_51_P303061	Adcy8	NM_009623	ref|Mus musculus adenylate cyclase 8 (Adcy8), mRNA [NM_009623]	ENSMUSG00000022376	11514	-3.76893	6.39706	-17.9124	4.55937e-06	0.000126962	5.20369	DOWN
6299	A_51_P480233	Nmral1	NM_026393	ref|Mus musculus NmrA-like family domain containing 1 (Nmral1), mRNA [NM_026393]	ENSMUSG00000063445	67824	-3.24658	8.99365	-17.9102	4.56245e-06	0.000126962	5.20302	DOWN
6267	A_55_P2003915	ENSMUST00000103395	ENSMUST00000103395	ens|immunoglobulin kappa variable 6-13 [Source:MGI Symbol;Acc:MGI:1330829] [ENSMUST00000103395]	ENSMUST00000103395	NA	2.8355	3.84702	17.8995	4.57709e-06	0.000126962	5.19985	UP
16019	A_55_P2096071	Nanos2	NM_194064	ref|Mus musculus nanos homolog 2 (Drosophila) (Nanos2), mRNA [NM_194064]	ENSMUSG00000051965	378430	-3.72286	6.40242	-17.8992	4.57753e-06	0.000126962	5.19976	DOWN
26868	A_51_P517870	Nfatc1	NM_198429	ref|Mus musculus nuclear factor of activated T-cells, cytoplasmic, calcineurin-dependent 1 (Nfatc1), transcript variant 2, mRNA [NM_198429]	ENSMUSG00000033016	18018	3.30423	7.28986	17.8966	4.58122e-06	0.000126962	5.19896	UP
1065	A_52_P645862	Agtr1a	NM_177322	ref|Mus musculus angiotensin II receptor, type 1a (Agtr1a), mRNA [NM_177322]	ENSMUSG00000049115	11607	4.76522	6.10672	17.8961	4.58179e-06	0.000126962	5.19884	UP
34991	A_52_P338066	Ubd	NM_023137	ref|Mus musculus ubiquitin D (Ubd), mRNA [NM_023137]	ENSMUSG00000035186	24108	3.82736	5.38111	17.8829	4.60008e-06	0.000127246	5.1949	UP
5783	A_55_P2082653	Zfp711	NM_177747	ref|Mus musculus zinc finger protein 711 (Zfp711), mRNA [NM_177747]	ENSMUSG00000025529	245595	-4.43909	6.8245	-17.8761	4.60957e-06	0.000127246	5.19286	DOWN
2869	A_55_P2130238	Sh3gl2	ENSMUST00000107184	ens|SH3-domain GRB2-like 2 [Source:MGI Symbol;Acc:MGI:700009] [ENSMUST00000107184]	ENSMUSG00000028488	20404	-2.88469	6.28035	-17.8754	4.61054e-06	0.000127246	5.19266	DOWN
16730	A_55_P1995092	H2-Q10	NM_010391	ref|Mus musculus histocompatibility 2, Q region locus 10 (H2-Q10), mRNA [NM_010391]	ENSMUSG00000067235	15007	5.19857	7.95861	17.8679	4.621e-06	0.000127348	5.19041	UP
11730	A_55_P1980481	Grin2a	NM_008170	ref|Mus musculus glutamate receptor, ionotropic, NMDA2A (epsilon 1) (Grin2a), mRNA [NM_008170]	ENSMUSG00000059003	14811	-2.74833	5.93397	-17.8605	4.63133e-06	0.000127348	5.18821	DOWN
31014	A_55_P2274592	Wnt7b	NM_001163634	ref|Mus musculus wingless-related MMTV integration site 7B (Wnt7b), transcript variant 2, mRNA [NM_001163634]	ENSMUSG00000022382	22422	-2.98459	6.24044	-17.8595	4.63273e-06	0.000127348	5.18791	DOWN
6446	A_66_P136064	Tmem132d	AK082742	gb|Mus musculus 0 day neonate cerebellum cDNA, RIKEN full-length enriched library, clone:C230099M17 product:unclassifiable, full insert sequence. [AK082742]	ENSMUSG00000034310	243274	-3.96026	6.42511	-17.8429	4.65594e-06	0.000127815	5.18296	DOWN
10151	A_51_P388847	Stap2	NM_145934	ref|Mus musculus signal transducing adaptor family member 2 (Stap2), mRNA [NM_145934]	ENSMUSG00000038781	106766	4.34904	7.5944	17.8288	4.67586e-06	0.000128083	5.17874	UP
34017	A_52_P424784	Clstn2	NM_022319	ref|Mus musculus calsyntenin 2 (Clstn2), mRNA [NM_022319]	ENSMUSG00000032452	64085	-4.40176	9.88217	-17.8256	4.68035e-06	0.000128083	5.17779	DOWN
21903	A_51_P430973	Paqr7	NM_027995	ref|Mus musculus progestin and adipoQ receptor family member VII (Paqr7), mRNA [NM_027995]	ENSMUSG00000037348	71904	-3.06046	11.4862	-17.8228	4.68429e-06	0.000128083	5.17696	DOWN
5977	A_55_P2017600	Crmp1	NM_007765	ref|Mus musculus collapsin response mediator protein 1 (Crmp1), transcript variant 2, mRNA [NM_007765]	ENSMUSG00000029121	12933	-3.91615	9.53839	-17.8122	4.69938e-06	0.00012816	5.17377	DOWN
30531	A_52_P853177	Angptl2	NM_011923	ref|Mus musculus angiopoietin-like 2 (Angptl2), mRNA [NM_011923]	ENSMUSG00000004105	26360	3.32472	5.31915	17.8121	4.69952e-06	0.00012816	5.17374	UP
26857	A_51_P392291	Pdk3	NM_145630	ref|Mus musculus pyruvate dehydrogenase kinase, isoenzyme 3 (Pdk3), nuclear gene encoding mitochondrial protein, mRNA [NM_145630]	ENSMUSG00000035232	236900	-3.10179	8.67099	-17.8066	4.70742e-06	0.000128206	5.17208	DOWN
17590	A_52_P364140	Itga5	NM_010577	ref|Mus musculus integrin alpha 5 (fibronectin receptor alpha) (Itga5), mRNA [NM_010577]	ENSMUSG00000000555	16402	3.16769	5.27788	17.7883	4.73357e-06	0.000128663	5.1666	UP
12946	A_51_P421303	Caly	NM_026769	ref|Mus musculus calcyon neuron-specific vesicular protein (Caly), transcript variant A, mRNA [NM_026769]	ENSMUSG00000025468	68566	-5.8104	12.2071	-17.7836	4.74027e-06	0.000128663	5.16519	DOWN
27663	A_55_P1990179	Dlgap3	NM_198618	ref|Mus musculus discs, large (Drosophila) homolog-associated protein 3 (Dlgap3), mRNA [NM_198618]	ENSMUSG00000042388	242667	-5.25186	8.95038	-17.7818	4.7429e-06	0.000128663	5.16464	DOWN
8963	A_52_P365732	Cntn2	NM_177129	ref|Mus musculus contactin 2 (Cntn2), mRNA [NM_177129]	ENSMUSG00000053024	21367	-3.19196	5.52319	-17.7742	4.75378e-06	0.000128789	5.16237	DOWN
1925	A_55_P2043382	Llgl2	NM_145438	ref|Mus musculus lethal giant larvae homolog 2 (Drosophila) (Llgl2), mRNA [NM_145438]	ENSMUSG00000020782	217325	3.54581	6.18307	17.7509	4.78751e-06	0.000129533	5.15537	UP
14401	A_55_P1959648	Hspg2	NM_008305	ref|Mus musculus perlecan (heparan sulfate proteoglycan 2) (Hspg2), mRNA [NM_008305]	ENSMUSG00000028763	15530	4.17951	7.02942	17.7448	4.79643e-06	0.000129604	5.15352	UP
26805	A_55_P2430367	Zbtb8b	NM_153541	ref|Mus musculus zinc finger and BTB domain containing 8b (Zbtb8b), mRNA [NM_153541]	ENSMUSG00000048485	215627	-3.74004	6.21667	-17.7153	4.83959e-06	0.000130599	5.14464	DOWN
9531	A_55_P2066792	Sp110	NM_175397	ref|Mus musculus Sp110 nuclear body protein (Sp110), mRNA [NM_175397]	ENSMUSG00000070034	109032	2.90377	8.75691	17.6943	4.87062e-06	0.000131116	5.13831	UP
34258	A_55_P2055985	Cd209d	NM_130904	ref|Mus musculus CD209d antigen (Cd209d), mRNA [NM_130904]	ENSMUSG00000031495	170779	3.05248	7.46675	17.6898	4.87734e-06	0.000131116	5.13694	UP
33910	A_55_P1994942	Rorc	NM_011281	ref|Mus musculus RAR-related orphan receptor gamma (Rorc), mRNA [NM_011281]	ENSMUSG00000028150	19885	2.83215	6.88286	17.6885	4.87929e-06	0.000131116	5.13654	UP
12672	A_55_P2356263	Anks1b	AK036288	gb|Mus musculus 16 days neonate cerebellum cDNA, RIKEN full-length enriched library, clone:9630053P03 product:hypothetical protein, full insert sequence. [AK036288]	ENSMUSG00000058589	77531	-3.60313	6.04406	-17.6852	4.88413e-06	0.000131116	5.13556	DOWN
18814	A_55_P1978465	H2-Q8	NM_023124	ref|Mus musculus histocompatibility 2, Q region locus 8 (H2-Q8), mRNA [NM_023124]	ENSMUSG00000073409	15019	2.84139	9.71065	17.6794	4.89289e-06	0.00013118	5.13378	UP
4575	A_51_P401504	Col9a2	NM_007741	ref|Mus musculus collagen, type IX, alpha 2 (Col9a2), mRNA [NM_007741]	ENSMUSG00000028626	12840	-3.3352	8.17315	-17.664	4.91582e-06	0.000131624	5.12914	DOWN
7114	A_55_P2003911	ENSMUST00000103391	ENSMUST00000103391	ens|immunoglobulin kappa variable 6-17 [Source:MGI Symbol;Acc:MGI:1330833] [ENSMUST00000103391]	ENSMUST00000103391	NA	5.09898	5.48014	17.6264	4.97256e-06	0.000132805	5.11775	UP
28924	A_66_P113262	Galnt14	NM_027864	ref|Mus musculus UDP-N-acetyl-alpha-D-galactosamine:polypeptide N-acetylgalactosaminyltransferase 14 (Galnt14), mRNA [NM_027864]	ENSMUSG00000024064	71685	-3.05561	6.99516	-17.6263	4.9728e-06	0.000132805	5.1177	DOWN
25968	A_51_P285206	Cd3d	NM_013487	ref|Mus musculus CD3 antigen, delta polypeptide (Cd3d), mRNA [NM_013487]	ENSMUSG00000032094	12500	5.5801	5.93411	17.6154	4.98934e-06	0.00013301	5.1144	UP
22394	A_66_P122730	ENSMUST00000099182	ENSMUST00000099182	ens|RIKEN cDNA A830092H15 gene [Source:MGI Symbol;Acc:MGI:3698881] [ENSMUST00000099182]	ENSMUST00000099182	NA	-3.20552	5.60688	-17.6128	4.99336e-06	0.00013301	5.1136	DOWN
24630	A_51_P264084	Rab36	NM_029781	ref|Mus musculus RAB36, member RAS oncogene family (Rab36), mRNA [NM_029781]	ENSMUSG00000020175	76877	-3.17069	5.87896	-17.5941	5.02198e-06	0.0001336	5.10792	DOWN
1343	A_52_P177847	Tril	NM_025817	ref|Mus musculus TLR4 interactor with leucine-rich repeats (Tril), mRNA [NM_025817]	ENSMUSG00000043496	66873	-3.7109	7.38007	-17.5839	5.03774e-06	0.000133847	5.10481	DOWN
1180	A_55_P1985536	Shc3	NM_009167	ref|Mus musculus src homology 2 domain-containing transforming protein C3 (Shc3), mRNA [NM_009167]	ENSMUSG00000021448	20418	-2.88346	6.17916	-17.5767	5.04888e-06	0.000133855	5.10261	DOWN
13867	A_51_P416695	Lsamp	NM_175548	ref|Mus musculus limbic system-associated membrane protein (Lsamp), mRNA [NM_175548]	ENSMUSG00000061080	268890	-3.16477	7.01675	-17.5731	5.05442e-06	0.000133855	5.10152	DOWN
6380	A_55_P2177273	Kcna6	BC048782	gb|Mus musculus potassium voltage-gated channel, shaker-related, subfamily, member 6, mRNA (cDNA clone MGC:54601 IMAGE:6466414), complete cds. [BC048782]	ENSMUSG00000038077	16494	-2.84301	8.85356	-17.5709	5.05778e-06	0.000133855	5.10086	DOWN
21705	A_66_P113749	Il2rg	NM_013563	ref|Mus musculus interleukin 2 receptor, gamma chain (Il2rg), mRNA [NM_013563]	ENSMUSG00000031304	16186	4.6405	6.09007	17.5599	5.07489e-06	0.000133855	5.0975	UP
7281	A_52_P630429	ENSMUST00000103318	ENSMUST00000103318	ens|immunoglobulin kappa variable 2-116 [Source:MGI Symbol;Acc:MGI:3647785] [ENSMUST00000103318]	ENSMUST00000103318	NA	4.23118	4.68655	17.5578	5.07827e-06	0.000133855	5.09684	UP
29399	A_55_P2050944	Nmu	NM_019515	ref|Mus musculus neuromedin U (Nmu), mRNA [NM_019515]	ENSMUSG00000029236	56183	-4.39541	6.90458	-17.5568	5.07981e-06	0.000133855	5.09654	DOWN
17668	A_52_P70854	Tob2	NM_020507	ref|Mus musculus transducer of ERBB2, 2 (Tob2), mRNA [NM_020507]	ENSMUSG00000048546	57259	3.23624	10.6474	17.5545	5.08343e-06	0.000133855	5.09583	UP
20512	A_55_P2145139	ENSMUST00000098653	ENSMUST00000098653	ens|predicted gene 10654 [Source:MGI Symbol;Acc:MGI:3643366] [ENSMUST00000098653]	ENSMUST00000098653	NA	-3.47307	6.33505	-17.5385	5.10841e-06	0.000134341	5.09096	DOWN
30880	A_51_P211793	Rlbp1	NM_020599	ref|Mus musculus retinaldehyde binding protein 1 (Rlbp1), transcript variant 1, mRNA [NM_020599]	ENSMUSG00000039194	19771	-3.3928	6.11343	-17.5262	5.12767e-06	0.000134377	5.08721	DOWN
2838	A_55_P1954086	Postn	NM_001198766	ref|Mus musculus periostin, osteoblast specific factor (Postn), transcript variant 3, mRNA [NM_001198766]	ENSMUSG00000027750	50706	5.15274	5.94366	17.5259	5.12819e-06	0.000134377	5.08711	UP
21428	A_51_P379341	Neurod2	NM_010895	ref|Mus musculus neurogenic differentiation 2 (Neurod2), mRNA [NM_010895]	ENSMUSG00000038255	18013	-4.91851	6.86953	-17.5252	5.12928e-06	0.000134377	5.0869	DOWN
18838	A_55_P2177658	Mast1	NM_019945	ref|Mus musculus microtubule associated serine/threonine kinase 1 (Mast1), mRNA [NM_019945]	ENSMUSG00000053693	56527	-3.62585	8.94201	-17.5108	5.15205e-06	0.00013464	5.08249	DOWN
24961	A_51_P203955	Gbp2	NM_010260	ref|Mus musculus guanylate binding protein 2 (Gbp2), mRNA [NM_010260]	ENSMUSG00000028270	14469	3.16538	8.62129	17.5077	5.15701e-06	0.00013464	5.08153	UP
7795	A_52_P209484	Tmem88	NM_025915	ref|Mus musculus transmembrane protein 88 (Tmem88), mRNA [NM_025915]	ENSMUSG00000045377	67020	4.39974	8.3636	17.5065	5.15888e-06	0.00013464	5.08117	UP
17796	A_66_P106421	Ccdc30	NM_029286	ref|Mus musculus coiled-coil domain containing 30 (Ccdc30), mRNA [NM_029286]	ENSMUSG00000028637	73332	-2.8244	6.16904	-17.499	5.17086e-06	0.000134782	5.07887	DOWN
33061	A_51_P423709	Fam84a	NM_029007	ref|Mus musculus family with sequence similarity 84, member A (Fam84a), mRNA [NM_029007]	ENSMUSG00000020607	105005	-4.12287	7.33245	-17.4864	5.19099e-06	0.0001351	5.075	DOWN
13446	A_52_P64687	Camk2n1	NM_025451	ref|Mus musculus calcium/calmodulin-dependent protein kinase II inhibitor 1 (Camk2n1), mRNA [NM_025451]	ENSMUSG00000046447	66259	-3.46818	11.2906	-17.4831	5.19617e-06	0.0001351	5.07401	DOWN
7488	A_51_P289107	Hrh3	NM_133849	ref|Mus musculus histamine receptor H3 (Hrh3), mRNA [NM_133849]	ENSMUSG00000039059	99296	-4.97594	9.25132	-17.4788	5.20303e-06	0.000135109	5.07269	DOWN
13030	A_55_P1999945	Dlgap2	NM_172910	ref|Mus musculus discs, large (Drosophila) homolog-associated protein 2 (Dlgap2), transcript variant 1, mRNA [NM_172910]	ENSMUSG00000047495	244310	-2.88451	4.99249	-17.4728	5.21275e-06	0.000135191	5.07083	DOWN
36215	A_51_P153557	Hspa12a	NM_175199	ref|Mus musculus heat shock protein 12A (Hspa12a), mRNA [NM_175199]	ENSMUSG00000025092	73442	-3.36353	7.07329	-17.4677	5.22102e-06	0.000135235	5.06925	DOWN
10076	A_51_P230347	Srsf12	NM_177774	ref|Mus musculus serine/arginine-rich splicing factor 12 (Srsf12), mRNA [NM_177774]	ENSMUSG00000054679	272009	-2.87031	6.43271	-17.4583	5.23618e-06	0.000135308	5.06637	DOWN
18189	A_55_P1953861	Vstm2l	NM_198627	ref|Mus musculus V-set and transmembrane domain containing 2-like (Vstm2l), mRNA [NM_198627]	ENSMUSG00000037843	277432	-5.01786	12.8081	-17.4578	5.23691e-06	0.000135308	5.06623	DOWN
31311	A_52_P765764	ENSMUST00000103305	ENSMUST00000103305	ens|immunoglobulin kappa variable 1-132 [Source:MGI Symbol;Acc:MGI:3648800] [ENSMUST00000103305]	ENSMUST00000103305	NA	3.24152	4.29757	17.4428	5.26125e-06	0.000135767	5.06161	UP
25945	A_51_P318510	Ptprn	NM_008985	ref|Mus musculus protein tyrosine phosphatase, receptor type, N (Ptprn), mRNA [NM_008985]	ENSMUSG00000026204	19275	-4.80813	8.92798	-17.4218	5.29555e-06	0.000136481	5.05513	DOWN
11022	A_55_P1974687	March11	NM_177597	ref|Mus musculus membrane-associated ring finger (C3HC4) 11 (March11), mRNA [NM_177597]	ENSMUSG00000022269	211147	-2.83662	6.72316	-17.4136	5.30896e-06	0.000136487	5.05261	DOWN
2058	A_55_P1974367	Fabp3	NM_010174	ref|Mus musculus fatty acid binding protein 3, muscle and heart (Fabp3), mRNA [NM_010174]	ENSMUSG00000028773	14077	3.71005	13.9219	17.4135	5.309e-06	0.000136487	5.0526	UP
3490	A_55_P2037662	Atp1a3	NM_144921	ref|Mus musculus ATPase, Na+/K+ transporting, alpha 3 polypeptide (Atp1a3), mRNA [NM_144921]	ENSMUSG00000040907	232975	-3.41734	10.1924	-17.4058	5.3217e-06	0.000136502	5.05022	DOWN
18942	A_55_P2000172	Ppp1r16b	NM_001159662	ref|Mus musculus protein phosphatase 1, regulatory (inhibitor) subunit 16B (Ppp1r16b), transcript variant 1, mRNA [NM_001159662]	ENSMUSG00000037754	228852	-3.59464	7.98379	-17.4	5.33127e-06	0.000136502	5.04843	DOWN
9249	A_55_P2089060	Slc7a14	ENSMUST00000108245	ens|solute carrier family 7 (cationic amino acid transporter, y+ system), member 14 [Source:MGI Symbol;Acc:MGI:3040688] [ENSMUST00000108245]	ENSMUSG00000069072	241919	-3.23443	7.51496	-17.3992	5.3327e-06	0.000136502	5.04816	DOWN
10116	A_55_P2063626	Matk	NM_010768	ref|Mus musculus megakaryocyte-associated tyrosine kinase (Matk), mRNA [NM_010768]	ENSMUSG00000004933	17179	-4.06813	11.7777	-17.3971	5.33602e-06	0.000136502	5.04754	DOWN
32912	A_55_P1985544	Kcnk10	NM_029911	ref|Mus musculus potassium channel, subfamily K, member 10 (Kcnk10), mRNA [NM_029911]	ENSMUSG00000033854	72258	-3.46593	7.91288	-17.3906	5.3469e-06	0.000136611	5.04551	DOWN
29733	A_55_P2164629	Ptn	NM_008973	ref|Mus musculus pleiotrophin (Ptn), mRNA [NM_008973]	ENSMUSG00000029838	19242	-4.56836	9.8259	-17.3759	5.3713e-06	0.000137064	5.04097	DOWN
9204	A_55_P2009449	Pnma2	NM_175498	ref|Mus musculus paraneoplastic antigen MA2 (Pnma2), mRNA [NM_175498]	ENSMUSG00000046204	239157	-3.04208	10.1283	-17.3699	5.3812e-06	0.000137148	5.03913	DOWN
19235	A_51_P267370	Itm2c	NM_022417	ref|Mus musculus integral membrane protein 2C (Itm2c), mRNA [NM_022417]	ENSMUSG00000026223	64294	-3.20832	12.7606	-17.3552	5.4058e-06	0.000137605	5.03458	DOWN
26038	A_55_P1958165	Ms4a7	NM_001025610	ref|Mus musculus membrane-spanning 4-domains, subfamily A, member 7 (Ms4a7), transcript variant 2, mRNA [NM_001025610]	ENSMUSG00000024672	109225	4.50165	6.13534	17.3511	5.41277e-06	0.000137612	5.0333	UP
26782	A_52_P156452	Cmah	NM_007717	ref|Mus musculus cytidine monophospho-N-acetylneuraminic acid hydroxylase (Cmah), transcript variant 1, mRNA [NM_007717]	ENSMUSG00000016756	12763	3.557	5.11812	17.3462	5.42104e-06	0.000137653	5.03177	UP
9643	A_52_P409731	Scamp5	NM_020270	ref|Mus musculus secretory carrier membrane protein 5 (Scamp5), mRNA [NM_020270]	ENSMUSG00000040722	56807	-4.52055	9.89056	-17.3378	5.43513e-06	0.000137841	5.02918	DOWN
9855	A_55_P2132533	ENSMUST00000103324	ENSMUST00000103324	ens|immunoglobulin kappa chain variable 15-103 [Source:MGI Symbol;Acc:MGI:96513] [ENSMUST00000103324]	ENSMUST00000103324	NA	3.44004	5.26475	17.3248	5.4572e-06	0.000138084	5.02514	UP
3325	A_51_P214197	Stk17b	NM_133810	ref|Mus musculus serine/threonine kinase 17b (apoptosis-inducing) (Stk17b), mRNA [NM_133810]	ENSMUSG00000026094	98267	2.87891	7.66671	17.3229	5.46042e-06	0.000138084	5.02455	UP
3182	A_51_P279232	Dennd2d	NM_028110	ref|Mus musculus DENN/MADD domain containing 2D (Dennd2d), transcript variant 1, mRNA [NM_028110]	ENSMUSG00000027901	72121	3.18984	6.23009	17.3201	5.46509e-06	0.000138084	5.02369	UP
10406	A_55_P2060343	Zfp352	NM_153102	ref|Mus musculus zinc finger protein 352 (Zfp352), mRNA [NM_153102]	ENSMUSG00000070902	236537	-3.02406	12.062	-17.3133	5.47662e-06	0.000138084	5.02159	DOWN
23912	A_55_P1989514	2010016I18Rik	NR_033207	ref|Mus musculus RIKEN cDNA 2010016I18 gene (2010016I18Rik), non-coding RNA [NR_033207]	ENSMUSG00000091575	69206	4.04325	5.00634	17.3125	5.47814e-06	0.000138084	5.02131	UP
3851	A_55_P2029151	Snap47	NM_144521	ref|Mus musculus synaptosomal-associated protein, 47 (Snap47), mRNA [NM_144521]	ENSMUSG00000009894	67826	-3.4248	11.8403	-17.2831	5.52842e-06	0.000139045	5.01219	DOWN
888	A_55_P2143851	Gm996	NM_001005424	ref|Mus musculus predicted gene 996 (Gm996), mRNA [NM_001005424]	ENSMUSG00000029419	381353	-3.43991	7.31743	-17.2747	5.54289e-06	0.000139045	5.00958	DOWN
28748	A_55_P1980080	Rbms2	NM_001039080	ref|Mus musculus RNA binding motif, single stranded interacting protein 2 (Rbms2), transcript variant 2, mRNA [NM_001039080]	ENSMUSG00000040043	56516	3.06302	9.72637	17.2708	5.54974e-06	0.000139045	5.00834	UP
25548	A_55_P2014555	Lrp8	NM_001080926	ref|Mus musculus low density lipoprotein receptor-related protein 8, apolipoprotein e receptor (Lrp8), transcript variant 2, mRNA [NM_001080926]	ENSMUSG00000028613	16975	-2.93691	5.83336	-17.2695	5.55186e-06	0.000139045	5.00796	DOWN
27339	A_51_P215374	Slc6a17	NM_172271	ref|Mus musculus solute carrier family 6 (neurotransmitter transporter), member 17 (Slc6a17), mRNA [NM_172271]	ENSMUSG00000027894	229706	-5.19101	8.22817	-17.2694	5.55204e-06	0.000139045	5.00793	DOWN
16515	A_55_P2038056	Cttnbp2	NM_080285	ref|Mus musculus cortactin binding protein 2 (Cttnbp2), mRNA [NM_080285]	ENSMUSG00000000416	30785	-3.44355	6.20568	-17.2668	5.55667e-06	0.000139045	5.0071	DOWN
36549	A_51_P147034	Ica1l	NM_027407	ref|Mus musculus islet cell autoantigen 1-like (Ica1l), mRNA [NM_027407]	ENSMUSG00000026018	70375	-3.04453	7.97971	-17.2583	5.57129e-06	0.000139176	5.00447	DOWN
12722	A_51_P147766	Cpne9	NM_170673	ref|Mus musculus copine family member IX (Cpne9), mRNA [NM_170673]	ENSMUSG00000030270	211232	-3.61256	8.92345	-17.2537	5.57931e-06	0.000139176	5.00303	DOWN
21515	A_55_P2006118	Rbp4	NM_001159487	ref|Mus musculus retinol binding protein 4, plasma (Rbp4), transcript variant 1, mRNA [NM_001159487]	ENSMUSG00000024990	19662	5.04278	11.6571	17.2521	5.58216e-06	0.000139176	5.00252	UP
31382	A_52_P515769	Pcdh12	NM_017378	ref|Mus musculus protocadherin 12 (Pcdh12), mRNA [NM_017378]	ENSMUSG00000024440	53601	5.21048	5.21213	17.2424	5.59904e-06	0.000139429	4.9995	UP
8774	A_55_P1979126	Tuba3a	NM_009446	ref|Mus musculus tubulin, alpha 3A (Tuba3a), mRNA [NM_009446]	ENSMUSG00000067702	22144	-7.0498	8.99054	-17.2385	5.60587e-06	0.000139431	4.99828	DOWN
5151	A_51_P169745	Tuba1a	NM_011653	ref|Mus musculus tubulin, alpha 1A (Tuba1a), mRNA [NM_011653]	ENSMUSG00000072235	22142	-3.57096	14.788	-17.2326	5.61625e-06	0.000139521	4.99643	DOWN
717	A_55_P2150422	Fgfr3	ENSMUST00000134610	ens|fibroblast growth factor receptor 3 [Source:MGI Symbol;Acc:MGI:95524] [ENSMUST00000134610]	ENSMUSG00000054252	14184	-2.83699	8.09903	-17.2279	5.62448e-06	0.000139557	4.99497	DOWN
27457	A_55_P2108943	Ccr6	NM_009835	ref|Mus musculus chemokine (C-C motif) receptor 6 (Ccr6), transcript variant 1, mRNA [NM_009835]	ENSMUSG00000040899	12458	4.86343	5.85506	17.2086	5.65848e-06	0.000140232	4.98894	UP
7067	A_51_P411345	Mogat2	NM_177448	ref|Mus musculus monoacylglycerol O-acyltransferase 2 (Mogat2), mRNA [NM_177448]	ENSMUSG00000052396	233549	2.98316	5.37761	17.1977	5.67793e-06	0.000140518	4.98551	UP
8333	A_51_P173114	Cdhr1	NM_130878	ref|Mus musculus cadherin-related family member 1 (Cdhr1), mRNA [NM_130878]	ENSMUSG00000021803	170677	-3.17418	6.13695	-17.1918	5.68835e-06	0.000140518	4.98367	DOWN
8672	A_52_P121502	Pllp	NM_026385	ref|Mus musculus plasma membrane proteolipid (Pllp), mRNA [NM_026385]	ENSMUSG00000031775	67801	-6.06282	9.83146	-17.1907	5.69041e-06	0.000140518	4.98331	DOWN
20838	A_55_P2053320	Zfr2	NM_001034895	ref|Mus musculus zinc finger RNA binding protein 2 (Zfr2), mRNA [NM_001034895]	ENSMUSG00000034949	103406	-3.34093	11.2126	-17.1818	5.70616e-06	0.000140738	4.98055	DOWN
26737	A_52_P160955	Sox11	NM_009234	ref|Mus musculus SRY-box containing gene 11 (Sox11), mRNA [NM_009234]	ENSMUSG00000063632	20666	-3.06334	5.59461	-17.1729	5.72212e-06	0.000140964	4.97775	DOWN
27452	A_51_P394585	Snx22	NM_001025612	ref|Mus musculus sorting nexin 22 (Snx22), mRNA [NM_001025612]	ENSMUSG00000039452	382083	-2.74512	7.70176	-17.167	5.73275e-06	0.000141057	4.97589	DOWN
7691	A_55_P2095271	Pkn3	NM_153805	ref|Mus musculus protein kinase N3 (Pkn3), mRNA [NM_153805]	ENSMUSG00000026785	263803	4.38163	7.21142	17.1439	5.77446e-06	0.000141914	4.96863	UP
1770	A_55_P2160825	Xdh	ENSMUST00000097283	ens|xanthine dehydrogenase [Source:MGI Symbol;Acc:MGI:98973] [ENSMUST00000097283]	ENSMUSG00000024066	22436	3.267	5.87804	17.1306	5.79867e-06	0.000142217	4.96444	UP
30930	A_51_P285669	Pigz	NM_172822	ref|Mus musculus phosphatidylinositol glycan anchor biosynthesis, class Z (Pigz), mRNA [NM_172822]	ENSMUSG00000045625	239827	-4.10746	10.4653	-17.1289	5.80173e-06	0.000142217	4.96392	DOWN
25829	A_51_P464738	Slc2a1	NM_011400	ref|Mus musculus solute carrier family 2 (facilitated glucose transporter), member 1 (Slc2a1), mRNA [NM_011400]	ENSMUSG00000028645	20525	-2.83506	11.9954	-17.1255	5.80789e-06	0.000142217	4.96285	DOWN
16305	A_55_P2077153	Slc27a2	NM_011978	ref|Mus musculus solute carrier family 27 (fatty acid transporter), member 2 (Slc27a2), mRNA [NM_011978]	ENSMUSG00000027359	26458	2.97688	10.8056	17.122	5.81434e-06	0.000142217	4.96174	UP
7919	A_55_P1972084	Napb	NM_019632	ref|Mus musculus N-ethylmaleimide sensitive fusion protein attachment protein beta (Napb), mRNA [NM_019632]	ENSMUSG00000027438	17957	-4.18147	12.1038	-17.0937	5.86637e-06	0.000143123	4.95281	DOWN
15206	A_55_P2074326	Neu4	NM_173772	ref|Mus musculus sialidase 4 (Neu4), mRNA [NM_173772]	ENSMUSG00000034000	241159	-3.06998	5.06234	-17.0919	5.86965e-06	0.000143123	4.95225	DOWN
25697	A_55_P1985189	ENSMUST00000155906	ENSMUST00000155906	ens|predicted gene 3345 [Source:MGI Symbol;Acc:MGI:3781523] [ENSMUST00000155906]	ENSMUST00000155906	NA	3.10744	5.08264	17.0881	5.87674e-06	0.000143123	4.95104	UP
29161	A_55_P2060667	Krt9	NM_201255	ref|Mus musculus keratin 9 (Krt9), mRNA [NM_201255]	ENSMUSG00000051617	107656	-2.95865	7.25937	-17.0868	5.87911e-06	0.000143123	4.95064	DOWN
22172	A_51_P417720	Itga11	NM_176922	ref|Mus musculus integrin alpha 11 (Itga11), mRNA [NM_176922]	ENSMUSG00000032243	319480	3.29547	8.05894	17.0824	5.88737e-06	0.000143155	4.94923	UP
22358	A_52_P40832	Rab11fip4	ENSMUST00000017783	ens|RAB11 family interacting protein 4 (class II) [Source:MGI Symbol;Acc:MGI:2442920] [ENSMUST00000017783]	ENSMUSG00000017639	268451	-3.78646	7.62125	-17.0758	5.89956e-06	0.000143283	4.94716	DOWN
11580	A_55_P1988108	Mrc1	NM_008625	ref|Mus musculus mannose receptor, C type 1 (Mrc1), mRNA [NM_008625]	ENSMUSG00000026712	17533	4.85563	6.6506	17.0708	5.90895e-06	0.000143292	4.94556	UP
13359	A_52_P1174	Gal3st4	NM_001033416	ref|Mus musculus galactose-3-O-sulfotransferase 4 (Gal3st4), mRNA [NM_001033416]	ENSMUSG00000075593	330217	-3.61754	5.50455	-17.0668	5.91641e-06	0.000143292	4.9443	DOWN
19949	A_55_P1965772	Atp2a3	NM_001163337	ref|Mus musculus ATPase, Ca++ transporting, ubiquitous (Atp2a3), transcript variant 3, mRNA [NM_001163337]	ENSMUSG00000020788	53313	3.00981	7.00104	17.063	5.92347e-06	0.000143292	4.9431	UP
4914	A_55_P2471752	Pcdhac2	NM_001003672	ref|Mus musculus protocadherin alpha subfamily C, 2 (Pcdhac2), mRNA [NM_001003672]	ENSMUSG00000102697	353237	-3.18321	7.66594	-17.0607	5.92772e-06	0.000143292	4.94238	DOWN
33899	A_52_P220440	Slc6a15	NM_175328	ref|Mus musculus solute carrier family 6 (neurotransmitter transporter), member 15 (Slc6a15), mRNA [NM_175328]	ENSMUSG00000019894	103098	-4.29649	7.82369	-17.047	5.95344e-06	0.000143746	4.93804	DOWN
4504	A_51_P196925	Cx3cl1	NM_009142	ref|Mus musculus chemokine (C-X3-C motif) ligand 1 (Cx3cl1), mRNA [NM_009142]	ENSMUSG00000031778	20312	-5.13922	11.6916	-17.0418	5.96321e-06	0.000143774	4.93639	DOWN
8726	A_55_P1960238	Slc2a6	NM_172659	ref|Mus musculus solute carrier family 2 (facilitated glucose transporter), member 6 (Slc2a6), transcript variant 1, mRNA [NM_172659]	ENSMUSG00000036067	227659	-2.86263	8.36906	-17.039	5.96852e-06	0.000143774	4.9355	DOWN
16383	A_55_P1999962	Podn	NM_172874	ref|Mus musculus podocan (Podn), mRNA [NM_172874]	ENSMUSG00000028600	242608	4.63559	7.78028	17.0337	5.97857e-06	0.000143848	4.93381	UP
3324	A_51_P455647	Car2	NM_009801	ref|Mus musculus carbonic anhydrase 2 (Car2), mRNA [NM_009801]	ENSMUSG00000027562	12349	-4.65495	12.3008	-17.0295	5.98644e-06	0.00014387	4.93249	DOWN
6619	A_55_P2031466	Lrrc32	NM_001113379	ref|Mus musculus leucine rich repeat containing 32 (Lrrc32), mRNA [NM_001113379]	ENSMUSG00000090958	434215	3.34275	7.75173	17.0032	6.03645e-06	0.000144903	4.92415	UP
17767	A_51_P389664	Scrt2	NM_001160410	ref|Mus musculus scratch homolog 2, zinc finger protein (Drosophila) (Scrt2), mRNA [NM_001160410]	ENSMUSG00000060257	545474	-4.27093	8.71542	-16.9849	6.07159e-06	0.000145485	4.91832	DOWN
8743	A_55_P2018636	9530077C05Rik	NM_026739	ref|Mus musculus RIKEN cDNA 9530077C05 gene (9530077C05Rik), mRNA [NM_026739]	ENSMUSG00000036411	68283	-2.998	7.44561	-16.9832	6.07479e-06	0.000145485	4.91779	DOWN
2099	A_55_P2165790	Siglech	NM_178706	ref|Mus musculus sialic acid binding Ig-like lectin H (Siglech), mRNA [NM_178706]	ENSMUSG00000051504	233274	-2.80487	11.1547	-16.9701	6.10017e-06	0.000145923	4.9136	DOWN
6642	A_51_P396883	Gabrg1	NM_010252	ref|Mus musculus gamma-aminobutyric acid (GABA) A receptor, subunit gamma 1 (Gabrg1), mRNA [NM_010252]	ENSMUSG00000001260	14405	-6.51594	7.64194	-16.9644	6.1111e-06	0.000145929	4.9118	DOWN
8400	A_55_P2020577	Pcolce	NM_008788	ref|Mus musculus procollagen C-endopeptidase enhancer protein (Pcolce), mRNA [NM_008788]	ENSMUSG00000029718	18542	4.61506	10.0172	16.9626	6.11454e-06	0.000145929	4.91124	UP
38133	A_52_P190855	Ankrd34c	NM_207260	ref|Mus musculus ankyrin repeat domain 34C (Ankrd34c), mRNA [NM_207260]	ENSMUSG00000047606	330998	-3.72675	5.45614	-16.9501	6.13896e-06	0.000146343	4.90723	DOWN
7467	A_55_P2089233	Pou2af1	NM_011136	ref|Mus musculus POU domain, class 2, associating factor 1 (Pou2af1), mRNA [NM_011136]	ENSMUSG00000032053	18985	5.63469	6.03804	16.9429	6.15305e-06	0.000146376	4.90493	UP
34900	A_52_P683580	Tbc1d9	NM_027758	ref|Mus musculus TBC1 domain family, member 9 (Tbc1d9), transcript variant 2, mRNA [NM_027758]	ENSMUSG00000031709	71310	-3.20391	8.18032	-16.9421	6.15454e-06	0.000146376	4.90469	DOWN
5846	A_55_P1978511	H2-Q7	NM_010394	ref|Mus musculus histocompatibility 2, Q region locus 7 (H2-Q7), transcript variant 1, mRNA [NM_010394]	ENSMUSG00000060550	15018	2.84616	12.1651	16.9346	6.1693e-06	0.000146558	4.90228	UP
38934	A_55_P1959430	Chat	NM_009891	ref|Mus musculus choline acetyltransferase (Chat), mRNA [NM_009891]	ENSMUSG00000021919	12647	-4.37507	8.69236	-16.9146	6.20852e-06	0.00014732	4.89591	DOWN
37457	A_55_P2057726	ENSMUST00000066583	ENSMUST00000066583	ens|predicted gene 9925 [Source:MGI Symbol;Acc:MGI:3641738] [ENSMUST00000066583]	ENSMUST00000066583	NA	-4.70328	8.31272	-16.8933	6.25083e-06	0.000147401	4.88908	DOWN
6197	A_55_P2056871	Akap13	NM_029332	ref|Mus musculus A kinase (PRKA) anchor protein 13 (Akap13), mRNA [NM_029332]	ENSMUSG00000066406	75547	2.87232	8.77633	16.893	6.25152e-06	0.000147401	4.88897	UP
14094	A_55_P2114873	Tceal3	ENSMUST00000153780	ens|transcription elongation factor A (SII)-like 3 [Source:MGI Symbol;Acc:MGI:1913354] [ENSMUST00000153780]	ENSMUSG00000044550	594844	-3.1927	8.07002	-16.8869	6.26357e-06	0.000147401	4.88703	DOWN
18520	A_55_P1960894	Cabp1	NM_013879	ref|Mus musculus calcium binding protein 1 (Cabp1), mRNA [NM_013879]	ENSMUSG00000029544	29867	-3.10935	7.73407	-16.8864	6.26456e-06	0.000147401	4.88687	DOWN
19706	A_51_P518488	Atpif1	NM_007512	ref|Mus musculus ATPase inhibitory factor 1 (Atpif1), nuclear gene encoding mitochondrial protein, mRNA [NM_007512]	ENSMUSG00000054428	11983	-2.86884	15.4178	-16.8861	6.26527e-06	0.000147401	4.88676	DOWN
6091	A_51_P420547	Clic5	NM_172621	ref|Mus musculus chloride intracellular channel 5 (Clic5), nuclear gene encoding mitochondrial protein, mRNA [NM_172621]	ENSMUSG00000023959	224796	3.35945	10.1118	16.8807	6.276e-06	0.000147401	4.88504	UP
7819	A_51_P424471	Cnih3	NM_028408	ref|Mus musculus cornichon homolog 3 (Drosophila) (Cnih3), transcript variant 1, mRNA [NM_028408]	ENSMUSG00000026514	72978	-3.07191	5.35945	-16.878	6.28149e-06	0.000147401	4.88416	DOWN
27187	A_51_P243646	Gm4922	NM_177706	ref|Mus musculus predicted gene 4922 (Gm4922), mRNA [NM_177706]	ENSMUSG00000044624	237300	-3.09092	5.02354	-16.8778	6.28189e-06	0.000147401	4.8841	DOWN
19989	A_52_P185907	Crabp1	NM_013496	ref|Mus musculus cellular retinoic acid binding protein I (Crabp1), mRNA [NM_013496]	ENSMUSG00000032291	12903	-4.40888	7.49814	-16.8745	6.28845e-06	0.000147401	4.88304	DOWN
18951	A_51_P175667	Lpo	NM_080420	ref|Mus musculus lactoperoxidase (Lpo), mRNA [NM_080420]	ENSMUSG00000009356	76113	-3.13736	7.53158	-16.8736	6.29025e-06	0.000147401	4.88276	DOWN
14519	A_51_P287069	Serpinh1	NM_009825	ref|Mus musculus serine (or cysteine) peptidase inhibitor, clade H, member 1 (Serpinh1), transcript variant 1, mRNA [NM_009825]	ENSMUSG00000070436	12406	2.87831	9.84003	16.8735	6.29048e-06	0.000147401	4.88272	UP
12956	A_51_P350817	Cnn1	NM_009922	ref|Mus musculus calponin 1 (Cnn1), mRNA [NM_009922]	ENSMUSG00000001349	12797	6.15136	7.99139	16.8654	6.30661e-06	0.000147612	4.88014	UP
31404	A_55_P1998140	ENSMUST00000070359	ENSMUST00000070359	ens|predicted gene 9996 [Source:MGI Symbol;Acc:MGI:3642549] [ENSMUST00000070359]	ENSMUST00000070359	NA	-2.76566	5.561	-16.8584	6.32083e-06	0.000147777	4.87788	DOWN
25138	A_55_P2017590	Exog	NM_001172136	ref|Mus musculus endo/exonuclease (5'-3'), endonuclease G-like (Exog), transcript variant 1, mRNA [NM_001172136]	ENSMUSG00000042787	208194	-3.29927	8.84639	-16.8488	6.34022e-06	0.000147979	4.8748	DOWN
6098	A_55_P2045642	Stmn4	NM_019675	ref|Mus musculus stathmin-like 4 (Stmn4), mRNA [NM_019675]	ENSMUSG00000022044	56471	-6.4678	13.2976	-16.847	6.34381e-06	0.000147979	4.87422	DOWN
38830	A_55_P2013645	Tubg2	NM_134028	ref|Mus musculus tubulin, gamma 2 (Tubg2), mRNA [NM_134028]	ENSMUSG00000045007	103768	-4.46018	11.1997	-16.8414	6.35523e-06	0.000148078	4.87241	DOWN
14969	A_55_P2048640	Spock1	NM_001166464	ref|Mus musculus sparc/osteonectin, cwcv and kazal-like domains proteoglycan 1 (Spock1), transcript variant 4, mRNA [NM_001166464]	ENSMUSG00000056222	20745	-3.17359	5.82858	-16.8324	6.37353e-06	0.000148337	4.86952	DOWN
10559	A_51_P496309	Rfx4	NM_001024918	ref|Mus musculus regulatory factor X, 4 (influences HLA class II expression) (Rfx4), transcript variant 1, mRNA [NM_001024918]	ENSMUSG00000020037	71137	-3.32835	6.16357	-16.8141	6.41095e-06	0.000148918	4.86363	DOWN
5849	A_51_P469951	Srgap3	NM_080448	ref|Mus musculus SLIT-ROBO Rho GTPase activating protein 3 (Srgap3), mRNA [NM_080448]	ENSMUSG00000030257	259302	-3.11741	7.35213	-16.8064	6.42671e-06	0.000148918	4.86115	DOWN
8477	A_52_P97699	D430019H16Rik	BC058677	gb|Mus musculus RIKEN cDNA D430019H16 gene, mRNA (cDNA clone IMAGE:6834465), partial cds. [BC058677]	ENSMUSG00000094910	268595	-3.79316	9.76948	-16.8064	6.42671e-06	0.000148918	4.86115	DOWN
4386	A_55_P2105978	Stxbp5l	NM_172440	ref|Mus musculus syntaxin binding protein 5-like (Stxbp5l), transcript variant xb, mRNA [NM_172440]	ENSMUSG00000022829	207227	-2.75219	6.03574	-16.8051	6.42936e-06	0.000148918	4.86074	DOWN
16427	A_51_P328652	Acot7	NM_133348	ref|Mus musculus acyl-CoA thioesterase 7 (Acot7), transcript variant 2, mRNA [NM_133348]	ENSMUSG00000028937	70025	-3.21762	14.4068	-16.8026	6.43453e-06	0.000148918	4.85993	DOWN
3460	A_55_P2079732	Myo1h	NM_001164573	ref|Mus musculus myosin 1H (Myo1h), mRNA [NM_001164573]	ENSMUSG00000066952	231646	-5.31508	9.26455	-16.7961	6.44794e-06	0.000149061	4.85783	DOWN
22397	A_52_P591166	Dpysl2	NM_009955	ref|Mus musculus dihydropyrimidinase-like 2 (Dpysl2), mRNA [NM_009955]	ENSMUSG00000022048	12934	-2.76676	12.8926	-16.7893	6.46199e-06	0.000149163	4.85564	DOWN
35946	A_55_P2041828	Tubb3	NM_023279	ref|Mus musculus tubulin, beta 3 (Tubb3), mRNA [NM_023279]	ENSMUSG00000062380	22152	-4.22833	12.1923	-16.7841	6.47279e-06	0.000149163	4.85396	DOWN
4484	A_55_P2168722	Fmo5	NM_001161765	ref|Mus musculus flavin containing monooxygenase 5 (Fmo5), transcript variant 1, mRNA [NM_001161765]	ENSMUSG00000028088	14263	2.75782	7.45971	16.7789	6.48356e-06	0.000149163	4.85228	UP
6354	A_55_P1976584	Tmod2	NM_001038710	ref|Mus musculus tropomodulin 2 (Tmod2), transcript variant 1, mRNA [NM_001038710]	ENSMUSG00000032186	50876	-4.07434	9.47317	-16.7732	6.49558e-06	0.000149163	4.85041	DOWN
16587	A_52_P26626	Fam92b	NM_001033980	ref|Mus musculus family with sequence similarity 92, member B (Fam92b), mRNA [NM_001033980]	ENSMUSG00000042269	436062	-3.58883	7.16082	-16.7711	6.49993e-06	0.000149163	4.84974	DOWN
30554	A_55_P2184796	Pcdhb18	NM_053143	ref|Mus musculus protocadherin beta 18 (Pcdhb18), mRNA [NM_053143]	ENSMUSG00000048347	93889	-2.73782	7.00513	-16.7698	6.50267e-06	0.000149163	4.84932	DOWN
27214	A_51_P101137	Samd14	NM_146025	ref|Mus musculus sterile alpha motif domain containing 14 (Samd14), transcript variant 1, mRNA [NM_146025]	ENSMUSG00000047181	217125	-3.9004	10.6781	-16.7696	6.50293e-06	0.000149163	4.84927	DOWN
23022	A_55_P2092204	Lgals12	NM_019516	ref|Mus musculus lectin, galactose binding, soluble 12 (Lgals12), mRNA [NM_019516]	ENSMUSG00000024972	56072	4.46189	5.14241	16.7573	6.52877e-06	0.000149589	4.84528	UP
17200	A_52_P587738	P2ry2	NM_008773	ref|Mus musculus purinergic receptor P2Y, G-protein coupled 2 (P2ry2), mRNA [NM_008773]	ENSMUSG00000032860	18442	5.36629	7.15504	16.75	6.54403e-06	0.000149687	4.84292	UP
19257	A_52_P476754	Ubash3b	NM_176860	ref|Mus musculus ubiquitin associated and SH3 domain containing, B (Ubash3b), mRNA [NM_176860]	ENSMUSG00000032020	72828	-3.25257	9.48358	-16.7483	6.54753e-06	0.000149687	4.84238	DOWN
12900	A_51_P466288	Frmd5	NM_172673	ref|Mus musculus FERM domain containing 5 (Frmd5), mRNA [NM_172673]	ENSMUSG00000027238	228564	-4.50058	8.80955	-16.7302	6.58576e-06	0.000150394	4.83651	DOWN
22255	A_55_P2177885	Dact3	NM_001081655	ref|Mus musculus dapper homolog 3, antagonist of beta-catenin (xenopus) (Dact3), mRNA [NM_001081655]	ENSMUSG00000078794	629378	-4.16297	10.5048	-16.7197	6.60812e-06	0.000150601	4.8331	DOWN
12483	A_51_P343350	Amn	NM_033603	ref|Mus musculus amnionless (Amn), mRNA [NM_033603]	ENSMUSG00000021278	93835	-4.62254	7.02511	-16.7191	6.60942e-06	0.000150601	4.8329	DOWN
8287	A_52_P236448	Ngfr	NM_033217	ref|Mus musculus nerve growth factor receptor (TNFR superfamily, member 16) (Ngfr), mRNA [NM_033217]	ENSMUSG00000000120	18053	2.83746	8.79708	16.7058	6.63775e-06	0.00015108	4.82858	UP
900	A_55_P2150697	Cpne4	NM_028719	ref|Mus musculus copine IV (Cpne4), mRNA [NM_028719]	ENSMUSG00000032564	74020	-4.10402	6.39347	-16.7002	6.64979e-06	0.000151103	4.82676	DOWN
30688	A_51_P173678	Slc10a6	NM_029415	ref|Mus musculus solute carrier family 10 (sodium/bile acid cotransporter family), member 6 (Slc10a6), mRNA [NM_029415]	ENSMUSG00000029321	75750	4.36548	5.28538	16.6959	6.65899e-06	0.000151103	4.82536	UP
22729	A_52_P891775	Cdr2l	NM_001080929	ref|Mus musculus cerebellar degeneration-related protein 2-like (Cdr2l), mRNA [NM_001080929]	ENSMUSG00000050910	237988	-3.12248	11.4552	-16.6935	6.66397e-06	0.000151103	4.82461	DOWN
1606	A_51_P382849	Emb	NM_010330	ref|Mus musculus embigin (Emb), mRNA [NM_010330]	ENSMUSG00000021728	13723	-2.56366	9.97025	-16.6874	6.67713e-06	0.000151103	4.82261	DOWN
2600	A_51_P343613	Ehd2	NM_153068	ref|Mus musculus EH-domain containing 2 (Ehd2), mRNA [NM_153068]	ENSMUSG00000074364	259300	4.76054	7.51811	16.68	6.69307e-06	0.000151103	4.82021	UP
2419	A_52_P467488	Slc35d3	NM_029529	ref|Mus musculus solute carrier family 35, member D3 (Slc35d3), mRNA [NM_029529]	ENSMUSG00000050473	76157	-3.08046	7.66374	-16.6768	6.70007e-06	0.000151103	4.81915	DOWN
7447	A_51_P504494	Dll3	NM_007866	ref|Mus musculus delta-like 3 (Drosophila) (Dll3), mRNA [NM_007866]	ENSMUSG00000003436	13389	-3.52894	7.05109	-16.6744	6.70534e-06	0.000151103	4.81836	DOWN
8795	A_52_P233441	Gata2	NM_008090	ref|Mus musculus GATA binding protein 2 (Gata2), mRNA [NM_008090]	ENSMUSG00000015053	14461	3.03128	7.2473	16.673	6.70831e-06	0.000151103	4.81791	UP
35785	A_51_P161086	Ppic	NM_008908	ref|Mus musculus peptidylprolyl isomerase C (Ppic), mRNA [NM_008908]	ENSMUSG00000024538	19038	3.83412	8.01377	16.6711	6.71244e-06	0.000151103	4.81729	UP
23499	A_55_P1975510	H6pd	NM_173371	ref|Mus musculus hexose-6-phosphate dehydrogenase (glucose 1-dehydrogenase) (H6pd), mRNA [NM_173371]	ENSMUSG00000028980	100198	5.79946	9.66446	16.6703	6.71412e-06	0.000151103	4.81704	UP
17377	A_55_P1989296	Tnxb	NM_031176	ref|Mus musculus tenascin XB (Tnxb), mRNA [NM_031176]	ENSMUSG00000033327	81877	4.60122	8.80619	16.6609	6.73448e-06	0.000151103	4.81398	UP
30424	A_55_P1955517	Synj1	ENSMUST00000121759	ens|synaptojanin 1 [Source:MGI Symbol;Acc:MGI:1354961] [ENSMUST00000121759]	ENSMUSG00000022973	104015	-2.75198	9.0774	-16.6609	6.73455e-06	0.000151103	4.81397	DOWN
8302	A_55_P2029678	Etfa	NM_145615	ref|Mus musculus electron transferring flavoprotein, alpha polypeptide (Etfa), nuclear gene encoding mitochondrial protein, mRNA [NM_145615]	ENSMUSG00000032314	110842	3.74021	11.6006	16.6599	6.73676e-06	0.000151103	4.81364	UP
3985	A_52_P49457	Fbxl16	NM_001164225	ref|Mus musculus F-box and leucine-rich repeat protein 16 (Fbxl16), mRNA [NM_001164225]	ENSMUSG00000025738	214931	-4.04101	11.7413	-16.6578	6.74122e-06	0.000151103	4.81297	DOWN
11557	A_55_P2002657	Trim46	NM_183037	ref|Mus musculus tripartite motif-containing 46 (Trim46), transcript variant 2, mRNA [NM_183037]	ENSMUSG00000042766	360213	-3.96663	9.51085	-16.6446	6.77011e-06	0.000151532	4.80865	DOWN
23028	A_51_P356055	Grp	NM_175012	ref|Mus musculus gastrin releasing peptide (Grp), mRNA [NM_175012]	ENSMUSG00000024517	225642	-7.33313	7.85643	-16.6423	6.77503e-06	0.000151532	4.80792	DOWN
360	A_51_P112174	Ahi1	NM_026203	ref|Mus musculus Abelson helper integration site 1 (Ahi1), transcript variant 1, mRNA [NM_026203]	ENSMUSG00000019986	52906	-4.36355	8.31349	-16.6364	6.78812e-06	0.000151582	4.80597	DOWN
32762	A_55_P2140651	Creg2	NM_170597	ref|Mus musculus cellular repressor of E1A-stimulated genes 2 (Creg2), mRNA [NM_170597]	ENSMUSG00000050967	263764	-4.50108	8.53901	-16.6346	6.79196e-06	0.000151582	4.8054	DOWN
12204	A_52_P599317	Hs6st2	NM_001077202	ref|Mus musculus heparan sulfate 6-O-sulfotransferase 2 (Hs6st2), transcript variant 1, mRNA [NM_001077202]	ENSMUSG00000062184	50786	-5.32918	8.67756	-16.6283	6.80577e-06	0.000151726	4.80335	DOWN
1043	A_51_P483220	Impact	NM_008378	ref|Mus musculus imprinted and ancient (Impact), mRNA [NM_008378]	ENSMUSG00000024423	16210	-2.8856	9.61715	-16.6198	6.82457e-06	0.000151981	4.80056	DOWN
17209	A_52_P624415	Opalin	NM_153520	ref|Mus musculus oligodendrocytic myelin paranodal and inner loop protein (Opalin), mRNA [NM_153520]	ENSMUSG00000050121	226115	-6.38488	7.4308	-16.6126	6.84045e-06	0.00015217	4.79821	DOWN
5888	A_55_P2058165	Morn4	NM_198108	ref|Mus musculus MORN repeat containing 4 (Morn4), mRNA [NM_198108]	ENSMUSG00000049670	226123	-3.42833	10.413	-16.6065	6.85406e-06	0.000152309	4.7962	DOWN
30778	A_51_P499441	Prkd2	NM_178900	ref|Mus musculus protein kinase D2 (Prkd2), mRNA [NM_178900]	ENSMUSG00000041187	101540	3.29613	7.39434	16.5972	6.87476e-06	0.000152605	4.79316	UP
6633	A_52_P336904	Pclo	NM_011995	ref|Mus musculus piccolo (presynaptic cytomatrix protein) (Pclo), transcript variant 1, mRNA [NM_011995]	ENSMUSG00000061601	26875	-3.13552	7.82962	-16.5855	6.90095e-06	0.000153022	4.78931	DOWN
8345	A_55_P1986482	Galnt13	NM_173030	ref|Mus musculus UDP-N-acetyl-alpha-D-galactosamine:polypeptide N-acetylgalactosaminyltransferase 13 (Galnt13), mRNA [NM_173030]	ENSMUSG00000060988	271786	-3.3064	5.70072	-16.5761	6.92201e-06	0.000153324	4.78623	DOWN
3872	A_55_P2172956	Cnih2	NM_009920	ref|Mus musculus cornichon homolog 2 (Drosophila) (Cnih2), mRNA [NM_009920]	ENSMUSG00000024873	12794	-5.04725	11.285	-16.5604	6.95736e-06	0.000153942	4.78108	DOWN
16619	A_55_P2110915	Flrt1	NM_201411	ref|Mus musculus fibronectin leucine rich transmembrane protein 1 (Flrt1), mRNA [NM_201411]	ENSMUSG00000047787	396184	-2.75132	8.50426	-16.5536	6.97274e-06	0.000154072	4.77885	DOWN
11619	A_51_P472726	Pdlim2	NM_145978	ref|Mus musculus PDZ and LIM domain 2 (Pdlim2), mRNA [NM_145978]	ENSMUSG00000022090	213019	-3.58718	12.7828	-16.5512	6.97817e-06	0.000154072	4.77806	DOWN
2379	A_51_P518919	Cdh7	NM_172853	ref|Mus musculus cadherin 7, type 2 (Cdh7), mRNA [NM_172853]	ENSMUSG00000026312	241201	-2.63267	5.20365	-16.5467	6.98839e-06	0.000154133	4.77658	DOWN
20744	A_55_P1964648	Btla	NM_001037719	ref|Mus musculus B and T lymphocyte associated (Btla), transcript variant 1, mRNA [NM_001037719]	ENSMUSG00000052013	208154	4.7557	6.05228	16.5322	7.02138e-06	0.000154606	4.77182	UP
25632	A_66_P134808	Nos1ap	NM_027528	ref|Mus musculus nitric oxide synthase 1 (neuronal) adaptor protein (Nos1ap), transcript variant 2, mRNA [NM_027528]	ENSMUSG00000038473	70729	-3.1197	8.28426	-16.5293	7.02798e-06	0.000154606	4.77087	DOWN
7063	A_51_P227345	Dpep1	NM_007876	ref|Mus musculus dipeptidase 1 (renal) (Dpep1), mRNA [NM_007876]	ENSMUSG00000019278	13479	7.49415	6.80167	16.5223	7.0441e-06	0.000154606	4.76855	UP
10726	A_52_P125467	Reep2	NM_144865	ref|Mus musculus receptor accessory protein 2 (Reep2), transcript variant 1, mRNA [NM_144865]	ENSMUSG00000038555	225362	-4.80982	9.47212	-16.5221	7.04443e-06	0.000154606	4.7685	DOWN
5989	A_55_P1952091	Car10	ENSMUST00000092780	ens|carbonic anhydrase 10 [Source:MGI Symbol;Acc:MGI:1919855] [ENSMUST00000092780]	ENSMUSG00000056158	72605	-2.95422	5.75854	-16.5188	7.05206e-06	0.000154606	4.7674	DOWN
12285	A_55_P2060897	ENSMUST00000103410	ENSMUST00000103410	ens|immunoglobulin kappa constant [Source:MGI Symbol;Acc:MGI:96495] [ENSMUST00000103410]	ENSMUST00000103410	NA	8.00048	9.31312	16.5176	7.05478e-06	0.000154606	4.76701	UP
18704	A_51_P422685	Zmat4	NM_177086	ref|Mus musculus zinc finger, matrin type 4 (Zmat4), mRNA [NM_177086]	ENSMUSG00000037492	320158	-4.97438	9.43274	-16.4963	7.10386e-06	0.000155516	4.76	DOWN
4516	A_55_P2035018	Clec4n	NM_020001	ref|Mus musculus C-type lectin domain family 4, member n (Clec4n), transcript variant 1, mRNA [NM_020001]	ENSMUSG00000023349	56620	2.8165	5.65555	16.4845	7.13132e-06	0.000155952	4.75609	UP
24627	A_51_P414396	Mmrn2	NM_153127	ref|Mus musculus multimerin 2 (Mmrn2), mRNA [NM_153127]	ENSMUSG00000041445	105450	4.37674	9.42733	16.4599	7.1889e-06	0.000157045	4.74795	UP
16978	A_55_P1976007	Psme4	NM_134013	ref|Mus musculus proteasome (prosome, macropain) activator subunit 4 (Psme4), mRNA [NM_134013]	ENSMUSG00000040850	103554	2.92469	8.38606	16.4522	7.20681e-06	0.000157121	4.74542	UP
3917	A_55_P2017972	Slc7a5	NM_011404	ref|Mus musculus solute carrier family 7 (cationic amino acid transporter, y+ system), member 5 (Slc7a5), mRNA [NM_011404]	ENSMUSG00000040010	20539	-4.18276	8.32356	-16.4516	7.20838e-06	0.000157121	4.7452	DOWN
23838	A_55_P2127934	Palm3	NM_028877	ref|Mus musculus paralemmin 3 (Palm3), mRNA [NM_028877]	ENSMUSG00000047986	74337	-4.6826	7.48433	-16.4458	7.2219e-06	0.000157121	4.74331	DOWN
4177	A_51_P191669	Chgb	NM_007694	ref|Mus musculus chromogranin B (Chgb), mRNA [NM_007694]	ENSMUSG00000027350	12653	-5.71864	12.7026	-16.4454	7.22283e-06	0.000157121	4.74317	DOWN
3402	A_55_P1954486	Mapt	NM_001038609	ref|Mus musculus microtubule-associated protein tau (Mapt), transcript variant 1, mRNA [NM_001038609]	ENSMUSG00000018411	17762	-2.50277	13.46	-16.4273	7.26574e-06	0.000157888	4.73717	DOWN
18164	A_51_P330428	Eif4ebp1	NM_007918	ref|Mus musculus eukaryotic translation initiation factor 4E binding protein 1 (Eif4ebp1), mRNA [NM_007918]	ENSMUSG00000031490	13685	6.3588	10.9221	16.4202	7.28285e-06	0.000158094	4.73479	UP
29684	A_55_P2169356	ENSMUST00000098144	ENSMUST00000098144	ens|predicted gene 1966 [Source:MGI Symbol;Acc:MGI:3584360] [ENSMUST00000098144]	ENSMUST00000098144	NA	3.9851	6.62159	16.3988	7.33399e-06	0.00015898	4.72769	UP
26644	A_55_P2017501	Disp2	ENSMUST00000110843	ens|dispatched homolog 2 (Drosophila) [Source:MGI Symbol;Acc:MGI:2388733] [ENSMUST00000110843]	ENSMUSG00000040035	214240	-2.90069	6.58268	-16.3967	7.33909e-06	0.00015898	4.72699	DOWN
16933	A_55_P2112459	Cldn22	NM_029383	ref|Mus musculus claudin 22 (Cldn22), mRNA [NM_029383]	ENSMUSG00000038064	75677	5.79047	6.54897	16.3894	7.35655e-06	0.000159191	4.72458	UP
29530	A_51_P479645	Cdnf	NM_177647	ref|Mus musculus cerebral dopamine neurotrophic factor (Cdnf), mRNA [NM_177647]	ENSMUSG00000039496	227526	3.69848	6.94621	16.3765	7.38784e-06	0.000159701	4.72028	UP
10271	A_52_P541175	Marveld1	NM_183195	ref|Mus musculus MARVEL (membrane-associating) domain containing 1 (Marveld1), mRNA [NM_183195]	ENSMUSG00000044345	277010	3.14626	7.2489	16.3601	7.42769e-06	0.000160395	4.71482	UP
35390	A_65_P09285	2610524H06Rik	NM_181075	ref|Mus musculus RIKEN cDNA 2610524H06 gene (2610524H06Rik), mRNA [NM_181075]	ENSMUSG00000092486	330173	-2.52184	7.61574	-16.356	7.43782e-06	0.000160446	4.71343	DOWN
18972	A_55_P2072035	Thy1	NM_009382	ref|Mus musculus thymus cell antigen 1, theta (Thy1), mRNA [NM_009382]	ENSMUSG00000032011	21838	-4.34479	15.545	-16.349	7.45499e-06	0.000160648	4.71109	DOWN
32020	A_55_P1974957	Tnr	NM_022312	ref|Mus musculus tenascin R (Tnr), mRNA [NM_022312]	ENSMUSG00000015829	21960	-3.08223	6.46463	-16.341	7.47456e-06	0.000160902	4.70843	DOWN
5225	A_51_P483324	Ptpn22	NM_008979	ref|Mus musculus protein tyrosine phosphatase, non-receptor type 22 (lymphoid) (Ptpn22), mRNA [NM_008979]	ENSMUSG00000027843	19260	3.18155	5.70217	16.3367	7.48519e-06	0.000160963	4.70699	UP
530	A_55_P2159573	Reep6	NM_001204931	ref|Mus musculus receptor accessory protein 6 (Reep6), transcript variant 2, mRNA [NM_001204931]	ENSMUSG00000035504	70335	2.55195	8.25767	16.3234	7.51784e-06	0.000161068	4.70257	UP
25518	A_55_P2074406	Ldoc1	NM_001018087	ref|Mus musculus leucine zipper, down-regulated in cancer 1 (Ldoc1), mRNA [NM_001018087]	ENSMUSG00000057615	434784	-5.06722	7.51409	-16.3217	7.52205e-06	0.000161068	4.702	DOWN
6029	A_51_P304239	Loxl1	NM_010729	ref|Mus musculus lysyl oxidase-like 1 (Loxl1), mRNA [NM_010729]	ENSMUSG00000032334	16949	3.35739	6.96436	16.3193	7.52812e-06	0.000161068	4.70118	UP
15317	A_55_P2147736	Dpysl4	NM_011993	ref|Mus musculus dihydropyrimidinase-like 4 (Dpysl4), mRNA [NM_011993]	ENSMUSG00000025478	26757	-3.17722	9.79311	-16.316	7.53635e-06	0.000161068	4.70008	DOWN
2368	A_55_P2060707	Il15ra	NM_133836	ref|Mus musculus interleukin 15 receptor, alpha chain (Il15ra), transcript variant 2, mRNA [NM_133836]	ENSMUSG00000023206	16169	2.75293	8.74359	16.3149	7.53896e-06	0.000161068	4.69972	UP
27849	A_51_P245368	Abcb1b	NM_011075	ref|Mus musculus ATP-binding cassette, sub-family B (MDR/TAP), member 1B (Abcb1b), mRNA [NM_011075]	ENSMUSG00000028970	18669	3.07138	8.18043	16.3143	7.5406e-06	0.000161068	4.6995	UP
36572	A_55_P2103132	Pou3f2	NM_008899	ref|Mus musculus POU domain, class 3, transcription factor 2 (Pou3f2), mRNA [NM_008899]	ENSMUSG00000095139	18992	-2.85164	5.35325	-16.3126	7.54471e-06	0.000161068	4.69895	DOWN
189	A_55_P2171493	BC030867	NM_153544	ref|Mus musculus cDNA sequence BC030867 (BC030867), mRNA [NM_153544]	ENSMUSG00000034773	217216	-2.94959	7.67428	-16.3054	7.56259e-06	0.000161283	4.69655	DOWN
16225	A_55_P2135725	C8g	NM_027062	ref|Mus musculus complement component 8, gamma polypeptide (C8g), mRNA [NM_027062]	ENSMUSG00000015083	69379	3.07299	8.51887	16.2884	7.60509e-06	0.000161834	4.69085	UP
8307	A_55_P2017982	Pde8b	NM_001170669	ref|Mus musculus phosphodiesterase 8B (Pde8b), transcript variant 1, mRNA [NM_001170669]	ENSMUSG00000021684	218461	-2.57456	6.90169	-16.2872	7.60822e-06	0.000161834	4.69044	DOWN
13270	A_55_P2066578	Ifi204	BC010546	gb|Mus musculus interferon activated gene 204, mRNA (cDNA clone MGC:18551 IMAGE:4018506), complete cds. [BC010546]	ENSMUSG00000073489	15951	4.90716	7.19093	16.2857	7.61193e-06	0.000161834	4.68994	UP
37721	A_55_P2064257	Dnaic2	NM_001034878	ref|Mus musculus dynein, axonemal, intermediate chain 2 (Dnaic2), mRNA [NM_001034878]	ENSMUSG00000034706	432611	-3.68999	6.32648	-16.2474	7.70895e-06	0.000163728	4.67707	DOWN
22552	A_55_P2108476	Mavs	NM_144888	ref|Mus musculus mitochondrial antiviral signaling protein (Mavs), nuclear gene encoding mitochondrial protein, transcript variant 1, mRNA [NM_144888]	ENSMUSG00000037523	228607	2.85739	10.4575	16.2208	7.77703e-06	0.000165004	4.66813	UP
24865	A_52_P58181	Suclg2	NM_011507	ref|Mus musculus succinate-Coenzyme A ligase, GDP-forming, beta subunit (Suclg2), nuclear gene encoding mitochondrial protein, mRNA [NM_011507]	ENSMUSG00000061838	20917	2.65928	9.30086	16.1733	7.90049e-06	0.000167367	4.65211	UP
15581	A_52_P1042732	Akap5	NM_001101471	ref|Mus musculus A kinase (PRKA) anchor protein 5 (Akap5), mRNA [NM_001101471]	ENSMUSG00000021057	238276	-3.06481	7.77126	-16.1718	7.9046e-06	0.000167367	4.65158	DOWN
11175	A_55_P2039842	Frmpd1	NM_001081172	ref|Mus musculus FERM and PDZ domain containing 1 (Frmpd1), mRNA [NM_001081172]	ENSMUSG00000035615	666060	-4.15246	9.81634	-16.1641	7.92486e-06	0.000167606	4.64897	DOWN
9436	A_55_P2143251	Rims3	ENSMUST00000071093	ens|regulating synaptic membrane exocytosis 3 [Source:MGI Symbol;Acc:MGI:2443331] [ENSMUST00000071093]	ENSMUSG00000032890	242662	-4.20179	8.44601	-16.1602	7.93512e-06	0.000167606	4.64766	DOWN
13302	A_55_P2103952	ENSMUST00000163885	ENSMUST00000163885	ens|predicted gene 3248 [Source:MGI Symbol;Acc:MGI:3781426] [ENSMUST00000163885]	ENSMUST00000163885	NA	-2.86875	6.11952	-16.1582	7.94026e-06	0.000167606	4.64699	DOWN
35461	A_55_P2021231	Zfp248	NM_028335	ref|Mus musculus zinc finger protein 248 (Zfp248), mRNA [NM_028335]	ENSMUSG00000030145	72720	-2.63444	6.86126	-16.1512	7.95881e-06	0.000167777	4.64462	DOWN
4949	A_52_P30641	ENSMUST00000103337	ENSMUST00000103337	ens|immunoglobulin kappa variable 4-86 [Source:MGI Symbol;Acc:MGI:2685305] [ENSMUST00000103337]	ENSMUST00000103337	NA	2.51794	4.75741	16.149	7.96464e-06	0.000167777	4.64387	UP
2454	A_66_P101862	Chrna4	ENSMUST00000108851	ens|cholinergic receptor, nicotinic, alpha polypeptide 4 [Source:MGI Symbol;Acc:MGI:87888] [ENSMUST00000108851]	ENSMUSG00000027577	11438	-3.52255	7.57283	-16.1433	7.97993e-06	0.000167849	4.64192	DOWN
230	A_51_P244194	Cadm3	NM_053199	ref|Mus musculus cell adhesion molecule 3 (Cadm3), mRNA [NM_053199]	ENSMUSG00000005338	94332	-4.33982	10.0137	-16.1416	7.98429e-06	0.000167849	4.64137	DOWN
11189	A_55_P1958394	Slit2	NM_178804	ref|Mus musculus slit homolog 2 (Drosophila) (Slit2), mRNA [NM_178804]	ENSMUSG00000031558	20563	-2.95707	7.2959	-16.13	8.0153e-06	0.000168329	4.63742	DOWN
30519	A_52_P398989	Cytip	NM_139200	ref|Mus musculus cytohesin 1 interacting protein (Cytip), mRNA [NM_139200]	ENSMUSG00000026832	227929	4.69409	5.71402	16.1176	8.04843e-06	0.000168853	4.63322	UP
10426	A_51_P111164	Rnd1	NM_172612	ref|Mus musculus Rho family GTPase 1 (Rnd1), mRNA [NM_172612]	ENSMUSG00000054855	223881	-3.21216	9.11139	-16.1119	8.06375e-06	0.000168958	4.63128	DOWN
4125	A_55_P1976278	Prkcb	NM_008855	ref|Mus musculus protein kinase C, beta (Prkcb), mRNA [NM_008855]	ENSMUSG00000052889	18751	-3.13539	11.3301	-16.1097	8.06977e-06	0.000168958	4.63052	DOWN
9008	A_55_P2129614	Itprip	NM_001001738	ref|Mus musculus inositol 1,4,5-triphosphate receptor interacting protein (Itprip), mRNA [NM_001001738]	ENSMUSG00000044948	414801	2.86508	7.60082	16.0934	8.1136e-06	0.000169673	4.625	UP
6497	A_51_P460954	Ccl6	NM_009139	ref|Mus musculus chemokine (C-C motif) ligand 6 (Ccl6), mRNA [NM_009139]	ENSMUSG00000018927	20305	3.28442	9.11114	16.0811	8.14699e-06	0.000169673	4.62081	UP
11963	A_55_P2051849	Snap25	NM_011428	ref|Mus musculus synaptosomal-associated protein 25 (Snap25), mRNA [NM_011428]	ENSMUSG00000027273	20614	-3.45304	15.1196	-16.077	8.15838e-06	0.000169673	4.61939	DOWN
3429	A_55_P2047589	ENSMUST00000103328	ENSMUST00000103328	ens|predicted gene, 16637 [Source:MGI Symbol;Acc:MGI:4439561] [ENSMUST00000103328]	ENSMUST00000103328	NA	3.78817	4.71967	16.0722	8.17139e-06	0.000169673	4.61777	UP
13246	A_55_P1979873	Phactr3	NM_028806	ref|Mus musculus phosphatase and actin regulator 3 (Phactr3), transcript variant 1, mRNA [NM_028806]	ENSMUSG00000027525	74189	-4.61755	7.0262	-16.0712	8.17404e-06	0.000169673	4.61743	DOWN
9627	A_55_P2076631	Gypc	NM_001048207	ref|Mus musculus glycophorin C (Gypc), mRNA [NM_001048207]	ENSMUSG00000090523	71683	5.33903	8.51884	16.069	8.18e-06	0.000169673	4.61669	UP
6470	A_55_P1973373	Vstm2a	ENSMUST00000109647	ens|V-set and transmembrane domain containing 2A [Source:MGI Symbol;Acc:MGI:2384826] [ENSMUST00000109647]	ENSMUSG00000048834	211739	-3.61913	6.15972	-16.0688	8.18076e-06	0.000169673	4.6166	DOWN
1088	A_55_P2001269	ENSMUST00000103522	ENSMUST00000103522	ens|predicted gene, 16828 [Source:MGI Symbol;Acc:MGI:4439752] [ENSMUST00000103522]	ENSMUST00000103522	NA	4.7054	6.05102	16.0678	8.18342e-06	0.000169673	4.61627	UP
20348	A_55_P2036290	Gm10432	XM_003085574	ref|PREDICTED: Mus musculus predicted gene 10432 (Gm10432), mRNA [XM_003085574]	ENSMUSG00000113679	100038713	-2.47806	5.40253	-16.0665	8.18696e-06	0.000169673	4.61582	DOWN
10233	A_55_P2113498	Klrd1	NM_010654	ref|Mus musculus killer cell lectin-like receptor, subfamily D, member 1 (Klrd1), mRNA [NM_010654]	ENSMUSG00000030165	16643	3.06851	4.7011	16.065	8.19102e-06	0.000169673	4.61532	UP
24312	A_55_P2112892	Dab1	NM_010014	ref|Mus musculus disabled homolog 1 (Drosophila) (Dab1), transcript variant 1, mRNA [NM_010014]	ENSMUSG00000028519	13131	-3.89854	6.85693	-16.0638	8.19436e-06	0.000169673	4.6149	DOWN
18320	A_66_P108276	Gsg1l	NM_001101488	ref|Mus musculus GSG1-like (Gsg1l), mRNA [NM_001101488]	ENSMUSG00000046182	269994	-2.71414	6.02001	-16.0523	8.22602e-06	0.000170158	4.61097	DOWN
35717	A_52_P87964	Pla2g12a	NM_183423	ref|Mus musculus phospholipase A2, group XIIA (Pla2g12a), transcript variant 2, mRNA [NM_183423]	ENSMUSG00000027999	66350	2.66101	10.3449	16.0382	8.26495e-06	0.000170792	4.60616	UP
24788	A_55_P2168859	Dok6	NM_001039173	ref|Mus musculus docking protein 6 (Dok6), mRNA [NM_001039173]	ENSMUSG00000073514	623279	-2.99506	6.4144	-16.0237	8.30514e-06	0.000171451	4.60121	DOWN
12012	A_55_P2062777	Mfap5	NM_015776	ref|Mus musculus microfibrillar associated protein 5 (Mfap5), mRNA [NM_015776]	ENSMUSG00000030116	50530	5.44135	8.47233	16.004	8.36023e-06	0.000172416	4.59446	UP
3687	A_55_P2103501	Ankrd29	NM_001190371	ref|Mus musculus ankyrin repeat domain 29 (Ankrd29), mRNA [NM_001190371]	ENSMUSG00000057766	225187	-3.23965	8.848	-15.9924	8.3928e-06	0.000172753	4.59049	DOWN
19713	A_55_P2021413	Celf4	NM_001146292	ref|Mus musculus CUGBP, Elav-like family member 4 (Celf4), transcript variant 1, mRNA [NM_001146292]	ENSMUSG00000024268	108013	-2.93299	9.96567	-15.9915	8.39538e-06	0.000172753	4.59018	DOWN
34093	A_52_P609972	Eln	NM_007925	ref|Mus musculus elastin (Eln), mRNA [NM_007925]	ENSMUSG00000029675	13717	3.37681	6.03039	15.9893	8.40165e-06	0.000172753	4.58942	UP
27574	A_55_P1981664	Sept8	NM_033144	ref|Mus musculus septin 8 (Sept8), mRNA [NM_033144]	ENSMUSG00000018398	20362	-2.67639	10.7122	-15.9848	8.41433e-06	0.000172841	4.58788	DOWN
14023	A_52_P376135	Mknk2	NM_021462	ref|Mus musculus MAP kinase-interacting serine/threonine kinase 2 (Mknk2), mRNA [NM_021462]	ENSMUSG00000020190	17347	3.79721	9.32122	15.9782	8.43299e-06	0.00017304	4.58562	UP
34111	A_52_P599549	Rragb	NM_001004154	ref|Mus musculus Ras-related GTP binding B (Rragb), mRNA [NM_001004154]	ENSMUSG00000041658	245670	-3.75692	7.75376	-15.9739	8.44524e-06	0.00017304	4.58413	DOWN
33055	A_52_P538084	ENSMUST00000103303	ENSMUST00000103303	ens|immunoglobulin kappa variable 1-135 [Source:MGI Symbol;Acc:MGI:3819952] [ENSMUST00000103303]	ENSMUST00000103303	NA	2.97515	4.51158	15.9725	8.44915e-06	0.00017304	4.58366	UP
25521	A_65_P16059	Tgfbr3	NM_011578	ref|Mus musculus transforming growth factor, beta receptor III (Tgfbr3), mRNA [NM_011578]	ENSMUSG00000029287	21814	2.58187	9.50224	15.9641	8.47294e-06	0.000173298	4.58079	UP
3940	A_51_P389885	Spic	NM_011461	ref|Mus musculus Spi-C transcription factor (Spi-1/PU.1 related) (Spic), mRNA [NM_011461]	ENSMUSG00000004359	20728	2.83626	5.2393	15.9622	8.47854e-06	0.000173298	4.58012	UP
11038	A_66_P129976	Apba1	NM_177034	ref|Mus musculus amyloid beta (A4) precursor protein binding, family A, member 1 (Apba1), mRNA [NM_177034]	ENSMUSG00000024897	319924	-3.2558	10.8633	-15.9493	8.51536e-06	0.000173878	4.57569	DOWN
6653	A_52_P671700	Acad12	NM_178799	ref|Mus musculus acyl-Coenzyme A dehydrogenase family, member 12 (Acad12), mRNA [NM_178799]	ENSMUSG00000042647	338350	2.89761	7.62207	15.9385	8.54622e-06	0.000174336	4.57199	UP
11787	A_51_P501453	Ms4a8a	NM_022430	ref|Mus musculus membrane-spanning 4-domains, subfamily A, member 8A (Ms4a8a), mRNA [NM_022430]	ENSMUSG00000024730	64381	4.31576	4.61966	15.9259	8.58276e-06	0.00017481	4.56763	UP
5639	A_52_P1044964	Grin2b	NM_008171	ref|Mus musculus glutamate receptor, ionotropic, NMDA2B (epsilon 2) (Grin2b), mRNA [NM_008171]	ENSMUSG00000030209	14812	-3.1895	6.16985	-15.9246	8.58638e-06	0.00017481	4.5672	DOWN
12767	A_55_P1981494	H2-Bl	AY533667	gb|Mus musculus MHC class I antigen precursor (H2-Bl) mRNA, H2-Bl-a allele, partial cds. [AY533667]	ENSMUSG00000073406	14963	2.90995	8.99513	15.9205	8.59849e-06	0.000174884	4.56576	UP
1601	A_52_P644690	Flt3l	NM_013520	ref|Mus musculus FMS-like tyrosine kinase 3 ligand (Flt3l), mRNA [NM_013520]	ENSMUSG00000110206	14256	2.99627	7.0565	15.9127	8.62105e-06	0.00017517	4.56309	UP
18887	A_55_P2083889	Pea15a	NM_011063	ref|Mus musculus phosphoprotein enriched in astrocytes 15A (Pea15a), transcript variant 2, mRNA [NM_011063]	ENSMUSG00000013698	18611	-3.29309	12.2844	-15.9031	8.64915e-06	0.000175456	4.55976	DOWN
33888	A_55_P2087087	Pecam1	NM_001032378	ref|Mus musculus platelet/endothelial cell adhesion molecule 1 (Pecam1), transcript variant 2, mRNA [NM_001032378]	ENSMUSG00000020717	18613	2.80069	7.14388	15.9021	8.65209e-06	0.000175456	4.55941	UP
23919	A_55_P1999715	ENSMUST00000103291	ENSMUST00000103291	ens|T-cell receptor beta, constant region 1 [Source:MGI Symbol;Acc:MGI:4439726] [ENSMUST00000103291]	ENSMUST00000103291	NA	5.61683	7.41989	15.8963	8.66902e-06	0.000175625	4.55741	UP
26097	A_55_P1973563	5730559C18Rik	NM_028872	ref|Mus musculus RIKEN cDNA 5730559C18 gene (5730559C18Rik), mRNA [NM_028872]	ENSMUSG00000041605	67313	-4.78119	6.52588	-15.8928	8.67916e-06	0.000175625	4.55622	DOWN
28233	A_52_P412452	Cntn6	NM_017383	ref|Mus musculus contactin 6 (Cntn6), mRNA [NM_017383]	ENSMUSG00000030092	53870	-4.60115	7.37722	-15.8905	8.68595e-06	0.000175625	4.55542	DOWN
26851	A_55_P2068406	2410018L13Rik	NR_015504	ref|Mus musculus RIKEN cDNA 2410018L13 gene (2410018L13Rik), non-coding RNA [NR_015504]	ENSMUSG00000073164	69732	-2.69262	6.61883	-15.8792	8.71915e-06	0.000176123	4.55152	DOWN
28984	A_55_P2136678	ENSMUST00000072014	ENSMUST00000072014	ens|predicted gene 10330 [Source:MGI Symbol;Acc:MGI:3642221] [ENSMUST00000072014]	ENSMUST00000072014	NA	-2.50396	6.9965	-15.8664	8.75714e-06	0.000176718	4.54707	DOWN
11314	A_55_P2059046	Spire2	NM_172287	ref|Mus musculus spire homolog 2 (Drosophila) (Spire2), mRNA [NM_172287]	ENSMUSG00000010154	234857	-3.1609	5.71957	-15.8592	8.77836e-06	0.000176973	4.5446	DOWN
13459	A_55_P2096762	Arhgdig	NM_008113	ref|Mus musculus Rho GDP dissociation inhibitor (GDI) gamma (Arhgdig), mRNA [NM_008113]	ENSMUSG00000073433	14570	-3.81174	11.6836	-15.8553	8.79013e-06	0.000177037	4.54323	DOWN
10843	A_51_P395373	Ptprt	NM_021464	ref|Mus musculus protein tyrosine phosphatase, receptor type, T (Ptprt), mRNA [NM_021464]	ENSMUSG00000053141	19281	-3.55161	6.37676	-15.8311	8.86244e-06	0.00017832	4.53484	DOWN
6992	A_55_P2058718	Ephb4	NM_001159571	ref|Mus musculus Eph receptor B4 (Ephb4), transcript variant 1, mRNA [NM_001159571]	ENSMUSG00000029710	13846	3.02263	6.37546	15.8274	8.87348e-06	0.000178368	4.53357	UP
20218	A_51_P470715	Cish	NM_009895	ref|Mus musculus cytokine inducible SH2-containing protein (Cish), mRNA [NM_009895]	ENSMUSG00000032578	12700	3.37169	9.72169	15.8154	8.90966e-06	0.000178921	4.5294	UP
16235	A_55_P1961400	Grid2ip	NM_133355	ref|Mus musculus glutamate receptor, ionotropic, delta 2 (Grid2) interacting protein 1 (Grid2ip), transcript variant 2, mRNA [NM_133355]	ENSMUSG00000010825	170935	-3.01312	6.78888	-15.8092	8.92848e-06	0.000178952	4.52724	DOWN
11928	A_55_P2042973	1010001N08Rik	XR_105930	ref|PREDICTED: Mus musculus RIKEN cDNA 1010001N08 gene (1010001N08Rik), partial miscRNA [XR_105930]	ENSMUSG00000097222	68434	3.50863	4.40563	15.8092	8.92851e-06	0.000178952	4.52724	UP
37717	A_51_P319879	Acadm	NM_007382	ref|Mus musculus acyl-Coenzyme A dehydrogenase, medium chain (Acadm), nuclear gene encoding mitochondrial protein, mRNA [NM_007382]	ENSMUSG00000062908	11364	4.73365	12.4439	15.7866	8.99739e-06	0.000180157	4.51937	UP
12091	A_55_P2019690	Slc43a1	NM_001081349	ref|Mus musculus solute carrier family 43, member 1 (Slc43a1), transcript variant 1, mRNA [NM_001081349]	ENSMUSG00000027075	72401	4.55641	6.02316	15.7733	9.03821e-06	0.000180635	4.51473	UP
5228	A_55_P2119957	Mlxipl	NM_021455	ref|Mus musculus MLX interacting protein-like (Mlxipl), mRNA [NM_021455]	ENSMUSG00000005373	58805	3.61762	9.71149	15.7731	9.03876e-06	0.000180635	4.51467	UP
5756	A_51_P260850	Cntnap2	NM_025771	ref|Mus musculus contactin associated protein-like 2 (Cntnap2), transcript variant 2, mRNA [NM_025771]	ENSMUSG00000039419	66797	-4.09127	7.4347	-15.7696	9.04965e-06	0.000180678	4.51344	DOWN
19285	A_55_P2150025	Otub1	NM_134150	ref|Mus musculus OTU domain, ubiquitin aldehyde binding 1 (Otub1), mRNA [NM_134150]	ENSMUSG00000024767	107260	-2.68886	11.0649	-15.765	9.0638e-06	0.000180786	4.51184	DOWN
1144	A_55_P1988009	ENSMUST00000165619	ENSMUST00000165619	ens|predicted gene 3252 [Source:MGI Symbol;Acc:MGI:3781430] [ENSMUST00000165619]	ENSMUST00000165619	NA	-3.02294	10.8764	-15.7485	9.11496e-06	0.00018163	4.50607	DOWN
6928	A_51_P316042	Card11	NM_175362	ref|Mus musculus caspase recruitment domain family, member 11 (Card11), mRNA [NM_175362]	ENSMUSG00000036526	108723	4.04628	6.3457	15.7412	9.13767e-06	0.000181897	4.50352	UP
18686	A_51_P453909	Cyp2f2	NM_007817	ref|Mus musculus cytochrome P450, family 2, subfamily f, polypeptide 2 (Cyp2f2), mRNA [NM_007817]	ENSMUSG00000052974	13107	7.97274	6.91364	15.7345	9.15849e-06	0.000181897	4.50119	UP
15932	A_52_P571371	Tmem144	NM_027495	ref|Mus musculus transmembrane protein 144 (Tmem144), mRNA [NM_027495]	ENSMUSG00000027956	70652	-3.00783	7.71292	-15.7307	9.17035e-06	0.000181897	4.49986	DOWN
39365	A_51_P491987	Ripk3	NM_019955	ref|Mus musculus receptor-interacting serine-threonine kinase 3 (Ripk3), transcript variant 1, mRNA [NM_019955]	ENSMUSG00000022221	56532	4.03734	5.60922	15.7302	9.17177e-06	0.000181897	4.4997	UP
23872	A_55_P2069037	ENSMUST00000037953	ENSMUST00000037953	ens|RIKEN cDNA 2810032G03 gene [Source:MGI Symbol;Acc:MGI:1919919] [ENSMUST00000037953]	ENSMUST00000037953	NA	-2.71485	5.69497	-15.7292	9.17512e-06	0.000181897	4.49933	DOWN
22026	A_55_P2029370	Stk32a	NM_178749	ref|Mus musculus serine/threonine kinase 32A (Stk32a), mRNA [NM_178749]	ENSMUSG00000039954	269019	-3.23685	8.07563	-15.7272	9.18122e-06	0.000181897	4.49865	DOWN
29264	A_55_P1964653	Cntnap4	NM_130457	ref|Mus musculus contactin associated protein-like 4 (Cntnap4), mRNA [NM_130457]	ENSMUSG00000031772	170571	-4.35793	6.11153	-15.7096	9.2365e-06	0.000182817	4.49249	DOWN
13967	A_55_P2053532	Rundc3b	ENSMUST00000115378	ens|RUN domain containing 3B [Source:MGI Symbol;Acc:MGI:2685286] [ENSMUST00000115378]	ENSMUSG00000040570	242819	-2.89333	6.82001	-15.6983	9.27245e-06	0.000183143	4.48851	DOWN
35302	A_55_P2071349	Trh	NM_009426	ref|Mus musculus thyrotropin releasing hormone (Trh), mRNA [NM_009426]	ENSMUSG00000005892	22044	-6.20973	6.92455	-15.6952	9.28215e-06	0.000183143	4.48744	DOWN
31714	A_55_P1963807	Actg2	NM_009610	ref|Mus musculus actin, gamma 2, smooth muscle, enteric (Actg2), mRNA [NM_009610]	ENSMUSG00000059430	11468	5.80879	5.96332	15.6947	9.28381e-06	0.000183143	4.48725	UP
6388	A_51_P346165	Agpat4	NM_026644	ref|Mus musculus 1-acylglycerol-3-phosphate O-acyltransferase 4 (lysophosphatidic acid acyltransferase, delta) (Agpat4), mRNA [NM_026644]	ENSMUSG00000023827	68262	-3.70128	12.4593	-15.6905	9.29721e-06	0.000183143	4.48577	DOWN
33237	A_55_P2068673	Stmn2	NM_025285	ref|Mus musculus stathmin-like 2 (Stmn2), mRNA [NM_025285]	ENSMUSG00000027500	20257	-3.91085	12.8819	-15.6893	9.30083e-06	0.000183143	4.48538	DOWN
15456	A_52_P527260	Slc35f3	NM_175434	ref|Mus musculus solute carrier family 35, member F3 (Slc35f3), mRNA [NM_175434]	ENSMUSG00000057060	210027	-5.29848	7.92574	-15.6877	9.30617e-06	0.000183143	4.48479	DOWN
23005	A_51_P268069	Six1	NM_009189	ref|Mus musculus sine oculis-related homeobox 1 homolog (Drosophila) (Six1), mRNA [NM_009189]	ENSMUSG00000051367	20471	6.60819	6.43155	15.6791	9.33338e-06	0.000183503	4.48179	UP
3090	A_51_P109050	Paqr4	NM_023824	ref|Mus musculus progestin and adipoQ receptor family member IV (Paqr4), mRNA [NM_023824]	ENSMUSG00000023909	76498	-3.37388	11.7062	-15.6749	9.34691e-06	0.000183594	4.48031	DOWN
9182	A_55_P2128303	Ids	NM_010498	ref|Mus musculus iduronate 2-sulfatase (Ids), transcript variant 1, mRNA [NM_010498]	ENSMUSG00000035847	15931	-2.80547	10.107	-15.6674	9.37099e-06	0.000183892	4.47767	DOWN
12467	A_51_P338878	P2ry12	NM_027571	ref|Mus musculus purinergic receptor P2Y, G-protein coupled 12 (P2ry12), mRNA [NM_027571]	ENSMUSG00000036353	70839	-3.44243	8.01522	-15.6615	9.38988e-06	0.000184088	4.4756	DOWN
35403	A_51_P193146	Ms4a6c	NM_028595	ref|Mus musculus membrane-spanning 4-domains, subfamily A, member 6C (Ms4a6c), transcript variant 1, mRNA [NM_028595]	ENSMUSG00000079419	73656	2.92913	5.76219	15.6392	9.462e-06	0.000185176	4.46775	UP
4670	A_52_P483336	Ms4a1	NM_007641	ref|Mus musculus membrane-spanning 4-domains, subfamily A, member 1 (Ms4a1), mRNA [NM_007641]	ENSMUSG00000024673	12482	6.29865	5.837	15.6388	9.46331e-06	0.000185176	4.4676	UP
22089	A_52_P86353	Cacng5	NM_080644	ref|Mus musculus calcium channel, voltage-dependent, gamma subunit 5 (Cacng5), transcript variant 2, mRNA [NM_080644]	ENSMUSG00000040373	140723	-4.32476	6.92989	-15.6355	9.474e-06	0.000185209	4.46645	DOWN
6369	A_55_P2079679	B3gat2	NM_172124	ref|Mus musculus beta-1,3-glucuronyltransferase 2 (glucuronosyltransferase S) (B3gat2), mRNA [NM_172124]	ENSMUSG00000026156	280645	-3.01259	6.35184	-15.6253	9.50727e-06	0.000185565	4.46285	DOWN
4883	A_55_P2033225	Cabp7	NM_138948	ref|Mus musculus calcium binding protein 7 (Cabp7), mRNA [NM_138948]	ENSMUSG00000009075	192650	-3.08279	5.70765	-15.6244	9.51015e-06	0.000185565	4.46254	DOWN
25756	A_55_P2052385	Gbp6	NM_194336	ref|Mus musculus guanylate binding protein 6 (Gbp6), mRNA [NM_194336]	ENSMUSG00000104713	100702	2.42511	6.59969	15.6022	9.58311e-06	0.000186812	4.45469	UP
21496	A_66_P114782	Nr2f1	NM_010151	ref|Mus musculus nuclear receptor subfamily 2, group F, member 1 (Nr2f1), mRNA [NM_010151]	ENSMUSG00000069171	13865	-3.01041	10.7325	-15.5959	9.60381e-06	0.000187039	4.45247	DOWN
32522	A_51_P424722	Wdr54	NM_023790	ref|Mus musculus WD repeat domain 54 (Wdr54), mRNA [NM_023790]	ENSMUSG00000030032	75659	-3.85073	6.97467	-15.5901	9.62315e-06	0.000187081	4.4504	DOWN
7373	A_55_P2068892	Il6ra	NM_010559	ref|Mus musculus interleukin 6 receptor, alpha (Il6ra), mRNA [NM_010559]	ENSMUSG00000027947	16194	3.22937	10.4468	15.5898	9.62412e-06	0.000187081	4.4503	UP
432	A_51_P191463	H2-M2	ENSMUST00000077662	ens|histocompatibility 2, M region locus 2 [Source:MGI Symbol;Acc:MGI:95914] [ENSMUST00000077662]	ENSMUSG00000016283	14990	2.5426	9.40672	15.5805	9.65496e-06	0.000187416	4.44701	UP
25665	A_55_P2067478	Cdh6	NM_007666	ref|Mus musculus cadherin 6 (Cdh6), mRNA [NM_007666]	ENSMUSG00000039385	12563	-2.62337	6.80703	-15.5791	9.6595e-06	0.000187416	4.44653	DOWN
27840	A_66_P110091	ENSMUST00000144029	ENSMUST00000144029	ens|predicted gene 12371 [Source:MGI Symbol;Acc:MGI:3652322] [ENSMUST00000144029]	ENSMUST00000144029	NA	-3.12325	6.88606	-15.5665	9.70143e-06	0.000188053	4.44208	DOWN
4521	A_52_P1189049	Hs3st4	ENSMUST00000106437	ens|heparan sulfate (glucosamine) 3-O-sulfotransferase 4 [Source:MGI Symbol;Acc:MGI:1333792] [ENSMUST00000106437]	ENSMUSG00000078591	628779	-3.32672	5.56168	-15.5552	9.73958e-06	0.000188615	4.43805	DOWN
4160	A_55_P1967683	Bex4	NM_212457	ref|Mus musculus brain expressed gene 4 (Bex4), mRNA [NM_212457]	ENSMUSG00000047844	406217	-3.74862	8.23456	-15.5481	9.76333e-06	0.00018865	4.43554	DOWN
20802	A_51_P158073	A230050P20Rik	NM_175687	ref|Mus musculus RIKEN cDNA A230050P20 gene (A230050P20Rik), mRNA [NM_175687]	ENSMUSG00000038884	319278	-2.59128	11.8272	-15.547	9.76707e-06	0.00018865	4.43515	DOWN
29423	A_51_P480136	Cryba2	NM_021541	ref|Mus musculus crystallin, beta A2 (Cryba2), mRNA [NM_021541]	ENSMUSG00000006546	12958	-3.13406	6.00038	-15.5433	9.77946e-06	0.00018865	4.43385	DOWN
2142	A_55_P2060158	Ermn	NM_029972	ref|Mus musculus ermin, ERM-like protein (Ermn), mRNA [NM_029972]	ENSMUSG00000026830	77767	-3.65227	11.1749	-15.5409	9.78756e-06	0.00018865	4.43299	DOWN
13013	A_52_P140356	Calm3	NM_007590	ref|Mus musculus calmodulin 3 (Calm3), mRNA [NM_007590]	ENSMUSG00000019370	12315	-2.47465	12.3046	-15.5373	9.79968e-06	0.00018865	4.43172	DOWN
22956	A_55_P2129232	Calm2	NM_007589	ref|Mus musculus calmodulin 2 (Calm2), mRNA [NM_007589]	ENSMUSG00000036438	12314	-2.56419	15.4335	-15.536	9.80422e-06	0.00018865	4.43125	DOWN
25997	A_55_P2189955	Vwa5b2	NM_001144953	ref|Mus musculus von Willebrand factor A domain containing 5B2 (Vwa5b2), transcript variant 1, mRNA [NM_001144953]	ENSMUSG00000046613	328643	-3.57293	7.04712	-15.5357	9.80533e-06	0.00018865	4.43113	DOWN
2150	A_55_P1956557	Rab3a	NM_001166399	ref|Mus musculus RAB3A, member RAS oncogene family (Rab3a), transcript variant 1, mRNA [NM_001166399]	ENSMUSG00000031840	19339	-4.08158	14.4775	-15.5293	9.82696e-06	0.000188665	4.42886	DOWN
27023	A_55_P2085651	Ankrd34a	NM_001024851	ref|Mus musculus ankyrin repeat domain 34A (Ankrd34a), mRNA [NM_001024851]	ENSMUSG00000049097	545554	-3.93369	7.95131	-15.5286	9.82927e-06	0.000188665	4.42862	DOWN
1995	A_55_P2159522	Col14a1	NM_181277	ref|Mus musculus collagen, type XIV, alpha 1 (Col14a1), mRNA [NM_181277]	ENSMUSG00000022371	12818	4.19334	6.07893	15.5274	9.83353e-06	0.000188665	4.42818	UP
8918	A_55_P2009427	Nrsn2	NM_001009948	ref|Mus musculus neurensin 2 (Nrsn2), mRNA [NM_001009948]	ENSMUSG00000059361	228777	-4.12097	11.6839	-15.5174	9.86738e-06	0.000189138	4.42464	DOWN
2459	A_55_P2185397	Copz2	NM_019877	ref|Mus musculus coatomer protein complex, subunit zeta 2 (Copz2), mRNA [NM_019877]	ENSMUSG00000018672	56358	2.83157	8.02439	15.5145	9.87727e-06	0.000189153	4.42361	UP
23024	A_55_P2008991	Syp	NM_009305	ref|Mus musculus synaptophysin (Syp), mRNA [NM_009305]	ENSMUSG00000031144	20977	-3.97986	13.9149	-15.5102	9.89195e-06	0.000189258	4.42208	DOWN
36216	A_52_P577329	Tmem88b	NM_001033394	ref|Mus musculus transmembrane protein 88B (Tmem88b), mRNA [NM_001033394]	ENSMUSG00000073680	320587	-4.51674	6.64266	-15.4756	1.00114e-05	0.000191279	4.40973	DOWN
28046	A_51_P424532	Vnn1	NM_011704	ref|Mus musculus vanin 1 (Vnn1), mRNA [NM_011704]	ENSMUSG00000037440	22361	3.72762	5.04348	15.4742	1.00161e-05	0.000191279	4.40925	UP
33747	A_52_P512575	Hopx	NM_175606	ref|Mus musculus HOP homeobox (Hopx), transcript variant 1, mRNA [NM_175606]	ENSMUSG00000059325	74318	-3.47678	11.0157	-15.4713	1.00261e-05	0.000191292	4.40823	DOWN
35692	A_66_P102607	Btrc	NM_001037758	ref|Mus musculus beta-transducin repeat containing protein (Btrc), transcript variant 1, mRNA [NM_001037758]	ENSMUSG00000025217	12234	-2.69927	8.79345	-15.4628	1.00558e-05	0.000191682	4.40518	DOWN
4154	A_51_P100208	Opcml	NM_177906	ref|Mus musculus opioid binding protein/cell adhesion molecule-like (Opcml), mRNA [NM_177906]	ENSMUSG00000062257	330908	-2.84561	5.99578	-15.4588	1.00698e-05	0.000191773	4.40374	DOWN
4470	A_51_P254262	Nxph3	NM_130858	ref|Mus musculus neurexophilin 3 (Nxph3), mRNA [NM_130858]	ENSMUSG00000046719	104079	-2.88826	9.01699	-15.4457	1.01156e-05	0.000192391	4.39907	DOWN
10006	A_52_P455428	Glra2	NM_183427	ref|Mus musculus glycine receptor, alpha 2 subunit (Glra2), mRNA [NM_183427]	ENSMUSG00000018589	237213	-4.4409	6.01294	-15.442	1.01287e-05	0.000192391	4.39774	DOWN
5186	A_55_P1977363	Ptprn2	NM_011215	ref|Mus musculus protein tyrosine phosphatase, receptor type, N polypeptide 2 (Ptprn2), mRNA [NM_011215]	ENSMUSG00000056553	19276	-2.35599	5.82589	-15.4413	1.01312e-05	0.000192391	4.39749	DOWN
11399	A_51_P366672	Slc36a2	NM_153170	ref|Mus musculus solute carrier family 36 (proton/amino acid symporter), member 2 (Slc36a2), mRNA [NM_153170]	ENSMUSG00000020264	246049	8.72633	8.48245	15.4389	1.01396e-05	0.000192391	4.39664	UP
17811	A_66_P118863	Ncald	NM_134094	ref|Mus musculus neurocalcin delta (Ncald), transcript variant 1, mRNA [NM_134094]	ENSMUSG00000051359	52589	-2.90838	7.55343	-15.4268	1.01822e-05	0.000193022	4.39232	DOWN
30827	A_51_P177171	Tie1	NM_011587	ref|Mus musculus tyrosine kinase with immunoglobulin-like and EGF-like domains 1 (Tie1), mRNA [NM_011587]	ENSMUSG00000033191	21846	3.96846	7.21989	15.4133	1.02303e-05	0.000193718	4.38746	UP
21407	A_51_P361830	Lgi2	NM_144945	ref|Mus musculus leucine-rich repeat LGI family, member 2 (Lgi2), mRNA [NM_144945]	ENSMUSG00000039252	246316	-2.7299	10.2818	-15.4112	1.02377e-05	0.000193718	4.38672	DOWN
38603	A_55_P2095563	Slc8a2	NM_148946	ref|Mus musculus solute carrier family 8 (sodium/calcium exchanger), member 2 (Slc8a2), mRNA [NM_148946]	ENSMUSG00000030376	110891	-4.31597	9.42633	-15.3944	1.0298e-05	0.000194621	4.38067	DOWN
4246	A_51_P350048	Gstt2	NM_010361	ref|Mus musculus glutathione S-transferase, theta 2 (Gstt2), mRNA [NM_010361]	ENSMUSG00000033318	14872	3.00436	8.49972	15.3926	1.03042e-05	0.000194621	4.38004	UP
7319	A_52_P423814	Cox8b	NM_007751	ref|Mus musculus cytochrome c oxidase, subunit VIIIb (Cox8b), nuclear gene encoding mitochondrial protein, mRNA [NM_007751]	ENSMUSG00000025488	12869	8.41676	11.5074	15.3835	1.03371e-05	0.000195064	4.37676	UP
10118	A_51_P364657	Rnf32	NM_021470	ref|Mus musculus ring finger protein 32 (Rnf32), mRNA [NM_021470]	ENSMUSG00000029130	56874	-2.70601	6.37576	-15.3773	1.03592e-05	0.000195132	4.37456	DOWN
34092	A_51_P169693	Bst2	NM_198095	ref|Mus musculus bone marrow stromal cell antigen 2 (Bst2), mRNA [NM_198095]	ENSMUSG00000046718	69550	2.99077	9.3639	15.3772	1.03596e-05	0.000195132	4.37452	UP
10225	A_55_P2235958	ENSMUST00000079186	ENSMUST00000079186	ens|predicted gene 839 [Source:MGI Symbol;Acc:MGI:2685685] [ENSMUST00000079186]	ENSMUST00000079186	NA	-6.88987	9.43708	-15.3681	1.03925e-05	0.000195489	4.37125	DOWN
8058	A_55_P2181976	Akap11	NM_001164503	ref|Mus musculus A kinase (PRKA) anchor protein 11 (Akap11), mRNA [NM_001164503]	ENSMUSG00000022016	219181	-2.41466	9.76074	-15.3668	1.03976e-05	0.000195489	4.37075	DOWN
10542	A_55_P2129776	Prrt1	NM_030890	ref|Mus musculus proline-rich transmembrane protein 1 (Prrt1), mRNA [NM_030890]	ENSMUSG00000015476	260297	-3.06526	9.11503	-15.3575	1.04314e-05	0.000195782	4.3674	DOWN
23294	A_55_P2017944	Etfb	NM_026695	ref|Mus musculus electron transferring flavoprotein, beta polypeptide (Etfb), mRNA [NM_026695]	ENSMUSG00000004610	110826	3.02194	14.677	15.3566	1.04344e-05	0.000195782	4.3671	UP
7036	A_52_P486718	Tspyl5	NM_001085421	ref|Mus musculus testis-specific protein, Y-encoded-like 5 (Tspyl5), mRNA [NM_001085421]	ENSMUSG00000038984	239364	-2.55182	6.30819	-15.3535	1.04459e-05	0.000195782	4.36597	DOWN
25338	A_55_P2075385	Orai2	NM_178751	ref|Mus musculus ORAI calcium release-activated calcium modulator 2 (Orai2), mRNA [NM_178751]	ENSMUSG00000039747	269717	-2.46977	8.70524	-15.3521	1.04511e-05	0.000195782	4.36546	DOWN
2047	A_51_P165451	Pbld2	NM_026085	ref|Mus musculus phenazine biosynthesis-like protein domain containing 2 (Pbld2), mRNA [NM_026085]	ENSMUSG00000020072	67307	2.58134	6.12675	15.3403	1.04942e-05	0.000196412	4.36121	UP
32506	A_55_P2164659	Tlx2	NM_009392	ref|Mus musculus T-cell leukemia, homeobox 2 (Tlx2), mRNA [NM_009392]	ENSMUSG00000068327	21909	3.96635	5.31385	15.3345	1.05154e-05	0.00019663	4.35913	UP
13184	A_55_P1999641	Frem1	NM_177863	ref|Mus musculus Fras1 related extracellular matrix protein 1 (Frem1), transcript variant 1, mRNA [NM_177863]	ENSMUSG00000059049	329872	-2.47146	5.88019	-15.3288	1.05365e-05	0.000196689	4.35706	DOWN
32656	A_66_P118059	Cdk5r2	NM_009872	ref|Mus musculus cyclin-dependent kinase 5, regulatory subunit 2 (p39) (Cdk5r2), mRNA [NM_009872]	ENSMUSG00000090071	12570	-3.21424	5.54974	-15.3267	1.0544e-05	0.000196689	4.35633	DOWN
15115	A_55_P2082005	Lingo2	NM_001165999	ref|Mus musculus leucine rich repeat and Ig domain containing 2 (Lingo2), transcript variant 1, mRNA [NM_001165999]	ENSMUSG00000045083	242384	-4.72687	6.85708	-15.3259	1.05471e-05	0.000196689	4.35602	DOWN
22981	A_52_P139629	Pfn4	NM_028376	ref|Mus musculus profilin family, member 4 (Pfn4), mRNA [NM_028376]	ENSMUSG00000020639	382562	-2.4232	7.05254	-15.3125	1.05969e-05	0.000197262	4.35117	DOWN
14037	A_66_P104314	Apol6	NM_001163621	ref|Mus musculus apolipoprotein L 6 (Apol6), transcript variant 2, mRNA [NM_001163621]	ENSMUSG00000033576	71939	2.90725	5.09583	15.3124	1.0597e-05	0.000197262	4.35116	UP
12536	A_51_P416585	Hdlbp	NM_133808	ref|Mus musculus high density lipoprotein (HDL) binding protein (Hdlbp), mRNA [NM_133808]	ENSMUSG00000034088	110611	2.54828	11.4551	15.3039	1.06286e-05	0.000197672	4.34808	UP
23820	A_51_P265806	Clca2	NM_030601	ref|Mus musculus chloride channel calcium activated 2 (Clca2), mRNA [NM_030601]	ENSMUSG00000036960	229933	3.71406	5.93489	15.2952	1.06613e-05	0.000198102	4.34492	UP
5302	A_55_P2105256	Trim47	NM_001205081	ref|Mus musculus tripartite motif-containing 47 (Trim47), transcript variant 1, mRNA [NM_001205081]	ENSMUSG00000020773	217333	3.35854	9.1865	15.2906	1.06782e-05	0.000198239	4.34327	UP
18169	A_51_P177092	Stat4	NM_011487	ref|Mus musculus signal transducer and activator of transcription 4 (Stat4), mRNA [NM_011487]	ENSMUSG00000062939	20849	2.99386	5.33742	15.2852	1.06988e-05	0.000198379	4.34129	UP
20489	A_55_P2076846	Tead2	NM_011565	ref|Mus musculus TEA domain family member 2 (Tead2), mRNA [NM_011565]	ENSMUSG00000030796	21677	2.38352	7.11026	15.283	1.07068e-05	0.000198379	4.34051	UP
34069	A_55_P2094831	Slco1c1	NM_021471	ref|Mus musculus solute carrier organic anion transporter family, member 1c1 (Slco1c1), transcript variant 1, mRNA [NM_021471]	ENSMUSG00000030235	58807	-4.43271	6.65375	-15.2809	1.07146e-05	0.000198379	4.33976	DOWN
35055	A_52_P635598	Rgs8	NM_026380	ref|Mus musculus regulator of G-protein signaling 8 (Rgs8), mRNA [NM_026380]	ENSMUSG00000042671	67792	-3.38645	6.59883	-15.2723	1.07473e-05	0.000198644	4.33662	DOWN
24639	A_55_P2296320	ENSMUST00000151696	ENSMUST00000151696	ens|predicted gene 13112 [Source:MGI Symbol;Acc:MGI:3701127] [ENSMUST00000151696]	ENSMUST00000151696	NA	-2.91029	5.48326	-15.272	1.07482e-05	0.000198644	4.33653	DOWN
725	A_66_P100777	Sstr1	NM_009216	ref|Mus musculus somatostatin receptor 1 (Sstr1), mRNA [NM_009216]	ENSMUSG00000035431	20605	-2.84176	5.78191	-15.2623	1.0785e-05	0.000199145	4.33301	DOWN
3405	A_51_P232371	Stab1	NM_138672	ref|Mus musculus stabilin 1 (Stab1), mRNA [NM_138672]	ENSMUSG00000042286	192187	3.13144	8.36985	15.2486	1.08371e-05	0.00019993	4.32802	UP
5379	A_66_P139683	Zbp1	NM_021394	ref|Mus musculus Z-DNA binding protein 1 (Zbp1), transcript variant 1, mRNA [NM_021394]	ENSMUSG00000027514	58203	2.50244	5.17523	15.2434	1.08568e-05	0.000200113	4.32615	UP
15773	A_55_P2130399	Rilp	NM_001029938	ref|Mus musculus Rab interacting lysosomal protein (Rilp), mRNA [NM_001029938]	ENSMUSG00000038195	280408	2.35703	11.8565	15.2331	1.08962e-05	0.000200465	4.3224	UP
29333	A_51_P234140	Cdkl1	NM_183294	ref|Mus musculus cyclin-dependent kinase-like 1 (CDC2-related kinase) (Cdkl1), mRNA [NM_183294]	ENSMUSG00000020990	71091	-2.4827	8.05035	-15.2324	1.08988e-05	0.000200465	4.32216	DOWN
563	A_51_P111669	Gpr149	NM_177346	ref|Mus musculus G protein-coupled receptor 149 (Gpr149), mRNA [NM_177346]	ENSMUSG00000043441	229357	-2.75423	4.78215	-15.2308	1.0905e-05	0.000200465	4.32158	DOWN
3536	A_52_P276430	Rimklb	NM_027664	ref|Mus musculus ribosomal modification protein rimK-like family member B (Rimklb), mRNA [NM_027664]	ENSMUSG00000040649	108653	-2.50425	5.18482	-15.228	1.0916e-05	0.000200487	4.32053	DOWN
6884	A_52_P577533	Vat1l	NM_173016	ref|Mus musculus vesicle amine transport protein 1 homolog-like (T. californica) (Vat1l), mRNA [NM_173016]	ENSMUSG00000046844	270097	-3.42901	12.1644	-15.2228	1.09357e-05	0.000200487	4.31867	DOWN
19851	A_52_P37498	Dpcd	NM_172639	ref|Mus musculus deleted in primary ciliary dyskinesia (Dpcd), mRNA [NM_172639]	ENSMUSG00000041035	226162	-2.4087	12.1467	-15.2212	1.09421e-05	0.000200487	4.31807	DOWN
37212	A_55_P2146384	Filip1	NM_001081243	ref|Mus musculus filamin A interacting protein 1 (Filip1), mRNA [NM_001081243]	ENSMUSG00000034898	70598	2.53255	6.52817	15.2204	1.0945e-05	0.000200487	4.31779	UP
36100	A_51_P511285	Kcnj9	NM_008429	ref|Mus musculus potassium inwardly-rectifying channel, subfamily J, member 9 (Kcnj9), mRNA [NM_008429]	ENSMUSG00000038026	16524	-3.59003	6.72247	-15.2108	1.09824e-05	0.000200993	4.31427	DOWN
17234	A_51_P331752	Ccl11	NM_011330	ref|Mus musculus chemokine (C-C motif) ligand 11 (Ccl11), mRNA [NM_011330]	ENSMUSG00000020676	20292	5.40449	5.99947	15.205	1.10046e-05	0.000201221	4.31218	UP
32979	A_51_P273433	Prkg2	NM_008926	ref|Mus musculus protein kinase, cGMP-dependent, type II (Prkg2), mRNA [NM_008926]	ENSMUSG00000029334	19092	-2.75362	7.30105	-15.1747	1.11229e-05	0.000203205	4.30112	DOWN
13736	A_66_P119164	Zfp354c	NM_013922	ref|Mus musculus zinc finger protein 354C (Zfp354c), mRNA [NM_013922]	ENSMUSG00000044807	30944	-2.63751	7.42492	-15.1602	1.11803e-05	0.000204072	4.2958	DOWN
24509	A_55_P2003638	Stxbp6	NM_144552	ref|Mus musculus syntaxin binding protein 6 (amisyn) (Stxbp6), mRNA [NM_144552]	ENSMUSG00000046314	217517	-2.59801	10.4862	-15.1509	1.12168e-05	0.000204408	4.29243	DOWN
25787	A_51_P246677	Rec8	NM_020002	ref|Mus musculus REC8 homolog (yeast) (Rec8), mRNA [NM_020002]	ENSMUSG00000002324	56739	-3.64607	10.5485	-15.1469	1.12329e-05	0.000204408	4.29095	DOWN
2822	A_55_P2136847	Slc1a2	NM_001077514	ref|Mus musculus solute carrier family 1 (glial high affinity glutamate transporter), member 2 (Slc1a2), transcript variant 1, mRNA [NM_001077514]	ENSMUSG00000005089	20511	-5.59662	8.29558	-15.1462	1.12356e-05	0.000204408	4.2907	DOWN
28437	A_51_P513776	ENSMUST00000103535	ENSMUST00000103535	ens|predicted gene, 16865 [Source:MGI Symbol;Acc:MGI:4439789] [ENSMUST00000103535]	ENSMUST00000103535	NA	4.93634	6.00565	15.1455	1.12383e-05	0.000204408	4.29045	UP
16099	A_55_P2046393	Rcn3	NM_026555	ref|Mus musculus reticulocalbin 3, EF-hand calcium binding domain (Rcn3), mRNA [NM_026555]	ENSMUSG00000019539	52377	3.59986	9.97919	15.1322	1.12916e-05	0.000205197	4.28555	UP
33719	A_52_P367745	Acads	NM_007383	ref|Mus musculus acyl-Coenzyme A dehydrogenase, short chain (Acads), nuclear gene encoding mitochondrial protein, mRNA [NM_007383]	ENSMUSG00000029545	11409	4.24822	8.45877	15.1097	1.1382e-05	0.000206658	4.2773	UP
10172	A_52_P113043	Kctd4	NM_026214	ref|Mus musculus potassium channel tetramerisation domain containing 4 (Kctd4), mRNA [NM_026214]	ENSMUSG00000046523	67516	-3.19172	6.97034	-15.094	1.14456e-05	0.00020763	4.27153	DOWN
1519	A_51_P125260	Acaa2	NM_177470	ref|Mus musculus acetyl-Coenzyme A acyltransferase 2 (mitochondrial 3-oxoacyl-Coenzyme A thiolase) (Acaa2), nuclear gene encoding mitochondrial protein, mRNA [NM_177470]	ENSMUSG00000036880	52538	4.86546	13.6077	15.0854	1.14804e-05	0.000208079	4.26839	UP
21717	A_55_P2128597	Nr1h3	NM_013839	ref|Mus musculus nuclear receptor subfamily 1, group H, member 3 (Nr1h3), transcript variant 1, mRNA [NM_013839]	ENSMUSG00000002108	22259	3.69887	10.1534	15.0813	1.14971e-05	0.000208198	4.26689	UP
28284	A_66_P101519	Abcc9	NM_021041	ref|Mus musculus ATP-binding cassette, sub-family C (CFTR/MRP), member 9 (Abcc9), transcript variant 2, mRNA [NM_021041]	ENSMUSG00000030249	20928	4.5718	8.71348	15.0745	1.15252e-05	0.00020842	4.26436	UP
4315	A_51_P308298	Myl9	NM_172118	ref|Mus musculus myosin, light polypeptide 9, regulatory (Myl9), mRNA [NM_172118]	ENSMUSG00000067818	98932	3.73803	11.8087	15.0734	1.15295e-05	0.00020842	4.26397	UP
26230	A_51_P448971	Sncb	NM_033610	ref|Mus musculus synuclein, beta (Sncb), mRNA [NM_033610]	ENSMUSG00000034891	104069	-4.89968	7.83752	-15.0703	1.15422e-05	0.000208467	4.26283	DOWN
39352	A_51_P321150	Lyz2	NM_017372	ref|Mus musculus lysozyme 2 (Lyz2), mRNA [NM_017372]	ENSMUSG00000069516	17105	4.3432	7.18271	15.0592	1.1588e-05	0.000208967	4.25873	UP
927	A_55_P2185900	Nrg4	NM_032002	ref|Mus musculus neuregulin 4 (Nrg4), mRNA [NM_032002]	ENSMUSG00000032311	83961	6.74255	7.0595	15.0587	1.15902e-05	0.000208967	4.25854	UP
39469	A_51_P196695	Il7r	NM_008372	ref|Mus musculus interleukin 7 receptor (Il7r), mRNA [NM_008372]	ENSMUSG00000003882	16197	3.20238	5.32958	15.0556	1.16028e-05	0.000209012	4.25741	UP
19529	A_51_P345367	Psmb8	NM_010724	ref|Mus musculus proteasome (prosome, macropain) subunit, beta type 8 (large multifunctional peptidase 7) (Psmb8), mRNA [NM_010724]	ENSMUSG00000024338	16913	2.95336	9.42829	15.05	1.16258e-05	0.00020908	4.25536	UP
35038	A_51_P350453	Pdk4	NM_013743	ref|Mus musculus pyruvate dehydrogenase kinase, isoenzyme 4 (Pdk4), nuclear gene encoding mitochondrial protein, mRNA [NM_013743]	ENSMUSG00000019577	27273	5.44366	11.3005	15.0498	1.16268e-05	0.00020908	4.25527	UP
4226	A_52_P527106	Arhgap12	NM_001039692	ref|Mus musculus Rho GTPase activating protein 12 (Arhgap12), transcript variant 1, mRNA [NM_001039692]	ENSMUSG00000041225	75415	-2.78943	9.32877	-15.0414	1.16615e-05	0.000209521	4.25218	DOWN
24278	A_55_P2075220	Kcnab2	NM_010598	ref|Mus musculus potassium voltage-gated channel, shaker-related subfamily, beta member 2 (Kcnab2), mRNA [NM_010598]	ENSMUSG00000028931	16498	-3.04399	5.95506	-15.031	1.17048e-05	0.000210052	4.24834	DOWN
10504	A_52_P152219	Rpgrip1l	NM_173431	ref|Mus musculus Rpgrip1-like (Rpgrip1l), mRNA [NM_173431]	ENSMUSG00000033282	244585	-2.57719	7.48428	-15.0294	1.17114e-05	0.000210052	4.24776	DOWN
10509	A_55_P2116305	Tnfrsf25	NM_033042	ref|Mus musculus tumor necrosis factor receptor superfamily, member 25 (Tnfrsf25), mRNA [NM_033042]	ENSMUSG00000024793	85030	3.36823	7.49608	15.0151	1.17717e-05	0.00021095	4.24244	UP
29725	A_51_P262325	Nek11	NM_172461	ref|Mus musculus NIMA (never in mitosis gene a)-related expressed kinase 11 (Nek11), mRNA [NM_172461]	ENSMUSG00000035032	208583	-3.50225	5.47371	-15.0081	1.18011e-05	0.00021112	4.23985	DOWN
6374	A_55_P2002572	Ephx2	NM_007940	ref|Mus musculus epoxide hydrolase 2, cytoplasmic (Ephx2), mRNA [NM_007940]	ENSMUSG00000022040	13850	4.79358	9.46776	15.0079	1.18016e-05	0.00021112	4.2398	UP
6943	A_66_P121059	Mirg	NR_028265	ref|Mus musculus miRNA containing gene (Mirg), non-coding RNA [NR_028265]	ENSMUSG00000097391	100040724	-3.54548	9.93407	-14.9994	1.18378e-05	0.000211468	4.23663	DOWN
4515	A_55_P2290388	Rorb	NM_001043354	ref|Mus musculus RAR-related orphan receptor beta (Rorb), transcript variant 1, mRNA [NM_001043354]	ENSMUSG00000036192	225998	-4.16117	7.73356	-14.9985	1.18416e-05	0.000211468	4.2363	DOWN
18998	A_51_P309920	Itga8	NM_001001309	ref|Mus musculus integrin alpha 8 (Itga8), mRNA [NM_001001309]	ENSMUSG00000026768	241226	4.93723	7.52469	14.9788	1.19253e-05	0.000212645	4.22899	UP
11581	A_55_P2042637	Spats1	ENSMUST00000087056	ens|spermatogenesis associated, serine-rich 1 [Source:MGI Symbol;Acc:MGI:1918270] [ENSMUST00000087056]	ENSMUSG00000023935	71020	-2.6147	6.28448	-14.9781	1.19281e-05	0.000212645	4.22875	DOWN
5835	A_55_P2182716	Adig	NM_145635	ref|Mus musculus adipogenin (Adig), mRNA [NM_145635]	ENSMUSG00000044405	246747	8.46327	7.46958	14.974	1.19455e-05	0.000212772	4.22724	UP
13697	A_51_P379976	Arl4a	NM_001039515	ref|Mus musculus ADP-ribosylation factor-like 4A (Arl4a), transcript variant 2, mRNA [NM_001039515]	ENSMUSG00000047446	11861	3.3838	9.56343	14.9623	1.19957e-05	0.000213482	4.22289	UP
4743	A_51_P112627	St6galnac2	NM_009180	ref|Mus musculus ST6 (alpha-N-acetyl-neuraminyl-2,3-beta-galactosyl-1,3)-N-acetylgalactosaminide alpha-2,6-sialyltransferase 2 (St6galnac2), mRNA [NM_009180]	ENSMUSG00000057286	20446	3.07039	8.32623	14.9599	1.2006e-05	0.000213482	4.22199	UP
34530	A_55_P2126662	Cav1	NM_007616	ref|Mus musculus caveolin 1, caveolae protein (Cav1), mRNA [NM_007616]	ENSMUSG00000007655	12389	4.57696	6.8587	14.9465	1.20639e-05	0.000214242	4.21701	UP
19613	A_55_P2087544	Slc12a5	NM_020333	ref|Mus musculus solute carrier family 12, member 5 (Slc12a5), mRNA [NM_020333]	ENSMUSG00000017740	57138	-4.78636	9.61402	-14.9441	1.20742e-05	0.000214242	4.21612	DOWN
6240	A_55_P1961130	Egfem1	NM_029412	ref|Mus musculus EGF-like and EMI domain containing 1 (Egfem1), transcript variant 1, mRNA [NM_029412]	ENSMUSG00000063600	75740	-2.46879	5.48755	-14.9428	1.20799e-05	0.000214242	4.21563	DOWN
24973	A_55_P2093774	Chl1	NM_007697	ref|Mus musculus cell adhesion molecule with homology to L1CAM (Chl1), mRNA [NM_007697]	ENSMUSG00000030077	12661	-2.78563	9.76905	-14.9381	1.21001e-05	0.000214416	4.2139	DOWN
38979	A_55_P1969901	ENSMUST00000103547	ENSMUST00000103547	ens|predicted gene, 16814 [Source:MGI Symbol;Acc:MGI:4439738] [ENSMUST00000103547]	ENSMUST00000103547	NA	3.21311	4.93225	14.9292	1.21391e-05	0.000214848	4.21055	UP
14467	A_55_P2185605	Cd48	NM_007649	ref|Mus musculus CD48 antigen (Cd48), mRNA [NM_007649]	ENSMUSG00000015355	12506	2.70703	7.46289	14.9257	1.21543e-05	0.000214848	4.20926	UP
35502	A_55_P1974014	ENSMUST00000103322	ENSMUST00000103322	ens|immunoglobulin kappa variable 2-109 [Source:MGI Symbol;Acc:MGI:3642626] [ENSMUST00000103322]	ENSMUST00000103322	NA	3.11138	4.67098	14.9239	1.21622e-05	0.000214848	4.20858	UP
28495	A_55_P2002522	Chst10	ENSMUST00000064410	ens|carbohydrate sulfotransferase 10 [Source:MGI Symbol;Acc:MGI:2138283] [ENSMUST00000064410]	ENSMUSG00000026080	98388	-2.88444	6.66928	-14.923	1.21661e-05	0.000214848	4.20825	DOWN
14425	A_55_P2091461	Casp4	NM_007609	ref|Mus musculus caspase 4, apoptosis-related cysteine peptidase (Casp4), mRNA [NM_007609]	ENSMUSG00000033538	12363	3.04614	7.34386	14.9185	1.21858e-05	0.000214849	4.20657	UP
3042	A_55_P2125521	Evx1	NM_007966	ref|Mus musculus even skipped homeotic gene 1 homolog (Evx1), mRNA [NM_007966]	ENSMUSG00000005503	14028	-2.90628	5.75177	-14.9182	1.2187e-05	0.000214849	4.20647	DOWN
10037	A_51_P467629	Efcab10	NM_029152	ref|Mus musculus EF-hand calcium binding domain 10 (Efcab10), mRNA [NM_029152]	ENSMUSG00000020562	75040	-3.60254	6.6883	-14.9111	1.22181e-05	0.000215214	4.20382	DOWN
8885	A_55_P2058023	ENSMUST00000103356	ENSMUST00000103356	ens|immunoglobulin kappa variable 4-57-1 [Source:MGI Symbol;Acc:MGI:2686264] [ENSMUST00000103356]	ENSMUST00000103356	NA	5.87946	5.26567	14.9025	1.22561e-05	0.000215304	4.2006	UP
21434	A_55_P2064547	Tuba1c	BC022182	gb|Mus musculus tubulin, alpha 1C, mRNA (cDNA clone MGC:14067 IMAGE:3661220), complete cds. [BC022182]	ENSMUSG00000043091	22146	3.49276	9.39711	14.8999	1.22673e-05	0.000215304	4.19965	UP
38395	A_55_P2040549	Phox2b	NM_008888	ref|Mus musculus paired-like homeobox 2b (Phox2b), mRNA [NM_008888]	ENSMUSG00000012520	18935	3.87591	4.28548	14.8984	1.22742e-05	0.000215304	4.19907	UP
39149	A_55_P2003221	Gimap3	NM_031247	ref|Mus musculus GTPase, IMAP family member 3 (Gimap3), nuclear gene encoding mitochondrial protein, mRNA [NM_031247]	ENSMUSG00000039264	83408	5.8467	6.31078	14.897	1.228e-05	0.000215304	4.19858	UP
18569	A_51_P490305	Ifi30	NM_023065	ref|Mus musculus interferon gamma inducible protein 30 (Ifi30), mRNA [NM_023065]	ENSMUSG00000110777	65972	3.21445	8.76752	14.8968	1.22812e-05	0.000215304	4.19848	UP
8698	A_51_P490388	Nudt8	NM_025529	ref|Mus musculus nudix (nucleoside diphosphate linked moiety X)-type motif 8 (Nudt8), mRNA [NM_025529]	ENSMUSG00000110949	66387	2.6712	9.68897	14.8957	1.22858e-05	0.000215304	4.19808	UP
34163	A_51_P335460	Scin	NM_009132	ref|Mus musculus scinderin (Scin), transcript variant 2, mRNA [NM_009132]	ENSMUSG00000002565	20259	3.15288	5.22971	14.8908	1.23076e-05	0.000215504	4.19624	UP
4664	A_66_P138319	Acox2	NM_053115	ref|Mus musculus acyl-Coenzyme A oxidase 2, branched chain (Acox2), transcript variant 1, mRNA [NM_053115]	ENSMUSG00000021751	93732	3.61283	6.27528	14.8846	1.23351e-05	0.000215801	4.19393	UP
20567	A_55_P2163353	Sox3	NM_009237	ref|Mus musculus SRY-box containing gene 3 (Sox3), mRNA [NM_009237]	ENSMUSG00000045179	20675	-4.28839	5.88011	-14.873	1.23867e-05	0.000216354	4.18959	DOWN
25962	A_52_P248604	Cdh5	NM_009868	ref|Mus musculus cadherin 5 (Cdh5), mRNA [NM_009868]	ENSMUSG00000031871	12562	4.617	7.98581	14.8728	1.23876e-05	0.000216354	4.18951	UP
20873	A_51_P222337	Rspo2	NM_172815	ref|Mus musculus R-spondin 2 homolog (Xenopus laevis) (Rspo2), mRNA [NM_172815]	ENSMUSG00000051920	239405	-4.64467	6.45584	-14.8629	1.2432e-05	0.000216777	4.1858	DOWN
2782	A_66_P100165	Serpini1	NM_009250	ref|Mus musculus serine (or cysteine) peptidase inhibitor, clade I, member 1 (Serpini1), mRNA [NM_009250]	ENSMUSG00000027834	20713	-2.71767	9.32328	-14.8574	1.24565e-05	0.000216777	4.18375	DOWN
6924	A_55_P1970905	Lin28b	NM_001031772	ref|Mus musculus lin-28 homolog B (C. elegans) (Lin28b), mRNA [NM_001031772]	ENSMUSG00000063804	380669	-2.95255	5.90532	-14.8574	1.24566e-05	0.000216777	4.18375	DOWN
33549	A_51_P136620	Olfr921	NM_146782	ref|Mus musculus olfactory receptor 921 (Olfr921), mRNA [NM_146782]	ENSMUSG00000049926	258778	-2.80602	5.33735	-14.8539	1.24722e-05	0.000216777	4.18244	DOWN
19752	A_55_P2021266	Hpse	NM_152803	ref|Mus musculus heparanase (Hpse), mRNA [NM_152803]	ENSMUSG00000035273	15442	2.29405	5.22923	14.8536	1.24734e-05	0.000216777	4.18234	UP
6389	A_55_P2101526	L1td1	NM_001081202	ref|Mus musculus LINE-1 type transposase domain containing 1 (L1td1), mRNA [NM_001081202]	ENSMUSG00000087166	381591	2.33817	6.43863	14.8521	1.24805e-05	0.000216777	4.18176	UP
22458	A_51_P256665	Pon3	NM_173006	ref|Mus musculus paraoxonase 3 (Pon3), mRNA [NM_173006]	ENSMUSG00000029759	269823	4.89533	9.64083	14.851	1.24854e-05	0.000216777	4.18135	UP
32460	A_55_P2061849	Cdh20	NM_011800	ref|Mus musculus cadherin 20 (Cdh20), mRNA [NM_011800]	ENSMUSG00000050840	23836	-3.30624	6.89304	-14.8463	1.25067e-05	0.000216965	4.17957	DOWN
14607	A_55_P2002849	Aifm3	NM_175178	ref|Mus musculus apoptosis-inducing factor, mitochondrion-associated 3 (Aifm3), nuclear gene encoding mitochondrial protein, mRNA [NM_175178]	ENSMUSG00000022763	72168	-5.40032	11.1327	-14.8281	1.2589e-05	0.000218041	4.17276	DOWN
5141	A_52_P196105	Ttyh3	NM_175274	ref|Mus musculus tweety homolog 3 (Drosophila) (Ttyh3), mRNA [NM_175274]	ENSMUSG00000036565	78339	-3.24463	10.3721	-14.8279	1.25899e-05	0.000218041	4.17268	DOWN
32744	A_55_P2146374	Nmnat1	NM_133435	ref|Mus musculus nicotinamide nucleotide adenylyltransferase 1 (Nmnat1), mRNA [NM_133435]	ENSMUSG00000028992	66454	2.37361	9.09208	14.8095	1.26737e-05	0.000219081	4.16578	UP
13987	A_55_P2012201	App	NM_001198823	ref|Mus musculus amyloid beta (A4) precursor protein (App), transcript variant 1, mRNA [NM_001198823]	ENSMUSG00000022892	11820	-2.56282	14.4571	-14.8085	1.26784e-05	0.000219081	4.1654	DOWN
12739	A_55_P2001688	Grid1	NM_008166	ref|Mus musculus glutamate receptor, ionotropic, delta 1 (Grid1), mRNA [NM_008166]	ENSMUSG00000041078	14803	-4.07064	6.03206	-14.8078	1.26817e-05	0.000219081	4.16513	DOWN
32824	A_55_P1982559	1700007K13Rik	NM_027040	ref|Mus musculus RIKEN cDNA 1700007K13 gene (1700007K13Rik), mRNA [NM_027040]	ENSMUSG00000026831	69327	-3.70475	5.79368	-14.8032	1.27026e-05	0.000219113	4.16342	DOWN
9878	A_51_P467224	Fbn1	NM_007993	ref|Mus musculus fibrillin 1 (Fbn1), mRNA [NM_007993]	ENSMUSG00000027204	14118	3.3905	6.76985	14.8007	1.2714e-05	0.000219113	4.16248	UP
10399	A_51_P210350	Slc17a8	NM_182959	ref|Mus musculus solute carrier family 17 (sodium-dependent inorganic phosphate cotransporter), member 8 (Slc17a8), mRNA [NM_182959]	ENSMUSG00000019935	216227	-2.3679	5.72191	-14.7973	1.27299e-05	0.000219113	4.16118	DOWN
3778	A_52_P24308	Uchl1	NM_011670	ref|Mus musculus ubiquitin carboxy-terminal hydrolase L1 (Uchl1), mRNA [NM_011670]	ENSMUSG00000029223	22223	-4.31397	11.9955	-14.7958	1.27366e-05	0.000219113	4.16063	DOWN
16799	A_55_P2039566	Arhgap23	NM_021493	ref|Mus musculus Rho GTPase activating protein 23 (Arhgap23), mRNA [NM_021493]	ENSMUSG00000049807	58996	-2.52602	12.7239	-14.7914	1.27571e-05	0.000219113	4.15896	DOWN
2857	A_55_P2033507	Ltbp4	ENSMUST00000165207	ens|latent transforming growth factor beta binding protein 4 [Source:MGI Symbol;Acc:MGI:1321395] [ENSMUST00000165207]	ENSMUSG00000040488	108075	2.72873	8.87665	14.7911	1.27586e-05	0.000219113	4.15884	UP
3626	A_55_P2302195	0610040F04Rik	AK039720	gb|Mus musculus adult male spinal cord cDNA, RIKEN full-length enriched library, clone:A330095A16 product:unclassifiable, full insert sequence. [AK039720]	ENSMUSG00000087341	75394	-2.88923	6.31689	-14.7897	1.27651e-05	0.000219113	4.15831	DOWN
13258	A_55_P2019054	Acacb	NM_133904	ref|Mus musculus acetyl-Coenzyme A carboxylase beta (Acacb), mRNA [NM_133904]	ENSMUSG00000042010	100705	5.85353	9.02724	14.7889	1.27685e-05	0.000219113	4.15804	UP
38727	A_55_P1991016	Basp1	NM_027395	ref|Mus musculus brain abundant, membrane attached signal protein 1 (Basp1), mRNA [NM_027395]	ENSMUSG00000045763	70350	-3.44206	9.53873	-14.782	1.28005e-05	0.000219479	4.15543	DOWN
33664	A_55_P1967010	Gprin1	NM_012014	ref|Mus musculus G protein-regulated inducer of neurite outgrowth 1 (Gprin1), mRNA [NM_012014]	ENSMUSG00000069227	26913	-4.86636	9.23891	-14.7782	1.28181e-05	0.000219598	4.154	DOWN
5912	A_55_P2075592	Clstn1	NM_023051	ref|Mus musculus calsyntenin 1 (Clstn1), mRNA [NM_023051]	ENSMUSG00000039953	65945	-3.38008	9.46497	-14.7609	1.28989e-05	0.0002208	4.14747	DOWN
18052	A_55_P2111770	Klhl13	NM_026167	ref|Mus musculus kelch-like 13 (Drosophila) (Klhl13), mRNA [NM_026167]	ENSMUSG00000036782	67455	-3.22793	11.161	-14.7568	1.2918e-05	0.000220945	4.14592	DOWN
16169	A_52_P546162	ENSMUST00000103355	ENSMUST00000103355	ens|immunoglobulin kappa variable 4-58 [Source:MGI Symbol;Acc:MGI:2685923] [ENSMUST00000103355]	ENSMUST00000103355	NA	2.79456	6.29202	14.7406	1.29944e-05	0.000222067	4.13978	UP
2394	A_51_P114616	Batf	NM_016767	ref|Mus musculus basic leucine zipper transcription factor, ATF-like (Batf), mRNA [NM_016767]	ENSMUSG00000034266	53314	2.93879	5.89169	14.7335	1.30277e-05	0.000222215	4.13712	UP
411	A_55_P1982533	Elovl4	NM_148941	ref|Mus musculus elongation of very long chain fatty acids (FEN1/Elo2, SUR4/Elo3, yeast)-like 4 (Elovl4), transcript variant 1, mRNA [NM_148941]	ENSMUSG00000032262	83603	-4.55898	8.27695	-14.7321	1.30343e-05	0.000222215	4.1366	DOWN
6157	A_52_P201800	Nanos1	NM_178421	ref|Mus musculus nanos homolog 1 (Drosophila) (Nanos1), mRNA [NM_178421]	ENSMUSG00000072437	332397	-2.54601	5.97462	-14.7319	1.30354e-05	0.000222215	4.13651	DOWN
15876	A_55_P2018422	6430628N08Rik	AK018292	gb|Mus musculus adult male olfactory brain cDNA, RIKEN full-length enriched library, clone:6430628N08 product:hypothetical protein, full insert sequence. [AK018292]	ENSMUSG00000034185	76237	-5.09995	7.13023	-14.7253	1.30669e-05	0.000222569	4.13399	DOWN
11635	A_52_P47781	Slitrk3	NM_198864	ref|Mus musculus SLIT and NTRK-like family, member 3 (Slitrk3), mRNA [NM_198864]	ENSMUSG00000048304	386750	-3.67015	6.60356	-14.6913	1.32295e-05	0.000225153	4.12112	DOWN
39350	A_51_P286496	Il2rb	NM_008368	ref|Mus musculus interleukin 2 receptor, beta chain (Il2rb), mRNA [NM_008368]	ENSMUSG00000068227	16185	3.51909	5.02863	14.6881	1.3245e-05	0.00022523	4.1199	UP
27476	A_51_P156158	Phlpp1	NM_133821	ref|Mus musculus PH domain and leucine rich repeat protein phosphatase 1 (Phlpp1), mRNA [NM_133821]	ENSMUSG00000044340	98432	-2.6447	9.51436	-14.668	1.33421e-05	0.000226566	4.11229	DOWN
20807	A_55_P2236228	ENSMUST00000149343	ENSMUST00000149343	ens|RIKEN cDNA 9430041J12 gene [Source:MGI Symbol;Acc:MGI:1924573] [ENSMUST00000149343]	ENSMUST00000149343	NA	-3.61621	6.55168	-14.6674	1.33455e-05	0.000226566	4.11202	DOWN
31167	A_55_P1986828	Nkpd1	NM_027116	ref|Mus musculus NTPase, KAP family P-loop domain containing 1 (Nkpd1), mRNA [NM_027116]	ENSMUSG00000060621	69547	-2.60873	6.58468	-14.6607	1.33782e-05	0.000226832	4.10947	DOWN
906	A_51_P114062	Ncs1	NM_019681	ref|Mus musculus neuronal calcium sensor 1 (Ncs1), mRNA [NM_019681]	ENSMUSG00000062661	14299	-5.51914	9.41828	-14.6596	1.33831e-05	0.000226832	4.10909	DOWN
37582	A_51_P454217	Nfkb2	NM_019408	ref|Mus musculus nuclear factor of kappa light polypeptide gene enhancer in B-cells 2, p49/p100 (Nfkb2), transcript variant 1, mRNA [NM_019408]	ENSMUSG00000025225	18034	2.43266	7.55414	14.6482	1.34391e-05	0.000227594	4.10474	UP
2198	A_55_P1982186	Sgsm1	NM_172718	ref|Mus musculus small G protein signaling modulator 1 (Sgsm1), transcript variant 1, mRNA [NM_172718]	ENSMUSG00000042216	52850	-2.48795	6.65867	-14.6406	1.34763e-05	0.000228017	4.10186	DOWN
2232	A_55_P1963463	Gabra3	NM_008067	ref|Mus musculus gamma-aminobutyric acid (GABA) A receptor, subunit alpha 3 (Gabra3), mRNA [NM_008067]	ENSMUSG00000031343	14396	-2.6107	8.1988	-14.6386	1.34862e-05	0.000228017	4.10109	DOWN
25169	A_55_P2134536	Kctd8	ENSMUST00000087231	ens|potassium channel tetramerisation domain containing 8 [Source:MGI Symbol;Acc:MGI:2443804] [ENSMUST00000087231]	ENSMUSG00000037653	243043	-2.57981	5.16833	-14.6349	1.35049e-05	0.000228146	4.09965	DOWN
21027	A_52_P220783	Tmem229b	NM_178745	ref|Mus musculus transmembrane protein 229B (Tmem229b), transcript variant 1, mRNA [NM_178745]	ENSMUSG00000046157	268567	-2.67247	12.3363	-14.6223	1.3567e-05	0.000229009	4.09486	DOWN
7657	A_55_P2019964	Lancl1	NM_001190985	ref|Mus musculus LanC (bacterial lantibiotic synthetase component C)-like 1 (Lancl1), transcript variant 1, mRNA [NM_001190985]	ENSMUSG00000026000	14768	-2.38272	10.4313	-14.6156	1.36003e-05	0.000229383	4.0923	DOWN
23533	A_55_P2110121	Spock3	NM_023689	ref|Mus musculus sparc/osteonectin, cwcv and kazal-like domains proteoglycan 3 (Spock3), mRNA [NM_023689]	ENSMUSG00000054162	72902	-2.70612	5.25582	-14.5971	1.36931e-05	0.00023076	4.08521	DOWN
27977	A_55_P2001123	ENSMUST00000106026	ENSMUST00000106026	ens|RIKEN cDNA 2210404O09 gene [Source:MGI Symbol;Acc:MGI:1917331] [ENSMUST00000106026]	ENSMUST00000106026	NA	-2.55283	6.36296	-14.5597	1.38822e-05	0.000233756	4.0709	DOWN
12332	A_55_P2054027	Chst5	NM_019950	ref|Mus musculus carbohydrate (N-acetylglucosamine 6-O) sulfotransferase 5 (Chst5), mRNA [NM_019950]	ENSMUSG00000031952	56773	-3.97974	6.01747	-14.5533	1.39151e-05	0.000233991	4.06844	DOWN
9806	A_51_P213030	Macrod1	NM_134147	ref|Mus musculus MACRO domain containing 1 (Macrod1), mRNA [NM_134147]	ENSMUSG00000036278	107227	3.21101	12.3161	14.551	1.39269e-05	0.000233991	4.06755	UP
12419	A_55_P2051914	Zfp568	NM_001167872	ref|Mus musculus zinc finger protein 568 (Zfp568), transcript variant 1, mRNA [NM_001167872]	ENSMUSG00000074221	243905	2.45824	6.95114	14.5503	1.39302e-05	0.000233991	4.0673	UP
21137	A_55_P1970309	Arhgap44	NM_175003	ref|Mus musculus Rho GTPase activating protein 44 (Arhgap44), transcript variant 2, mRNA [NM_175003]	ENSMUSG00000033389	216831	-4.45277	11.6836	-14.5467	1.39485e-05	0.000234108	4.06593	DOWN
6697	A_55_P1995297	Gm5124	NM_198633	ref|Mus musculus predicted pseudogene 5124 (Gm5124), mRNA [NM_198633]	ENSMUSG00000051537	331392	-3.28334	7.07396	-14.5436	1.39648e-05	0.000234192	4.06471	DOWN
11181	A_55_P2129311	2210016L21Rik	NM_028211	ref|Mus musculus RIKEN cDNA 2210016L21 gene (2210016L21Rik), mRNA [NM_028211]	ENSMUSG00000029559	72357	-2.64056	12.241	-14.5363	1.40022e-05	0.000234627	4.06192	DOWN
14911	A_52_P64356	Sparcl1	NM_010097	ref|Mus musculus SPARC-like 1 (Sparcl1), mRNA [NM_010097]	ENSMUSG00000029309	13602	-3.3073	16.4483	-14.533	1.4019e-05	0.000234718	4.06067	DOWN
4230	A_55_P2059015	Mapk8ip3	AF178637	gb|Mus musculus JNK interacting protein-3b (Jip3) mRNA, complete cds. [AF178637]	ENSMUSG00000024163	30957	-2.77082	11.4958	-14.5047	1.4166e-05	0.000236988	4.04977	DOWN
37699	A_52_P222096	4931428F04Rik	NM_028888	ref|Mus musculus RIKEN cDNA 4931428F04 gene (4931428F04Rik), transcript variant 1, mRNA [NM_028888]	ENSMUSG00000014837	74356	-2.8093	7.78677	-14.4973	1.4205e-05	0.000237445	4.0469	DOWN
31740	A_55_P2120244	Fcer1a	NM_010184	ref|Mus musculus Fc receptor, IgE, high affinity I, alpha polypeptide (Fcer1a), mRNA [NM_010184]	ENSMUSG00000005339	14125	2.27765	4.73974	14.4951	1.42163e-05	0.000237445	4.04607	UP
28849	A_52_P628915	Syt4	NM_009308	ref|Mus musculus synaptotagmin IV (Syt4), mRNA [NM_009308]	ENSMUSG00000024261	20983	-3.3484	8.9837	-14.4919	1.42334e-05	0.000237538	4.04482	DOWN
30380	A_51_P292073	Haghl	NM_026897	ref|Mus musculus hydroxyacylglutathione hydrolase-like (Haghl), mRNA [NM_026897]	ENSMUSG00000061046	68977	-3.19982	13.0675	-14.473	1.43331e-05	0.000239008	4.03753	DOWN
38416	A_55_P2011950	ENSMUST00000103552	ENSMUST00000103552	ens|immunoglobulin heavy variable 1-85 [Source:MGI Symbol;Acc:MGI:3645723] [ENSMUST00000103552]	ENSMUST00000103552	NA	4.30887	5.6517	14.4675	1.43624e-05	0.000239304	4.03539	UP
23331	A_55_P2137496	Cd79a	BC027633	gb|Mus musculus CD79A antigen (immunoglobulin-associated alpha), mRNA (cDNA clone MGC:41188 IMAGE:1332396), complete cds. [BC027633]	ENSMUSG00000003379	12518	3.75047	6.35036	14.4524	1.44429e-05	0.000240309	4.02955	UP
34717	A_51_P319022	Cxcr3	NM_009910	ref|Mus musculus chemokine (C-X-C motif) receptor 3 (Cxcr3), mRNA [NM_009910]	ENSMUSG00000050232	12766	4.01443	4.99205	14.4518	1.4446e-05	0.000240309	4.02932	UP
7829	A_55_P2151601	Samd9l	NM_010156	ref|Mus musculus sterile alpha motif domain containing 9-like (Samd9l), mRNA [NM_010156]	ENSMUSG00000047735	209086	2.59981	8.1537	14.447	1.44716e-05	0.000240541	4.02747	UP
29320	A_55_P2015994	Fgf9	NM_013518	ref|Mus musculus fibroblast growth factor 9 (Fgf9), mRNA [NM_013518]	ENSMUSG00000021974	14180	-4.37601	10.372	-14.4436	1.44899e-05	0.000240652	4.02615	DOWN
15948	A_51_P224311	Popdc2	NM_022318	ref|Mus musculus popeye domain containing 2 (Popdc2), transcript variant 2, mRNA [NM_022318]	ENSMUSG00000022803	64082	5.28679	7.55322	14.4382	1.4519e-05	0.00024094	4.02405	UP
35661	A_51_P416669	Krt1	NM_008473	ref|Mus musculus keratin 1 (Krt1), mRNA [NM_008473]	ENSMUSG00000046834	16678	-4.14146	6.41879	-14.4345	1.45388e-05	0.000241076	4.02262	DOWN
22366	A_55_P2036693	Cd40	NM_011611	ref|Mus musculus CD40 antigen (Cd40), transcript variant 1, mRNA [NM_011611]	ENSMUSG00000017652	21939	2.64533	5.9189	14.4283	1.45723e-05	0.000241388	4.02022	UP
12021	A_55_P2137611	Irgm2	NM_019440	ref|Mus musculus immunity-related GTPase family M member 2 (Irgm2), mRNA [NM_019440]	ENSMUSG00000069874	54396	2.63565	8.15973	14.4247	1.45915e-05	0.000241388	4.01884	UP
676	A_52_P184368	Ncam2	NM_010954	ref|Mus musculus neural cell adhesion molecule 2 (Ncam2), transcript variant 2, mRNA [NM_010954]	ENSMUSG00000022762	17968	-2.59914	5.51147	-14.4245	1.45927e-05	0.000241388	4.01876	DOWN
17542	A_52_P195018	Arap3	NM_139206	ref|Mus musculus ArfGAP with RhoGAP domain, ankyrin repeat and PH domain 3 (Arap3), transcript variant 1, mRNA [NM_139206]	ENSMUSG00000024451	106952	3.08231	7.58165	14.4159	1.46391e-05	0.000241961	4.01544	UP
3958	A_55_P2047962	Gjc2	NM_175452	ref|Mus musculus gap junction protein, gamma 2 (Gjc2), transcript variant 2, mRNA [NM_175452]	ENSMUSG00000043448	118454	-3.17177	9.32335	-14.4053	1.46968e-05	0.000242721	4.01132	DOWN
1474	A_55_P2105963	P2ry10	NM_172435	ref|Mus musculus purinergic receptor P2Y, G-protein coupled 10 (P2ry10), mRNA [NM_172435]	ENSMUSG00000050921	78826	3.02075	4.80878	14.4021	1.47143e-05	0.000242816	4.01008	UP
28410	A_51_P302358	Ltb	NM_008518	ref|Mus musculus lymphotoxin B (Ltb), mRNA [NM_008518]	ENSMUSG00000024399	16994	4.68792	8.38073	14.3981	1.47365e-05	0.000242986	4.0085	UP
6129	A_66_P128442	Rimbp3	NM_001033338	ref|Mus musculus RIMS binding protein 3 (Rimbp3), mRNA [NM_001033338]	ENSMUSG00000071636	239731	-2.341	5.07479	-14.396	1.47482e-05	0.000242986	4.00767	DOWN
13360	A_55_P1970105	Ltbp2	NM_013589	ref|Mus musculus latent transforming growth factor beta binding protein 2 (Ltbp2), mRNA [NM_013589]	ENSMUSG00000002020	16997	8.14463	7.91061	14.3905	1.47781e-05	0.000243068	4.00555	UP
20037	A_55_P2085142	Spp1	NM_001204233	ref|Mus musculus secreted phosphoprotein 1 (Spp1), transcript variant 5, mRNA [NM_001204233]	ENSMUSG00000029304	20750	-5.4314	8.65412	-14.3881	1.47912e-05	0.000243068	4.00463	DOWN
5138	A_66_P139196	Baz1a	NM_013815	ref|Mus musculus bromodomain adjacent to zinc finger domain 1A (Baz1a), mRNA [NM_013815]	ENSMUSG00000035021	217578	2.78449	5.55613	14.388	1.4792e-05	0.000243068	4.00457	UP
11086	A_51_P269078	Habp4	NM_019986	ref|Mus musculus hyaluronic acid binding protein 4 (Habp4), mRNA [NM_019986]	ENSMUSG00000021476	56541	-3.26337	11.3333	-14.3865	1.48003e-05	0.000243068	4.00398	DOWN
20186	A_55_P1984487	Adra2c	NM_007418	ref|Mus musculus adrenergic receptor, alpha 2c (Adra2c), mRNA [NM_007418]	ENSMUSG00000045318	11553	-2.90457	9.71609	-14.3823	1.48232e-05	0.000243251	4.00236	DOWN
26580	A_55_P2086664	Tspan33	NM_146173	ref|Mus musculus tetraspanin 33 (Tspan33), mRNA [NM_146173]	ENSMUSG00000001763	232670	-3.11508	10.8782	-14.3746	1.48658e-05	0.000243756	3.99936	DOWN
36970	A_55_P2038559	Gm9962	NR_033504	ref|Mus musculus predicted gene 9962 (Gm9962), non-coding RNA [NR_033504]	ENSMUSG00000055048	791383	-2.96262	4.80237	-14.3676	1.49046e-05	0.000244163	3.99663	DOWN
31944	A_55_P1967231	Stbd1	NM_175096	ref|Mus musculus starch binding domain 1 (Stbd1), mRNA [NM_175096]	ENSMUSG00000047963	52331	3.4384	8.23508	14.3658	1.49143e-05	0.000244163	3.99595	UP
19817	A_55_P2012799	Rtkn	NM_133641	ref|Mus musculus rhotekin (Rtkn), transcript variant 3, mRNA [NM_133641]	ENSMUSG00000034930	20166	-2.73701	13.3611	-14.3593	1.49504e-05	0.000244561	3.99342	DOWN
3589	A_55_P2084378	Mtmr7	NM_001040699	ref|Mus musculus myotubularin related protein 7 (Mtmr7), mRNA [NM_001040699]	ENSMUSG00000039431	54384	-4.04192	7.97521	-14.3517	1.49928e-05	0.000245039	3.99046	DOWN
10268	A_51_P352381	Dhrs4	NM_030686	ref|Mus musculus dehydrogenase/reductase (SDR family) member 4 (Dhrs4), transcript variant 2, mRNA [NM_030686]	ENSMUSG00000022210	28200	3.19229	8.91814	14.347	1.50191e-05	0.000245039	3.98862	UP
6462	A_55_P2131233	Ttc39a	ENSMUST00000106619	ens|tetratricopeptide repeat domain 39A [Source:MGI Symbol;Acc:MGI:2444350] [ENSMUST00000106619]	ENSMUSG00000028555	230603	-2.28052	5.68508	-14.3462	1.50239e-05	0.000245039	3.98828	DOWN
21057	A_52_P87843	Aldh1a3	NM_053080	ref|Mus musculus aldehyde dehydrogenase family 1, subfamily A3 (Aldh1a3), mRNA [NM_053080]	ENSMUSG00000015134	56847	2.56867	5.80803	14.3456	1.50271e-05	0.000245039	3.98806	UP
8637	A_55_P2160218	Nrl	NM_001136074	ref|Mus musculus neural retina leucine zipper gene (Nrl), transcript variant 2, mRNA [NM_001136074]	ENSMUSG00000040632	18185	-3.46175	6.18963	-14.3371	1.5075e-05	0.000245625	3.98473	DOWN
10029	A_55_P2073754	Adam23	NM_011780	ref|Mus musculus a disintegrin and metallopeptidase domain 23 (Adam23), transcript variant 2, mRNA [NM_011780]	ENSMUSG00000025964	23792	-2.67101	6.37583	-14.3334	1.50956e-05	0.000245713	3.9833	DOWN
37488	A_52_P197402	Tbc1d30	NM_029057	ref|Mus musculus TBC1 domain family, member 30 (Tbc1d30), mRNA [NM_029057]	ENSMUSG00000052302	74694	-4.7076	8.94144	-14.3319	1.51042e-05	0.000245713	3.98271	DOWN
13375	A_55_P2136817	Coro2b	NM_175484	ref|Mus musculus coronin, actin binding protein, 2B (Coro2b), mRNA [NM_175484]	ENSMUSG00000041729	235431	-2.67045	11.9322	-14.3247	1.51448e-05	0.00024618	3.97989	DOWN
38555	A_51_P167763	Kcnk13	NM_146037	ref|Mus musculus potassium channel, subfamily K, member 13 (Kcnk13), transcript variant 3, mRNA [NM_146037]	ENSMUSG00000045404	217826	-3.54682	8.91367	-14.3164	1.51921e-05	0.000246755	3.97663	DOWN
10242	A_55_P2149337	Wasf3	NM_145155	ref|Mus musculus WAS protein family, member 3 (Wasf3), mRNA [NM_145155]	ENSMUSG00000029636	245880	-2.38341	5.9961	-14.3136	1.52076e-05	0.000246812	3.97556	DOWN
8660	A_55_P2177463	B130024G19Rik	XR_035339	ref|PREDICTED: Mus musculus RIKEN cDNA B130024G19 gene (B130024G19Rik), miscRNA [XR_035339]	ENSMUSG00000100005	434198	2.55877	5.28386	14.3108	1.52235e-05	0.000246876	3.97447	UP
14670	A_55_P2082733	Cybb	NM_007807	ref|Mus musculus cytochrome b-245, beta polypeptide (Cybb), mRNA [NM_007807]	ENSMUSG00000015340	13058	3.29403	4.83159	14.2946	1.53158e-05	0.000247991	3.96813	UP
22374	A_51_P406157	Calcb	NM_054084	ref|Mus musculus calcitonin-related polypeptide, beta (Calcb), mRNA [NM_054084]	ENSMUSG00000030666	116903	-4.96873	7.21618	-14.2946	1.53163e-05	0.000247991	3.9681	DOWN
15176	A_51_P175945	Tmem74	NM_175502	ref|Mus musculus transmembrane protein 74 (Tmem74), mRNA [NM_175502]	ENSMUSG00000054409	239408	-2.88036	5.6804	-14.2849	1.53716e-05	0.000248692	3.96432	DOWN
34559	A_51_P145520	Sigirr	NM_023059	ref|Mus musculus single immunoglobulin and toll-interleukin 1 receptor (TIR) domain (Sigirr), mRNA [NM_023059]	ENSMUSG00000025494	24058	2.66489	7.21372	14.2707	1.54537e-05	0.000249461	3.95874	UP
24882	A_51_P226465	Mypop	NM_145579	ref|Mus musculus Myb-related transcription factor, partner of profilin (Mypop), mRNA [NM_145579]	ENSMUSG00000048481	232934	-2.60039	9.31566	-14.268	1.54692e-05	0.000249461	3.95769	DOWN
37083	A_51_P111962	Bean1	NM_001141922	ref|Mus musculus brain expressed, associated with Nedd4, 1 (Bean1), transcript variant 1, mRNA [NM_001141922]	ENSMUSG00000031872	65115	-3.06359	8.74295	-14.2655	1.54836e-05	0.000249461	3.95671	DOWN
31298	A_51_P125205	Aqp1	NM_007472	ref|Mus musculus aquaporin 1 (Aqp1), mRNA [NM_007472]	ENSMUSG00000004655	11826	7.65784	8.55022	14.2655	1.54839e-05	0.000249461	3.95669	UP
6511	A_51_P508156	Cryga	NM_007774	ref|Mus musculus crystallin, gamma A (Cryga), mRNA [NM_007774]	ENSMUSG00000044429	12964	-2.60573	5.99216	-14.265	1.54866e-05	0.000249461	3.95651	DOWN
20345	A_51_P499838	Bst1	NM_009763	ref|Mus musculus bone marrow stromal cell antigen 1 (Bst1), mRNA [NM_009763]	ENSMUSG00000029082	12182	2.25811	5.18879	14.2642	1.54916e-05	0.000249461	3.95617	UP
6504	A_55_P2350665	5033404E19Rik	AK017151	gb|Mus musculus 11 days pregnant adult female ovary and uterus cDNA, RIKEN full-length enriched library, clone:5033404E19 product:cortactin binding protein 2, full insert sequence. [AK017151]	ENSMUSG00000102185	114668	-2.49767	5.84296	-14.247	1.55915e-05	0.000250663	3.94943	DOWN
34173	A_55_P2056674	Lrrk1	NM_146191	ref|Mus musculus leucine-rich repeat kinase 1 (Lrrk1), mRNA [NM_146191]	ENSMUSG00000015133	233328	2.54282	6.9818	14.2455	1.56005e-05	0.000250663	3.94883	UP
15725	A_66_P102346	ENSMUST00000103321	ENSMUST00000103321	ens|predicted gene, 16634 [Source:MGI Symbol;Acc:MGI:4439558] [ENSMUST00000103321]	ENSMUST00000103321	NA	4.62621	4.77855	14.2442	1.56083e-05	0.000250663	3.94831	UP
7354	A_55_P2055487	Parp3	NM_145619	ref|Mus musculus poly (ADP-ribose) polymerase family, member 3 (Parp3), mRNA [NM_145619]	ENSMUSG00000023249	235587	3.66185	7.47743	14.243	1.56149e-05	0.000250663	3.94786	UP
22403	A_55_P1967835	Tmem198	AK082334	gb|Mus musculus 0 day neonate cerebellum cDNA, RIKEN full-length enriched library, clone:C230038N12 product:hypothetical protein, full insert sequence. [AK082334]	ENSMUSG00000051703	319998	-3.40465	9.42966	-14.2381	1.5644e-05	0.000250936	3.94591	DOWN
22531	A_55_P2094706	Sox17	NM_011441	ref|Mus musculus SRY-box containing gene 17 (Sox17), mRNA [NM_011441]	ENSMUSG00000025902	20671	2.83572	7.5822	14.2357	1.56579e-05	0.000250964	3.94498	UP
23271	A_55_P2305294	Ptpn21	NM_011877	ref|Mus musculus protein tyrosine phosphatase, non-receptor type 21 (Ptpn21), transcript variant 1, mRNA [NM_011877]	ENSMUSG00000021009	24000	2.58318	6.92617	14.2246	1.57236e-05	0.000251821	3.94059	UP
13649	A_51_P193000	Bbs4	NM_175325	ref|Mus musculus Bardet-Biedl syndrome 4 (human) (Bbs4), mRNA [NM_175325]	ENSMUSG00000025235	102774	-2.24782	11.0482	-14.2178	1.57637e-05	0.000252191	3.93791	DOWN
2399	A_51_P126337	Fgf12	NM_183064	ref|Mus musculus fibroblast growth factor 12 (Fgf12), transcript variant 1, mRNA [NM_183064]	ENSMUSG00000022523	14167	-6.29281	10.5794	-14.2165	1.57711e-05	0.000252191	3.93742	DOWN
13575	A_55_P2094925	Srgn	NM_011157	ref|Mus musculus serglycin (Srgn), mRNA [NM_011157]	ENSMUSG00000020077	19073	2.9146	9.92436	14.2129	1.57928e-05	0.000252343	3.93598	UP
6357	A_51_P392776	Eml6	NM_146016	ref|Mus musculus echinoderm microtubule associated protein like 6 (Eml6), mRNA [NM_146016]	ENSMUSG00000044072	237711	-2.32308	5.96748	-14.2074	1.58253e-05	0.000252667	3.93382	DOWN
5028	A_51_P224042	Ppil6	NM_028430	ref|Mus musculus peptidylprolyl isomerase (cyclophilin)-like 6 (Ppil6), mRNA [NM_028430]	ENSMUSG00000078451	73075	-2.50249	6.17613	-14.2007	1.58652e-05	0.000252986	3.93118	DOWN
27034	A_55_P2001274	ENSMUST00000103532	ENSMUST00000103532	ens|predicted gene 9235 [Source:MGI Symbol;Acc:MGI:3648544] [ENSMUST00000103532]	ENSMUST00000103532	NA	3.75889	4.68854	14.2	1.58698e-05	0.000252986	3.93087	UP
2330	A_66_P127519	Lrfn5	NM_178714	ref|Mus musculus leucine rich repeat and fibronectin type III domain containing 5 (Lrfn5), mRNA [NM_178714]	ENSMUSG00000035653	238205	-3.05376	5.56164	-14.1836	1.59678e-05	0.000254352	3.92441	DOWN
29117	A_55_P1973995	ENSMUST00000077710	ENSMUST00000077710	ens|predicted gene 6756 [Source:MGI Symbol;Acc:MGI:3647509] [ENSMUST00000077710]	ENSMUST00000077710	NA	-2.59121	12.6105	-14.1751	1.60193e-05	0.000254938	3.92104	DOWN
32068	A_52_P638459	Ccl5	NM_013653	ref|Mus musculus chemokine (C-C motif) ligand 5 (Ccl5), mRNA [NM_013653]	ENSMUSG00000035042	20304	4.99932	7.91017	14.1734	1.60293e-05	0.000254938	3.92038	UP
5684	A_55_P2173897	Pla2g2d	NM_011109	ref|Mus musculus phospholipase A2, group IID (Pla2g2d), mRNA [NM_011109]	ENSMUSG00000041202	18782	3.70911	6.2119	14.163	1.60927e-05	0.000255749	3.91624	UP
6936	A_52_P267391	Trim12a	NM_023835	ref|Mus musculus tripartite motif-containing 12A (Trim12a), mRNA [NM_023835]	ENSMUSG00000066258	76681	2.30338	7.37567	14.1608	1.6106e-05	0.000255764	3.91537	UP
18870	A_51_P473259	Dpyd	NM_170778	ref|Mus musculus dihydropyrimidine dehydrogenase (Dpyd), mRNA [NM_170778]	ENSMUSG00000033308	99586	2.67408	9.34917	14.1506	1.61678e-05	0.000256548	3.91135	UP
20841	A_66_P121965	1110032F04Rik	NM_001167996	ref|Mus musculus RIKEN cDNA 1110032F04 gene (1110032F04Rik), mRNA [NM_001167996]	ENSMUSG00000046999	68725	-4.32778	6.28301	-14.1465	1.61929e-05	0.000256749	3.90972	DOWN
16423	A_55_P2023902	Gabra4	NM_010251	ref|Mus musculus gamma-aminobutyric acid (GABA) A receptor, subunit alpha 4 (Gabra4), mRNA [NM_010251]	ENSMUSG00000029211	14397	-3.51933	6.40214	-14.14	1.62326e-05	0.000257031	3.90715	DOWN
18212	A_52_P232830	Ets1	NM_011808	ref|Mus musculus E26 avian leukemia oncogene 1, 5' domain (Ets1), transcript variant 1, mRNA [NM_011808]	ENSMUSG00000032035	23871	3.0798	7.03879	14.1395	1.62357e-05	0.000257031	3.90695	UP
9438	A_55_P1988010	Gm10406	NM_001164727	ref|Mus musculus predicted gene 10406 (Gm10406), mRNA [NM_001164727]	ENSMUSG00000093985	100038847	-3.06115	10.5524	-14.1375	1.62482e-05	0.000257033	3.90614	DOWN
7015	A_51_P319460	Osmr	NM_011019	ref|Mus musculus oncostatin M receptor (Osmr), mRNA [NM_011019]	ENSMUSG00000022146	18414	3.07828	8.23395	14.1299	1.62948e-05	0.000257572	3.90314	UP
30156	A_51_P183561	Csdc2	NM_145473	ref|Mus musculus cold shock domain containing C2, RNA binding (Csdc2), mRNA [NM_145473]	ENSMUSG00000042109	105859	-5.23299	10.2051	-14.1206	1.63524e-05	0.000258286	3.89942	DOWN
14889	A_51_P495242	Lat	NM_010689	ref|Mus musculus linker for activation of T cells (Lat), mRNA [NM_010689]	ENSMUSG00000030742	16797	3.92013	6.33823	14.1181	1.63678e-05	0.00025833	3.89844	UP
26365	A_51_P223546	Nmnat2	NM_175460	ref|Mus musculus nicotinamide nucleotide adenylyltransferase 2 (Nmnat2), mRNA [NM_175460]	ENSMUSG00000042751	226518	-2.95777	5.92361	-14.1097	1.64197e-05	0.000258952	3.89511	DOWN
11023	A_55_P2093994	Maged2	NM_030700	ref|Mus musculus melanoma antigen, family D, 2 (Maged2), transcript variant 1, mRNA [NM_030700]	ENSMUSG00000025268	80884	-2.39884	12.7017	-14.1062	1.64415e-05	0.000258978	3.89371	DOWN
525	A_55_P2055854	Ppara	NM_011144	ref|Mus musculus peroxisome proliferator activated receptor alpha (Ppara), transcript variant 1, mRNA [NM_011144]	ENSMUSG00000022383	19013	5.1467	9.17479	14.1055	1.64464e-05	0.000258978	3.8934	UP
21896	A_55_P2105140	Mrap2	NM_001177731	ref|Mus musculus melanocortin 2 receptor accessory protein 2 (Mrap2), transcript variant 1, mRNA [NM_001177731]	ENSMUSG00000042761	244958	-4.29826	7.82814	-14.0974	1.64964e-05	0.000259427	3.89021	DOWN
12888	A_55_P2074836	Mapk8ip1	NM_001202445	ref|Mus musculus mitogen-activated protein kinase 8 interacting protein 1 (Mapk8ip1), transcript variant 2, mRNA [NM_001202445]	ENSMUSG00000027223	19099	-4.1457	14.3574	-14.0969	1.65001e-05	0.000259427	3.88998	DOWN
22770	A_55_P1978028	Sez6	NM_021286	ref|Mus musculus seizure related gene 6 (Sez6), mRNA [NM_021286]	ENSMUSG00000000632	20370	-4.72888	7.6713	-14.0917	1.65321e-05	0.000259733	3.88794	DOWN
7695	A_55_P2145711	Tox3	NM_172913	ref|Mus musculus TOX high mobility group box family member 3 (Tox3), mRNA [NM_172913]	ENSMUSG00000043668	244579	-3.8421	6.25839	-14.075	1.66376e-05	0.000261192	3.88126	DOWN
38743	A_55_P1988531	Myh11	NM_001161775	ref|Mus musculus myosin, heavy polypeptide 11, smooth muscle (Myh11), transcript variant 2, mRNA [NM_001161775]	ENSMUSG00000018830	17880	5.19791	6.3065	14.0688	1.66764e-05	0.00026133	3.87881	UP
2395	A_55_P2098071	Trim25	NM_009546	ref|Mus musculus tripartite motif-containing 25 (Trim25), mRNA [NM_009546]	ENSMUSG00000000275	217069	2.55932	10.75	14.0668	1.66891e-05	0.00026133	3.87801	UP
33799	A_51_P245989	Ccr2	NM_009915	ref|Mus musculus chemokine (C-C motif) receptor 2 (Ccr2), mRNA [NM_009915]	ENSMUSG00000049103	12772	2.73347	4.69687	14.0658	1.66958e-05	0.00026133	3.87759	UP
30548	A_55_P1958210	Ephb1	NM_173447	ref|Mus musculus Eph receptor B1 (Ephb1), transcript variant 1, mRNA [NM_173447]	ENSMUSG00000032537	270190	-5.03328	9.30856	-14.0656	1.66971e-05	0.00026133	3.87751	DOWN
12187	A_51_P331328	Gpihbp1	NM_026730	ref|Mus musculus GPI-anchored HDL-binding protein 1 (Gpihbp1), mRNA [NM_026730]	ENSMUSG00000022579	68453	7.80269	8.91677	14.0587	1.67406e-05	0.000261615	3.87477	UP
6307	A_55_P2088223	Synpr	NM_001163032	ref|Mus musculus synaptoporin (Synpr), transcript variant 2, mRNA [NM_001163032]	ENSMUSG00000056296	72003	-4.18843	6.11464	-14.0587	1.67406e-05	0.000261615	3.87477	DOWN
5851	A_51_P480119	Prelid2	NM_029942	ref|Mus musculus PRELI domain containing 2 (Prelid2), mRNA [NM_029942]	ENSMUSG00000056671	77619	2.27991	6.08198	14.0535	1.67739e-05	0.000261716	3.87268	UP
34344	A_51_P394814	Svep1	NM_022814	ref|Mus musculus sushi, von Willebrand factor type A, EGF and pentraxin domain containing 1 (Svep1), mRNA [NM_022814]	ENSMUSG00000028369	64817	4.71629	7.58222	14.0523	1.67817e-05	0.000261716	3.87219	UP
23367	A_52_P578581	Igsf11	NM_170599	ref|Mus musculus immunoglobulin superfamily, member 11 (Igsf11), mRNA [NM_170599]	ENSMUSG00000022790	207683	-3.26436	6.52948	-14.0517	1.67851e-05	0.000261716	3.87198	DOWN
22329	A_55_P2402756	A330049N07Rik	AK039487	gb|Mus musculus adult male spinal cord cDNA, RIKEN full-length enriched library, clone:A330049N07 product:unclassifiable, full insert sequence. [AK039487]	ENSMUSG00000111994	327768	-4.84538	6.17143	-14.0483	1.6807e-05	0.000261858	3.87061	DOWN
33468	A_51_P185247	Gdf10	NM_145741	ref|Mus musculus growth differentiation factor 10 (Gdf10), mRNA [NM_145741]	ENSMUSG00000021943	14560	2.40503	8.12081	14.0464	1.68196e-05	0.000261858	3.86982	UP
38252	A_55_P1994309	Ptgir	NM_008967	ref|Mus musculus prostaglandin I receptor (IP) (Ptgir), mRNA [NM_008967]	ENSMUSG00000043017	19222	3.12406	4.97111	14.0353	1.68906e-05	0.000262765	3.86539	UP
20660	A_55_P2057741	1500015L24Rik	AK005254	gb|Mus musculus adult male cerebellum cDNA, RIKEN full-length enriched library, clone:1500015L24 product:Hypothetical D111/G-patch domain containing protein, full insert sequence. [AK005254]	ENSMUSG00000094732	68994	-2.90869	5.22838	-14.0228	1.69711e-05	0.000263755	3.86039	DOWN
16814	A_51_P462918	Ehhadh	NM_023737	ref|Mus musculus enoyl-Coenzyme A, hydratase/3-hydroxyacyl Coenzyme A dehydrogenase (Ehhadh), mRNA [NM_023737]	ENSMUSG00000022853	74147	3.81472	8.65998	14.0206	1.69853e-05	0.000263755	3.85951	UP
11137	A_52_P229052	Tmeff2	NM_019790	ref|Mus musculus transmembrane protein with EGF-like and two follistatin-like domains 2 (Tmeff2), mRNA [NM_019790]	ENSMUSG00000026109	56363	-2.66623	8.81547	-14.0186	1.69982e-05	0.000263755	3.85871	DOWN
3564	A_51_P450469	Pnoc	NM_010932	ref|Mus musculus prepronociceptin (Pnoc), transcript variant 1, mRNA [NM_010932]	ENSMUSG00000045731	18155	-6.8309	8.15068	-14.0159	1.70159e-05	0.000263755	3.85761	DOWN
12562	A_66_P105046	Il18	NM_008360	ref|Mus musculus interleukin 18 (Il18), mRNA [NM_008360]	ENSMUSG00000039217	16173	-3.27172	9.60863	-14.0155	1.70181e-05	0.000263755	3.85748	DOWN
5931	A_51_P182131	5330417C22Rik	NM_001033304	ref|Mus musculus RIKEN cDNA 5330417C22 gene (5330417C22Rik), mRNA [NM_001033304]	ENSMUSG00000040412	229722	-2.34313	7.04171	-14.0125	1.70381e-05	0.000263867	3.85624	DOWN
34410	A_52_P268713	Kcnh1	NM_010600	ref|Mus musculus potassium voltage-gated channel, subfamily H (eag-related), member 1 (Kcnh1), transcript variant 1, mRNA [NM_010600]	ENSMUSG00000058248	16510	-2.80373	4.96213	-14.0028	1.71009e-05	0.00026464	3.85237	DOWN
20481	A_51_P162083	Elfn2	NM_183141	ref|Mus musculus leucine rich repeat and fibronectin type III, extracellular 2 (Elfn2), mRNA [NM_183141]	ENSMUSG00000043460	207393	-4.6102	6.35264	-14.0009	1.71136e-05	0.00026464	3.85159	DOWN
6404	A_55_P2106280	Gm10684	NR_033547	ref|Mus musculus predicted gene 10684 (Gm10684), non-coding RNA [NR_033547]	ENSMUSG00000074385	100038468	-3.13235	6.05367	-13.9918	1.71731e-05	0.000265326	3.84794	DOWN
18095	A_55_P2019422	Htr1f	NM_008310	ref|Mus musculus 5-hydroxytryptamine (serotonin) receptor 1F (Htr1f), mRNA [NM_008310]	ENSMUSG00000050783	15557	-2.16163	4.95455	-13.9901	1.71837e-05	0.000265326	3.84729	DOWN
1902	A_55_P2084611	B4galt6	NM_019737	ref|Mus musculus UDP-Gal:betaGlcNAc beta 1,4-galactosyltransferase, polypeptide 6 (B4galt6), mRNA [NM_019737]	ENSMUSG00000056124	56386	-3.55678	9.04102	-13.9841	1.72234e-05	0.00026574	3.84486	DOWN
17402	A_51_P138895	Ccdc102a	NM_001033533	ref|Mus musculus coiled-coil domain containing 102A (Ccdc102a), mRNA [NM_001033533]	ENSMUSG00000063605	234582	2.22807	8.50681	13.97	1.73165e-05	0.000266977	3.83919	UP
12475	A_55_P2063376	Add2	NM_013458	ref|Mus musculus adducin 2 (beta) (Add2), mRNA [NM_013458]	ENSMUSG00000030000	11519	-3.30326	7.10248	-13.9518	1.74378e-05	0.000268647	3.83184	DOWN
12325	A_55_P1974827	Pde1b	NM_008800	ref|Mus musculus phosphodiesterase 1B, Ca2+-calmodulin dependent (Pde1b), mRNA [NM_008800]	ENSMUSG00000022489	18574	-3.89667	12.5563	-13.9436	1.74921e-05	0.000269159	3.82856	DOWN
16220	A_52_P118310	Chn1	NM_175752	ref|Mus musculus chimerin (chimaerin) 1 (Chn1), transcript variant 1, mRNA [NM_175752]	ENSMUSG00000056486	108699	-3.68439	8.96233	-13.9429	1.74972e-05	0.000269159	3.82826	DOWN
39304	A_55_P2058403	Mast3	NM_199308	ref|Mus musculus microtubule associated serine/threonine kinase 3 (Mast3), mRNA [NM_199308]	ENSMUSG00000031833	546071	-2.54804	7.43379	-13.9382	1.75284e-05	0.000269439	3.82638	DOWN
13132	A_52_P518997	Epha2	NM_010139	ref|Mus musculus Eph receptor A2 (Epha2), mRNA [NM_010139]	ENSMUSG00000006445	13836	2.76318	6.36707	13.9344	1.75541e-05	0.000269633	3.82484	UP
30483	A_51_P245564	Phyhipl	NM_178621	ref|Mus musculus phytanoyl-CoA hydroxylase interacting protein-like (Phyhipl), transcript variant 1, mRNA [NM_178621]	ENSMUSG00000037747	70911	-2.64029	5.66311	-13.9315	1.75738e-05	0.000269735	3.82365	DOWN
27371	A_55_P2283310	5830428M24Rik	NR_038060	ref|Mus musculus RIKEN cDNA 5830428M24 gene (5830428M24Rik), transcript variant 1, non-coding RNA [NR_038060]	ENSMUSG00000113035	76062	3.17454	4.53844	13.9293	1.75887e-05	0.000269763	3.82277	UP
16870	A_55_P2108903	ENSMUST00000033479	ENSMUST00000033479	ens|zinc finger and BTB domain containing 20 [Source:MGI Symbol;Acc:MGI:1929213] [ENSMUST00000033479]	ENSMUST00000033479	NA	2.55172	9.11956	13.9099	1.77202e-05	0.000271578	3.81492	UP
17374	A_55_P2130970	Parp10	NM_001163576	ref|Mus musculus poly (ADP-ribose) polymerase family, member 10 (Parp10), transcript variant 2, mRNA [NM_001163576]	ENSMUSG00000063268	671535	2.31346	7.26886	13.9006	1.7783e-05	0.000272161	3.81119	UP
2538	A_55_P2060243	Itgbl1	NM_145467	ref|Mus musculus integrin, beta-like 1 (Itgbl1), mRNA [NM_145467]	ENSMUSG00000032925	223272	2.74926	4.85669	13.8959	1.78155e-05	0.000272161	3.80926	UP
5933	A_55_P1959303	Rbm47	NM_178446	ref|Mus musculus RNA binding motif protein 47 (Rbm47), transcript variant 1, mRNA [NM_178446]	ENSMUSG00000070780	245945	4.32632	6.02885	13.8956	1.78178e-05	0.000272161	3.80913	UP
24959	A_55_P2012899	Vsig4	NM_177789	ref|Mus musculus V-set and immunoglobulin domain containing 4 (Vsig4), mRNA [NM_177789]	ENSMUSG00000044206	278180	4.18691	5.29869	13.8944	1.7826e-05	0.000272161	3.80865	UP
978	A_55_P2135980	Ms4a4c	NM_029499	ref|Mus musculus membrane-spanning 4-domains, subfamily A, member 4C (Ms4a4c), mRNA [NM_029499]	ENSMUSG00000024675	64380	3.50767	7.41566	13.8938	1.78298e-05	0.000272161	3.80842	UP
29002	A_52_P282741	Sdc3	NM_011520	ref|Mus musculus syndecan 3 (Sdc3), mRNA [NM_011520]	ENSMUSG00000025743	20970	-2.37141	10.816	-13.8925	1.7839e-05	0.000272161	3.80788	DOWN
23170	A_66_P106611	Gna14	NM_008137	ref|Mus musculus guanine nucleotide binding protein, alpha 14 (Gna14), mRNA [NM_008137]	ENSMUSG00000024697	14675	-3.12361	7.66494	-13.8898	1.78573e-05	0.000272161	3.8068	DOWN
134	A_52_P49014	Shh	NM_009170	ref|Mus musculus sonic hedgehog (Shh), mRNA [NM_009170]	ENSMUSG00000002633	20423	-2.73838	4.76886	-13.8889	1.78637e-05	0.000272161	3.80642	DOWN
36749	A_52_P8324	Tmem178	NM_026516	ref|Mus musculus transmembrane protein 178 (Tmem178), mRNA [NM_026516]	ENSMUSG00000024245	68027	-3.39022	8.20422	-13.8711	1.79859e-05	0.000273821	3.79923	DOWN
10203	A_55_P2077027	Rhpn1	NM_001163465	ref|Mus musculus rhophilin, Rho GTPase binding protein 1 (Rhpn1), transcript variant 1, mRNA [NM_001163465]	ENSMUSG00000022580	14787	-2.52271	5.78095	-13.8627	1.80447e-05	0.000274514	3.79579	DOWN
17376	A_55_P2037982	Agap1	NM_178119	ref|Mus musculus ArfGAP with GTPase domain, ankyrin repeat and PH domain 1 (Agap1), transcript variant 1, mRNA [NM_178119]	ENSMUSG00000055013	347722	-2.56996	11.8873	-13.8592	1.80689e-05	0.00027468	3.79437	DOWN
18585	A_66_P130654	Abcg4	NM_138955	ref|Mus musculus ATP-binding cassette, sub-family G (WHITE), member 4 (Abcg4), mRNA [NM_138955]	ENSMUSG00000032131	192663	-3.58165	10.4945	-13.8523	1.81167e-05	0.000275203	3.79159	DOWN
19907	A_55_P2111439	Gpsm1	NM_001199147	ref|Mus musculus G-protein signalling modulator 1 (AGS3-like, C. elegans) (Gpsm1), transcript variant 3, mRNA [NM_001199147]	ENSMUSG00000026930	67839	-2.58526	7.53026	-13.8386	1.8213e-05	0.000276463	3.786	DOWN
1010	A_51_P401987	Tmem37	NM_019432	ref|Mus musculus transmembrane protein 37 (Tmem37), mRNA [NM_019432]	ENSMUSG00000050777	170706	4.8898	10.0667	13.8326	1.8255e-05	0.000276896	3.78357	UP
10469	A_51_P355753	Hic1	NM_010430	ref|Mus musculus hypermethylated in cancer 1 (Hic1), transcript variant 1, mRNA [NM_010430]	ENSMUSG00000043099	15248	2.47609	6.467	13.8266	1.82972e-05	0.000277332	3.78114	UP
13419	A_65_P18935	Grin1	NM_001177656	ref|Mus musculus glutamate receptor, ionotropic, NMDA1 (zeta 1) (Grin1), transcript variant 2, mRNA [NM_001177656]	ENSMUSG00000026959	14810	-4.09556	7.36738	-13.8126	1.83964e-05	0.000278632	3.77543	DOWN
16080	A_55_P1994630	Dpp6	AK047025	gb|Mus musculus 10 days neonate cerebellum cDNA, RIKEN full-length enriched library, clone:B930011P16 product:hypothetical protein, full insert sequence. [AK047025]	ENSMUSG00000061576	13483	-3.30565	8.61428	-13.807	1.84363e-05	0.000278912	3.77315	DOWN
19568	A_66_P110251	Tmem91	NM_177102	ref|Mus musculus transmembrane protein 91 (Tmem91), mRNA [NM_177102]	ENSMUSG00000061702	320208	-5.02498	10.1128	-13.8062	1.84419e-05	0.000278912	3.77282	DOWN
15167	A_51_P222993	Pnmal1	NM_001007569	ref|Mus musculus PNMA-like 1 (Pnmal1), mRNA [NM_001007569]	ENSMUSG00000041141	71691	-4.33445	6.82308	-13.7993	1.84919e-05	0.000279249	3.76997	DOWN
14566	A_55_P2029558	Adrb2	NM_007420	ref|Mus musculus adrenergic receptor, beta 2 (Adrb2), mRNA [NM_007420]	ENSMUSG00000045730	11555	3.23925	5.70862	13.7992	1.84923e-05	0.000279249	3.76995	UP
35504	A_55_P2019719	Oas2	NM_145227	ref|Mus musculus 2'-5' oligoadenylate synthetase 2 (Oas2), mRNA [NM_145227]	ENSMUSG00000032690	246728	3.97695	6.17726	13.7953	1.852e-05	0.000279249	3.76836	UP
19830	A_51_P446469	Dok2	NM_010071	ref|Mus musculus docking protein 2 (Dok2), mRNA [NM_010071]	ENSMUSG00000022102	13449	3.62304	7.84136	13.7947	1.85241e-05	0.000279249	3.76813	UP
28977	A_66_P133213	Slc35f1	NM_178675	ref|Mus musculus solute carrier family 35, member F1 (Slc35f1), mRNA [NM_178675]	ENSMUSG00000038602	215085	-2.23783	7.14114	-13.7937	1.85318e-05	0.000279249	3.76769	DOWN
10334	A_51_P389684	Tmem47	NM_138751	ref|Mus musculus transmembrane protein 47 (Tmem47), transcript variant 2, mRNA [NM_138751]	ENSMUSG00000025666	192216	-2.61488	6.85918	-13.7912	1.85492e-05	0.000279307	3.7667	DOWN
11166	A_55_P1989023	1700017N19Rik	NM_001081246	ref|Mus musculus RIKEN cDNA 1700017N19 gene (1700017N19Rik), mRNA [NM_001081246]	ENSMUSG00000056912	66605	-2.74184	5.00446	-13.7892	1.85637e-05	0.000279322	3.76588	DOWN
1060	A_51_P262489	Sst	NM_009215	ref|Mus musculus somatostatin (Sst), mRNA [NM_009215]	ENSMUSG00000004366	20604	-7.42892	10.8782	-13.7865	1.85833e-05	0.000279413	3.76476	DOWN
33995	A_55_P1969002	Tbx3	NM_011535	ref|Mus musculus T-box 3 (Tbx3), transcript variant 1, mRNA [NM_011535]	ENSMUSG00000018604	21386	3.55197	8.39548	13.7806	1.86257e-05	0.000279517	3.76236	UP
1938	A_55_P1972948	Celf5	NM_176954	ref|Mus musculus CUGBP, Elav-like family member 5 (Celf5), mRNA [NM_176954]	ENSMUSG00000034818	319586	-2.6248	6.23107	-13.7801	1.86294e-05	0.000279517	3.76215	DOWN
7710	A_52_P352735	Ccdc153	NM_001081369	ref|Mus musculus coiled-coil domain containing 153 (Ccdc153), mRNA [NM_001081369]	ENSMUSG00000070306	270150	-5.97272	7.89477	-13.7799	1.86309e-05	0.000279517	3.76207	DOWN
3173	A_66_P110425	Kif6	NM_177052	ref|Mus musculus kinesin family member 6 (Kif6), mRNA [NM_177052]	ENSMUSG00000023999	319991	-2.79269	6.51847	-13.7775	1.86486e-05	0.000279579	3.76107	DOWN
21006	A_52_P354390	Snrpn	NM_013670	ref|Mus musculus small nuclear ribonucleoprotein N (Snrpn), transcript variant 1, mRNA [NM_013670]	ENSMUSG00000102252	20646	-4.16375	10.8751	-13.7718	1.86897e-05	0.000279993	3.75874	DOWN
39243	A_55_P2091191	Slc28a2	NM_172980	ref|Mus musculus solute carrier family 28 (sodium-coupled nucleoside transporter), member 2 (Slc28a2), mRNA [NM_172980]	ENSMUSG00000027219	269346	5.957	5.63037	13.7646	1.87415e-05	0.000280565	3.75582	UP
5350	A_51_P508959	Prr15	NM_030024	ref|Mus musculus proline rich 15 (Prr15), mRNA [NM_030024]	ENSMUSG00000045725	78004	2.36092	6.68662	13.7584	1.87872e-05	0.000281045	3.75325	UP
8095	A_55_P1975370	Apoc1	NM_007469	ref|Mus musculus apolipoprotein C-I (Apoc1), transcript variant 1, mRNA [NM_007469]	ENSMUSG00000040564	11812	5.35993	12.4518	13.756	1.88042e-05	0.000281057	3.75229	UP
30252	A_55_P2030299	ENSMUST00000103469	ENSMUST00000103469	ens|immunoglobulin heavy variable V14-3 [Source:MGI Symbol;Acc:MGI:4439764] [ENSMUST00000103469]	ENSMUST00000103469	NA	5.15086	6.10645	13.7506	1.8844e-05	0.000281057	3.75006	UP
3539	A_55_P2082529	Sav1	NM_022028	ref|Mus musculus salvador homolog 1 (Drosophila) (Sav1), mRNA [NM_022028]	ENSMUSG00000021067	64010	2.8146	9.63192	13.7499	1.88491e-05	0.000281057	3.74977	UP
13726	A_51_P136294	Ms4a4b	NM_021718	ref|Mus musculus membrane-spanning 4-domains, subfamily A, member 4B (Ms4a4b), mRNA [NM_021718]	ENSMUSG00000056290	60361	5.0046	5.97178	13.7493	1.88534e-05	0.000281057	3.74953	UP
31991	A_55_P2013913	Cntn3	NM_008779	ref|Mus musculus contactin 3 (Cntn3), mRNA [NM_008779]	ENSMUSG00000030075	18488	-3.12086	7.25119	-13.7489	1.8856e-05	0.000281057	3.74938	DOWN
6591	A_55_P2107447	Rab37	NM_001163753	ref|Mus musculus RAB37, member of RAS oncogene family (Rab37), transcript variant 2, mRNA [NM_001163753]	ENSMUSG00000020732	58222	-4.8526	10.7919	-13.7416	1.89094e-05	0.00028148	3.7464	DOWN
24308	A_51_P347859	Irx6	NM_022428	ref|Mus musculus Iroquois related homeobox 6 (Drosophila) (Irx6), mRNA [NM_022428]	ENSMUSG00000031738	64379	-2.97049	5.71129	-13.7404	1.89184e-05	0.00028148	3.74589	DOWN
20331	A_51_P189361	Osgin1	NM_027950	ref|Mus musculus oxidative stress induced growth inhibitor 1 (Osgin1), mRNA [NM_027950]	ENSMUSG00000074063	71839	4.27393	7.81406	13.7395	1.89253e-05	0.00028148	3.74551	UP
19786	A_55_P2037478	Kifap3	NM_010629	ref|Mus musculus kinesin-associated protein 3 (Kifap3), mRNA [NM_010629]	ENSMUSG00000026585	16579	-2.21963	12.4718	-13.7359	1.89518e-05	0.000281501	3.74403	DOWN
21186	A_55_P2257341	2410004I01Rik	NR_037963	ref|Mus musculus RIKEN cDNA 2410004I01 gene (2410004I01Rik), non-coding RNA [NR_037963]	ENSMUSG00000085338	69739	-3.17998	6.01636	-13.7328	1.89748e-05	0.000281501	3.74275	DOWN
25650	A_55_P2078381	Gm3264	NM_001242945	ref|Mus musculus predicted gene 3264 (Gm3264), mRNA [NM_001242945]	ENSMUSG00000094132	100041306	-2.88531	6.68547	-13.732	1.89801e-05	0.000281501	3.74246	DOWN
9852	A_55_P2006950	Usp8	NM_019729	ref|Mus musculus ubiquitin specific peptidase 8 (Usp8), mRNA [NM_019729]	ENSMUSG00000027363	84092	-3.72228	10.25	-13.7311	1.89873e-05	0.000281501	3.74205	DOWN
30565	A_55_P2022890	Slc12a8	NM_134251	ref|Mus musculus solute carrier family 12 (potassium/chloride transporters), member 8 (Slc12a8), transcript variant 1, mRNA [NM_134251]	ENSMUSG00000035506	171286	-2.62703	6.97209	-13.73	1.89949e-05	0.000281501	3.74163	DOWN
4921	A_51_P130095	Fcgr2b	NM_001077189	ref|Mus musculus Fc receptor, IgG, low affinity IIb (Fcgr2b), transcript variant 1, mRNA [NM_001077189]	ENSMUSG00000026656	14130	2.6413	6.6774	13.727	1.90171e-05	0.000281628	3.7404	UP
16669	A_51_P461319	Gatm	NM_025961	ref|Mus musculus glycine amidinotransferase (L-arginine:glycine amidinotransferase) (Gatm), nuclear gene encoding mitochondrial protein, mRNA [NM_025961]	ENSMUSG00000027199	67092	-4.54039	9.88737	-13.7227	1.90489e-05	0.000281775	3.73863	DOWN
5959	A_55_P2069592	Pitpnm3	NM_001024927	ref|Mus musculus PITPNM family member 3 (Pitpnm3), transcript variant 1, mRNA [NM_001024927]	ENSMUSG00000040543	327958	-2.8868	8.0458	-13.7201	1.90683e-05	0.000281775	3.73756	DOWN
28988	A_51_P199135	Cd83	NM_009856	ref|Mus musculus CD83 antigen (Cd83), mRNA [NM_009856]	ENSMUSG00000015396	12522	-3.54121	11.9323	-13.7193	1.90745e-05	0.000281775	3.73721	DOWN
1681	A_65_P20799	Abi2	NM_001198571	ref|Mus musculus abl-interactor 2 (Abi2), transcript variant 2, mRNA [NM_001198571]	ENSMUSG00000026782	329165	-2.30585	8.60753	-13.7183	1.90817e-05	0.000281775	3.73682	DOWN
37162	A_51_P493649	Sult1e1	NM_023135	ref|Mus musculus sulfotransferase family 1E, member 1 (Sult1e1), mRNA [NM_023135]	ENSMUSG00000029272	20860	4.32863	5.26365	13.712	1.91285e-05	0.000282265	3.73423	UP
23625	A_51_P291417	Thbd	NM_009378	ref|Mus musculus thrombomodulin (Thbd), mRNA [NM_009378]	ENSMUSG00000074743	21824	4.0933	8.75024	13.7012	1.9209e-05	0.000283175	3.72979	UP
13704	A_55_P1977850	Sall1	NM_021390	ref|Mus musculus sal-like 1 (Drosophila) (Sall1), mRNA [NM_021390]	ENSMUSG00000031665	58198	-4.3427	6.13024	-13.6994	1.92227e-05	0.000283175	3.72904	DOWN
617	A_51_P268843	Rasip1	NM_028544	ref|Mus musculus Ras interacting protein 1 (Rasip1), mRNA [NM_028544]	ENSMUSG00000044562	69903	2.80959	8.47441	13.6982	1.92313e-05	0.000283175	3.72856	UP
30961	A_51_P383755	ENSMUST00000032900	ENSMUST00000032900	ens|RIKEN cDNA 1110006G14 gene [Source:MGI Symbol;Acc:MGI:1915719] [ENSMUST00000032900]	ENSMUST00000032900	NA	4.80867	6.22299	13.6945	1.92596e-05	0.000283389	3.72701	UP
9329	A_55_P2094729	Sox10	NM_011437	ref|Mus musculus SRY-box containing gene 10 (Sox10), mRNA [NM_011437]	ENSMUSG00000033006	20665	-4.06943	10.9657	-13.6873	1.93132e-05	0.000283828	3.72407	DOWN
26575	A_51_P117794	Bik	NM_007546	ref|Mus musculus BCL2-interacting killer (Bik), mRNA [NM_007546]	ENSMUSG00000016758	12124	2.23773	4.94402	13.6869	1.93169e-05	0.000283828	3.72387	UP
98	A_51_P375771	Ptchd1	NM_001093750	ref|Mus musculus patched domain containing 1 (Ptchd1), mRNA [NM_001093750]	ENSMUSG00000041552	211612	-2.40623	6.0599	-13.6774	1.9388e-05	0.000284669	3.71999	DOWN
7239	A_55_P1980746	Dram2	NM_026013	ref|Mus musculus VDNA-damage regulated autophagy modulator 2 (Dram2), transcript variant 2, mRNA [NM_026013]	ENSMUSG00000027900	67171	2.29853	9.74215	13.6698	1.94462e-05	0.00028508	3.71682	UP
2133	A_51_P109295	Pcdhb3	NM_053128	ref|Mus musculus protocadherin beta 3 (Pcdhb3), mRNA [NM_053128]	ENSMUSG00000045498	93874	-3.62322	6.25836	-13.6682	1.94579e-05	0.00028508	3.71619	DOWN
11429	A_55_P2019577	1500011B03Rik	NR_027818	ref|Mus musculus RIKEN cDNA 1500011B03 gene (1500011B03Rik), transcript variant 2, non-coding RNA [NR_027818]	ENSMUSG00000072694	66236	-3.50778	9.91622	-13.6681	1.94588e-05	0.00028508	3.71614	DOWN
30206	A_55_P2004007	ENSMUST00000037976	ENSMUST00000037976	ens|predicted gene 4955 [Source:MGI Symbol;Acc:MGI:3646410] [ENSMUST00000037976]	ENSMUST00000037976	NA	2.81907	4.93759	13.665	1.94823e-05	0.00028508	3.71486	UP
14527	A_51_P488180	Lrrtm3	NM_178678	ref|Mus musculus leucine rich repeat transmembrane neuronal 3 (Lrrtm3), mRNA [NM_178678]	ENSMUSG00000042846	216028	-4.86364	6.9854	-13.6647	1.94849e-05	0.00028508	3.71472	DOWN
564	A_55_P2086245	Kcnq2	NM_001006676	ref|Mus musculus potassium voltage-gated channel, subfamily Q, member 2 (Kcnq2), transcript variant 8, mRNA [NM_001006676]	ENSMUSG00000016346	16536	-2.10246	5.98236	-13.656	1.95507e-05	0.000285839	3.71115	DOWN
19667	A_51_P390967	Slc43a3	NM_021398	ref|Mus musculus solute carrier family 43, member 3 (Slc43a3), mRNA [NM_021398]	ENSMUSG00000027074	58207	6.67207	8.82301	13.6507	1.95914e-05	0.000286203	3.70895	UP
18386	A_66_P113245	Mfng	NM_008595	ref|Mus musculus MFNG O-fucosylpeptide 3-beta-N-acetylglucosaminyltransferase (Mfng), mRNA [NM_008595]	ENSMUSG00000018169	17305	2.8792	9.75471	13.6492	1.96033e-05	0.000286203	3.70831	UP
9326	A_52_P250555	Dynll1	NM_019682	ref|Mus musculus dynein light chain LC8-type 1 (Dynll1), mRNA [NM_019682]	ENSMUSG00000009013	56455	-2.41303	7.40389	-13.6448	1.96366e-05	0.000286395	3.70652	DOWN
16832	A_55_P1953851	Stk39	NM_016866	ref|Mus musculus serine/threonine kinase 39, STE20/SPS1 homolog (yeast) (Stk39), mRNA [NM_016866]	ENSMUSG00000027030	53416	-3.00717	10.9841	-13.6438	1.96442e-05	0.000286395	3.70611	DOWN
19393	A_52_P250400	Pcdh20	NM_178685	ref|Mus musculus protocadherin 20 (Pcdh20), mRNA [NM_178685]	ENSMUSG00000050505	219257	-3.34429	7.75677	-13.6367	1.96991e-05	0.00028676	3.70315	DOWN
18952	A_55_P1985070	Robo1	NM_019413	ref|Mus musculus roundabout homolog 1 (Drosophila) (Robo1), mRNA [NM_019413]	ENSMUSG00000022883	19876	-2.52953	5.78897	-13.6359	1.97049e-05	0.00028676	3.70284	DOWN
22536	A_51_P421846	Ech1	NM_016772	ref|Mus musculus enoyl coenzyme A hydratase 1, peroxisomal (Ech1), mRNA [NM_016772]	ENSMUSG00000053898	51798	3.60924	12.5983	13.6352	1.97109e-05	0.00028676	3.70252	UP
17707	A_55_P2026233	Uba7	NM_023738	ref|Mus musculus ubiquitin-like modifier activating enzyme 7 (Uba7), mRNA [NM_023738]	ENSMUSG00000032596	74153	3.55955	8.47543	13.6333	1.9725e-05	0.000286762	3.70177	UP
15911	A_51_P149455	Acadl	NM_007381	ref|Mus musculus acyl-Coenzyme A dehydrogenase, long-chain (Acadl), nuclear gene encoding mitochondrial protein, mRNA [NM_007381]	ENSMUSG00000026003	11363	3.67768	11.7914	13.627	1.97739e-05	0.000287271	3.69915	UP
3918	A_55_P2013043	Serpinb6b	NM_011454	ref|Mus musculus serine (or cysteine) peptidase inhibitor, clade B, member 6b (Serpinb6b), mRNA [NM_011454]	ENSMUSG00000042842	20708	2.57346	7.45571	13.6152	1.98656e-05	0.0002884	3.69425	UP
6694	A_52_P165705	Cd1d2	NM_007640	ref|Mus musculus CD1d2 antigen (Cd1d2), mRNA [NM_007640]	ENSMUSG00000041750	12480	2.58864	5.62106	13.6103	1.9904e-05	0.000288755	3.69221	UP
5929	A_55_P2091616	Krt222	NM_172946	ref|Mus musculus keratin 222 (Krt222), mRNA [NM_172946]	ENSMUSG00000035849	268481	-3.19196	10.0236	-13.6058	1.9939e-05	0.000289048	3.69035	DOWN
33795	A_55_P2039250	Mboat2	NM_026037	ref|Mus musculus membrane bound O-acyltransferase domain containing 2 (Mboat2), transcript variant 1, mRNA [NM_026037]	ENSMUSG00000020646	67216	-4.3071	9.7418	-13.6037	1.9955e-05	0.000289048	3.6895	DOWN
5365	A_51_P108659	Pon1	NM_011134	ref|Mus musculus paraoxonase 1 (Pon1), mRNA [NM_011134]	ENSMUSG00000002588	18979	6.52475	5.71279	13.602	1.99685e-05	0.000289048	3.68879	UP
16445	A_55_P2048418	Mdfic	NM_175088	ref|Mus musculus MyoD family inhibitor domain containing (Mdfic), mRNA [NM_175088]	ENSMUSG00000041390	16543	3.52696	7.94487	13.6005	1.99802e-05	0.000289048	3.68817	UP
20160	A_55_P2069033	ENSMUST00000063656	ENSMUST00000063656	ens|RIKEN cDNA A330070K13 gene [Source:MGI Symbol;Acc:MGI:2685897] [ENSMUST00000063656]	ENSMUST00000063656	NA	-3.47183	5.89517	-13.598	2.00002e-05	0.000289135	3.68711	DOWN
36203	A_55_P2186978	ENSMUST00000103343	ENSMUST00000103343	ens|immunoglobulin kappa variable 4-78 [Source:MGI Symbol;Acc:MGI:3819775] [ENSMUST00000103343]	ENSMUST00000103343	NA	5.19039	5.6947	13.5949	2.00245e-05	0.000289283	3.68582	UP
1952	A_55_P2155560	ENSMUST00000103494	ENSMUST00000103494	ens|immunoglobulin heavy variable V1-5 [Source:MGI Symbol;Acc:MGI:3704121] [ENSMUST00000103494]	ENSMUST00000103494	NA	2.23802	4.80521	13.5925	2.00429e-05	0.000289302	3.68485	UP
21565	A_52_P228551	Gpr176	NM_201367	ref|Mus musculus G protein-coupled receptor 176 (Gpr176), mRNA [NM_201367]	ENSMUSG00000040133	381413	-3.20282	7.94279	-13.5911	2.00538e-05	0.000289302	3.68427	DOWN
4332	A_51_P488730	Zfp612	NM_175480	ref|Mus musculus zinc finger protein 612 (Zfp612), mRNA [NM_175480]	ENSMUSG00000044676	234725	-3.18599	11.0414	-13.5809	2.01346e-05	0.000290105	3.68002	DOWN
38140	A_55_P1968381	Cast	NM_009817	ref|Mus musculus calpastatin (Cast), mRNA [NM_009817]	ENSMUSG00000021585	12380	2.32946	8.20159	13.5803	2.01393e-05	0.000290105	3.67977	UP
35332	A_51_P170008	Napg	NM_028017	ref|Mus musculus N-ethylmaleimide sensitive fusion protein attachment protein gamma (Napg), mRNA [NM_028017]	ENSMUSG00000024581	108123	-2.11449	10.5053	-13.5788	2.01516e-05	0.000290105	3.67912	DOWN
15039	A_51_P257885	Mmd2	NM_175217	ref|Mus musculus monocyte to macrophage differentiation-associated 2 (Mmd2), mRNA [NM_175217]	ENSMUSG00000039533	75104	-4.99509	10.7533	-13.5724	2.02017e-05	0.000290567	3.6765	DOWN
686	A_52_P131353	Camk1d	NM_177343	ref|Mus musculus calcium/calmodulin-dependent protein kinase ID (Camk1d), mRNA [NM_177343]	ENSMUSG00000039145	227541	-2.55107	7.72513	-13.5712	2.02119e-05	0.000290567	3.67596	DOWN
9999	A_52_P5905	4933407L21Rik	NR_037692	ref|Mus musculus RIKEN cDNA 4933407L21 gene (4933407L21Rik), non-coding RNA [NR_037692]	ENSMUSG00000026224	71141	-3.87097	6.20528	-13.5687	2.02317e-05	0.00029059	3.67493	DOWN
32223	A_52_P460734	Crhbp	NM_198408	ref|Mus musculus corticotropin releasing hormone binding protein (Crhbp), mRNA [NM_198408]	ENSMUSG00000021680	12919	-3.73033	6.54909	-13.5657	2.02556e-05	0.00029059	3.67367	DOWN
21677	A_51_P450527	Tagln	NM_011526	ref|Mus musculus transgelin (Tagln), mRNA [NM_011526]	ENSMUSG00000032085	21345	4.18756	11.6265	13.5657	2.02557e-05	0.00029059	3.67367	UP
310	A_55_P2023424	Trip10	NM_001242389	ref|Mus musculus thyroid hormone receptor interactor 10 (Trip10), transcript variant 1, mRNA [NM_001242389]	ENSMUSG00000019487	106628	3.91469	10.8403	13.5588	2.03101e-05	0.000291022	3.67083	UP
19691	A_55_P2161232	6720489N17Rik	NM_173381	ref|Mus musculus RIKEN cDNA 6720489N17 gene (6720489N17Rik), mRNA [NM_173381]	ENSMUSG00000072066	211378	-2.1661	5.5901	-13.5583	2.03141e-05	0.000291022	3.67062	DOWN
18801	A_55_P2126850	Nudt11	NM_021431	ref|Mus musculus nudix (nucleoside diphosphate linked moiety X)-type motif 11 (Nudt11), mRNA [NM_021431]	ENSMUSG00000073295	58242	-4.48758	9.07901	-13.5565	2.03287e-05	0.00029103	3.66986	DOWN
12469	A_51_P394394	Tspan2	NM_027533	ref|Mus musculus tetraspanin 2 (Tspan2), mRNA [NM_027533]	ENSMUSG00000027858	70747	-3.8378	10.5874	-13.5542	2.03474e-05	0.000291096	3.66889	DOWN
15114	A_55_P2121352	Cdk5	NM_007668	ref|Mus musculus cyclin-dependent kinase 5 (Cdk5), mRNA [NM_007668]	ENSMUSG00000028969	12568	-2.45593	11.6555	-13.544	2.04291e-05	0.000291917	3.66465	DOWN
10373	A_51_P503131	Wnt11	NM_009519	ref|Mus musculus wingless-related MMTV integration site 11 (Wnt11), mRNA [NM_009519]	ENSMUSG00000015957	22411	2.81989	6.68762	13.5435	2.04331e-05	0.000291917	3.66444	UP
6261	A_55_P2163812	Sept4	NM_011129	ref|Mus musculus septin 4 (Sept4), nuclear gene encoding mitochondrial protein, mRNA [NM_011129]	ENSMUSG00000020486	18952	-4.71141	12.6043	-13.5389	2.04699e-05	0.000292241	3.66253	DOWN
18560	A_55_P1996973	Gvin1	NM_029000	ref|Mus musculus GTPase, very large interferon inducible 1 (Gvin1), transcript variant A, mRNA [NM_029000]	ENSMUSG00000045868	74558	3.65711	8.04952	13.5281	2.0557e-05	0.000292818	3.65803	UP
16830	A_51_P495379	Fhod1	NM_177699	ref|Mus musculus formin homology 2 domain containing 1 (Fhod1), mRNA [NM_177699]	ENSMUSG00000014778	234686	3.06966	8.91693	13.5278	2.05601e-05	0.000292818	3.65787	UP
5089	A_55_P1964752	Slc23a3	NM_194333	ref|Mus musculus solute carrier family 23 (nucleobase transporters), member 3 (Slc23a3), mRNA [NM_194333]	ENSMUSG00000026205	22626	2.6902	4.87631	13.5274	2.05632e-05	0.000292818	3.65771	UP
23292	A_55_P1958140	B9d1	NM_013717	ref|Mus musculus B9 protein domain 1 (B9d1), mRNA [NM_013717]	ENSMUSG00000001039	27078	-2.24551	9.81622	-13.5264	2.05709e-05	0.000292818	3.65732	DOWN
31378	A_55_P1966327	ENSMUST00000100820	ENSMUST00000100820	ens|placenta specific 9 [Source:MGI Symbol;Acc:MGI:2663998] [ENSMUST00000100820]	ENSMUST00000100820	NA	4.03589	5.18252	13.5252	2.05812e-05	0.000292818	3.65679	UP
13655	A_51_P210143	Syne2	NM_001005510	ref|Mus musculus synaptic nuclear envelope 2 (Syne2), mRNA [NM_001005510]	ENSMUSG00000063450	319565	3.50075	8.80624	13.5234	2.05954e-05	0.000292818	3.65606	UP
7580	A_55_P2072661	Prex1	NM_177782	ref|Mus musculus phosphatidylinositol-3,4,5-trisphosphate-dependent Rac exchange factor 1 (Prex1), mRNA [NM_177782]	ENSMUSG00000039621	277360	-2.18914	9.92343	-13.5124	2.06852e-05	0.000293892	3.65145	DOWN
29395	A_52_P186262	ENSMUST00000103383	ENSMUST00000103383	ens|immunoglobulin kappa chain variable 6-25 [Source:MGI Symbol;Acc:MGI:4439867] [ENSMUST00000103383]	ENSMUST00000103383	NA	3.85696	5.4817	13.5046	2.07489e-05	0.000294595	3.64819	UP
18340	A_55_P2036083	Gm5797	NM_001025085	ref|Mus musculus predicted gene 5797 (Gm5797), mRNA [NM_001025085]	ENSMUSG00000072726	545013	-3.14791	8.99483	-13.502	2.077e-05	0.000294691	3.64711	DOWN
2215	A_55_P2096324	Camk4	NM_009793	ref|Mus musculus calcium/calmodulin-dependent protein kinase IV (Camk4), mRNA [NM_009793]	ENSMUSG00000038128	12326	-2.36022	6.24664	-13.499	2.07945e-05	0.000294836	3.64586	DOWN
2156	A_51_P184223	Pcdhb7	NM_053132	ref|Mus musculus protocadherin beta 7 (Pcdhb7), mRNA [NM_053132]	ENSMUSG00000045062	93878	-2.43408	6.70682	-13.4942	2.08341e-05	0.000295195	3.64385	DOWN
6872	A_51_P122035	Nipa1	NM_153578	ref|Mus musculus non imprinted in Prader-Willi/Angelman syndrome 1 homolog (human) (Nipa1), mRNA [NM_153578]	ENSMUSG00000047037	233280	-3.51111	10.7249	-13.4906	2.08641e-05	0.000295391	3.64232	DOWN
2043	A_51_P481482	Dram1	NM_027878	ref|Mus musculus DNA-damage regulated autophagy modulator 1 (Dram1), mRNA [NM_027878]	ENSMUSG00000020057	71712	4.00684	5.67933	13.4891	2.08766e-05	0.000295391	3.64169	UP
20784	A_51_P135654	Eif4ebp2	NM_010124	ref|Mus musculus eukaryotic translation initiation factor 4E binding protein 2 (Eif4ebp2), mRNA [NM_010124]	ENSMUSG00000020091	13688	2.93247	11.329	13.4835	2.09227e-05	0.000295752	3.63935	UP
34419	A_55_P2104259	Plin5	NM_001077348	ref|Mus musculus perilipin 5 (Plin5), transcript variant 2, mRNA [NM_001077348]	ENSMUSG00000011305	66968	7.0593	9.57041	13.4825	2.09307e-05	0.000295752	3.63894	UP
36629	A_55_P2050877	Plekhg2	NM_138752	ref|Mus musculus pleckstrin homology domain containing, family G (with RhoGef domain) member 2 (Plekhg2), transcript variant 1, mRNA [NM_138752]	ENSMUSG00000037552	101497	2.60675	9.72439	13.4758	2.09865e-05	0.000296239	3.63612	UP
8863	A_52_P332487	Ptpn7	NM_177081	ref|Mus musculus protein tyrosine phosphatase, non-receptor type 7 (Ptpn7), mRNA [NM_177081]	ENSMUSG00000031506	320139	2.06715	4.5683	13.4749	2.09939e-05	0.000296239	3.63575	UP
11178	A_55_P2161140	Rgs6	NM_015812	ref|Mus musculus regulator of G-protein signaling 6 (Rgs6), mRNA [NM_015812]	ENSMUSG00000021219	50779	-2.2977	6.20245	-13.472	2.10183e-05	0.000296382	3.63451	DOWN
14511	A_55_P1998416	Ifi47	NM_008330	ref|Mus musculus interferon gamma inducible protein 47 (Ifi47), mRNA [NM_008330]	ENSMUSG00000078920	15953	3.24577	7.95981	13.4642	2.10833e-05	0.000296996	3.63124	UP
13700	A_55_P1970810	Agpat2	ENSMUST00000028286	ens|1-acylglycerol-3-phosphate O-acyltransferase 2 (lysophosphatidic acid acyltransferase, beta) [Source:MGI Symbol;Acc:MGI:1914762] [ENSMUST00000028286]	ENSMUSG00000026922	67512	7.49702	9.86863	13.4621	2.11006e-05	0.000296996	3.63037	UP
33605	A_55_P2074801	Ptpn14	NM_008976	ref|Mus musculus protein tyrosine phosphatase, non-receptor type 14 (Ptpn14), mRNA [NM_008976]	ENSMUSG00000026604	19250	2.22021	5.55091	13.4616	2.11051e-05	0.000296996	3.63015	UP
3829	A_51_P483280	Prnp	NM_011170	ref|Mus musculus prion protein (Prnp), mRNA [NM_011170]	ENSMUSG00000079037	19122	-2.17784	14.0629	-13.458	2.11351e-05	0.000297215	3.62864	DOWN
3413	A_52_P190394	Gnas	NM_201617	ref|Mus musculus GNAS (guanine nucleotide binding protein, alpha stimulating) complex locus (Gnas), transcript variant 6, mRNA [NM_201617]	ENSMUSG00000027523	14683	-2.23421	10.1143	-13.4489	2.12112e-05	0.000297697	3.62483	DOWN
15237	A_66_P110490	Polr3h	NM_030229	ref|Mus musculus polymerase (RNA) III (DNA directed) polypeptide H (Polr3h), mRNA [NM_030229]	ENSMUSG00000022476	78929	-2.26622	7.6092	-13.4488	2.12121e-05	0.000297697	3.62479	DOWN
23340	A_55_P2124070	Ttbk1	NM_001162864	ref|Mus musculus tau tubulin kinase 1 (Ttbk1), mRNA [NM_001162864]	ENSMUSG00000015599	106763	-3.2124	7.28774	-13.4487	2.12125e-05	0.000297697	3.62476	DOWN
17496	A_55_P2117764	Vangl2	NM_033509	ref|Mus musculus vang-like 2 (van gogh, Drosophila) (Vangl2), mRNA [NM_033509]	ENSMUSG00000026556	93840	-2.4319	6.79578	-13.4437	2.12548e-05	0.000298087	3.62265	DOWN
868	A_51_P104718	Gpr12	NM_001010941	ref|Mus musculus G-protein coupled receptor 12 (Gpr12), transcript variant 1, mRNA [NM_001010941]	ENSMUSG00000041468	14738	-2.52362	4.95945	-13.429	2.1379e-05	0.000299626	3.61647	DOWN
2187	A_51_P419117	Rab15	NM_134050	ref|Mus musculus RAB15, member RAS oncogene family (Rab15), mRNA [NM_134050]	ENSMUSG00000021062	104886	-2.46859	8.99447	-13.4239	2.14224e-05	0.00030003	3.61432	DOWN
5935	A_51_P462271	Acan	NM_007424	ref|Mus musculus aggrecan (Acan), mRNA [NM_007424]	ENSMUSG00000030607	11595	-3.16536	7.25483	-13.42	2.14557e-05	0.000300292	3.61268	DOWN
29732	A_55_P1966987	Limk1	NM_010717	ref|Mus musculus LIM-domain containing, protein kinase (Limk1), mRNA [NM_010717]	ENSMUSG00000029674	16885	-4.28695	12.5259	-13.4169	2.14824e-05	0.000300435	3.61136	DOWN
25760	A_55_P1975660	Hemgn	NM_053149	ref|Mus musculus hemogen (Hemgn), mRNA [NM_053149]	ENSMUSG00000028332	93966	3.19713	11.4938	13.4141	2.15062e-05	0.000300435	3.61018	UP
19675	A_55_P2112245	Ccdc13	AK038868	gb|Mus musculus adult male hypothalamus cDNA, RIKEN full-length enriched library, clone:A230069K20 product:hypothetical Regulator of chromosome condensation (RCC1) containing protein, full insert sequence. [AK038868]	ENSMUSG00000079235	100502861	-3.18305	7.84768	-13.4137	2.15095e-05	0.000300435	3.61002	DOWN
11377	A_55_P2459897	A2m	NM_175628	ref|Mus musculus alpha-2-macroglobulin (A2m), mRNA [NM_175628]	ENSMUSG00000030111	232345	-3.07143	5.55692	-13.4086	2.15531e-05	0.000300839	3.60787	DOWN
2794	A_55_P1999775	Slc7a4	NM_144852	ref|Mus musculus solute carrier family 7 (cationic amino acid transporter, y+ system), member 4 (Slc7a4), mRNA [NM_144852]	ENSMUSG00000022756	224022	-2.16941	6.73056	-13.4035	2.15969e-05	0.000301156	3.60572	DOWN
31916	A_55_P2039086	Nfkbiz	NM_030612	ref|Mus musculus nuclear factor of kappa light polypeptide gene enhancer in B-cells inhibitor, zeta (Nfkbiz), transcript variant 1, mRNA [NM_030612]	ENSMUSG00000035356	80859	2.07186	5.84116	13.4023	2.16072e-05	0.000301156	3.60521	UP
25257	A_51_P454196	Sh2d4a	NM_028182	ref|Mus musculus SH2 domain containing 4A (Sh2d4a), mRNA [NM_028182]	ENSMUSG00000053886	72281	2.19161	4.66642	13.4007	2.16215e-05	0.000301156	3.6045	UP
10780	A_52_P416280	Enpp6	NM_177304	ref|Mus musculus ectonucleotide pyrophosphatase/phosphodiesterase 6 (Enpp6), mRNA [NM_177304]	ENSMUSG00000038173	320981	-3.8776	6.58997	-13.3992	2.16341e-05	0.000301156	3.60389	DOWN
148	A_55_P1977038	Cxcl9	NM_008599	ref|Mus musculus chemokine (C-X-C motif) ligand 9 (Cxcl9), mRNA [NM_008599]	ENSMUSG00000029417	17329	4.77851	5.10292	13.3828	2.17753e-05	0.000302912	3.59698	UP
33609	A_66_P136801	Peg13	NR_002864	ref|Mus musculus paternally expressed 13 (Peg13), non-coding RNA [NR_002864]	ENSMUSG00000106847	353342	-2.56071	13.9411	-13.3812	2.17896e-05	0.000302912	3.59629	DOWN
5266	A_51_P400752	H2-Q5	NM_010393	ref|Mus musculus histocompatibility 2, Q region locus 5 (H2-Q5), mRNA [NM_010393]	ENSMUSG00000055413	15016	2.55045	11.6418	13.3772	2.18246e-05	0.000303053	3.59459	UP
4306	A_55_P1974567	Plch2	NM_175556	ref|Mus musculus phospholipase C, eta 2 (Plch2), transcript variant 1, mRNA [NM_175556]	ENSMUSG00000029055	269615	-2.58205	6.1502	-13.3767	2.18291e-05	0.000303053	3.59437	DOWN
31581	A_55_P2181743	Elmod1	NM_177769	ref|Mus musculus ELMO domain containing 1 (Elmod1), mRNA [NM_177769]	ENSMUSG00000041986	270162	-6.76729	10.0488	-13.372	2.18695e-05	0.000303409	3.5924	DOWN
37803	A_55_P2082310	Rtkn2	NM_001081346	ref|Mus musculus rhotekin 2 (Rtkn2), mRNA [NM_001081346]	ENSMUSG00000037846	170799	-2.31888	5.08411	-13.3663	2.19194e-05	0.000303791	3.58998	DOWN
16081	A_55_P1982410	Gpm6b	ENSMUST00000123408	ens|glycoprotein m6b [Source:MGI Symbol;Acc:MGI:107672] [ENSMUST00000123408]	ENSMUSG00000031342	14758	-2.96688	8.8955	-13.3655	2.19264e-05	0.000303791	3.58964	DOWN
32057	A_55_P1983708	Insrr	NM_011832	ref|Mus musculus insulin receptor-related receptor (Insrr), mRNA [NM_011832]	ENSMUSG00000005640	23920	3.32104	5.75581	13.3631	2.1947e-05	0.000303852	3.58865	UP
4387	A_52_P659762	Eid2	NM_198425	ref|Mus musculus EP300 interacting inhibitor of differentiation 2 (Eid2), mRNA [NM_198425]	ENSMUSG00000046058	386655	-2.40385	8.56295	-13.3616	2.19603e-05	0.000303852	3.588	DOWN
20816	A_66_P117389	Rcn2	NM_011992	ref|Mus musculus reticulocalbin 2 (Rcn2), mRNA [NM_011992]	ENSMUSG00000032320	26611	-2.85463	10.9052	-13.3571	2.2e-05	0.000304198	3.58609	DOWN
4245	A_52_P1011	Fgf14	NM_010201	ref|Mus musculus fibroblast growth factor 14 (Fgf14), transcript variant 1, mRNA [NM_010201]	ENSMUSG00000025551	14169	-2.13123	6.0383	-13.3545	2.20229e-05	0.0003042	3.58498	DOWN
12055	A_66_P105585	Slfn8	NM_001167743	ref|Mus musculus schlafen 8 (Slfn8), transcript variant 2, mRNA [NM_001167743]	ENSMUSG00000035208	276950	2.11382	4.93467	13.3537	2.20296e-05	0.0003042	3.58466	UP
11965	A_51_P514029	Cma1	NM_010780	ref|Mus musculus chymase 1, mast cell (Cma1), mRNA [NM_010780]	ENSMUSG00000022225	17228	4.00411	4.96617	13.3501	2.20615e-05	0.000304273	3.58312	UP
5204	A_55_P1978018	Gm5458	NM_001024706	ref|Mus musculus predicted gene 5458 (Gm5458), mRNA [NM_001024706]	ENSMUSG00000095024	432825	-2.31503	6.52322	-13.3498	2.20644e-05	0.000304273	3.58298	DOWN
20603	A_52_P530291	Pim1	NM_008842	ref|Mus musculus proviral integration site 1 (Pim1), mRNA [NM_008842]	ENSMUSG00000024014	18712	3.80423	7.03596	13.3437	2.21182e-05	0.000304578	3.5804	UP
14403	A_55_P2153621	Ahnak	NM_001039959	ref|Mus musculus AHNAK nucleoprotein (desmoyokin) (Ahnak), transcript variant 3, mRNA [NM_001039959]	ENSMUSG00000069833	66395	3.64493	8.81998	13.3434	2.21202e-05	0.000304578	3.5803	UP
8716	A_55_P1996354	Wdr31	NM_023597	ref|Mus musculus WD repeat domain 31 (Wdr31), mRNA [NM_023597]	ENSMUSG00000028391	71354	-2.20321	9.30751	-13.3423	2.21307e-05	0.000304578	3.5798	DOWN
7064	A_55_P2129000	Cyyr1	NM_144853	ref|Mus musculus cysteine and tyrosine-rich protein 1 (Cyyr1), mRNA [NM_144853]	ENSMUSG00000041134	224405	4.08205	5.96245	13.3378	2.21705e-05	0.00030476	3.57789	UP
15480	A_52_P411430	Gm5914	XR_106165	ref|PREDICTED: Mus musculus predicted gene 5914 (Gm5914), miscRNA [XR_106165]	ENSMUSG00000098120	546100	-2.21653	7.5746	-13.3364	2.21827e-05	0.00030476	3.5773	DOWN
640	A_55_P2058671	Zfyve28	NM_001015039	ref|Mus musculus zinc finger, FYVE domain containing 28 (Zfyve28), mRNA [NM_001015039]	ENSMUSG00000037224	231125	-2.35932	6.21331	-13.3358	2.21882e-05	0.00030476	3.57704	DOWN
23476	A_51_P441426	Pf4	NM_019932	ref|Mus musculus platelet factor 4 (Pf4), mRNA [NM_019932]	ENSMUSG00000029373	56744	5.51259	8.62542	13.3339	2.22045e-05	0.000304781	3.57626	UP
3108	A_52_P539632	Plxna3	NM_008883	ref|Mus musculus plexin A3 (Plxna3), mRNA [NM_008883]	ENSMUSG00000031398	18846	-2.49167	7.65964	-13.3288	2.22502e-05	0.000305205	3.57407	DOWN
26396	A_55_P2207255	Srpx	NM_016911	ref|Mus musculus sushi-repeat-containing protein (Srpx), mRNA [NM_016911]	ENSMUSG00000090084	51795	4.30964	6.32297	13.3252	2.22822e-05	0.000305441	3.57255	UP
11540	A_51_P146149	Napsa	NM_008437	ref|Mus musculus napsin A aspartic peptidase (Napsa), mRNA [NM_008437]	ENSMUSG00000002204	16541	4.68526	5.29937	13.3128	2.23932e-05	0.000306758	3.56727	UP
946	A_52_P353478	Scn7a	NM_009135	ref|Mus musculus sodium channel, voltage-gated, type VII, alpha (Scn7a), mRNA [NM_009135]	ENSMUSG00000034810	20272	2.46998	4.50802	13.3046	2.24669e-05	0.000307412	3.56378	UP
10991	A_55_P2108988	Kcnip3	NM_001111331	ref|Mus musculus Kv channel interacting protein 3, calsenilin (Kcnip3), transcript variant 2, mRNA [NM_001111331]	ENSMUSG00000079056	56461	-2.49137	7.79463	-13.3041	2.24707e-05	0.000307412	3.5636	DOWN
21715	A_55_P2118684	Idh2	NM_173011	ref|Mus musculus isocitrate dehydrogenase 2 (NADP+), mitochondrial (Idh2), nuclear gene encoding mitochondrial protein, mRNA [NM_173011]	ENSMUSG00000030541	269951	3.55098	13.6323	13.2971	2.25344e-05	0.000307744	3.56059	UP
22580	A_55_P2003388	Kcns2	NM_181317	ref|Mus musculus K+ voltage-gated channel, subfamily S, 2 (Kcns2), mRNA [NM_181317]	ENSMUSG00000050963	16539	-3.13237	5.05069	-13.2962	2.25427e-05	0.000307744	3.5602	DOWN
1423	A_55_P1998943	Oas1a	NM_145211	ref|Mus musculus 2'-5' oligoadenylate synthetase 1A (Oas1a), mRNA [NM_145211]	ENSMUSG00000052776	246730	2.22636	6.24573	13.2956	2.25475e-05	0.000307744	3.55997	UP
21039	A_51_P131442	Dpf1	NM_013874	ref|Mus musculus D4, zinc and double PHD fingers family 1 (Dpf1), mRNA [NM_013874]	ENSMUSG00000030584	29861	-3.89293	7.96978	-13.2946	2.25571e-05	0.000307744	3.55952	DOWN
34353	A_55_P2014760	Fam135b	NM_177819	ref|Mus musculus family with sequence similarity 135, member B (Fam135b), mRNA [NM_177819]	ENSMUSG00000036800	70363	-3.04219	5.60563	-13.2932	2.25695e-05	0.000307744	3.55894	DOWN
7669	A_55_P2056055	Zfp114	ENSMUST00000108440	ens|zinc finger protein 114 [Source:MGI Symbol;Acc:MGI:3037815] [ENSMUST00000108440]	ENSMUSG00000068962	232966	-2.13149	6.34185	-13.291	2.25892e-05	0.000307809	3.55801	DOWN
758	A_51_P243134	Adcy6	NM_007405	ref|Mus musculus adenylate cyclase 6 (Adcy6), mRNA [NM_007405]	ENSMUSG00000022994	11512	2.54651	9.09549	13.2749	2.27355e-05	0.000309599	3.55115	UP
6337	A_55_P1976734	Cacna2d2	NM_001174047	ref|Mus musculus calcium channel, voltage-dependent, alpha 2/delta subunit 2 (Cacna2d2), transcript variant 1, mRNA [NM_001174047]	ENSMUSG00000010066	56808	-3.73479	7.47956	-13.2695	2.27847e-05	0.000310065	3.54885	DOWN
32779	A_52_P500979	Pcsk1	NM_013628	ref|Mus musculus proprotein convertase subtilisin/kexin type 1 (Pcsk1), mRNA [NM_013628]	ENSMUSG00000021587	18548	-2.9089	8.23732	-13.262	2.28534e-05	0.000310794	3.54565	DOWN
21344	A_66_P103398	Ogfrl1	NM_001081079	ref|Mus musculus opioid growth factor receptor-like 1 (Ogfrl1), mRNA [NM_001081079]	ENSMUSG00000026158	70155	-2.66193	9.24878	-13.2585	2.28863e-05	0.000311037	3.54412	DOWN
15486	A_51_P333111	Aox1	NM_009676	ref|Mus musculus aldehyde oxidase 1 (Aox1), mRNA [NM_009676]	ENSMUSG00000063558	11761	3.87445	10.4096	13.2547	2.29207e-05	0.000311299	3.54252	UP
37793	A_52_P111845	Nxph2	NM_008752	ref|Mus musculus neurexophilin 2 (Nxph2), mRNA [NM_008752]	ENSMUSG00000069132	18232	-2.63352	4.78371	-13.248	2.29831e-05	0.000311942	3.53963	DOWN
948	A_55_P2231244	Lhx1	NM_008498	ref|Mus musculus LIM homeobox protein 1 (Lhx1), mRNA [NM_008498]	ENSMUSG00000018698	16869	-2.47765	5.82777	-13.2417	2.30411e-05	0.000312419	3.53695	DOWN
37741	A_55_P2008634	Pcdhb10	NM_053135	ref|Mus musculus protocadherin beta 10 (Pcdhb10), mRNA [NM_053135]	ENSMUSG00000045657	93881	-2.38253	5.96749	-13.2409	2.30486e-05	0.000312419	3.53661	DOWN
33817	A_55_P1972034	Muc16	ENSMUST00000034653	ens|mucin 16 [Source:MGI Symbol;Acc:MGI:1920982] [ENSMUST00000034653]	ENSMUSG00000109564	73732	4.50275	6.24258	13.2304	2.31457e-05	0.000313391	3.53214	UP
18325	A_51_P240136	Gng8	NM_010320	ref|Mus musculus guanine nucleotide binding protein (G protein), gamma 8 (Gng8), mRNA [NM_010320]	ENSMUSG00000063594	14709	-3.81608	8.54856	-13.2299	2.31506e-05	0.000313391	3.53191	DOWN
26869	A_55_P2180481	ENSMUST00000162547	ENSMUST00000162547	ens|Riken cDNA 1810020O05 gene [Source:MGI Symbol;Acc:MGI:3586838] [ENSMUST00000162547]	ENSMUST00000162547	NA	-2.63724	6.37587	-13.2279	2.31695e-05	0.000313441	3.53104	DOWN
6727	A_55_P2147083	Tnfaip6	NM_009398	ref|Mus musculus tumor necrosis factor alpha induced protein 6 (Tnfaip6), mRNA [NM_009398]	ENSMUSG00000053475	21930	-3.74014	6.81673	-13.2228	2.32167e-05	0.000313824	3.52888	DOWN
33964	A_55_P2210280	1700063D05Rik	CJ056044	gb|CJ056044 RIKEN full-length enriched mouse cDNA library, C57BL [CJ056044]	ENSMUSG00000100837	78500	-4.61477	4.59414	-13.2196	2.32472e-05	0.000313824	3.52748	DOWN
2673	A_52_P307761	Gnaz	NM_010311	ref|Mus musculus guanine nucleotide binding protein, alpha z subunit (Gnaz), mRNA [NM_010311]	ENSMUSG00000040009	14687	-2.8448	7.09487	-13.2195	2.32479e-05	0.000313824	3.52745	DOWN
36971	A_55_P2126790	1500009L16Rik	NM_001145198	ref|Mus musculus RIKEN cDNA 1500009L16 gene (1500009L16Rik), mRNA [NM_001145198]	ENSMUSG00000087651	69784	-3.21552	7.26134	-13.2164	2.32772e-05	0.000313824	3.52611	DOWN
790	A_52_P51429	Dennd1c	NM_153551	ref|Mus musculus DENN/MADD domain containing 1C (Dennd1c), mRNA [NM_153551]	ENSMUSG00000002668	70785	2.28907	6.73058	13.2164	2.32774e-05	0.000313824	3.5261	UP
38995	A_51_P242859	Akr1c12	NM_013777	ref|Mus musculus aldo-keto reductase family 1, member C12 (Akr1c12), mRNA [NM_013777]	ENSMUSG00000021211	622402	2.72041	5.14671	13.2142	2.32976e-05	0.000313824	3.52518	UP
3323	A_55_P2172935	Dgkb	ENSMUST00000085447	ens|diacylglycerol kinase, beta [Source:MGI Symbol;Acc:MGI:2442474] [ENSMUST00000085447]	ENSMUSG00000036095	217480	-2.4095	6.6938	-13.2135	2.33042e-05	0.000313824	3.52487	DOWN
27694	A_55_P2151056	Rarg	NM_011244	ref|Mus musculus retinoic acid receptor, gamma (Rarg), transcript variant 1, mRNA [NM_011244]	ENSMUSG00000001288	19411	2.46635	9.93475	13.1943	2.34855e-05	0.000315966	3.51663	UP
13265	A_55_P2080168	Dgkk	NM_177914	ref|Mus musculus diacylglycerol kinase kappa (Dgkk), mRNA [NM_177914]	ENSMUSG00000062393	331374	-4.51139	7.41335	-13.1922	2.35055e-05	0.000315966	3.51572	DOWN
1392	A_51_P391445	Ifngr1	NM_010511	ref|Mus musculus interferon gamma receptor 1 (Ifngr1), mRNA [NM_010511]	ENSMUSG00000020009	15979	2.24867	10.6458	13.1918	2.35092e-05	0.000315966	3.51556	UP
19337	A_51_P344008	Slc25a20	NM_020520	ref|Mus musculus solute carrier family 25 (mitochondrial carnitine/acylcarnitine translocase), member 20 (Slc25a20), nuclear gene encoding mitochondrial protein, mRNA [NM_020520]	ENSMUSG00000032602	57279	4.7129	9.37049	13.1834	2.35888e-05	0.00031683	3.51196	UP
4637	A_52_P343306	H2-Aa	NM_010378	ref|Mus musculus histocompatibility 2, class II antigen A, alpha (H2-Aa), mRNA [NM_010378]	ENSMUSG00000036594	14960	5.98083	6.79379	13.179	2.36311e-05	0.000317051	3.51005	UP
37223	A_51_P142813	Aspn	NM_025711	ref|Mus musculus asporin (Aspn), transcript variant 1, mRNA [NM_025711]	ENSMUSG00000021388	66695	4.08072	5.60129	13.1785	2.3636e-05	0.000317051	3.50983	UP
32	A_55_P2040878	Ung	NM_001040691	ref|Mus musculus uracil DNA glycosylase (Ung), transcript variant 1, mRNA [NM_001040691]	ENSMUSG00000029591	22256	3.06138	11.3149	13.1731	2.36879e-05	0.00031754	3.5075	UP
3913	A_51_P247359	Ptprcap	NM_016933	ref|Mus musculus protein tyrosine phosphatase, receptor type, C polypeptide-associated protein (Ptprcap), mRNA [NM_016933]	ENSMUSG00000045826	19265	3.80569	8.00949	13.1703	2.3714e-05	0.000317684	3.50633	UP
3726	A_55_P2009187	Iffo1	NM_001039669	ref|Mus musculus intermediate filament family orphan 1 (Iffo1), transcript variant 1, mRNA [NM_001039669]	ENSMUSG00000038271	320678	-2.10152	9.82751	-13.1476	2.39331e-05	0.000320234	3.49653	DOWN
3689	A_51_P415395	C2cd4b	NM_001081314	ref|Mus musculus C2 calcium-dependent domain containing 4B (C2cd4b), mRNA [NM_001081314]	ENSMUSG00000091956	75697	-2.3504	5.49283	-13.1474	2.39353e-05	0.000320234	3.49643	DOWN
19316	A_51_P139184	Fank1	NM_025850	ref|Mus musculus fibronectin type 3 and ankyrin repeat domains 1 (Fank1), mRNA [NM_025850]	ENSMUSG00000053111	66930	-3.41334	5.61249	-13.1407	2.40004e-05	0.000320897	3.49354	DOWN
1943	A_51_P116651	Dpt	NM_019759	ref|Mus musculus dermatopontin (Dpt), mRNA [NM_019759]	ENSMUSG00000026574	56429	5.66613	5.88272	13.1356	2.405e-05	0.000321351	3.49135	UP
29651	A_55_P2053838	Tnfaip3	NM_009397	ref|Mus musculus tumor necrosis factor, alpha-induced protein 3 (Tnfaip3), transcript variant 1, mRNA [NM_009397]	ENSMUSG00000019850	21929	2.25981	7.26878	13.1303	2.41015e-05	0.000321831	3.48907	UP
2258	A_51_P365008	Tns1	NM_027884	ref|Mus musculus tensin 1 (Tns1), mRNA [NM_027884]	ENSMUSG00000055322	21961	4.07119	10.8937	13.1211	2.41913e-05	0.000322715	3.48511	UP
4657	A_55_P2150851	Pla2g3	ENSMUST00000044682	ens|phospholipase A2, group III [Source:MGI Symbol;Acc:MGI:2444945] [ENSMUST00000044682]	ENSMUSG00000034579	237625	-3.15618	6.44109	-13.119	2.42122e-05	0.000322715	3.48419	DOWN
3377	A_55_P1974961	Plekhg3	NM_153804	ref|Mus musculus pleckstrin homology domain containing, family G (with RhoGef domain) member 3 (Plekhg3), mRNA [NM_153804]	ENSMUSG00000052609	263406	2.45325	10.7731	13.1181	2.42214e-05	0.000322715	3.48378	UP
36257	A_51_P253732	Il17rd	NM_134437	ref|Mus musculus interleukin 17 receptor D (Il17rd), mRNA [NM_134437]	ENSMUSG00000040717	171463	2.01806	7.12791	13.1172	2.42302e-05	0.000322715	3.48339	UP
24354	A_51_P319070	Retsat	NM_026159	ref|Mus musculus retinol saturase (all trans retinol 13,14 reductase) (Retsat), mRNA [NM_026159]	ENSMUSG00000056666	67442	3.46043	10.5927	13.111	2.42911e-05	0.000323235	3.48072	UP
24171	A_55_P1998947	Trim16	NM_053169	ref|Mus musculus tripartite motif-containing 16 (Trim16), mRNA [NM_053169]	ENSMUSG00000047821	94092	2.72855	7.56125	13.1088	2.43127e-05	0.000323235	3.47977	UP
22451	A_51_P277088	Igfals	NM_008340	ref|Mus musculus insulin-like growth factor binding protein, acid labile subunit (Igfals), mRNA [NM_008340]	ENSMUSG00000046070	16005	4.14293	5.19492	13.1084	2.43162e-05	0.000323235	3.47962	UP
8652	A_51_P122425	Ctf1	NM_007795	ref|Mus musculus cardiotrophin 1 (Ctf1), mRNA [NM_007795]	ENSMUSG00000042340	13019	2.46789	8.56717	13.0987	2.44129e-05	0.000324311	3.47539	UP
26687	A_51_P232207	Hoxb6	NM_008269	ref|Mus musculus homeobox B6 (Hoxb6), mRNA [NM_008269]	ENSMUSG00000000690	15414	-3.04578	11.4189	-13.0966	2.44334e-05	0.000324376	3.47449	DOWN
9337	A_51_P259296	Lpl	NM_008509	ref|Mus musculus lipoprotein lipase (Lpl), mRNA [NM_008509]	ENSMUSG00000015568	16956	8.68971	9.71937	13.0935	2.44643e-05	0.000324576	3.47315	UP
16898	A_51_P351217	Rab39	NM_175562	ref|Mus musculus RAB39, member RAS oncogene family (Rab39), mRNA [NM_175562]	ENSMUSG00000055069	270160	-2.58778	5.97721	-13.0825	2.45743e-05	0.000325669	3.46837	DOWN
11186	A_55_P2117272	Kcnt1	ENSMUST00000114170	ens|potassium channel, subfamily T, member 1 [Source:MGI Symbol;Acc:MGI:1924627] [ENSMUST00000114170]	ENSMUSG00000058740	227632	-2.34815	6.95145	-13.0821	2.45782e-05	0.000325669	3.4682	DOWN
36794	A_51_P214083	2310039H08Rik	NM_025966	ref|Mus musculus RIKEN cDNA 2310039H08 gene (2310039H08Rik), mRNA [NM_025966]	ENSMUSG00000062619	67101	3.16507	10.0864	13.0801	2.45983e-05	0.000325726	3.46733	UP
6398	A_52_P463977	Tmem140	NM_197986	ref|Mus musculus transmembrane protein 140 (Tmem140), mRNA [NM_197986]	ENSMUSG00000057137	68487	4.83002	8.99032	13.0755	2.4644e-05	0.000325998	3.46535	UP
2808	A_51_P269404	Fmo3	NM_008030	ref|Mus musculus flavin containing monooxygenase 3 (Fmo3), mRNA [NM_008030]	ENSMUSG00000026691	14262	4.11589	5.31744	13.0742	2.46572e-05	0.000325998	3.46478	UP
30178	A_55_P2083351	Hs3st1	NM_010474	ref|Mus musculus heparan sulfate (glucosamine) 3-O-sulfotransferase 1 (Hs3st1), mRNA [NM_010474]	ENSMUSG00000051022	15476	-2.29116	7.65533	-13.0708	2.4691e-05	0.000325998	3.46332	DOWN
16812	A_52_P444946	Rprml	NM_001033212	ref|Mus musculus reprimo-like (Rprml), mRNA [NM_001033212]	ENSMUSG00000046215	104582	-2.31122	6.86474	-13.0693	2.47066e-05	0.000325998	3.46265	DOWN
30661	A_51_P313157	Arhgef5	NM_133674	ref|Mus musculus Rho guanine nucleotide exchange factor (GEF) 5 (Arhgef5), mRNA [NM_133674]	ENSMUSG00000033542	54324	2.23665	6.59992	13.0688	2.47116e-05	0.000325998	3.46243	UP
35082	A_55_P2065510	ENSMUST00000103506	ENSMUST00000103506	ens|immunoglobulin heavy variable V1-20 [Source:MGI Symbol;Acc:MGI:3644607] [ENSMUST00000103506]	ENSMUST00000103506	NA	4.12326	5.47222	13.0686	2.47135e-05	0.000325998	3.46235	UP
19083	A_55_P2088178	Cbln2	NM_172633	ref|Mus musculus cerebellin 2 precursor protein (Cbln2), mRNA [NM_172633]	ENSMUSG00000024647	12405	-2.9825	7.18591	-13.0636	2.47643e-05	0.000326415	3.46016	DOWN
37443	A_51_P154485	Fcrla	NM_145141	ref|Mus musculus Fc receptor-like A (Fcrla), transcript variant 2, mRNA [NM_145141]	ENSMUSG00000038421	98752	3.67532	4.98931	13.0623	2.47768e-05	0.000326415	3.45962	UP
14302	A_52_P400425	Pirt	NM_178656	ref|Mus musculus phosphoinositide-interacting regulator of transient receptor potential channels (Pirt), mRNA [NM_178656]	ENSMUSG00000048070	193003	2.12751	5.13046	13.0504	2.48974e-05	0.000327794	3.45445	UP
16464	A_55_P1966372	Srek1	NM_172592	ref|Mus musculus splicing regulatory glutamine/lysine-rich protein 1 (Srek1), mRNA [NM_172592]	ENSMUSG00000032621	218543	2.58415	11.3521	13.044	2.49627e-05	0.000327953	3.45165	UP
32468	A_55_P2106931	Kcna2	NM_008417	ref|Mus musculus potassium voltage-gated channel, shaker-related subfamily, member 2 (Kcna2), mRNA [NM_008417]	ENSMUSG00000040724	16490	-4.29567	8.59872	-13.0439	2.49633e-05	0.000327953	3.45163	DOWN
6638	A_55_P1969027	Rgs9	ENSMUST00000106704	ens|regulator of G-protein signaling 9 [Source:MGI Symbol;Acc:MGI:1338824] [ENSMUST00000106704]	ENSMUSG00000020599	19739	-2.54918	6.86369	-13.0437	2.49655e-05	0.000327953	3.45153	DOWN
25412	A_52_P134023	Rtp3	NM_153100	ref|Mus musculus receptor transporter protein 3 (Rtp3), mRNA [NM_153100]	ENSMUSG00000066319	235636	3.55122	4.91304	13.041	2.49929e-05	0.000327953	3.45036	UP
133	A_55_P1994492	Usp31	NM_001033173	ref|Mus musculus ubiquitin specific peptidase 31 (Usp31), mRNA [NM_001033173]	ENSMUSG00000063317	76179	-2.50385	8.8655	-13.0395	2.50088e-05	0.000327953	3.44968	DOWN
25425	A_55_P1971244	Ndufa4l2	NM_001098789	ref|Mus musculus NADH dehydrogenase (ubiquinone) 1 alpha subcomplex, 4-like 2 (Ndufa4l2), mRNA [NM_001098789]	ENSMUSG00000040280	407790	2.87788	8.91206	13.0383	2.50206e-05	0.000327953	3.44918	UP
25136	A_55_P1952314	Olfr1415	NM_001011525	ref|Mus musculus olfactory receptor 1415 (Olfr1415), mRNA [NM_001011525]	ENSMUSG00000057464	258228	-3.30585	6.19085	-13.0383	2.50207e-05	0.000327953	3.44918	DOWN
2633	A_55_P2144556	Flrt3	NM_001172160	ref|Mus musculus fibronectin leucine rich transmembrane protein 3 (Flrt3), transcript variant 1, mRNA [NM_001172160]	ENSMUSG00000051379	71436	-2.75388	7.69101	-13.0283	2.51227e-05	0.000329073	3.44484	DOWN
4185	A_55_P2102489	Lrrtm4	ENSMUST00000064509	ens|leucine rich repeat transmembrane neuronal 4 [Source:MGI Symbol;Acc:MGI:2389180] [ENSMUST00000064509]	ENSMUSG00000052581	243499	-2.35932	5.3625	-13.0269	2.51379e-05	0.000329073	3.44419	DOWN
10133	A_51_P211573	Wdr47	NM_181400	ref|Mus musculus WD repeat domain 47 (Wdr47), mRNA [NM_181400]	ENSMUSG00000040389	99512	-2.64368	10.4417	-13.0227	2.51806e-05	0.000329422	3.44238	DOWN
20408	A_52_P30312	Ccr9	NM_009913	ref|Mus musculus chemokine (C-C motif) receptor 9 (Ccr9), transcript variant 2, mRNA [NM_009913]	ENSMUSG00000029530	12769	2.16534	4.54832	13.0177	2.52324e-05	0.00032989	3.44019	UP
22777	A_52_P623117	Sgcd	ENSMUST00000109220	ens|sarcoglycan, delta (dystrophin-associated glycoprotein) [Source:MGI Symbol;Acc:MGI:1346525] [ENSMUST00000109220]	ENSMUSG00000020354	24052	2.72069	5.1306	13.0084	2.53288e-05	0.000330942	3.43612	UP
12566	A_55_P2034663	Csf2rb2	NM_007781	ref|Mus musculus colony stimulating factor 2 receptor, beta 2, low-affinity (granulocyte-macrophage) (Csf2rb2), mRNA [NM_007781]	ENSMUSG00000071714	12984	2.84947	6.6496	13.005	2.53638e-05	0.000330951	3.43465	UP
6084	A_52_P380301	Unc5c	NM_009472	ref|Mus musculus unc-5 homolog C (C. elegans) (Unc5c), mRNA [NM_009472]	ENSMUSG00000059921	22253	-2.96846	6.55946	-13.0041	2.53727e-05	0.000330951	3.43428	DOWN
9046	A_55_P2157730	Gpr158	ENSMUST00000155760	ens|G protein-coupled receptor 158 [Source:MGI Symbol;Acc:MGI:2441697] [ENSMUST00000155760]	ENSMUSG00000045967	241263	-2.54579	6.23504	-13.0037	2.53776e-05	0.000330951	3.43407	DOWN
30985	A_55_P2056821	A330008L17Rik	XR_035291	ref|PREDICTED: Mus musculus RIKEN cDNA A330008L17 gene (A330008L17Rik), miscRNA [XR_035291]	ENSMUSG00000052479	234624	-2.22795	5.69498	-13.0011	2.54038e-05	0.000331083	3.43297	DOWN
10932	A_51_P130079	Lrmp	NM_008511	ref|Mus musculus lymphoid-restricted membrane protein (Lrmp), mRNA [NM_008511]	ENSMUSG00000030263	16970	3.11684	7.00044	12.9948	2.54702e-05	0.000331311	3.43018	UP
7968	A_51_P502713	Vwc2	ENSMUST00000129670	ens|von Willebrand factor C domain containing 2 [Source:MGI Symbol;Acc:MGI:2442987] [ENSMUST00000129670]	ENSMUSG00000050830	319922	-2.00864	5.46341	-12.9946	2.54723e-05	0.000331311	3.4301	DOWN
30169	A_52_P496726	Rasd1	NM_009026	ref|Mus musculus RAS, dexamethasone-induced 1 (Rasd1), mRNA [NM_009026]	ENSMUSG00000049892	19416	3.75305	7.89617	12.9939	2.54796e-05	0.000331311	3.42979	UP
3358	A_55_P2036994	Zic3	ENSMUST00000088629	ens|zinc finger protein of the cerebellum 3 [Source:MGI Symbol;Acc:MGI:106676] [ENSMUST00000088629]	ENSMUSG00000067860	22773	-3.12336	5.02077	-12.9933	2.54854e-05	0.000331311	3.42954	DOWN
23542	A_55_P1976470	ENSMUST00000149246	ENSMUST00000149246	ens|RIKEN cDNA 2410018L13 gene [Source:MGI Symbol;Acc:MGI:1916982] [ENSMUST00000149246]	ENSMUST00000149246	NA	-2.11179	6.8652	-12.9895	2.55248e-05	0.000331548	3.4279	DOWN
27413	A_51_P474459	Socs3	NM_007707	ref|Mus musculus suppressor of cytokine signaling 3 (Socs3), mRNA [NM_007707]	ENSMUSG00000053113	12702	2.701	8.16117	12.9885	2.55358e-05	0.000331548	3.42744	UP
15733	A_55_P2097478	Gda	NM_010266	ref|Mus musculus guanine deaminase (Gda), mRNA [NM_010266]	ENSMUSG00000058624	14544	2.78765	7.63719	12.982	2.56039e-05	0.000332223	3.4246	UP
6433	A_52_P585652	Fndc3b	NM_173182	ref|Mus musculus fibronectin type III domain containing 3B (Fndc3b), mRNA [NM_173182]	ENSMUSG00000039286	72007	2.19926	7.71053	12.9803	2.56214e-05	0.000332241	3.42387	UP
28964	A_52_P132761	Stat6	NM_009284	ref|Mus musculus signal transducer and activator of transcription 6 (Stat6), mRNA [NM_009284]	ENSMUSG00000002147	20852	2.49291	5.84839	12.9756	2.56715e-05	0.000332682	3.42178	UP
9767	A_55_P2174067	Cerk	NM_145475	ref|Mus musculus ceramide kinase (Cerk), mRNA [NM_145475]	ENSMUSG00000035891	223753	-2.3053	10.9623	-12.9708	2.57213e-05	0.00033298	3.41971	DOWN
14107	A_55_P2052897	Arhgap30	NM_001005508	ref|Mus musculus Rho GTPase activating protein 30 (Arhgap30), mRNA [NM_001005508]	ENSMUSG00000048865	226652	2.82943	6.53296	12.9701	2.57288e-05	0.00033298	3.4194	UP
6447	A_66_P118139	ENSMUST00000143781	ENSMUST00000143781	ens|predicted gene 11669 [Source:MGI Symbol;Acc:MGI:3649867] [ENSMUST00000143781]	ENSMUST00000143781	NA	-2.53332	5.8661	-12.9688	2.57429e-05	0.00033298	3.41882	DOWN
20761	A_51_P413866	Cfb	NM_008198	ref|Mus musculus complement factor B (Cfb), transcript variant 1, mRNA [NM_008198]	ENSMUSG00000090231	14962	7.22332	7.04297	12.957	2.58674e-05	0.000334381	3.41367	UP
25694	A_55_P2129316	ENSMUST00000089689	ENSMUST00000089689	ens|predicted pseudogene 10238 [Source:MGI Symbol;Acc:MGI:3641620] [ENSMUST00000089689]	ENSMUST00000089689	NA	2.65032	8.84166	12.9539	2.59006e-05	0.000334601	3.4123	UP
8487	A_51_P413302	Tpo	NM_009417	ref|Mus musculus thyroid peroxidase (Tpo), mRNA [NM_009417]	ENSMUSG00000020673	22018	-2.04983	4.84475	-12.9452	2.59935e-05	0.000335536	3.40848	DOWN
12789	A_52_P243391	Sema4f	NM_011350	ref|Mus musculus sema domain, immunoglobulin domain (Ig), TM domain, and short cytoplasmic domain (Sema4f), transcript variant 1, mRNA [NM_011350]	ENSMUSG00000000627	20355	-2.43233	5.79928	-12.9439	2.60075e-05	0.000335536	3.4079	DOWN
14356	A_66_P113466	ENSMUST00000103334	ENSMUST00000103334	ens|predicted gene, 16906 [Source:MGI Symbol;Acc:MGI:4439830] [ENSMUST00000103334]	ENSMUST00000103334	NA	3.60202	5.05039	12.9426	2.60217e-05	0.000335536	3.40732	UP
17068	A_51_P223724	Khdrbs2	NM_133235	ref|Mus musculus KH domain containing, RNA binding, signal transduction associated 2 (Khdrbs2), mRNA [NM_133235]	ENSMUSG00000026058	170771	-4.25097	6.48507	-12.9243	2.62182e-05	0.000337857	3.39928	DOWN
30805	A_55_P2030282	ENSMUSG00000068790	NM_001029930	ref|Mus musculus predicted gene, ENSMUSG00000068790 (ENSMUSG00000068790), mRNA [NM_001029930]	ENSMUSG00000068790	NA	-2.77236	8.51645	-12.9213	2.62498e-05	0.0003379	3.398	DOWN
1773	A_55_P2112991	Slc4a3	NM_009208	ref|Mus musculus solute carrier family 4 (anion exchanger), member 3 (Slc4a3), mRNA [NM_009208]	ENSMUSG00000006576	20536	-2.83069	9.07801	-12.9209	2.62542e-05	0.0003379	3.39782	DOWN
28574	A_55_P2154914	Acap1	NM_153788	ref|Mus musculus ArfGAP with coiled-coil, ankyrin repeat and PH domains 1 (Acap1), mRNA [NM_153788]	ENSMUSG00000001588	216859	3.81921	6.61046	12.9157	2.63114e-05	0.000338425	3.3955	UP
17020	A_51_P147284	Slain1	NM_198014	ref|Mus musculus SLAIN motif family, member 1 (Slain1), mRNA [NM_198014]	ENSMUSG00000055717	105439	-6.20725	8.34798	-12.9113	2.63583e-05	0.000338817	3.39359	DOWN
26374	A_51_P346964	Mrap	NM_029844	ref|Mus musculus melanocortin 2 receptor accessory protein (Mrap), mRNA [NM_029844]	ENSMUSG00000039956	77037	8.14126	8.36224	12.9089	2.63847e-05	0.000338946	3.39252	UP
16168	A_51_P275454	Trim30a	NM_009099	ref|Mus musculus tripartite motif-containing 30A (Trim30a), mRNA [NM_009099]	ENSMUSG00000030921	20128	2.68288	6.654	12.8996	2.64864e-05	0.00034004	3.38841	UP
21749	A_55_P2151006	C1qtnf7	NM_001135172	ref|Mus musculus C1q and tumor necrosis factor related protein 7 (C1qtnf7), transcript variant 1, mRNA [NM_001135172]	ENSMUSG00000061535	109323	2.813	6.50276	12.8911	2.65792e-05	0.000340942	3.38467	UP
26864	A_55_P2318309	Airn	CB233867	gb|AGENCOURT_11445370 NIH_MGC_166 Mus musculus cDNA clone IMAGE:30249080 5', mRNA sequence [CB233867]	ENSMUSG00000078247	104103	2.32041	5.75738	12.8896	2.65951e-05	0.000340942	3.38404	UP
26158	A_52_P413646	Bmp6	NM_007556	ref|Mus musculus bone morphogenetic protein 6 (Bmp6), mRNA [NM_007556]	ENSMUSG00000039004	12161	2.90114	7.88346	12.8883	2.66095e-05	0.000340942	3.38346	UP
4258	A_55_P2154450	Xkr6	NM_173393	ref|Mus musculus X Kell blood group precursor related family member 6 homolog (Xkr6), mRNA [NM_173393]	ENSMUSG00000035067	219149	-2.07812	6.10881	-12.8871	2.66226e-05	0.000340942	3.38293	DOWN
7507	A_55_P2081178	Msl3l2	NM_001163833	ref|Mus musculus male-specific lethal 3-like 2 (Drosophila) (Msl3l2), mRNA [NM_001163833]	ENSMUSG00000047669	73390	-2.91618	8.42742	-12.881	2.66896e-05	0.000341587	3.38025	DOWN
33439	A_52_P79782	Wnt7a	NM_009527	ref|Mus musculus wingless-related MMTV integration site 7A (Wnt7a), mRNA [NM_009527]	ENSMUSG00000030093	22421	-3.29929	6.37328	-12.8782	2.67205e-05	0.000341771	3.37901	DOWN
16078	A_66_P132657	Epha6	NM_007938	ref|Mus musculus Eph receptor A6 (Epha6), mRNA [NM_007938]	ENSMUSG00000055540	13840	-3.5958	5.56122	-12.8743	2.67639e-05	0.000342114	3.37727	DOWN
29970	A_55_P2097022	Eid1	NM_025613	ref|Mus musculus EP300 interacting inhibitor of differentiation 1 (Eid1), mRNA [NM_025613]	ENSMUSG00000091337	58521	-2.16423	9.56518	-12.8669	2.6846e-05	0.000342951	3.374	DOWN
16389	A_51_P247799	Casp8	NM_009812	ref|Mus musculus caspase 8 (Casp8), transcript variant 1, mRNA [NM_009812]	ENSMUSG00000026029	12370	2.89358	7.61853	12.8631	2.68879e-05	0.00034316	3.37234	UP
11780	A_51_P151902	Spon1	NM_145584	ref|Mus musculus spondin 1, (f-spondin) extracellular matrix protein (Spon1), mRNA [NM_145584]	ENSMUSG00000038156	233744	-2.96891	7.89247	-12.8624	2.68956e-05	0.00034316	3.37203	DOWN
14313	A_55_P1958379	Slit1	NM_015748	ref|Mus musculus slit homolog 1 (Drosophila) (Slit1), mRNA [NM_015748]	ENSMUSG00000025020	20562	-3.49482	8.92413	-12.8579	2.69463e-05	0.00034354	3.37001	DOWN
19567	A_55_P1981704	Ccdc113	NM_172914	ref|Mus musculus coiled-coil domain containing 113 (Ccdc113), mRNA [NM_172914]	ENSMUSG00000036598	244608	-4.14899	7.09708	-12.8568	2.69587e-05	0.00034354	3.36952	DOWN
15557	A_51_P391764	Cbx6	NM_028763	ref|Mus musculus chromobox homolog 6 (Cbx6), mRNA [NM_028763]	ENSMUSG00000089715	494448	-2.41416	10.1816	-12.8522	2.70098e-05	0.000343979	3.3675	DOWN
13553	A_55_P2107686	Ttll1	NM_178869	ref|Mus musculus tubulin tyrosine ligase-like 1 (Ttll1), mRNA [NM_178869]	ENSMUSG00000022442	319953	-2.34806	9.09953	-12.85	2.70339e-05	0.000344075	3.36654	DOWN
6806	A_51_P403834	Syngr3	NM_011522	ref|Mus musculus synaptogyrin 3 (Syngr3), mRNA [NM_011522]	ENSMUSG00000007021	20974	-3.29568	8.13048	-12.8394	2.71534e-05	0.00034528	3.36183	DOWN
12978	A_52_P168567	Cebpa	NM_007678	ref|Mus musculus CCAAT/enhancer binding protein (C/EBP), alpha (Cebpa), mRNA [NM_007678]	ENSMUSG00000034957	12606	4.42545	9.21859	12.8386	2.71621e-05	0.00034528	3.36149	UP
7068	A_51_P131216	Usp54	NM_030180	ref|Mus musculus ubiquitin specific peptidase 54 (Usp54), mRNA [NM_030180]	ENSMUSG00000034235	78787	-2.17104	6.96531	-12.8336	2.72186e-05	0.00034578	3.35927	DOWN
327	A_52_P238523	Sprn	NM_183147	ref|Mus musculus shadow of prion protein (Sprn), mRNA [NM_183147]	ENSMUSG00000045733	212518	-3.01737	8.39596	-12.8322	2.72349e-05	0.00034578	3.35862	DOWN
19749	A_55_P2133835	1700023F06Rik	ENSMUST00000107026	ens|RIKEN cDNA 1700023F06 gene [Source:MGI Symbol;Acc:MGI:1916691] [ENSMUST00000107026]	ENSMUSG00000020940	69441	-3.59334	8.1099	-12.8264	2.72996e-05	0.000346388	3.35609	DOWN
19563	A_51_P146760	Pcdhb20	NM_053145	ref|Mus musculus protocadherin beta 20 (Pcdhb20), mRNA [NM_053145]	ENSMUSG00000046191	93891	-2.24868	8.15369	-12.8247	2.73195e-05	0.000346427	3.35531	DOWN
20916	A_55_P2014224	Sema5a	NM_009154	ref|Mus musculus sema domain, seven thrombospondin repeats (type 1 and type 1-like), transmembrane domain (TM) and short cytoplasmic domain, (semaphorin) 5A (Sema5a), mRNA [NM_009154]	ENSMUSG00000022231	20356	-2.10154	10.1523	-12.8197	2.73762e-05	0.000346933	3.35309	DOWN
20831	A_55_P2012694	Kcnh5	NM_172805	ref|Mus musculus potassium voltage-gated channel, subfamily H (eag-related), member 5 (Kcnh5), mRNA [NM_172805]	ENSMUSG00000034402	238271	-4.43871	6.52631	-12.8162	2.74153e-05	0.000347215	3.35157	DOWN
38613	A_51_P281333	St3gal6	NM_018784	ref|Mus musculus ST3 beta-galactoside alpha-2,3-sialyltransferase 6 (St3gal6), mRNA [NM_018784]	ENSMUSG00000022747	54613	2.25941	9.51801	12.8124	2.74592e-05	0.000347363	3.34985	UP
4027	A_51_P298455	Fam163b	NM_175427	ref|Mus musculus family with sequence similarity 163, member B (Fam163b), mRNA [NM_175427]	ENSMUSG00000009216	109349	-3.79463	7.25193	-12.8123	2.74606e-05	0.000347363	3.3498	DOWN
15713	A_55_P2044045	Ybx1	NM_011732	ref|Mus musculus Y box protein 1 (Ybx1), mRNA [NM_011732]	ENSMUSG00000028639	22608	2.15531	10.6411	12.8093	2.74941e-05	0.000347575	3.34849	UP
15290	A_55_P2160676	Ret	NM_001080780	ref|Mus musculus ret proto-oncogene (Ret), transcript variant 4, mRNA [NM_001080780]	ENSMUSG00000030110	19713	-2.81489	9.62675	-12.8073	2.75172e-05	0.000347653	3.3476	DOWN
14729	A_51_P485756	Nts	NM_024435	ref|Mus musculus neurotensin (Nts), mRNA [NM_024435]	ENSMUSG00000019890	67405	-4.29558	9.36154	-12.8033	2.75626e-05	0.000347981	3.34583	DOWN
21465	A_55_P2183884	Mc4r	NM_016977	ref|Mus musculus melanocortin 4 receptor (Mc4r), mRNA [NM_016977]	ENSMUSG00000047259	17202	-4.01623	6.1656	-12.8021	2.75769e-05	0.000347981	3.34528	DOWN
1663	A_51_P172231	Gsdmd	NM_026960	ref|Mus musculus gasdermin D (Gsdmd), mRNA [NM_026960]	ENSMUSG00000022575	69146	2.43458	7.3675	12.7932	2.76789e-05	0.000349055	3.34133	UP
16649	A_66_P114641	Cdh18	ENSMUST00000040427	ens|cadherin 18 [Source:MGI Symbol;Acc:MGI:1344366] [ENSMUST00000040427]	ENSMUSG00000040420	320865	-2.86115	5.71724	-12.7911	2.77032e-05	0.000349148	3.34039	DOWN
18662	A_65_P08998	Dzip3	NM_001110017	ref|Mus musculus DAZ interacting protein 3, zinc finger (Dzip3), transcript variant 1, mRNA [NM_001110017]	ENSMUSG00000064061	224170	-2.4173	4.39776	-12.7889	2.77289e-05	0.000349259	3.3394	DOWN
24366	A_55_P2044364	Mms22l	NM_199467	ref|Mus musculus MMS22-like, DNA repair protein (Mms22l), mRNA [NM_199467]	ENSMUSG00000045751	212377	3.01268	11.0907	12.7848	2.77754e-05	0.000349631	3.33761	UP
25840	A_55_P2038007	Csrp1	NM_007791	ref|Mus musculus cysteine and glycine-rich protein 1 (Csrp1), mRNA [NM_007791]	ENSMUSG00000026421	13007	-2.36603	15.7773	-12.7832	2.77941e-05	0.000349653	3.33689	DOWN
30270	A_51_P341130	Iqgap1	NM_016721	ref|Mus musculus IQ motif containing GTPase activating protein 1 (Iqgap1), mRNA [NM_016721]	ENSMUSG00000030536	29875	2.93379	8.33883	12.7797	2.78344e-05	0.000349947	3.33534	UP
36395	A_55_P2088401	H2-T9	NM_010399	ref|Mus musculus histocompatibility 2, T region locus 9 (H2-T9), mRNA [NM_010399]	ENSMUSG00000056116	15051	2.37539	7.42933	12.766	2.79944e-05	0.000351745	3.3292	UP
10752	A_66_P105947	Nkain3	NM_172987	ref|Mus musculus Na+/K+ transporting ATPase interacting 3 (Nkain3), mRNA [NM_172987]	ENSMUSG00000055761	269513	-2.07559	4.55699	-12.7594	2.80713e-05	0.000352496	3.32626	DOWN
14697	A_55_P2063462	ENSMUST00000051253	ENSMUST00000051253	ens|netrin G1 [Source:MGI Symbol;Acc:MGI:1934028] [ENSMUST00000051253]	ENSMUST00000051253	NA	-2.00204	5.56592	-12.756	2.81108e-05	0.000352777	3.32476	DOWN
14611	A_51_P273684	Gbe1	NM_028803	ref|Mus musculus glucan (1,4-alpha-), branching enzyme 1 (Gbe1), mRNA [NM_028803]	ENSMUSG00000022707	74185	3.69658	8.76939	12.7521	2.81566e-05	0.000353138	3.32301	UP
16057	A_66_P121086	Map3k8	NM_007746	ref|Mus musculus mitogen-activated protein kinase kinase kinase 8 (Map3k8), mRNA [NM_007746]	ENSMUSG00000024235	26410	2.04478	6.12717	12.74	2.82992e-05	0.000354711	3.31761	UP
12182	A_55_P1961270	Cd72	NM_001110320	ref|Mus musculus CD72 antigen (Cd72), transcript variant 1, mRNA [NM_001110320]	ENSMUSG00000028459	12517	3.78758	6.0304	12.718	2.85598e-05	0.000357652	3.30779	UP
6024	A_55_P2036863	Rabl2	NM_026817	ref|Mus musculus RAB, member of RAS oncogene family-like 2 (Rabl2), mRNA [NM_026817]	ENSMUSG00000022621	68708	-2.1177	8.40729	-12.7164	2.8579e-05	0.000357652	3.30707	DOWN
23059	A_51_P443693	Rasl10b	NM_001013386	ref|Mus musculus RAS-like, family 10, member B (Rasl10b), mRNA [NM_001013386]	ENSMUSG00000020684	276952	-2.77058	6.60542	-12.7159	2.85858e-05	0.000357652	3.30682	DOWN
9809	A_55_P1978441	Kif3a	NM_008443	ref|Mus musculus kinesin family member 3A (Kif3a), mRNA [NM_008443]	ENSMUSG00000018395	16568	-2.72998	11.181	-12.7105	2.86497e-05	0.000358234	3.30443	DOWN
36134	A_55_P1980237	Acad11	NM_175324	ref|Mus musculus acyl-Coenzyme A dehydrogenase family, member 11 (Acad11), mRNA [NM_175324]	ENSMUSG00000090150	102632	2.96493	11.8219	12.7073	2.86887e-05	0.000358429	3.30297	UP
18566	A_55_P1982049	Icam2	NM_010494	ref|Mus musculus intercellular adhesion molecule 2 (Icam2), mRNA [NM_010494]	ENSMUSG00000001029	15896	3.51256	9.96497	12.7063	2.87e-05	0.000358429	3.30255	UP
13585	A_52_P267824	Ces2g	NM_197999	ref|Mus musculus carboxylesterase 2G (Ces2g), mRNA [NM_197999]	ENSMUSG00000031877	72361	3.11569	4.96061	12.7042	2.87261e-05	0.000358537	3.30158	UP
8988	A_55_P1984596	Stxbp5	NM_001081344	ref|Mus musculus syntaxin binding protein 5 (tomosyn) (Stxbp5), mRNA [NM_001081344]	ENSMUSG00000019790	78808	-2.56625	6.71488	-12.6978	2.88027e-05	0.000359276	3.29872	DOWN
5158	A_51_P278994	Swap70	NM_009302	ref|Mus musculus SWA-70 protein (Swap70), mRNA [NM_009302]	ENSMUSG00000031015	20947	2.26641	7.54727	12.6916	2.8877e-05	0.000359869	3.29596	UP
6695	A_51_P375667	Tcea2	NM_009326	ref|Mus musculus transcription elongation factor A (SII), 2 (Tcea2), mRNA [NM_009326]	ENSMUSG00000059540	21400	-2.49275	7.94203	-12.691	2.88851e-05	0.000359869	3.29566	DOWN
25200	A_52_P973575	Hoxb9	NM_008270	ref|Mus musculus homeobox B9 (Hoxb9), mRNA [NM_008270]	ENSMUSG00000020875	15417	-4.6854	8.48883	-12.6841	2.89685e-05	0.000360691	3.29257	DOWN
11610	A_55_P2161595	Hpca	NM_001130419	ref|Mus musculus hippocalcin (Hpca), mRNA [NM_001130419]	ENSMUSG00000028785	15444	-4.092	10.9787	-12.6813	2.90022e-05	0.000360893	3.29133	DOWN
16706	A_55_P2103837	Gbp4	NM_008620	ref|Mus musculus guanylate binding protein 4 (Gbp4), mRNA [NM_008620]	ENSMUSG00000079363	17472	4.37828	6.14958	12.6788	2.9033e-05	0.000361059	3.29019	UP
24476	A_52_P497021	Spred3	NM_182927	ref|Mus musculus sprouty-related, EVH1 domain containing 3 (Spred3), mRNA [NM_182927]	ENSMUSG00000037239	101809	-2.88309	4.76687	-12.674	2.90915e-05	0.000361569	3.28803	DOWN
6768	A_55_P1997225	Agap2	NM_001033263	ref|Mus musculus ArfGAP with GTPase domain, ankyrin repeat and PH domain 2 (Agap2), mRNA [NM_001033263]	ENSMUSG00000025422	216439	-3.00647	10.3839	-12.6616	2.92425e-05	0.000362954	3.28248	DOWN
5796	A_52_P527917	Slc16a10	NM_028247	ref|Mus musculus solute carrier family 16 (monocarboxylic acid transporters), member 10 (Slc16a10), transcript variant 2, mRNA [NM_028247]	ENSMUSG00000019838	72472	2.51948	4.93534	12.6607	2.92541e-05	0.000362954	3.28206	UP
12061	A_55_P2138878	Lrfn4	NM_153388	ref|Mus musculus leucine rich repeat and fibronectin type III domain containing 4 (Lrfn4), mRNA [NM_153388]	ENSMUSG00000045045	225875	-2.40404	9.57862	-12.6605	2.92558e-05	0.000362954	3.282	DOWN
33934	A_55_P2006915	Myo5c	NM_001081322	ref|Mus musculus myosin VC (Myo5c), mRNA [NM_001081322]	ENSMUSG00000033590	208943	3.23865	4.8004	12.6551	2.93229e-05	0.000363561	3.27954	UP
14666	A_55_P2095251	Ell3	NM_145973	ref|Mus musculus elongation factor RNA polymerase II-like 3 (Ell3), mRNA [NM_145973]	ENSMUSG00000027246	269344	2.40879	5.16164	12.6537	2.93399e-05	0.000363561	3.27892	UP
28954	A_55_P2065199	Pgr15l	NM_001033361	ref|Mus musculus G protein-coupled receptor 15-like (Pgr15l), mRNA [NM_001033361]	ENSMUSG00000031212	245526	-3.14058	4.98703	-12.6482	2.94073e-05	0.000364178	3.27646	DOWN
16662	A_55_P1994769	Gpr174	NM_001177781	ref|Mus musculus G protein-coupled receptor 174 (Gpr174), transcript variant 1, mRNA [NM_001177781]	ENSMUSG00000073008	213439	2.41751	3.42669	12.6155	2.98155e-05	0.000368701	3.26168	UP
921	A_55_P2068891	Pear1	NM_028460	ref|Mus musculus platelet endothelial aggregation receptor 1 (Pear1), transcript variant 1, mRNA [NM_028460]	ENSMUSG00000028073	73182	2.30157	5.80622	12.6124	2.9854e-05	0.000368701	3.2603	UP
3279	A_55_P1997465	Ggnbp1	NM_027544	ref|Mus musculus gametogenetin binding protein 1 (Ggnbp1), mRNA [NM_027544]	ENSMUSG00000048731	70772	2.22711	7.23863	12.612	2.98592e-05	0.000368701	3.26011	UP
8476	A_51_P234847	1700001L19Rik	NM_027035	ref|Mus musculus RIKEN cDNA 1700001L19 gene (1700001L19Rik), mRNA [NM_027035]	ENSMUSG00000021534	69315	-4.9993	7.82215	-12.6104	2.98793e-05	0.000368701	3.25939	DOWN
19971	A_55_P1955442	Gm2897	NM_001177715	ref|Mus musculus predicted gene 2897 (Gm2897), transcript variant 2, mRNA [NM_001177715]	ENSMUSG00000079410	100040671	-2.0483	7.00467	-12.6094	2.98914e-05	0.000368701	3.25895	DOWN
6298	A_52_P361534	Wnt3	NM_009521	ref|Mus musculus wingless-related MMTV integration site 3 (Wnt3), mRNA [NM_009521]	ENSMUSG00000000125	22415	-3.82623	6.49413	-12.6083	2.99054e-05	0.000368701	3.25845	DOWN
2341	A_55_P1984259	ENSMUST00000050386	ENSMUST00000050386	ens|cDNA sequence AB041803 [Source:MGI Symbol;Acc:MGI:2673128] [ENSMUST00000050386]	ENSMUST00000050386	NA	2.28357	8.11412	12.6076	2.99146e-05	0.000368701	3.25812	UP
5982	A_55_P2179582	Nmur2	NM_153079	ref|Mus musculus neuromedin U receptor 2 (Nmur2), mRNA [NM_153079]	ENSMUSG00000037393	216749	-3.71879	6.24815	-12.6073	2.99183e-05	0.000368701	3.25799	DOWN
10777	A_52_P435670	Npepl1	NM_213733	ref|Mus musculus aminopeptidase-like 1 (Npepl1), mRNA [NM_213733]	ENSMUSG00000039263	228961	2.15992	10.313	12.6055	2.99414e-05	0.000368701	3.25716	UP
38434	A_51_P514712	Parp14	NM_001039530	ref|Mus musculus poly (ADP-ribose) polymerase family, member 14 (Parp14), mRNA [NM_001039530]	ENSMUSG00000034422	547253	3.44275	7.61175	12.6034	2.99678e-05	0.000368701	3.25622	UP
1524	A_52_P217437	Htra3	NM_001042615	ref|Mus musculus HtrA serine peptidase 3 (Htra3), transcript variant 2, mRNA [NM_001042615]	ENSMUSG00000029096	78558	2.50458	6.75319	12.6024	2.99805e-05	0.000368701	3.25577	UP
9703	A_51_P381988	Hmx1	NM_010445	ref|Mus musculus H6 homeobox 1 (Hmx1), mRNA [NM_010445]	ENSMUSG00000067438	15371	3.12558	4.50174	12.6019	2.99869e-05	0.000368701	3.25553	UP
3291	A_55_P2148116	Tsr2	NM_001164578	ref|Mus musculus TSR2, 20S rRNA accumulation, homolog (S. cerevisiae) (Tsr2), transcript variant 1, mRNA [NM_001164578]	ENSMUSG00000025264	69499	-2.49764	9.17993	-12.5967	3.00529e-05	0.000369293	3.25318	DOWN
37778	A_55_P2099269	Ift80	NM_026641	ref|Mus musculus intraflagellar transport 80 homolog (Chlamydomonas) (Ift80), mRNA [NM_026641]	ENSMUSG00000027778	68259	-2.13786	9.52397	-12.5934	3.00936e-05	0.000369372	3.25172	DOWN
23976	A_55_P2052913	ENSMUST00000103448	ENSMUST00000103448	ens|predicted gene, 16949 [Source:MGI Symbol;Acc:MGI:4439873] [ENSMUST00000103448]	ENSMUST00000103448	NA	2.41608	5.03339	12.591	3.01243e-05	0.00036951	3.25063	UP
5878	A_55_P2018106	Gm14085	NM_001085518	ref|Mus musculus predicted gene 14085 (Gm14085), mRNA [NM_001085518]	ENSMUSG00000079071	381417	2.70997	4.60105	12.5838	3.02159e-05	0.000370195	3.24737	UP
19278	A_51_P202050	Dtx1	NM_008052	ref|Mus musculus deltex 1 homolog (Drosophila) (Dtx1), mRNA [NM_008052]	ENSMUSG00000029603	14357	-3.43582	11.5459	-12.58	3.02652e-05	0.00037036	3.24562	DOWN
6282	A_51_P503937	Calm1	NM_009790	ref|Mus musculus calmodulin 1 (Calm1), mRNA [NM_009790]	ENSMUSG00000001175	12313	-2.66013	14.5356	-12.5779	3.02923e-05	0.00037036	3.24466	DOWN
39228	A_55_P2136906	Vpreb3	NM_009514	ref|Mus musculus pre-B lymphocyte gene 3 (Vpreb3), mRNA [NM_009514]	ENSMUSG00000000903	22364	3.1309	6.96849	12.5777	3.02939e-05	0.00037036	3.24461	UP
5453	A_51_P366770	Rims1	NM_001012625	ref|Mus musculus regulating synaptic membrane exocytosis 1 (Rims1), transcript variant 5, mRNA [NM_001012625]	ENSMUSG00000041670	116837	-2.22884	5.64379	-12.5765	3.03103e-05	0.00037036	3.24403	DOWN
25252	A_52_P625218	Sorcs3	NM_025696	ref|Mus musculus sortilin-related VPS10 domain containing receptor 3 (Sorcs3), mRNA [NM_025696]	ENSMUSG00000063434	66673	-4.64115	6.17242	-12.5758	3.03191e-05	0.00037036	3.24372	DOWN
16213	A_51_P154379	Tmem150c	NM_182841	ref|Mus musculus transmembrane protein 150C (Tmem150c), mRNA [NM_182841]	ENSMUSG00000050640	231503	-4.11296	6.97354	-12.5726	3.03595e-05	0.000370634	3.24229	DOWN
20691	A_55_P2015137	Frmpd4	NM_001033330	ref|Mus musculus FERM and PDZ domain containing 4 (Frmpd4), mRNA [NM_001033330]	ENSMUSG00000049176	333605	-4.11268	7.46441	-12.566	3.04445e-05	0.000371438	3.23929	DOWN
37029	A_55_P2400322	Lrch2	NM_001081173	ref|Mus musculus leucine-rich repeats and calponin homology (CH) domain containing 2 (Lrch2), mRNA [NM_001081173]	ENSMUSG00000031290	210297	-2.09194	6.21204	-12.5647	3.04614e-05	0.000371438	3.23869	DOWN
21746	A_55_P2227355	Ptpro	NM_011216	ref|Mus musculus protein tyrosine phosphatase, receptor type, O (Ptpro), transcript variant 1, mRNA [NM_011216]	ENSMUSG00000030223	19277	-2.26697	8.95745	-12.5625	3.04896e-05	0.000371562	3.2377	DOWN
26887	A_52_P11441	Rab6b	NM_173781	ref|Mus musculus RAB6B, member RAS oncogene family (Rab6b), mRNA [NM_173781]	ENSMUSG00000032549	270192	-3.32808	14.0719	-12.5504	3.06463e-05	0.000373253	3.2322	DOWN
5775	A_52_P348250	Klhl29	NM_001164493	ref|Mus musculus kelch-like 29 (Drosophila) (Klhl29), mRNA [NM_001164493]	ENSMUSG00000020627	208439	-2.62271	7.26124	-12.5481	3.06752e-05	0.000373384	3.23119	DOWN
18640	A_52_P552589	Map4k1	NM_008279	ref|Mus musculus mitogen-activated protein kinase kinase kinase kinase 1 (Map4k1), mRNA [NM_008279]	ENSMUSG00000037337	26411	3.15193	7.72761	12.5446	3.07207e-05	0.000373717	3.22959	UP
38316	A_52_P449871	Id4	NM_031166	ref|Mus musculus inhibitor of DNA binding 4 (Id4), mRNA [NM_031166]	ENSMUSG00000021379	15904	-3.75472	9.45025	-12.543	3.07415e-05	0.000373751	3.22887	DOWN
4113	A_55_P2101246	Aldh6a1	NM_134042	ref|Mus musculus aldehyde dehydrogenase family 6, subfamily A1 (Aldh6a1), nuclear gene encoding mitochondrial protein, mRNA [NM_134042]	ENSMUSG00000021238	104776	2.52178	10.6237	12.538	3.0807e-05	0.000374325	3.22659	UP
11582	A_55_P2003266	Fam107a	NM_183187	ref|Mus musculus family with sequence similarity 107, member A (Fam107a), mRNA [NM_183187]	ENSMUSG00000021750	268709	-3.03277	11.1069	-12.5291	3.09239e-05	0.000375525	3.22252	DOWN
38575	A_52_P66226	Rab33a	NM_011228	ref|Mus musculus RAB33A, member of RAS oncogene family (Rab33a), mRNA [NM_011228]	ENSMUSG00000031104	19337	-4.59892	9.05495	-12.5185	3.10627e-05	0.000376989	3.21771	DOWN
7521	A_55_P2128153	Col6a1	NM_009933	ref|Mus musculus collagen, type VI, alpha 1 (Col6a1), mRNA [NM_009933]	ENSMUSG00000001119	12833	3.90177	9.51708	12.5161	3.10945e-05	0.000377154	3.21661	UP
13381	A_52_P236705	Ripply3	NM_133229	ref|Mus musculus ripply3 homolog (zebrafish) (Ripply3), mRNA [NM_133229]	ENSMUSG00000022941	170765	3.39907	4.6004	12.513	3.11353e-05	0.000377426	3.2152	UP
15627	A_55_P2040936	Eng	NM_001146350	ref|Mus musculus endoglin (Eng), transcript variant 2, mRNA [NM_001146350]	ENSMUSG00000026814	13805	2.77673	8.79492	12.5102	3.11722e-05	0.000377652	3.21393	UP
13582	A_51_P187602	Serpinb5	NM_009257	ref|Mus musculus serine (or cysteine) peptidase inhibitor, clade B, member 5 (Serpinb5), mRNA [NM_009257]	ENSMUSG00000067006	20724	-3.11663	5.59398	-12.5081	3.12003e-05	0.000377771	3.21296	DOWN
10595	A_55_P1979768	Hoxa9	NM_010456	ref|Mus musculus homeobox A9 (Hoxa9), mRNA [NM_010456]	ENSMUSG00000038227	15405	-2.23472	7.62763	-12.5011	3.12933e-05	0.000378646	3.20977	DOWN
20805	A_55_P2304614	C530044C16Rik	AK049716	gb|Mus musculus 12 days embryo spinal cord cDNA, RIKEN full-length enriched library, clone:C530044C16 product:unclassifiable, full insert sequence. [AK049716]	ENSMUSG00000107667	319981	-3.25802	6.13047	-12.4999	3.13093e-05	0.000378646	3.20922	DOWN
2347	A_52_P265965	Trim36	NM_178872	ref|Mus musculus tripartite motif-containing 36 (Trim36), transcript variant 1, mRNA [NM_178872]	ENSMUSG00000033949	28105	-3.73509	7.05002	-12.4936	3.13926e-05	0.000379431	3.20637	DOWN
9285	A_51_P309501	Praf2	NM_138602	ref|Mus musculus PRA1 domain family 2 (Praf2), mRNA [NM_138602]	ENSMUSG00000031149	54637	-2.72487	10.3918	-12.4858	3.14979e-05	0.000380482	3.20277	DOWN
29720	A_51_P384402	Dll4	NM_019454	ref|Mus musculus delta-like 4 (Drosophila) (Dll4), mRNA [NM_019454]	ENSMUSG00000027314	54485	2.1243	5.13699	12.477	3.16158e-05	0.0003816	3.19876	UP
39198	A_51_P392377	Ppfia2	NM_177373	ref|Mus musculus protein tyrosine phosphatase, receptor type, f polypeptide (PTPRF), interacting protein (liprin), alpha 2 (Ppfia2), transcript variant 2, mRNA [NM_177373]	ENSMUSG00000053825	327814	-3.2725	6.76226	-12.4761	3.16275e-05	0.0003816	3.19836	DOWN
11357	A_51_P199168	Cidea	NM_007702	ref|Mus musculus cell death-inducing DNA fragmentation factor, alpha subunit-like effector A (Cidea), mRNA [NM_007702]	ENSMUSG00000024526	12683	6.25022	12.8119	12.4586	3.18638e-05	0.000384226	3.19036	UP
24800	A_52_P599478	Fam181a	NM_001195726	ref|Mus musculus family with sequence similarity 181, member A (Fam181a), mRNA [NM_001195726]	ENSMUSG00000096753	100504156	-2.8376	5.48786	-12.4572	3.18837e-05	0.000384242	3.18969	DOWN
26243	A_51_P229911	Adcy4	NM_080435	ref|Mus musculus adenylate cyclase 4 (Adcy4), mRNA [NM_080435]	ENSMUSG00000022220	104110	3.86415	7.90979	12.4496	3.1987e-05	0.000384768	3.18621	UP
3035	A_51_P306710	Cldn15	NM_021719	ref|Mus musculus claudin 15 (Cldn15), mRNA [NM_021719]	ENSMUSG00000001739	60363	4.14536	6.52601	12.4495	3.19881e-05	0.000384768	3.18618	UP
30682	A_55_P2137466	Kcnu1	NM_008432	ref|Mus musculus potassium channel, subfamily U, member 1 (Kcnu1), mRNA [NM_008432]	ENSMUSG00000031576	16532	-2.92301	7.37996	-12.4493	3.19915e-05	0.000384768	3.18606	DOWN
19243	A_55_P1992555	Gys2	NM_145572	ref|Mus musculus glycogen synthase 2 (Gys2), mRNA [NM_145572]	ENSMUSG00000030244	232493	7.15762	6.44131	12.4485	3.20019e-05	0.000384768	3.18571	UP
20114	A_55_P2057946	Hsp90aa1	NM_010480	ref|Mus musculus heat shock protein 90, alpha (cytosolic), class A member 1 (Hsp90aa1), mRNA [NM_010480]	ENSMUSG00000021270	15519	-2.45644	14.5024	-12.446	3.20355e-05	0.000384948	3.18459	DOWN
30941	A_55_P2078433	Mcoln2	NM_026656	ref|Mus musculus mucolipin 2 (Mcoln2), transcript variant 1, mRNA [NM_026656]	ENSMUSG00000011008	68279	3.07987	6.12737	12.4305	3.22484e-05	0.000387281	3.17747	UP
37387	A_51_P414637	Col5a1	NM_015734	ref|Mus musculus collagen, type V, alpha 1 (Col5a1), mRNA [NM_015734]	ENSMUSG00000026837	12831	3.4881	6.73322	12.4284	3.22769e-05	0.000387398	3.17652	UP
16617	A_55_P2023306	Pcdha9	NM_138661	ref|Mus musculus protocadherin alpha 9 (Pcdha9), mRNA [NM_138661]	ENSMUSG00000103770	192161	-3.5045	6.30054	-12.4261	3.23092e-05	0.000387561	3.17544	DOWN
19770	A_51_P513661	Slc4a8	NM_021530	ref|Mus musculus solute carrier family 4 (anion exchanger), member 8 (Slc4a8), mRNA [NM_021530]	ENSMUSG00000023032	59033	-3.16531	10.8653	-12.4163	3.24449e-05	0.000388962	3.17094	DOWN
8113	A_55_P2108012	Fam78b	NM_001160262	ref|Mus musculus family with sequence similarity 78, member B (Fam78b), transcript variant 1, mRNA [NM_001160262]	ENSMUSG00000060568	226610	-2.32284	9.49717	-12.4111	3.25177e-05	0.000389609	3.16852	DOWN
35204	A_51_P455866	Elf5	NM_010125	ref|Mus musculus E74-like factor 5 (Elf5), transcript variant 1, mRNA [NM_010125]	ENSMUSG00000027186	13711	-3.54217	6.08499	-12.4065	3.25817e-05	0.000390018	3.16641	DOWN
16753	A_55_P1952533	Fis1	NM_001163243	ref|Mus musculus fission 1 (mitochondrial outer membrane) homolog (yeast) (Fis1), nuclear gene encoding mitochondrial protein, transcript variant 2, mRNA [NM_001163243]	ENSMUSG00000019054	66437	-2.0095	12.079	-12.4059	3.25896e-05	0.000390018	3.16615	DOWN
13479	A_55_P2150734	ENSMUST00000103444	ENSMUST00000103444	ens|predicted gene, 16971 [Source:MGI Symbol;Acc:MGI:4439895] [ENSMUST00000103444]	ENSMUST00000103444	NA	2.67665	4.72064	12.4021	3.2643e-05	0.00039043	3.16439	UP
2320	A_55_P2091120	Kbtbd12	NM_001142724	ref|Mus musculus kelch repeat and BTB (POZ) domain containing 12 (Kbtbd12), transcript variant 1, mRNA [NM_001142724]	ENSMUSG00000033182	74589	2.64583	4.68099	12.398	3.26999e-05	0.00039056	3.16252	UP
27989	A_51_P414126	Rab19	NM_011226	ref|Mus musculus RAB19, member RAS oncogene family (Rab19), mRNA [NM_011226]	ENSMUSG00000029923	19331	2.46044	6.26331	12.3963	3.2723e-05	0.00039056	3.16176	UP
36442	A_55_P1964568	Megf10	NM_001001979	ref|Mus musculus multiple EGF-like-domains 10 (Megf10), mRNA [NM_001001979]	ENSMUSG00000024593	70417	-5.07716	8.47795	-12.3932	3.27672e-05	0.000390784	3.16031	DOWN
15718	A_51_P477458	Grid2	NM_008167	ref|Mus musculus glutamate receptor, ionotropic, delta 2 (Grid2), mRNA [NM_008167]	ENSMUSG00000071424	14804	-2.20247	4.878	-12.3898	3.28155e-05	0.000391133	3.15872	DOWN
9141	A_51_P407165	Abhd5	NM_026179	ref|Mus musculus abhydrolase domain containing 5 (Abhd5), mRNA [NM_026179]	ENSMUSG00000032540	67469	2.42771	8.74132	12.3884	3.28344e-05	0.000391133	3.1581	UP
12669	A_52_P836852	Txk	NM_013698	ref|Mus musculus TXK tyrosine kinase (Txk), transcript variant 2, mRNA [NM_013698]	ENSMUSG00000054892	22165	2.64511	4.54709	12.3828	3.2913e-05	0.000391843	3.15553	UP
28385	A_52_P223269	Zfp37	NM_009554	ref|Mus musculus zinc finger protein 37 (Zfp37), mRNA [NM_009554]	ENSMUSG00000028389	22696	-2.80807	5.85241	-12.3799	3.29544e-05	0.00039211	3.15418	DOWN
19295	A_55_P1990032	Cxcl5	NM_009141	ref|Mus musculus chemokine (C-X-C motif) ligand 5 (Cxcl5), mRNA [NM_009141]	ENSMUSG00000029371	20311	-2.454	4.18005	-12.3775	3.2988e-05	0.000392284	3.15308	DOWN
12314	A_55_P2004354	Gm2694	NR_033430	ref|Mus musculus predicted gene 2694 (Gm2694), non-coding RNA [NR_033430]	ENSMUSG00000097248	100040294	-2.67411	8.20251	-12.3665	3.31445e-05	0.000393918	3.14799	DOWN
2080	A_51_P507333	Kcnc2	NM_001025581	ref|Mus musculus potassium voltage gated channel, Shaw-related subfamily, member 2 (Kcnc2), mRNA [NM_001025581]	ENSMUSG00000035681	268345	-4.39413	8.21877	-12.3594	3.32451e-05	0.000394799	3.14473	DOWN
14550	A_55_P1957413	Lsp1	NM_019391	ref|Mus musculus lymphocyte specific 1 (Lsp1), transcript variant 2, mRNA [NM_019391]	ENSMUSG00000018819	16985	3.01164	11.4052	12.3581	3.32637e-05	0.000394799	3.14413	UP
12282	A_55_P2002918	Klc2	NM_008451	ref|Mus musculus kinesin light chain 2 (Klc2), mRNA [NM_008451]	ENSMUSG00000024862	16594	-2.73873	13.8801	-12.3573	3.3276e-05	0.000394799	3.14373	DOWN
22347	A_51_P330044	Cyp2j9	NM_028979	ref|Mus musculus cytochrome P450, family 2, subfamily j, polypeptide 9 (Cyp2j9), mRNA [NM_028979]	ENSMUSG00000015224	74519	-3.21915	10.7818	-12.3398	3.35267e-05	0.000397317	3.13566	DOWN
17330	A_55_P1980308	Stap1	NM_019992	ref|Mus musculus signal transducing adaptor family member 1 (Stap1), mRNA [NM_019992]	ENSMUSG00000029254	56792	2.84059	4.42643	12.3344	3.36041e-05	0.000398006	3.13317	UP
460	A_52_P136782	Rgs5	NM_009063	ref|Mus musculus regulator of G-protein signaling 5 (Rgs5), mRNA [NM_009063]	ENSMUSG00000026678	19737	3.03904	9.56656	12.3272	3.37093e-05	0.000399023	3.12981	UP
15247	A_55_P2051716	Tbx1	NM_011532	ref|Mus musculus T-box 1 (Tbx1), mRNA [NM_011532]	ENSMUSG00000009097	21380	5.01213	9.17331	12.3211	3.37981e-05	0.000399675	3.12698	UP
1915	A_55_P2131168	Sv2c	NM_029210	ref|Mus musculus synaptic vesicle glycoprotein 2c (Sv2c), mRNA [NM_029210]	ENSMUSG00000051111	75209	-2.04968	5.8647	-12.316	3.38725e-05	0.000399675	3.12461	DOWN
924	A_51_P415126	Tgfa	NM_031199	ref|Mus musculus transforming growth factor alpha (Tgfa), mRNA [NM_031199]	ENSMUSG00000029999	21802	-2.64464	6.02042	-12.3151	3.38848e-05	0.000399675	3.12422	DOWN
12365	A_55_P2007964	Cx3cr1	NM_009987	ref|Mus musculus chemokine (C-X3-C) receptor 1 (Cx3cr1), mRNA [NM_009987]	ENSMUSG00000052336	13051	-3.59514	9.09416	-12.3147	3.38905e-05	0.000399675	3.12404	DOWN
28902	A_51_P315666	Nid2	NM_008695	ref|Mus musculus nidogen 2 (Nid2), mRNA [NM_008695]	ENSMUSG00000021806	18074	3.10883	6.34616	12.3144	3.38956e-05	0.000399675	3.12388	UP
24921	A_51_P359262	Sec11c	NM_025468	ref|Mus musculus SEC11 homolog C (S. cerevisiae) (Sec11c), mRNA [NM_025468]	ENSMUSG00000024516	66286	-2.54939	10.9155	-12.3141	3.39e-05	0.000399675	3.12374	DOWN
17081	A_51_P239286	Bcl2l12	NM_029410	ref|Mus musculus BCL2-like 12 (proline rich) (Bcl2l12), mRNA [NM_029410]	ENSMUSG00000003190	75736	2.10166	7.95246	12.31	3.39603e-05	0.00039995	3.12183	UP
1728	A_51_P270355	Dclk1	NM_019978	ref|Mus musculus doublecortin-like kinase 1 (Dclk1), transcript variant 1, mRNA [NM_019978]	ENSMUSG00000027797	13175	-2.55669	7.55659	-12.3098	3.3962e-05	0.00039995	3.12177	DOWN
21665	A_55_P2137421	Trpv4	NM_022017	ref|Mus musculus transient receptor potential cation channel, subfamily V, member 4 (Trpv4), mRNA [NM_022017]	ENSMUSG00000014158	63873	2.05373	6.61069	12.3047	3.4037e-05	0.000400459	3.1194	UP
23151	A_51_P343309	Cmas	NM_009908	ref|Mus musculus cytidine monophospho-N-acetylneuraminic acid synthetase (Cmas), mRNA [NM_009908]	ENSMUSG00000030282	12764	-2.06231	10.1157	-12.3042	3.40441e-05	0.000400459	3.11917	DOWN
10369	A_55_P2094955	Grm1	NM_001114333	ref|Mus musculus glutamate receptor, metabotropic 1 (Grm1), transcript variant 2, mRNA [NM_001114333]	ENSMUSG00000019828	14816	-2.51097	6.11988	-12.2928	3.42128e-05	0.000402149	3.11385	DOWN
27084	A_55_P2394308	Fst	NM_008046	ref|Mus musculus follistatin (Fst), mRNA [NM_008046]	ENSMUSG00000021765	14313	4.22623	6.58039	12.2918	3.42267e-05	0.000402149	3.11341	UP
27603	A_55_P1954034	Jakmip1	NM_178394	ref|Mus musculus janus kinase and microtubule interacting protein 1 (Jakmip1), mRNA [NM_178394]	ENSMUSG00000063646	76071	-2.29325	7.177	-12.2843	3.43377e-05	0.000403224	3.10993	DOWN
10230	A_55_P2002903	Smoc2	NM_022315	ref|Mus musculus SPARC related modular calcium binding 2 (Smoc2), mRNA [NM_022315]	ENSMUSG00000023886	64074	4.60622	9.11782	12.2816	3.43781e-05	0.000403469	3.10866	UP
17925	A_66_P104180	2310015D24Rik	NR_037997	ref|Mus musculus RIKEN cDNA 2310015D24 gene (2310015D24Rik), non-coding RNA [NR_037997]	ENSMUSG00000099411	70100	2.00106	4.31468	12.278	3.44325e-05	0.000403878	3.10695	UP
929	A_51_P122649	Degs2	NM_027299	ref|Mus musculus degenerative spermatocyte homolog 2 (Drosophila), lipid desaturase (Degs2), transcript variant 1, mRNA [NM_027299]	ENSMUSG00000021263	70059	-2.52954	6.90158	-12.2669	3.45973e-05	0.000405424	3.10181	DOWN
2038	A_51_P316553	Kdr	NM_010612	ref|Mus musculus kinase insert domain protein receptor (Kdr), mRNA [NM_010612]	ENSMUSG00000062960	16542	3.98567	8.49839	12.2656	3.46172e-05	0.000405424	3.1012	UP
10870	A_51_P388048	Pcdha4	NM_007766	ref|Mus musculus protocadherin alpha 4 (Pcdha4), mRNA [NM_007766]	ENSMUSG00000104252	12936	-2.52821	5.33456	-12.2651	3.46241e-05	0.000405424	3.10098	DOWN
17613	A_55_P2089402	Tmem200c	NM_001206661	ref|Mus musculus transmembrane protein 200C (Tmem200c), mRNA [NM_001206661]	ENSMUSG00000095407	622645	-2.78834	5.44188	-12.257	3.47462e-05	0.000406308	3.09719	DOWN
19461	A_52_P488623	Fam169a	NM_001100458	ref|Mus musculus family with sequence similarity 169, member A (Fam169a), transcript variant 1, mRNA [NM_001100458]	ENSMUSG00000041817	320557	-4.56696	6.90894	-12.2562	3.47578e-05	0.000406308	3.09683	DOWN
29265	A_52_P616332	Atp10d	NM_153389	ref|Mus musculus ATPase, class V, type 10D (Atp10d), mRNA [NM_153389]	ENSMUSG00000046808	231287	2.29073	5.20758	12.2455	3.49198e-05	0.00040797	3.09182	UP
9561	A_66_P112436	Prkar2b	NM_011158	ref|Mus musculus protein kinase, cAMP dependent regulatory, type II beta (Prkar2b), mRNA [NM_011158]	ENSMUSG00000002997	19088	3.72905	10.3063	12.2433	3.49531e-05	0.000408128	3.09079	UP
10138	A_51_P363214	D630045J12Rik	NM_194061	ref|Mus musculus RIKEN cDNA D630045J12 gene (D630045J12Rik), mRNA [NM_194061]	ENSMUSG00000063455	330286	-2.30034	5.76008	-12.2336	3.50999e-05	0.000409611	3.08628	DOWN
23792	A_55_P1956130	ENSMUST00000113877	ENSMUST00000113877	ens|histocompatibility 2, Q region locus 6 [Source:MGI Symbol;Acc:MGI:95935] [ENSMUST00000113877]	ENSMUST00000113877	NA	2.20007	11.6598	12.218	3.53374e-05	0.000411918	3.07901	UP
33485	A_51_P439584	Rhov	NM_145530	ref|Mus musculus ras homolog gene family, member V (Rhov), mRNA [NM_145530]	ENSMUSG00000034226	228543	-3.57804	6.29616	-12.2133	3.54104e-05	0.000412535	3.07678	DOWN
14794	A_55_P2042156	Aatk	NM_007377	ref|Mus musculus apoptosis-associated tyrosine kinase (Aatk), transcript variant 1, mRNA [NM_007377]	ENSMUSG00000025375	11302	-3.59765	12.1522	-12.2115	3.54377e-05	0.00041262	3.07595	DOWN
1684	A_51_P295085	Ogn	NM_008760	ref|Mus musculus osteoglycin (Ogn), mRNA [NM_008760]	ENSMUSG00000021390	18295	4.66099	8.33573	12.2068	3.55112e-05	0.000413243	3.07372	UP
2596	A_55_P2040678	Susd2	NM_027890	ref|Mus musculus sushi domain containing 2 (Susd2), transcript variant 1, mRNA [NM_027890]	ENSMUSG00000006342	71733	-2.12227	9.2887	-12.1958	3.56804e-05	0.000414745	3.06859	DOWN
28973	A_55_P2163774	Crip1	NM_007763	ref|Mus musculus cysteine-rich protein 1 (intestinal) (Crip1), mRNA [NM_007763]	ENSMUSG00000006360	12925	3.42072	12.2316	12.1917	3.57437e-05	0.000415177	3.06668	UP
1544	A_52_P199633	Trim30d	NM_199146	ref|Mus musculus tripartite motif-containing 30D (Trim30d), transcript variant 1, mRNA [NM_199146]	ENSMUSG00000057596	209387	2.44914	6.33189	12.1908	3.57578e-05	0.000415177	3.06626	UP
27772	A_55_P2329180	Ccdc148	NM_001001178	ref|Mus musculus coiled-coil domain containing 148 (Ccdc148), mRNA [NM_001001178]	ENSMUSG00000036641	227933	-2.19096	5.58182	-12.1825	3.58881e-05	0.000416222	3.06234	DOWN
17177	A_52_P578436	ENSMUST00000101325	ENSMUST00000101325	ens|predicted gene, 16730 [Source:MGI Symbol;Acc:MGI:4439654] [ENSMUST00000101325]	ENSMUST00000101325	NA	4.86162	7.13438	12.1769	3.59751e-05	0.000416996	3.05973	UP
3989	A_55_P2028484	Il1rapl1	NM_001160403	ref|Mus musculus interleukin 1 receptor accessory protein-like 1 (Il1rapl1), mRNA [NM_001160403]	ENSMUSG00000052372	331461	-2.21567	5.28515	-12.1746	3.60114e-05	0.000417138	3.05864	DOWN
7591	A_55_P2071626	C530008M17Rik	NM_001163793	ref|Mus musculus RIKEN cDNA C530008M17 gene (C530008M17Rik), mRNA [NM_001163793]	ENSMUSG00000036377	320827	-2.19155	5.88163	-12.1735	3.60278e-05	0.000417138	3.05815	DOWN
38105	A_51_P241319	Cilp	NM_173385	ref|Mus musculus cartilage intermediate layer protein, nucleotide pyrophosphohydrolase (Cilp), mRNA [NM_173385]	ENSMUSG00000042254	214425	5.18232	5.47809	12.1718	3.60545e-05	0.000417214	3.05735	UP
18034	A_55_P2086433	Oasl1	NM_145209	ref|Mus musculus 2'-5' oligoadenylate synthetase-like 1 (Oasl1), mRNA [NM_145209]	ENSMUSG00000041827	231655	2.32579	6.09053	12.1689	3.61001e-05	0.000417507	3.05598	UP
29021	A_55_P2061338	Slc16a11	NM_153081	ref|Mus musculus solute carrier family 16 (monocarboxylic acid transporters), member 11 (Slc16a11), transcript variant 3, mRNA [NM_153081]	ENSMUSG00000040938	216867	-2.50809	9.81764	-12.1634	3.61876e-05	0.000418285	3.05337	DOWN
33101	A_55_P2056654	Kif22	NM_145588	ref|Mus musculus kinesin family member 22 (Kif22), mRNA [NM_145588]	ENSMUSG00000030677	110033	-2.14187	8.52731	-12.1538	3.63391e-05	0.000419801	3.04887	DOWN
8859	A_55_P2003199	ENSMUST00000100731	ENSMUST00000100731	ens|SET domain containing 1B [Source:MGI Symbol;Acc:MGI:2652820] [ENSMUST00000100731]	ENSMUST00000100731	NA	2.23027	7.39059	12.1509	3.63849e-05	0.000420095	3.04751	UP
18618	A_55_P2289819	Cd163	NM_053094	ref|Mus musculus CD163 antigen (Cd163), transcript variant 2, mRNA [NM_053094]	ENSMUSG00000008845	93671	2.80531	4.14302	12.1496	3.64055e-05	0.000420098	3.0469	UP
595	A_51_P355151	Camk2n2	NM_028420	ref|Mus musculus calcium/calmodulin-dependent protein kinase II inhibitor 2 (Camk2n2), mRNA [NM_028420]	ENSMUSG00000051146	73047	-5.25368	13.7337	-12.1389	3.65759e-05	0.000421829	3.04186	DOWN
128	A_55_P2038787	Olfr78	NM_130866	ref|Mus musculus olfactory receptor 78 (Olfr78), transcript variant 1, mRNA [NM_130866]	ENSMUSG00000043366	170639	2.43021	4.96799	12.1249	3.68012e-05	0.00042419	3.03523	UP
9272	A_51_P379698	Fxyd7	NM_022007	ref|Mus musculus FXYD domain-containing ion transport regulator 7 (Fxyd7), mRNA [NM_022007]	ENSMUSG00000036578	57780	-3.70348	8.86937	-12.1154	3.69539e-05	0.000425475	3.03077	DOWN
9797	A_52_P638895	Vegfa	NM_001025250	ref|Mus musculus vascular endothelial growth factor A (Vegfa), transcript variant 1, mRNA [NM_001025250]	ENSMUSG00000023951	22339	3.47345	9.74283	12.112	3.70094e-05	0.000425877	3.02915	UP
27405	A_51_P436068	Gpr182	NM_007412	ref|Mus musculus G protein-coupled receptor 182 (Gpr182), mRNA [NM_007412]	ENSMUSG00000058396	11536	3.90428	7.44245	12.1093	3.70531e-05	0.000426142	3.02787	UP
3544	A_51_P182311	Clec2i	NM_020257	ref|Mus musculus C-type lectin domain family 2, member i (Clec2i), mRNA [NM_020257]	ENSMUSG00000030365	93675	2.9942	5.25331	12.1028	3.71577e-05	0.000426632	3.02483	UP
4347	A_55_P2039881	Sept5	NM_213614	ref|Mus musculus septin 5 (Sept5), mRNA [NM_213614]	ENSMUSG00000072214	18951	-3.43852	8.72238	-12.1015	3.7179e-05	0.000426638	3.02421	DOWN
5598	A_51_P182303	Col1a2	NM_007743	ref|Mus musculus collagen, type I, alpha 2 (Col1a2), mRNA [NM_007743]	ENSMUSG00000029661	12843	2.29868	12.5644	12.0943	3.72969e-05	0.000427366	3.0208	UP
4176	A_51_P137604	Fcna	NM_007995	ref|Mus musculus ficolin A (Fcna), mRNA [NM_007995]	ENSMUSG00000026938	14133	4.99369	5.69211	12.0878	3.7403e-05	0.000427449	3.01773	UP
21932	A_55_P2072816	Cnksr2	NM_177751	ref|Mus musculus connector enhancer of kinase suppressor of Ras 2 (Cnksr2), mRNA [NM_177751]	ENSMUSG00000025658	245684	-2.67901	7.69459	-12.0863	3.74274e-05	0.000427449	3.01702	DOWN
16703	A_51_P172502	Cxcl12	NM_001012477	ref|Mus musculus chemokine (C-X-C motif) ligand 12 (Cxcl12), transcript variant 3, mRNA [NM_001012477]	ENSMUSG00000061353	20315	2.99168	9.17621	12.0863	3.74286e-05	0.000427449	3.01699	UP
21309	A_66_P122160	Pax6os1	NR_002867	ref|Mus musculus Pax6 opposite strand transcript 1 (Pax6os1), non-coding RNA [NR_002867]	ENSMUSG00000086029	402728	-2.13688	5.35118	-12.0861	3.74319e-05	0.000427449	3.01689	DOWN
34487	A_52_P592909	Dgat2	NM_026384	ref|Mus musculus diacylglycerol O-acyltransferase 2 (Dgat2), mRNA [NM_026384]	ENSMUSG00000030747	67800	5.47978	13.2088	12.0836	3.74724e-05	0.000427449	3.01573	UP
22259	A_52_P358406	ENSMUST00000103518	ENSMUST00000103518	ens|predicted gene, 16966 [Source:MGI Symbol;Acc:MGI:4439890] [ENSMUST00000103518]	ENSMUST00000103518	NA	3.80347	5.09087	12.0831	3.74806e-05	0.000427449	3.01549	UP
15381	A_52_P466147	Rarres2	NM_027852	ref|Mus musculus retinoic acid receptor responder (tazarotene induced) 2 (Rarres2), mRNA [NM_027852]	ENSMUSG00000009281	71660	3.16218	11.5582	12.0827	3.74876e-05	0.000427449	3.01529	UP
6409	A_55_P2030612	ENSMUST00000079189	ENSMUST00000079189	ens|RIKEN cDNA 4922502B01 gene [Source:MGI Symbol;Acc:MGI:1918204] [ENSMUST00000079189]	ENSMUST00000079189	NA	-2.44909	4.45234	-12.0821	3.74964e-05	0.000427449	3.01504	DOWN
13493	A_55_P2011390	Tead1	NM_001166584	ref|Mus musculus TEA domain family member 1 (Tead1), transcript variant 1, mRNA [NM_001166584]	ENSMUSG00000055320	21676	2.87815	7.18251	12.082	3.74981e-05	0.000427449	3.01499	UP
3842	A_55_P2009582	Nkg7	NM_024253	ref|Mus musculus natural killer cell group 7 sequence (Nkg7), mRNA [NM_024253]	ENSMUSG00000004612	72310	2.5335	7.3389	12.0786	3.75547e-05	0.000427858	3.01336	UP
25311	A_51_P222657	Tspo	NM_009775	ref|Mus musculus translocator protein (Tspo), mRNA [NM_009775]	ENSMUSG00000041736	12257	4.57612	10.8674	12.0737	3.76358e-05	0.000428545	3.01103	UP
18832	A_55_P2013823	Gal3st1	NM_016922	ref|Mus musculus galactose-3-O-sulfotransferase 1 (Gal3st1), transcript variant 1, mRNA [NM_016922]	ENSMUSG00000049721	53897	-5.87182	9.11833	-12.0715	3.76713e-05	0.000428628	3.01001	DOWN
7563	A_52_P654534	Dmbx1	NM_130865	ref|Mus musculus diencephalon/mesencephalon homeobox 1 (Dmbx1), transcript variant 1, mRNA [NM_130865]	ENSMUSG00000028707	140477	-3.42394	4.73311	-12.0707	3.76845e-05	0.000428628	3.00963	DOWN
34058	A_55_P2010912	Jak3	NM_001190830	ref|Mus musculus Janus kinase 3 (Jak3), transcript variant 2, mRNA [NM_001190830]	ENSMUSG00000031805	16453	3.35337	6.41759	12.0585	3.78878e-05	0.000430702	3.00382	UP
22753	A_55_P2028894	Gata4	NM_008092	ref|Mus musculus GATA binding protein 4 (Gata4), mRNA [NM_008092]	ENSMUSG00000021944	14463	2.3177	4.81386	12.0524	3.79888e-05	0.000431613	3.00095	UP
15756	A_51_P294643	Cdr2	NM_007672	ref|Mus musculus cerebellar degeneration-related 2 (Cdr2), mRNA [NM_007672]	ENSMUSG00000030878	12585	-2.63109	9.27994	-12.0473	3.80743e-05	0.000431919	2.99852	DOWN
19979	A_55_P2223851	ENSMUST00000104938	ENSMUST00000104938	ens|predicted gene 17123 [Source:MGI Symbol;Acc:MGI:4937950] [ENSMUST00000104938]	ENSMUST00000104938	NA	3.69829	7.52906	12.0329	3.83173e-05	0.000434367	2.99165	UP
30095	A_52_P311313	Hcn1	NM_010408	ref|Mus musculus hyperpolarization-activated, cyclic nucleotide-gated K+ 1 (Hcn1), mRNA [NM_010408]	ENSMUSG00000021730	15165	-2.29388	5.82224	-12.0317	3.83364e-05	0.000434367	2.99111	DOWN
6897	A_55_P1999324	Nudt6	NM_153561	ref|Mus musculus nudix (nucleoside diphosphate linked moiety X)-type motif 6 (Nudt6), mRNA [NM_153561]	ENSMUSG00000050174	229228	2.03914	7.54173	12.0254	3.84426e-05	0.000435331	2.98812	UP
21763	A_55_P1952882	Cyp4f18	AF233647	gb|Mus musculus cytochrome P450 CYP4F18 mRNA, complete cds. [AF233647]	ENSMUSG00000003484	72054	2.52282	8.10004	12.0227	3.84888e-05	0.000435616	2.98682	UP
11249	A_55_P2088630	Ap3s2	NM_009682	ref|Mus musculus adaptor-related protein complex 3, sigma 2 subunit (Ap3s2), mRNA [NM_009682]	ENSMUSG00000063801	11778	-2.09147	12.3378	-12.0206	3.8525e-05	0.000435686	2.98581	DOWN
13545	A_55_P2089799	Atp6v1g2	ENSMUST00000143289	ens|ATPase, H+ transporting, lysosomal V1 subunit G2 [Source:MGI Symbol;Acc:MGI:1913487] [ENSMUST00000143289]	ENSMUSG00000024403	66237	-2.43021	8.1168	-12.0199	3.85372e-05	0.000435686	2.98547	DOWN
24906	A_55_P2001920	Flna	NM_010227	ref|Mus musculus filamin, alpha (Flna), mRNA [NM_010227]	ENSMUSG00000031328	192176	2.71052	12.0814	12.0137	3.86426e-05	0.000436639	2.98251	UP
2319	A_55_P2117664	Rnf165	NM_001164504	ref|Mus musculus ring finger protein 165 (Rnf165), mRNA [NM_001164504]	ENSMUSG00000025427	225743	-2.35586	8.05827	-12.0068	3.87599e-05	0.000437724	2.97924	DOWN
38361	A_51_P105589	Eci1	NM_010023	ref|Mus musculus enoyl-Coenzyme A delta isomerase 1 (Eci1), nuclear gene encoding mitochondrial protein, mRNA [NM_010023]	ENSMUSG00000024132	13177	3.36654	13.376	11.9962	3.89421e-05	0.000439541	2.97417	UP
25290	A_52_P70796	Cxcr5	NM_007551	ref|Mus musculus chemokine (C-X-C motif) receptor 5 (Cxcr5), mRNA [NM_007551]	ENSMUSG00000047880	12145	5.14358	5.24033	11.9927	3.90012e-05	0.000439967	2.97253	UP
18909	A_55_P2002019	ENSMUST00000163566	ENSMUST00000163566	ens|predicted gene 6401 [Source:MGI Symbol;Acc:MGI:3645739] [ENSMUST00000163566]	ENSMUST00000163566	NA	-2.61425	6.38738	-11.9896	3.90544e-05	0.000440328	2.97106	DOWN
30109	A_52_P651393	Epha10	NM_177671	ref|Mus musculus Eph receptor A10 (Epha10), mRNA [NM_177671]	ENSMUSG00000028876	230735	-2.54113	5.34526	-11.9847	3.91392e-05	0.000440919	2.96871	DOWN
22205	A_55_P2424767	Hecw1	NM_001081348	ref|Mus musculus HECT, C2 and WW domain containing E3 ubiquitin protein ligase 1 (Hecw1), mRNA [NM_001081348]	ENSMUSG00000021301	94253	2.97423	10.0336	11.9841	3.91496e-05	0.000440919	2.96843	UP
1276	A_51_P346445	Hspb7	NM_013868	ref|Mus musculus heat shock protein family, member 7 (cardiovascular) (Hspb7), mRNA [NM_013868]	ENSMUSG00000006221	29818	6.6388	6.051	11.9804	3.92138e-05	0.000441401	2.96666	UP
6614	A_55_P2095854	Rab3c	NM_023852	ref|Mus musculus RAB3C, member RAS oncogene family (Rab3c), mRNA [NM_023852]	ENSMUSG00000021700	67295	-2.1753	11.1319	-11.9748	3.93121e-05	0.000442266	2.96395	DOWN
27238	A_55_P2078335	Mapk4	NM_172632	ref|Mus musculus mitogen-activated protein kinase 4 (Mapk4), mRNA [NM_172632]	ENSMUSG00000024558	225724	-2.24972	5.84819	-11.9628	3.95207e-05	0.000444129	2.95823	DOWN
28259	A_55_P2036026	Robo4	NM_028783	ref|Mus musculus roundabout homolog 4 (Drosophila) (Robo4), mRNA [NM_028783]	ENSMUSG00000032125	74144	3.63918	10.3432	11.9606	3.95603e-05	0.000444227	2.95715	UP
31172	A_55_P2114118	Cadm1	NM_207675	ref|Mus musculus cell adhesion molecule 1 (Cadm1), transcript variant 1, mRNA [NM_207675]	ENSMUSG00000032076	54725	-2.77926	8.17853	-11.9595	3.95787e-05	0.000444227	2.95664	DOWN
36710	A_55_P2042738	Tmem196	NM_001160385	ref|Mus musculus transmembrane protein 196 (Tmem196), mRNA [NM_001160385]	ENSMUSG00000048004	217951	-2.3641	5.13409	-11.9585	3.95961e-05	0.000444227	2.95617	DOWN
8526	A_55_P2052197	Cacng4	NM_019431	ref|Mus musculus calcium channel, voltage-dependent, gamma subunit 4 (Cacng4), mRNA [NM_019431]	ENSMUSG00000020723	54377	-3.1612	5.46494	-11.9572	3.96185e-05	0.000444227	2.95556	DOWN
24148	A_55_P2047275	Tspan7	NM_019634	ref|Mus musculus tetraspanin 7 (Tspan7), mRNA [NM_019634]	ENSMUSG00000058254	21912	-2.13162	14.2406	-11.9562	3.9637e-05	0.000444227	2.95505	DOWN
18187	A_52_P569375	Fgf5	NM_010203	ref|Mus musculus fibroblast growth factor 5 (Fgf5), mRNA [NM_010203]	ENSMUSG00000029337	14176	-2.09477	5.313	-11.9509	3.97295e-05	0.000444968	2.95253	DOWN
17156	A_55_P2112120	Tnk2	NM_016788	ref|Mus musculus tyrosine kinase, non-receptor, 2 (Tnk2), transcript variant 1, mRNA [NM_016788]	ENSMUSG00000022791	51789	-2.55573	12.4318	-11.95	3.97462e-05	0.000444968	2.95208	DOWN
23646	A_55_P2137527	Fam183b	NM_029283	ref|Mus musculus family with sequence similarity 183, member B (Fam183b), transcript variant 1, mRNA [NM_029283]	ENSMUSG00000049154	75429	-4.75755	8.87812	-11.9431	3.98666e-05	0.000446074	2.9488	DOWN
17094	A_55_P2108993	Armcx6	NM_001007578	ref|Mus musculus armadillo repeat containing, X-linked 6 (Armcx6), mRNA [NM_001007578]	ENSMUSG00000050394	278097	-3.27106	7.59681	-11.9407	3.99097e-05	0.000446314	2.94764	DOWN
38541	A_55_P2139326	Baiap3	NM_001163270	ref|Mus musculus BAI1-associated protein 3 (Baiap3), mRNA [NM_001163270]	ENSMUSG00000047507	545192	-3.58017	6.74518	-11.9321	4.00625e-05	0.000447527	2.9435	DOWN
23621	A_55_P2088945	Vstm2b	NM_021387	ref|Mus musculus V-set and transmembrane domain containing 2B (Vstm2b), mRNA [NM_021387]	ENSMUSG00000039257	58188	-2.57101	5.35854	-11.9312	4.00786e-05	0.000447527	2.94307	DOWN
35417	A_51_P196718	Adcy1	NM_009622	ref|Mus musculus adenylate cyclase 1 (Adcy1), mRNA [NM_009622]	ENSMUSG00000020431	432530	-4.66162	9.426	-11.9309	4.00832e-05	0.000447527	2.94294	DOWN
35282	A_55_P1998406	Chchd3	AK145337	gb|Mus musculus 1 cell embryo 1 cell cDNA, RIKEN full-length enriched library, clone:I0C0011N18 product:coiled-coil-helix-coiled-coil-helix domain containing 3, full insert sequence. [AK145337]	ENSMUSG00000053768	66075	2.16729	10.2839	11.9234	4.02182e-05	0.000448791	2.93931	UP
37467	A_55_P2040011	Itga7	NM_008398	ref|Mus musculus integrin alpha 7 (Itga7), mRNA [NM_008398]	ENSMUSG00000025348	16404	2.11154	11.3814	11.9188	4.02993e-05	0.000449454	2.93713	UP
18276	A_51_P415607	Fkbp7	NM_010222	ref|Mus musculus FK506 binding protein 7 (Fkbp7), mRNA [NM_010222]	ENSMUSG00000002732	14231	2.41832	9.71874	11.9153	4.03619e-05	0.000449909	2.93545	UP
27885	A_55_P2227735	5330411J11Rik	AK017239	gb|Mus musculus adult male pituitary gland cDNA, RIKEN full-length enriched library, clone:5330411J11 product:unclassifiable, full insert sequence. [AK017239]	ENSMUSG00000087455	76676	-2.20019	2.62687	-11.9112	4.04352e-05	0.000450482	2.93349	DOWN
24170	A_55_P2161224	ENSMUST00000159190	ENSMUST00000159190	ens|predicted gene 7568 [Source:MGI Symbol;Acc:MGI:3649156] [ENSMUST00000159190]	ENSMUST00000159190	NA	-3.63771	4.91753	-11.9014	4.06126e-05	0.000451971	2.92875	DOWN
2849	A_51_P501364	Tbx21	NM_019507	ref|Mus musculus T-box 21 (Tbx21), mRNA [NM_019507]	ENSMUSG00000001444	57765	2.08149	5.11059	11.8981	4.06719e-05	0.000452297	2.92717	UP
5908	A_51_P428297	1700084M14Rik	XR_001621	ref|PREDICTED: Mus musculus RIKEN cDNA 1700084M14 gene (1700084M14Rik), miscRNA [XR_001621]	ENSMUSG00000057805	73487	-2.35854	4.82084	-11.8974	4.06857e-05	0.000452297	2.9268	DOWN
10776	A_52_P504787	Epha7	NM_010141	ref|Mus musculus Eph receptor A7 (Epha7), transcript variant 1, mRNA [NM_010141]	ENSMUSG00000028289	13841	-2.31884	6.04647	-11.8942	4.07427e-05	0.000452687	2.92529	DOWN
26435	A_51_P495269	Lor	NM_008508	ref|Mus musculus loricrin (Lor), mRNA [NM_008508]	ENSMUSG00000043165	16939	-4.13153	9.73818	-11.8907	4.08059e-05	0.000452882	2.92361	DOWN
36624	A_51_P237754	H2-T23	NM_010398	ref|Mus musculus histocompatibility 2, T region locus 23 (H2-T23), mRNA [NM_010398]	ENSMUSG00000067212	15040	2.14155	11.7992	11.89	4.08191e-05	0.000452882	2.92326	UP
7928	A_55_P2142488	Spry3	NM_001030293	ref|Mus musculus sprouty homolog 3 (Drosophila) (Spry3), mRNA [NM_001030293]	ENSMUSG00000061654	236576	-2.40935	4.81689	-11.8896	4.0826e-05	0.000452882	2.92308	DOWN
10982	A_55_P2032818	Trim2	NM_030706	ref|Mus musculus tripartite motif-containing 2 (Trim2), mRNA [NM_030706]	ENSMUSG00000027993	80890	-3.44025	10.2696	-11.8867	4.08783e-05	0.000453046	2.92169	DOWN
21144	A_55_P2343151	Akap1	NM_001042541	ref|Mus musculus A kinase (PRKA) anchor protein 1 (Akap1), nuclear gene encoding mitochondrial protein, transcript variant 2, mRNA [NM_001042541]	ENSMUSG00000018428	11640	2.41369	7.3781	11.8864	4.08848e-05	0.000453046	2.92152	UP
38932	A_51_P408363	Cfp	NM_008823	ref|Mus musculus complement factor properdin (Cfp), mRNA [NM_008823]	ENSMUSG00000001128	18636	2.6604	9.58863	11.8749	4.10944e-05	0.00045488	2.91599	UP
11127	A_51_P170476	Kcns1	NM_008435	ref|Mus musculus K+ voltage-gated channel, subfamily S, 1 (Kcns1), mRNA [NM_008435]	ENSMUSG00000040164	16538	-2.83764	5.68975	-11.8735	4.11195e-05	0.000454914	2.91533	DOWN
20727	A_51_P479786	Smtn	NM_013870	ref|Mus musculus smoothelin (Smtn), transcript variant 2, mRNA [NM_013870]	ENSMUSG00000020439	29856	3.71526	8.8133	11.8708	4.11696e-05	0.000454996	2.91401	UP
21580	A_55_P1979491	Cd28	NM_007642	ref|Mus musculus CD28 antigen (Cd28), mRNA [NM_007642]	ENSMUSG00000026012	12487	3.35255	5.95146	11.8707	4.11709e-05	0.000454996	2.91397	UP
15508	A_51_P304126	Necap1	NM_026267	ref|Mus musculus NECAP endocytosis associated 1 (Necap1), mRNA [NM_026267]	ENSMUSG00000030327	67602	-2.77024	11.4403	-11.8691	4.12006e-05	0.00045508	2.91319	DOWN
6685	A_55_P2051322	Efhd2	NM_025994	ref|Mus musculus EF hand domain containing 2 (Efhd2), mRNA [NM_025994]	ENSMUSG00000040659	27984	-2.43624	8.90703	-11.8624	4.13238e-05	0.000456065	2.90996	DOWN
13382	A_51_P265495	Ly6a	NM_010738	ref|Mus musculus lymphocyte antigen 6 complex, locus A (Ly6a), mRNA [NM_010738]	ENSMUSG00000075602	110454	2.39177	11.0938	11.8619	4.13339e-05	0.000456065	2.9097	UP
11503	A_55_P1977649	Hoxd8	NM_008276	ref|Mus musculus homeobox D8 (Hoxd8), mRNA [NM_008276]	ENSMUSG00000027102	15437	-2.74365	9.07708	-11.8562	4.14391e-05	0.000456981	2.90695	DOWN
18869	A_55_P2117959	Cyp4b1	NM_007823	ref|Mus musculus cytochrome P450, family 4, subfamily b, polypeptide 1 (Cyp4b1), mRNA [NM_007823]	ENSMUSG00000028713	13120	8.33849	6.27082	11.8537	4.14846e-05	0.000457051	2.90576	UP
27230	A_55_P1955778	Adamts4	NM_172845	ref|Mus musculus a disintegrin-like and metallopeptidase (reprolysin type) with thrombospondin type 1 motif, 4 (Adamts4), mRNA [NM_172845]	ENSMUSG00000006403	240913	-5.98327	9.49521	-11.8531	4.14967e-05	0.000457051	2.90544	DOWN
21547	A_52_P362828	Fat3	NM_001080814	ref|Mus musculus FAT tumor suppressor homolog 3 (Drosophila) (Fat3), mRNA [NM_001080814]	ENSMUSG00000074505	270120	-2.93461	5.15409	-11.8504	4.15471e-05	0.000457196	2.90413	DOWN
20377	A_55_P2338200	Glb1l2	NM_153803	ref|Mus musculus galactosidase, beta 1-like 2 (Glb1l2), mRNA [NM_153803]	ENSMUSG00000036395	244757	4.65523	6.84052	11.8476	4.15975e-05	0.000457506	2.90281	UP
8680	A_52_P615247	ENSMUST00000096862	ENSMUST00000096862	ens|Putative uncharacterized protein [Source:UniProtKB/TrEMBL;Acc:Q3TR44] [ENSMUST00000096862]	ENSMUST00000096862	NA	3.83044	5.24748	11.8284	4.19571e-05	0.00046097	2.89349	UP
8747	A_55_P2074796	Cdkn2c	NM_007671	ref|Mus musculus cyclin-dependent kinase inhibitor 2C (p18, inhibits CDK4) (Cdkn2c), mRNA [NM_007671]	ENSMUSG00000028551	12580	5.19415	6.45685	11.8264	4.19941e-05	0.000461131	2.89254	UP
26496	A_52_P232580	Dyrk3	NM_145508	ref|Mus musculus dual-specificity tyrosine-(Y)-phosphorylation regulated kinase 3 (Dyrk3), mRNA [NM_145508]	ENSMUSG00000016526	226419	-2.81762	7.37274	-11.8141	4.2226e-05	0.000463185	2.88657	DOWN
371	A_55_P2003414	Kng1	NM_023125	ref|Mus musculus kininogen 1 (Kng1), transcript variant 2, mRNA [NM_023125]	ENSMUSG00000022875	16644	6.83361	5.97361	11.8032	4.24328e-05	0.000464959	2.88128	UP
4077	A_51_P453475	Slc1a5	NM_009201	ref|Mus musculus solute carrier family 1 (neutral amino acid transporter), member 5 (Slc1a5), mRNA [NM_009201]	ENSMUSG00000001918	20514	7.68378	8.54004	11.7947	4.25961e-05	0.0004665	2.87712	UP
5048	A_51_P335569	Slco1a4	NM_030687	ref|Mus musculus solute carrier organic anion transporter family, member 1a4 (Slco1a4), mRNA [NM_030687]	ENSMUSG00000030237	28250	-3.43601	7.47621	-11.7861	4.27608e-05	0.000468056	2.87294	DOWN
11803	A_52_P515057	Slc25a24	NM_172685	ref|Mus musculus solute carrier family 25 (mitochondrial carrier, phosphate carrier), member 24 (Slc25a24), nuclear gene encoding mitochondrial protein, mRNA [NM_172685]	ENSMUSG00000040322	229731	2.46746	6.89094	11.7844	4.27936e-05	0.000468167	2.87211	UP
38611	A_51_P335419	Csl	NM_027945	ref|Mus musculus citrate synthase like (Csl), mRNA [NM_027945]	ENSMUSG00000046934	71832	3.21538	8.72356	11.7826	4.28275e-05	0.000468204	2.87125	UP
35361	A_52_P120740	0610030E20Rik	NM_026696	ref|Mus musculus RIKEN cDNA 0610030E20 gene (0610030E20Rik), mRNA [NM_026696]	ENSMUSG00000058706	68364	2.00404	7.96399	11.781	4.28575e-05	0.000468204	2.87049	UP
12227	A_55_P2250391	Nbea	NM_030595	ref|Mus musculus neurobeachin (Nbea), mRNA [NM_030595]	ENSMUSG00000027799	26422	-3.0289	7.95793	-11.7777	4.29218e-05	0.000468576	2.86887	DOWN
14016	A_55_P1972099	Acsm3	AK143946	gb|Mus musculus adult male kidney cDNA, RIKEN full-length enriched library, clone:F530003P09 product:SA rat hypertension-associated homolog, full insert sequence. [AK143946]	ENSMUSG00000030935	20216	6.24929	6.28616	11.7761	4.29529e-05	0.000468667	2.86808	UP
17596	A_51_P418560	Lnx2	NM_080795	ref|Mus musculus ligand of numb-protein X 2 (Lnx2), mRNA [NM_080795]	ENSMUSG00000016520	140887	2.52283	7.03653	11.7747	4.29792e-05	0.000468708	2.86742	UP
16746	A_52_P412585	Ear1	NM_007894	ref|Mus musculus eosinophil-associated, ribonuclease A family, member 1 (Ear1), mRNA [NM_007894]	ENSMUSG00000072601	13586	2.29087	5.05389	11.7667	4.31342e-05	0.000469712	2.86352	UP
1149	A_51_P106799	Pparg	NM_011146	ref|Mus musculus peroxisome proliferator activated receptor gamma (Pparg), transcript variant 2, mRNA [NM_011146]	ENSMUSG00000000440	19016	6.05343	9.48381	11.7666	4.31354e-05	0.000469712	2.86349	UP
3200	A_51_P450888	Rtn4r	NM_022982	ref|Mus musculus reticulon 4 receptor (Rtn4r), mRNA [NM_022982]	ENSMUSG00000043811	65079	-2.30464	5.35484	-11.7664	4.31396e-05	0.000469712	2.86338	DOWN
26305	A_51_P267314	Tbc1d10c	NM_178650	ref|Mus musculus TBC1 domain family, member 10c (Tbc1d10c), mRNA [NM_178650]	ENSMUSG00000040247	108995	3.94931	7.39378	11.7608	4.32499e-05	0.000470633	2.86061	UP
2499	A_55_P2012729	Kcnh2	NM_013569	ref|Mus musculus potassium voltage-gated channel, subfamily H (eag-related), member 2 (Kcnh2), mRNA [NM_013569]	ENSMUSG00000038319	16511	-4.04045	8.79408	-11.7597	4.32706e-05	0.000470633	2.86009	DOWN
33304	A_51_P342652	Cd79b	NM_008339	ref|Mus musculus CD79B antigen (Cd79b), mRNA [NM_008339]	ENSMUSG00000040592	15985	5.76798	7.86924	11.7585	4.32939e-05	0.000470633	2.85951	UP
23399	A_51_P372702	Il16	NM_010551	ref|Mus musculus interleukin 16 (Il16), mRNA [NM_010551]	ENSMUSG00000001741	16170	2.52802	7.51857	11.7574	4.33154e-05	0.000470633	2.85897	UP
16691	A_52_P102783	Dync2h1	NM_029851	ref|Mus musculus dynein cytoplasmic 2 heavy chain 1 (Dync2h1), mRNA [NM_029851]	ENSMUSG00000047193	110350	-2.14495	9.47139	-11.7492	4.34757e-05	0.00047163	2.85497	DOWN
24968	A_55_P2049811	Lmo3	ENSMUST00000163065	ens|LIM domain only 3 [Source:MGI Symbol;Acc:MGI:102810] [ENSMUST00000163065]	ENSMUSG00000030226	109593	-2.92372	5.91636	-11.7472	4.35135e-05	0.000471793	2.85403	DOWN
34066	A_55_P2059971	ENSMUST00000085008	ENSMUST00000085008	ens|predicted gene 9934 [Source:MGI Symbol;Acc:MGI:3641747] [ENSMUST00000085008]	ENSMUST00000085008	NA	-2.70107	4.76608	-11.7455	4.35479e-05	0.000471917	2.85317	DOWN
12448	A_51_P221248	Tspan32	NM_020286	ref|Mus musculus tetraspanin 32 (Tspan32), transcript variant 2, mRNA [NM_020286]	ENSMUSG00000000244	27027	2.4226	5.57725	11.7416	4.36236e-05	0.000472472	2.85129	UP
[truncated: 1,841 more rows]

## Sheet: Recovery vs Space
ProbeUID	ProbeName	GeneName	SystematicName	Description	Ensembl	Entrez	logFC	AveExpr	t	P.Value	adj.P.Val	B	Regulation
[truncated: 3,783 more rows]
